# Supplementary material for: Genetic analyses identify shared genetic components related to autoimmune and cardiovascular diseases
Source: Research Square preprint supplement (doi:10.21203/rs.3.rs-5305632/v1), 2024-10-28
Supplement: Supplementary file 1 [file bf47504b8556f6750f964f0e.xlsx]

## Sheet: Summary
Supplementary Table 1. Overview of all autoimmune diseases and cardiovascular diseases included in this study
Supplementary Table 2. Univariate and bivariate LDSC results for six autoimmune diseases and six cardiovascular diseases
Supplementary Table 3. Univariate and bivariate MiXeR results for six autoimmune diseases and six cardiovascular diseases
Supplementary Table 4. Univariate LAVA results for each six autoimmune diseases and six cardiovascular diseases
Supplementary Table 5. Bivariate LAVA results between six autoimmune diseases and six cardiovascular diseases
Supplementary Table 6. Genomic risk loci identified for results of six autoimmune diseases and six cardiovascular diseases using FUMA
Supplementary Table 7. Genomic risk loci identified for single trait GWAS results of six autoimmune diseases and six cardiovascular diseases using FUMA
Supplementary Table 8. Prioritized genes identified for PLACO results of six autoimmune diseases and six cardiovascular diseases by functional annotation and mapping of genomic risk loci using FUMA
Supplementary Table 9. Prioritized genes identified for single trait GWAS results of six autoimmune diseases and six cardiovascular diseases by functional annotation and mapping of genomic risk loci using FUMA
Supplementary Table 10. Candidate pleiotropic genes identified for PLACO results of six autoimmune diseases and six cardiovascular diseases using MAGMA and e-MAGMA
Supplementary Table 11. Gene-based analysis for all genes that were nominally significant for PLACO results between six autoimmune diseases and six cardiovascular diseases
Supplementary Table 12. Gene-based analysis for all genes that were nominally significant for single trait GWAS results of six autoimmune diseases and six cardiovascular diseases
Supplementary Table 13. S-LDSC-based heritability enrichment estimates in 49 tissue types or 489 functional categories between six autoimmune diseases and six cardiovascular diseases using LDSC-SEG
Supplementary Table 14. e-MAGMA analysis for 17 related tissue-specific genes that were nominally significant for PLACO results between six autoimmune diseases and six cardiovascular diseases
Supplementary Table 15. Transcriptome-wide association study analysis for 17 related tissue-specific genes that were nominally significant for single trait GWAS results of six autoimmune diseases and six cardiovascular diseases
Supplementary Table 16. Biological processes and enriched signaling pathways between six autoimmune diseases and six cardiovascular diseases
Supplementary Table 17. Therapeutic targets for the genes associated with six autoimmune diseases and six cardiovascular diseases
Supplementary Table 18. Causal relationship between six autoimmune diseases and six cardiovascular diseases

## Sheet: Supplementary Table 1
Supplementary Table 1. Overview of all autoimmune diseases and cardiovascular diseases included in this study
Note: Overview of all six autoimmune diseases and six cardiovascular diseases, abbreviations as used throughout the manuscript, associated PubMed ID, Data source and Year of publication, the sample size, population and reference genome on which summary statistics are based, and the number of SNPs included in the original summary statistics, before we applied filtering.
Trait	Abbreviations	PubMed ID	Data source	Year	Population	N	N case	N control	Reference genome	Original no. of SNPs
Rheumatoid arthritis	RA	36333501	https://www.ebi.ac.uk/gwas/studies/GCST90132223	2022	European	97173	22350	74823	GRCh37 (hg19)	13297690
Systemic lupus erythematosus	SLE	26502338	https://www.ebi.ac.uk/gwas/studies/GCST003156	2015	European	14267	5201	9066	GRCh37 (hg19)	7915251
Type 1 diabetes	T1D	34012112	https://www.ebi.ac.uk/gwas/studies/GCST90014023	2021	European	520580	18942	501638	GRCh37 (hg19)	62115237
Crohn's disease	CD	28067908	https://www.ebi.ac.uk/gwas/studies/GCST004132	2017	European	40266	12194	28072	GRCh37 (hg19)	9570787
Ulcerative colitis	UC	28067908	https://www.ebi.ac.uk/gwas/studies/GCST004133	2017	European	45975	12366	33609	GRCh37 (hg19)	9588016
Primary sclerosing cholangitis	PSC	27992413	https://www.ebi.ac.uk/gwas/studies/GCST004030	2016	European	14890	2871	12019	GRCh37 (hg19)	7891613
Atrial fibrillation	AF	30061737	https://www.ebi.ac.uk/gwas/studies/GCST006414	2018	European	1030836	60620	970216	GRCh37 (hg19)	34740186
Coronary artery disease	CAD	36474045	https://cvd.hugeamp.org/datasets.html	2022	European	1165690	181522	984168	GRCh37 (hg19)	20073070
Venous thromboembolism	VTE	36658437	https://www.ebi.ac.uk/gwas/studies/GCST90104539	2023	European	1500861	81190	1419671	GRCh37 (hg19)	7511476
Heart failure	HF	31919418	https://www.decode.com/summarydata/	2020	European	977323	47309	930014	GRCh37 (hg19)	9617942
Peripheral artery disease	PAD	34601942	https://www.ebi.ac.uk/gwas/studies/GCST009541	2021	European	511634	12086	499548	GRCh37 (hg19)	8281262
Stroke	NA	36180795	https://cvd.hugeamp.org/datasets.html	2022	European	1308460	73652	1234808	GRCh37 (hg19)	10250121

## Sheet: Supplementary Table 2
Supplementary Table 2. Univariate and bivariate LDSC results for six autoimmune diseases and six cardiovascular diseases
a) SNP-based heritability of six autoimmune diseases and six cardiovascular diseases computed using univariate LDSC
Note: SNP-based heritabilities (h2snp) for six autoimmune diseases and six cardiovascular diseases were calculated using LD Score regression, based on summary statistics. h2snp = SNP-based heritability estimate; h2snp_se = standard error of the SNP-based heritability estimate; h2snp_p =p value of the SNP-based heritability estimate; Mean χ2 = Mean chi-squared value across all SNPs in the analysis…
Trait	h2 snp	h2snp_se	h2snp_p	λGC	Mean χ2	int	int_se	ratio	ratio_se
RA	0.1314	0.0153	8.83e-18	1.2103	1.347	1.0758	0.0121	0.2186	0.0348
SLE	0.5758	0.0805	8.5e-13	1.4745	1.3636	1.1945	0.0113	0.5349	0.0311
T1D	0.0325	0.0038	1.2e-17	1.2103	1.4244	1.07	0.0128	0.1649	0.0301
CD	0.4223	0.046	4.29e-20	1.2731	1.467	1.1095	0.0122	0.2344	0.0262
UC	0.2582	0.0258	1.41e-23	1.2136	1.328	1.0902	0.0108	0.275	0.033
PSC	0.2432	0.0554	1.13e-05	1.0588	1.0901	1.0123	0.0095	0.1363	0.1051
AF	0.0259	0.0038	9.37e-12	1.3068	1.5848	1.0643	0.0137	0.11	0.0235
CAD	0.0337	0.0022	5.78e-53	1.4387	1.8167	1.0246	0.0161	0.0301	0.0197
VTE	0.0077	0.0007	3.82e-28	1.127	1.1632	1.0122	0.0095	0.0748	0.0584
HF	0.0099	0.0015	4.11e-11	1.0957	1.1111	1.0176	0.008	0.1579	0.0715
PAD	0.0061	0.0006	2.79e-24	1.2005	1.2399	1.077	0.0083	0.3212	0.0346
Stroke	0.018	0.0022	2.8e-16	1.3374	1.5838	1.0526	0.0113	0.09	0.0194
b) Genome-wide genetic correlations between six autoimmune diseases and six cardiovascular diseases computed using bivariate LDSC
Note: Genome-wide genetic correlations between six autoimmune diseases and six cardiovascular diseases were estimated by LD Score regression, based on summary statistics. Tests are two-sided and only tests significant after correcting for multiple testing were interpreted. rg = genetic correlation; re_se = standard error of rg; rg_z = Z-score of the rg; rg_p = p-value of the rg; h2_liab = SNP-bas…
P-values lower than the Bonferroni-corrected threshold (P = 0.05/36 combinations = 1.39E-03) are considered significant.
Trait 1	Trait 2	rg	rg_se	rg_z	rg_p	h2_liab	h2_liab_se	h2_int	h2_int_se	gcov_int	gcov_int_se
RA	AF	0.0554	0.0345	1.6054	0.1084	0.0265	0.0036	1.0549	0.0226	0.0097	0.0074
RA	CAD	0.0335	0.0404	0.8289	0.4071	0.0345	0.003	1.0113	0.0296	0.0164	0.0087
RA	VTE	0.1191	0.0373	3.1924	0.0014	0.0171	0.0016	1.0723	0.026	0.0075	0.0076
RA	HF	0.1117	0.0543	2.0572	0.0397	0.0077	0.0007	1.0117	0.0095	0.0075	0.007
RA	PAD	0.2069	0.0669	3.0941	0.002	0.0099	0.0015	1.0171	0.008	0.0029	0.0064
RA	Stroke	0.143	0.0531	2.6919	0.0071	0.0062	0.0006	1.0759	0.0085	0.0069	0.0073
SLE	AF	-0.0136	0.0464	-0.2933	0.7693	0.0265	0.0036	1.0549	0.0226	0.0087	0.0074
SLE	CAD	-0.0211	0.0401	-0.5278	0.5976	0.0345	0.003	1.0113	0.0296	0.0111	0.0077
SLE	VTE	0.0955	0.0421	2.2671	0.0234	0.0171	0.0016	1.0723	0.026	0.0003	0.0072
SLE	HF	0.0624	0.0667	0.9352	0.3497	0.0077	0.0007	1.0117	0.0095	-0.0014	0.0066
SLE	PAD	0.1038	0.0987	1.0522	0.2927	0.0099	0.0015	1.0171	0.008	-0.0019	0.0072
SLE	Stroke	0.0817	0.0726	1.1241	0.261	0.0062	0.0006	1.0759	0.0085	0.053	0.0071
T1D	AF	0.0225	0.0299	0.7523	0.4519	0.0266	0.0036	1.0543	0.0228	0.0078	0.0074
T1D	CAD	0.0703	0.0416	1.6925	0.0905	0.0345	0.003	1.0115	0.0299	0.0291	0.0093
T1D	VTE	0.0978	0.0339	2.8855	0.0039	0.0171	0.0016	1.0728	0.0262	-0.0045	0.0074
T1D	HF	0.05	0.0567	0.8816	0.378	0.0077	0.0007	1.0112	0.0095	0.0144	0.007
T1D	PAD	0.0588	0.0834	0.7055	0.4805	0.0099	0.0015	1.0172	0.008	0.0365	0.0081
T1D	Stroke	0.0953	0.0603	1.5802	0.1141	0.0062	0.0006	1.0756	0.0085	0.045	0.0077
CD	AF	0.0304	0.0355	0.857	0.3915	0.0265	0.0036	1.0549	0.0226	0.0212	0.0073
CD	CAD	0.0533	0.0314	1.6962	0.0898	0.0345	0.003	1.0113	0.0296	0.0363	0.0082
CD	VTE	0.0872	0.0309	2.8234	0.0048	0.0171	0.0016	1.0723	0.026	-0.0104	0.0072
CD	HF	0.0237	0.0483	0.4902	0.624	0.0077	0.0007	1.0117	0.0095	0.0161	0.0067
CD	PAD	0.0804	0.0599	1.3411	0.1799	0.0099	0.0015	1.0171	0.008	0.0053	0.0062
CD	Stroke	0.054	0.05	1.0813	0.2796	0.0062	0.0006	1.0759	0.0085	0.0305	0.0067
UC	AF	0.0383	0.0353	1.0855	0.2777	0.0265	0.0036	1.0549	0.0226	0.0128	0.0074
UC	CAD	-0.0254	0.0336	-0.7553	0.45	0.0345	0.003	1.0113	0.0296	0.0337	0.0082
UC	VTE	0.1172	0.0361	3.2517	0.0011	0.0171	0.0016	1.0723	0.026	-0.019	0.007
UC	HF	0.0308	0.059	0.5229	0.601	0.0077	0.0007	1.0117	0.0095	0.0062	0.0071
UC	PAD	-0.1053	0.0728	-1.4464	0.1481	0.0099	0.0015	1.0171	0.008	0.029	0.0067
UC	Stroke	-0.0217	0.0541	-0.4012	0.6882	0.0062	0.0006	1.0759	0.0085	0.0437	0.0066
PSC	AF	0.1285	0.059	2.1776	0.0294	0.0266	0.0036	1.0555	0.0236	-0.0026	0.0064
PSC	CAD	-0.0329	0.052	-0.6334	0.5264	0.0345	0.003	1.0122	0.0309	0.001	0.0072
PSC	VTE	-0.0088	0.0611	-0.1443	0.8853	0.0171	0.0016	1.0747	0.0272	-0.0039	0.0072
PSC	HF	0.0241	0.0927	0.2598	0.795	0.0077	0.0007	1.0122	0.0095	-0.0062	0.0061
PSC	PAD	-0.0803	0.1192	-0.6733	0.5008	0.0098	0.0015	1.0179	0.008	0.0019	0.0061
PSC	Stroke	-0.0517	0.0766	-0.6744	0.5001	0.0062	0.0006	1.0747	0.0087	0.04	0.0058

## Sheet: Supplementary Table 3
Supplementary Table 3. Univariate and bivariate MiXeR results for six autoimmune diseases and six cardiovascular diseases
a) Polygenicity of six autoimmune diseases and six cardiovascular diseases computed using univariate MiXeR
Note: Polygenicities for six autoimmune diseases and six cardiovascular diseases were estimated using univariate MiXeR. pi = polygenicity estimate; pi_se = standard error of the polygenicity estimate; sig2_beta = discoverability estimate; sig2_beta_se = standard error of the discoverability estimate; h2 = heritability estimate; h2_se = standard error of the heritability estimate; nc_p9 = the numb…
Trait	Trait polygenicity		Trait discoverability				Trait heritability		Number of trait-influencing variants (at 90% heritability)		Model selection (information criterions)
	pi	pi_se	sig2_beta	sig2_beta_se	sig2_zero	sig2_zero_se	h2	h2_se	nc_p9	nc_p9_se	AIC	BIC
RA	0.000165698	1.35791e-05	0.00044451	2.93606e-05	1.1317	0.00469923	0.151953	0.0052107	528.43	43.3054	690.486	681.413
SLE	1.31397e-05	1.8331e-06	0.00928763	0.00129163	1.22328	0.00253818	0.248475	0.0130086	41.904	5.84598	391.182	382.109
T1D	8.34624e-05	1.06692e-05	0.0010902	0.000159402	1.14067	0.00444594	0.185236	0.00486742	266.171	34.0252	1730.06	1720.99
CD	0.000132453	2.21192e-05	0.00166341	0.000318551	1.17078	0.00692814	0.442548	0.0108876	422.408	70.5408	1494.07	1485
UC	0.00013997	9.43785e-06	0.00092274	5.54884e-05	1.14521	0.00410743	0.266845	0.00842887	446.382	30.0984	761.639	752.566
PSC	2.73047e-05	1.02687e-05	0.00453738	0.00172695	0.992996	0.0048656	0.222905	0.0347309	87.0777	32.7481	137.022	127.95
AF	0.000124429	2.77711e-05	0.000366649	0.000127693	1.17958	0.0105237	0.0874472	0.00363119	396.82	88.5652	2352.89	2343.82
CAD	0.000562734	3.15761e-05	5.08618e-05	2.8522e-06	1.15347	0.00714211	0.0591677	0.00103556	1794.63	100.7	2233.06	2223.99
VTE	9.75604e-05	2.28137e-05	0.000307977	7.37047e-05	1.19821	0.0172477	0.0590236	0.00297257	311.131	72.7557	2133.22	2124.15
HF	0.00069955	9.93038e-05	2.21967e-05	2.58136e-06	1.04546	0.00444421	0.0317037	0.00179009	2230.95	316.692	29.0024	19.9297
PAD	0.000142734	1.26864e-05	0.000543063	4.41925e-05	1.05541	0.0032264	0.159737	0.00764872	455.195	40.4583	268.897	259.824
Stroke	0.000267329	2.25825e-05	3.61593e-05	2.4937e-06	1.1144	0.00386408	0.0199408	0.000869007	852.542	72.0182	85.1389	76.0662
b) Polygenic overlaps between six autoimmune diseases and six cardiovascular diseases computed using bivariate MiXeR
Note: Polygenic overlaps between six autoimmune diseases and six cardiovascular diseases were estimated using bivariate MiXeR. Dice = the ratio of shared variants to the total number of variants; Dice_se = standard error of Dice coefficient; nc1_p9, nc2_p9 and nc12_p9 = the number of influencial variants for trait1, trait2 and the overlap, respectively; nc1_p9_se, nc2_p9_se and nc12_p9_se = stand…
Trait1	Trait2	Dice Coefficient		Fraction of shared and trait-specific variants						Number of shared and trait-specific variants (at 90% heritability)						Measures of correlation						Congruency		Model selection (information criterions)
		Dice	Dice_se	pi1	pi1_se	pi2	pi2_se	pi12	pi12_se	nc1_p9	nc1_p9_se	nc2_p9	nc2_p9_se	nc12_p9	nc12_p9_se	rho_zero	rho_zero_se	rho_beta	rho_beta_se	rg	rg_se	fraction_concordant_within_shared	fraction_concordant_within_shared_se	best_vs_min_AIC	best_vs_min_BIC	best_vs_max_AIC	best_vs_max_BIC
RA	AF	0.110977	0.0446008	0.000149465	1.54073e-05	0.000108196	2.53156e-05	1.62333e-05	7.05492e-06	476.66	49.1358	345.05	80.7345	51.7699	22.499	0.0170108	0.00316915	0.102674	0.2079	0.0127069	0.0210979	0.532635	0.0686198	7.56435	-1.50834	134.44	125.367
RA	CAD	0.2081	0.0334315	8.98873e-05	1.23883e-05	0.000486924	3.17574e-05	7.58106e-05	1.28816e-05	286.661	39.5077	1552.86	101.278	241.769	41.081	0.0125524	0.00309167	0.293119	0.0754252	0.0706338	0.0128375	0.595013	0.0253172	21.0139	11.9412	35.342	26.2693
RA	VTE	0.194888	0.0621455	0.000140261	1.40221e-05	7.21231e-05	2.52872e-05	2.54373e-05	7.52231e-06	447.308	44.7182	230.009	80.6438	81.1226	23.9895	0.0134953	0.00217448	0.73176	0.189155	0.138262	0.0143878	0.775645	0.0907181	12.7565	3.68382	94.3195	85.2468
RA	HF	0.219702	0.0561579	7.01039e-05	2.84666e-05	0.000603956	8.61998e-05	9.5594e-05	2.82893e-05	223.57	90.7834	1926.09	274.901	304.861	90.2178	0.00923518	0.00268718	0.441421	0.158761	0.115113	0.0294053	0.648515	0.0592476	5.97568	-3.09701	5.20463	-3.86806
RA	PAD	0.237781	0.0377724	0.000129068	1.34242e-05	0.000106104	1.38951e-05	3.66298e-05	5.94784e-06	411.614	42.8114	338.378	44.3132	116.817	18.9684	0.00384202	0.00282846	0.889884	0.087358	0.210559	0.0266419	0.859764	0.0579722	1.68113	-7.39156	80.7677	71.695
RA	Stroke	0.307181	0.0837406	9.94492e-05	2.08702e-05	0.00020108	2.98175e-05	6.62487e-05	1.72842e-05	317.155	66.5576	641.267	95.0915	211.275	55.1214	0.00979346	0.00267591	0.64037	0.161252	0.19092	0.0306705	0.729173	0.0746588	3.74339	-5.3293	18.0426	8.96993
SLE	AF	0.0580975	0.0220556	9.15506e-06	2.45199e-06	0.000120445	2.70646e-05	3.98463e-06	1.74067e-06	29.1966	7.81969	384.113	86.3123	12.7075	5.5512	0.0101244	0.00279683	-0.863395	0.105078	-0.0848007	0.0334806	0.156468	0.0654688	-0.309566	-9.38226	26.7754	17.7028
SLE	CAD	0.0211166	0.0106659	7.13542e-06	3.07946e-06	0.00055673	3.27634e-05	6.00427e-06	2.96272e-06	22.7557	9.82076	1775.48	104.486	19.1483	9.44847	0.00291253	0.00316166	0.367381	0.514886	0.0357544	0.0305238	0.628569	0.183568	3.02627	-6.04642	9.10647	0.0337752
SLE	VTE	0.132995	0.0376936	5.73137e-06	2.9363e-06	9.01521e-05	2.11332e-05	7.40832e-06	2.74818e-06	18.278	9.36421	287.505	67.3963	23.626	8.76426	0.00589117	0.00272679	0.654137	0.196853	0.125251	0.0291521	0.739718	0.0928004	14.6986	5.62595	18.8692	9.79651
SLE	HF	0.0328319	0.00838012	1.65739e-06	2.15728e-06	0.000688068	9.9082e-05	1.14823e-05	2.41373e-06	5.2856	6.87982	2194.33	315.984	36.6184	7.69767	-0.000871858	0.00202893	0.855266	0.173161	0.104808	0.0339431	0.868928	0.118753	0.13961	-8.93308	-0.458142	-9.53083
SLE	PAD	0.115153	0.0285906	4.16614e-06	2.32217e-06	0.00013376	1.22875e-05	8.97355e-06	2.31705e-06	13.2863	7.40567	426.577	39.1864	28.6177	7.38934	-0.000413174	0.00292902	0.786372	0.132349	0.163263	0.0475835	0.798772	0.0718416	1.57071	-7.50198	4.18485	-4.88784
SLE	Stroke	0.0397872	0.0188882	7.58873e-06	2.26554e-06	0.000261778	2.27343e-05	5.55096e-06	2.55454e-06	24.2013	7.22506	834.839	72.5025	17.7027	8.14673	0.0461845	0.00332435	0.249739	0.543187	0.0343327	0.0486321	0.592063	0.199469	1.54268	-7.53001	2.20833	-6.86436
T1D	AF	0.0950334	0.0423259	7.3337e-05	1.07802e-05	0.000114304	2.53139e-05	1.01254e-05	5.12984e-06	233.88	34.3792	364.529	80.7291	32.2911	16.3597	0.00737718	0.00270441	0.34499	0.191701	0.0292857	0.0140625	0.614977	0.0672892	4.59661	-4.47608	163.312	154.24
T1D	CAD	0.171896	0.0202628	2.79508e-05	1.06805e-05	0.000507223	3.04136e-05	5.55116e-05	6.99728e-06	89.1383	34.0612	1617.59	96.9925	177.033	22.3151	0.0387673	0.00326396	0.134406	0.0663063	0.0330912	0.0146116	0.543005	0.0213218	40.2535	31.1808	11.8876	2.81486
T1D	VTE	0.248794	0.0613516	6.08216e-05	1.37281e-05	7.49196e-05	1.94871e-05	2.26408e-05	6.68104e-06	193.967	43.7805	238.927	62.1466	72.2042	21.3066	0.000599529	0.00303863	0.53836	0.11813	0.129721	0.0172237	0.682979	0.0448618	22.3661	13.2934	142.812	133.739
T1D	HF	0.101002	0.0641242	4.40814e-05	2.36875e-05	0.000660169	9.91146e-05	3.9381e-05	2.42691e-05	140.581	75.5423	2105.36	316.088	125.591	77.397	0.0161513	0.0023362	0.106867	0.307002	0.0079241	0.0224543	0.534056	0.108343	2.58073	-6.49196	5.22815	-3.84454
T1D	PAD	0.0878858	0.0344698	7.35839e-05	1.16713e-05	0.000132855	1.34961e-05	9.87854e-06	3.83858e-06	234.668	37.2212	423.691	43.0406	31.5038	12.2417	0.0344935	0.00188569	0.730821	0.162909	0.0639942	0.0195781	0.772118	0.0800678	0.231863	-8.84083	88.9187	79.846
T1D	Stroke	0.18923	0.0700044	5.03088e-05	1.31063e-05	0.000234175	2.5761e-05	3.31536e-05	1.2458e-05	160.441	41.7976	746.811	82.1548	105.731	39.7301	0.0427416	0.00248423	0.47166	0.193077	0.0924031	0.0275666	0.661019	0.0725375	3.38223	-5.69046	10.5746	1.50192
CD	AF	0.117694	0.0512516	0.000117123	2.04766e-05	0.0001091	2.65412e-05	1.53298e-05	7.41378e-06	373.519	65.3024	347.931	84.643	48.8887	23.6434	0.0204964	0.00307557	0.215006	0.219769	0.0214022	0.020134	0.571527	0.0754827	8.66302	-0.409669	186.778	177.706
CD	CAD	0.251443	0.0530768	4.50967e-05	1.90423e-05	0.000475378	3.81285e-05	8.73563e-05	1.90497e-05	143.819	60.7281	1516.04	121.596	278.589	60.7516	0.0316471	0.00318151	0.264402	0.050064	0.0828736	0.0135081	0.585299	0.0166214	31.0051	21.9324	22.4433	13.3706
CD	VTE	0.18901	0.0549409	0.000110938	2.14503e-05	7.6045e-05	2.20264e-05	2.15154e-05	6.44113e-06	353.793	68.4074	242.516	70.2447	68.6152	20.5415	0.000603376	0.00370383	0.578946	0.180786	0.102992	0.0165117	0.704203	0.0786576	24.2185	15.1458	140.397	131.324
CD	HF	0.166641	0.0782159	6.31555e-05	3.41324e-05	0.000630253	0.000100191	6.92975e-05	3.35978e-05	201.41	108.852	2009.95	319.522	220.998	107.147	0.0184179	0.00256721	0.0540577	0.17652	0.0130139	0.0252962	0.51739	0.0574181	7.65475	-1.41795	5.45448	-3.61821
CD	PAD	0.155592	0.0511658	0.000110839	1.9542e-05	0.00012112	1.4289e-05	2.16143e-05	7.87237e-06	353.478	62.3216	386.264	45.5694	68.9306	25.1059	0.00738216	0.00321974	0.697735	0.135129	0.104899	0.0262636	0.752572	0.06474	2.06873	-7.00396	127.033	117.961
CD	Stroke	0.165591	0.0979773	9.8804e-05	2.54772e-05	0.00023368	2.56012e-05	3.3649e-05	2.12859e-05	315.097	81.2497	745.231	81.6453	107.311	67.8832	0.0292252	0.00249678	0.331939	0.238209	0.041976	0.0195891	0.614491	0.0932925	7.03961	-2.03308	21.8243	12.7516
UC	AF	0.141228	0.0530282	0.000121185	1.3267e-05	0.000105644	2.48508e-05	1.87853e-05	7.7639e-06	386.473	42.3099	336.911	79.2522	59.9087	24.76	0.00953197	0.00302654	0.420969	0.211036	0.0524011	0.0168352	0.644213	0.0820097	7.14679	-1.9259	140.165	131.092
UC	CAD	0.172781	0.0447421	7.89499e-05	1.80539e-05	0.000501714	2.69578e-05	6.10205e-05	1.72556e-05	251.78	57.5761	1600.02	85.9717	194.602	55.0301	0.0263647	0.00376769	-0.196932	0.086487	-0.0394309	0.0136363	0.436641	0.0282399	19.0706	9.99792	30.2623	21.1896
UC	VTE	0.225843	0.0647023	0.000112912	9.48657e-06	7.05016e-05	2.09561e-05	2.70588e-05	9.02613e-06	360.088	30.2538	224.838	66.8315	86.2937	28.7854	-0.00890474	0.00325952	0.669127	0.16989	0.144999	0.0172988	0.741581	0.0753113	18.9988	9.92607	99.917	90.8443
UC	HF	0.0715706	0.0475115	0.000109389	2.03688e-05	0.000668969	9.3877e-05	3.05811e-05	2.18806e-05	348.855	64.9584	2133.42	299.385	97.5266	69.7799	0.00853093	0.00217953	0.0659136	0.373463	0.00391834	0.028168	0.519361	0.140337	1.06767	-8.00502	9.75235	0.679654
UC	PAD	0.0591043	0.024436	0.000131674	1.02405e-05	0.000134438	1.36376e-05	8.29628e-06	3.35956e-06	419.924	32.6582	428.737	43.4919	26.4578	10.714	0.0196791	0.00308958	-0.476446	0.475223	-0.0345129	0.0292917	0.325564	0.17312	-0.411353	-9.48404	125.648	116.576
UC	Stroke	0.202129	0.0375159	9.86297e-05	1.1914e-05	0.000225988	1.83224e-05	4.13407e-05	8.77621e-06	314.542	37.9953	720.702	58.4323	131.84	27.9883	0.0482541	0.00293495	-0.842826	0.107815	-0.17724	0.0301748	0.167624	0.0712599	0.521193	-8.5515	27.1335	18.0608
PSC	AF	0.124107	0.051389	1.78736e-05	1.03067e-05	0.000114998	2.66852e-05	9.43103e-06	4.03494e-06	57.0011	32.8691	366.743	85.1021	30.0766	12.8679	0.00633488	0.00326284	0.781445	0.179688	0.125425	0.0392074	0.803339	0.0933649	2.042	-7.03069	20.6114	11.5387
PSC	CAD	0.0531706	0.0300429	1.15715e-05	8.35119e-06	0.000547001	3.27448e-05	1.57331e-05	9.03711e-06	36.903	26.6329	1744.45	104.427	50.1747	28.8204	-0.000942547	0.00241565	-0.0696285	0.2448	-0.00949015	0.0259702	0.476613	0.0805289	7.00404	-2.06865	6.06892	-3.00377
PSC	VTE	0.170595	0.0998059	1.64905e-05	1.1099e-05	8.67462e-05	2.16016e-05	1.08142e-05	6.72757e-06	52.59	35.396	276.644	68.8901	34.4877	21.455	-0.00151829	0.00325386	-0.451454	0.257886	-0.0795968	0.0397077	0.34157	0.101115	12.8125	3.73981	31.6743	22.6016
PSC	HF	0.0411025	0.0264205	1.28188e-05	9.99368e-06	0.000685064	0.000100924	1.44859e-05	8.82065e-06	40.8806	31.871	2184.75	321.857	46.1971	28.1301	-0.00602976	0.00251456	0.143273	0.5596	0.0153911	0.0542781	0.553615	0.211602	1.08116	-7.99153	1.76722	-7.30547
PSC	PAD	0.0719117	0.0407087	2.11689e-05	1.0132e-05	0.000136598	1.28778e-05	6.13579e-06	3.56776e-06	67.51	32.3121	435.627	41.0688	19.5678	11.378	0.00127496	0.00282017	-0.300815	0.404546	-0.0295719	0.0371765	0.394915	0.143856	1.39695	-7.67574	8.8971	-0.175595
PSC	Stroke	0.0722599	0.027202	1.66709e-05	1.04871e-05	0.000256695	2.23613e-05	1.06337e-05	4.21772e-06	53.1655	33.4447	818.63	71.3127	33.9122	13.4508	0.0390621	0.0020625	-0.770578	0.241572	-0.0995805	0.0513773	0.193366	0.117554	-0.333854	-9.40655	3.09904	-5.97365

## Sheet: Supplementary Table 4
Supplementary Table 4. Univariate LAVA results for each six autoimmune diseases and six cardiovascular diseases
Note: results of univariate LAVA analysis, testing for local genetic signal within each trait in 2,495 regions. Tests are one-sided. Regions with a P-value < 0.0001 were deemed to harbor sufficient genetic signal for meaningful local genetic correlation estimation with other traits. locus = index of given local genomic regions; chr = chromosome; start/stop = start and end position of locus in bas…
P-values lower than 1e-04 are considered significant and marked in dark yellow.
locus	chr	start	stop	n.snps	n.pcs	Trait	h2.obs	p
16	1	14720132	15755230	1656	248	RA	0.00101398	1.92551e-05
19	1	17557747	18427820	1421	170	RA	0.00082296	8.65424e-05
40	1	43512670	45167235	1855	194	RA	0.00114099	3.04894e-07
88	1	101188316	102424611	1938	177	RA	0.00123672	7.85501e-08
99	1	112489249	113418037	1062	156	RA	0.000991737	1.32433e-06
100	1	113418038	114664387	1303	141	RA	0.0103695	2.84997e-198
114	1	156813846	158081627	1888	194	RA	0.00135168	4.37836e-09
118	1	161054077	161945442	1249	116	RA	0.000817405	2.69571e-06
122	1	164726580	165553812	1398	192	RA	0.00111265	1.26848e-06
130	1	172465154	173582511	1177	145	RA	0.00218576	2.11722e-19
154	1	200134006	201067952	1319	143	RA	0.00111484	2.89914e-08
155	1	201067953	202583884	2063	270	RA	0.00120837	2.14545e-06
156	1	202583885	204092537	1909	227	RA	0.00135709	2.65937e-08
159	1	205917549	208162951	1772	194	RA	0.00128109	2.48543e-08
160	1	208162952	209711169	2023	269	RA	0.00106608	1.36486e-05
179	1	230227248	231287764	2188	246	RA	0.000901187	3.68182e-05
217	2	11995766	12732506	1218	202	RA	0.00109241	9.27992e-07
245	2	40786177	41540439	1164	116	RA	0.000675796	4.47947e-05
250	2	45189469	45850047	1030	190	RA	0.00128264	3.58715e-09
268	2	60775067	62429910	1887	190	RA	0.00109415	9.41092e-07
271	2	64696090	65938002	1707	198	RA	0.00136563	6.46768e-09
284	2	78080058	79019676	1475	113	RA	0.000729431	1.51368e-05
296	2	98989361	100202436	1405	111	RA	0.000754599	7.81776e-06
297	2	100202437	101556799	2027	163	RA	0.00181066	9.64409e-15
305	2	110097869	112644828	1521	157	RA	0.00116313	1.9811e-08
306	2	112644829	113930668	1667	160	RA	0.000762516	9.22817e-05
312	2	119635490	121073752	2031	188	RA	0.00113408	1.11779e-07
314	2	122026818	123219243	1644	121	RA	0.000533685	3.37826e-05
334	2	143259781	144503688	1495	139	RA	0.000712157	9.81233e-05
360	2	174927564	176734750	2283	205	RA	0.00111253	1.62717e-06
378	2	198140351	199654969	1216	100	RA	0.00082406	1.27281e-06
382	2	203639687	205038119	1526	124	RA	0.00254758	6.77137e-27
384	2	206821200	207726594	1251	150	RA	0.000729368	6.85888e-05
408	2	231847387	233352722	2054	185	RA	0.000822429	9.72828e-05
424	3	2140012	3128152	1703	269	RA	0.00098306	3.5686e-05
448	3	27614909	28649810	1308	138	RA	0.00153898	1.15407e-12
474	3	61277588	62609818	1663	256	RA	0.00124179	6.45652e-07
482	3	69784970	71223281	1460	192	RA	0.000972761	1.2316e-05
511	3	104878978	106174685	1929	165	RA	0.00106214	1.47263e-07
512	3	106174686	107736519	2064	210	RA	0.000923431	2.20215e-05
539	3	133718494	135288394	2100	231	RA	0.00104703	1.24415e-05
540	3	135288395	137372141	1983	149	RA	0.000779579	1.5042e-05
561	3	159478752	160584961	1435	108	RA	0.000878122	7.13209e-07
624	4	25832019	27385580	1579	216	RA	0.00244556	2.31874e-20
629	4	30455556	31395092	1831	132	RA	0.000692946	8.29521e-05
639	4	38984839	39820061	1187	121	RA	0.000691968	7.44867e-05
692	4	102544804	104384534	2244	175	RA	0.00194835	2.24429e-15
727	4	139553761	141087047	1701	224	RA	0.00103359	1.40444e-05
785	5	9203856	10549029	1887	249	RA	0.00123574	1.11495e-06
794	5	20397014	21211399	1005	66	RA	0.000640542	5.03142e-06
803	5	30416067	31679464	1887	223	RA	0.000921643	4.70656e-05
806	5	33971057	35157146	1678	159	RA	0.00095962	3.43919e-06
815	5	45305567	46388848	931	19	RA	0.000445073	2.47057e-06
822	5	55221399	55968966	1259	201	RA	0.00356862	2.52254e-34
864	5	106389389	107265911	1340	181	RA	0.000905007	1.81057e-05
883	5	126054698	126992836	1535	95	RA	0.000704224	1.25863e-05
892	5	139408117	141253830	1954	212	RA	0.000969129	3.03765e-05
907	5	157191082	158484775	1875	203	RA	0.00127099	5.81929e-08
908	5	158484776	159663733	1711	190	RA	0.00141969	5.19533e-10
913	5	163781269	165289211	2056	226	RA	0.00105539	8.54737e-06
915	5	166863414	168342743	1768	261	RA	0.00136545	4.62196e-07
919	5	172285683	173606995	1989	240	RA	0.0010359	9.3377e-06
921	5	174662886	176180301	1524	215	RA	0.00122267	2.54569e-07
923	5	177659903	178595252	172	102	RA	0.000714381	2.59574e-05
931	6	5378214	6621937	1948	266	RA	0.00125479	8.93526e-07
947	6	23192338	23939306	1310	148	RA	0.000860861	7.44964e-06
948	6	23939307	24950379	1909	204	RA	0.00120889	7.47975e-08
949	6	24950380	25684629	1684	158	RA	0.00174021	6.85689e-15
954	6	29529756	29833843	242	31	RA	0.00625266	5.55258e-139
956	6	30070718	30715006	31	17	RA	0.00206145	5.1999e-38
958	6	31106494	31250556	183	34	RA	0.0120477	2.15513e-258
959	6	31250557	31320268	85	16	RA	0.00473395	8.26057e-94
961	6	31427210	32208901	589	104	RA	0.0535826	0
965	6	32586785	32629239	29	13	RA	0.0680314	0
966	6	32629240	32682213	32	8	RA	0.0149836	0
968	6	32897999	33194975	293	60	RA	0.0224093	0
969	6	33194976	33864262	1104	143	RA	0.0163377	0
970	6	33864263	34979270	1570	143	RA	0.00309693	9.98286e-36
971	6	34979271	36346353	1733	176	RA	0.00144443	7.12284e-10
978	6	43770627	44596897	1127	220	RA	0.00128461	4.5248e-08
1026	6	93696826	95176337	2355	198	RA	0.000851618	8.76514e-05
1043	6	113705004	115062811	1527	163	RA	0.000815633	8.61052e-05
1063	6	137553213	138825721	2124	203	RA	0.00443536	6.63745e-52
1073	6	150635316	151629954	2058	232	RA	0.00107035	2.30394e-06
1082	6	158952061	159604052	1249	121	RA	0.00105047	2.61176e-08
1089	6	165835954	166853325	139	100	RA	0.000651413	6.66089e-05
1090	6	166853326	167714865	187	115	RA	0.00197001	7.77932e-20
1113	7	13676748	15013694	1970	240	RA	0.00118289	1.37673e-06
1116	7	16739014	17596578	1368	238	RA	0.00115408	1.25419e-06
1124	7	24894120	25671575	1357	190	RA	0.000927354	1.4724e-05
1126	7	27351287	28890886	2131	252	RA	0.00186625	1.54733e-11
1127	7	28890887	30175113	2175	241	RA	0.00104634	7.03259e-06
1134	7	36507691	37981936	2172	249	RA	0.000989833	6.05239e-05
1143	7	47253455	48363585	1704	220	RA	0.000935053	3.9367e-05
1146	7	49632427	50894508	2114	170	RA	0.00121131	2.34866e-08
1162	7	67474723	68569224	2410	196	RA	0.00110974	6.98487e-07
1233	8	660415	1161824	1005	169	RA	0.000804922	8.43963e-05
1263	8	18668610	19488888	1628	228	RA	0.00101932	1.2881e-05
1274	8	28344177	29744540	1516	189	RA	0.000894674	2.93546e-05
1304	8	68683824	70004665	2076	225	RA	0.00100087	2.94562e-05
1314	8	79756170	81340231	2281	198	RA	0.00139176	9.97411e-09
1330	8	101448440	102548680	1326	185	RA	0.00130877	1.41931e-08
1351	8	125453323	126766827	1831	219	RA	0.000941207	1.92145e-05
1355	8	130383564	131545725	1980	175	RA	0.000931182	8.67201e-06
1356	8	131545726	132534636	1781	180	RA	0.00113148	2.94256e-07
1358	8	133461552	134509448	1697	218	RA	0.00158462	2.15849e-10
1377	9	4596615	5437591	1144	148	RA	0.000779526	6.69584e-05
1381	9	8262304	9170120	1885	220	RA	0.00112002	1.61448e-06
1388	9	13512853	14244747	1275	196	RA	0.00098693	7.03456e-06
1411	9	33194893	34704544	1905	135	RA	0.000803558	1.20823e-05
1412	9	34704545	36749273	2294	245	RA	0.00133164	5.19827e-08
1413	9	36749274	37687112	1219	177	RA	0.000964865	4.37367e-06
1467	9	122677720	124119883	1335	158	RA	0.000855465	1.72422e-05
1472	9	128785783	129617771	1166	209	RA	0.00111107	1.86634e-06
1486	10	1329233	1872960	993	168	RA	0.00114635	1.91405e-07
1492	10	5396243	6234718	1564	225	RA	0.00223703	3.40946e-17
1494	10	6897038	7659872	1457	208	RA	0.000894257	5.9948e-05
1500	10	12581572	13208061	1088	185	RA	0.000900093	1.87853e-05
1520	10	30919470	32457293	2011	175	RA	0.000930329	8.93611e-06
1544	10	62626466	64069687	2051	188	RA	0.00164793	2.98935e-12
1545	10	64069688	65400431	1999	150	RA	0.00125482	3.10285e-09
1567	10	87287936	88443652	1790	180	RA	0.00114517	2.63554e-07
1568	10	88443653	89971628	1504	187	RA	0.000866274	7.68467e-05
1597	10	123856185	124894142	1740	211	RA	0.00148063	3.42123e-10
1598	10	124894143	125798319	1685	216	RA	0.00111291	4.10828e-07
1601	10	127997709	129134738	1379	206	RA	0.00129648	4.74786e-08
1603	10	129831970	130694008	1494	237	RA	0.00141009	1.10859e-08
1613	11	2477450	3362508	893	196	RA	0.000966825	1.35641e-05
1624	11	11632651	12470449	1511	229	RA	0.00106524	5.22818e-06
1648	11	35500368	36331189	1126	173	RA	0.000846883	1.55268e-05
1649	11	36331190	37119024	1345	124	RA	0.000938197	6.28933e-07
1671	11	60515106	61717117	1149	158	RA	0.00122105	9.55183e-09
1701	11	94384536	95327210	1186	160	RA	0.00119853	2.59306e-08
1723	11	117295642	118901213	2333	262	RA	0.00119429	2.21842e-06
1726	11	121208187	122589224	1719	204	RA	0.00103395	2.80016e-06
1733	11	128262551	129451784	1005	197	RA	0.00195449	5.62421e-14
1789	12	50344347	51769419	1598	76	RA	0.000701158	3.2873e-06
1793	12	55416803	56987105	1451	117	RA	0.000741725	2.51544e-05
1805	12	70097806	71177961	2097	161	RA	0.000804423	6.5346e-05
1838	12	108183189	109031819	1396	139	RA	0.000799372	9.5638e-06
1843	12	114685671	115439451	1287	177	RA	0.000858337	5.05189e-06
1872	13	27392006	28587125	2095	225	RA	0.0013395	3.10795e-08
1874	13	30068526	31433218	2289	239	RA	0.00176233	2.02349e-12
1884	13	41003944	42037054	1069	105	RA	0.000664166	3.65186e-05
1932	13	91764205	93285142	2035	162	RA	0.000920635	9.10032e-06
1941	13	103050418	104378435	2319	223	RA	0.000947806	1.8921e-05
1945	13	107037865	108521978	2069	276	RA	0.00110405	2.8418e-05
1966	14	33591114	34695195	1521	298	RA	0.00125733	1.51596e-06
1992	14	60099483	61652816	1463	86	RA	0.000593394	4.77486e-05
1993	14	61652817	62717985	1483	205	RA	0.000919234	6.61478e-05
1999	14	68976913	69794542	1352	197	RA	0.000835308	7.97193e-05
2011	14	82524786	84087372	2532	227	RA	0.00111392	1.27907e-06
2016	14	88208596	89482883	1976	149	RA	0.000841093	1.78981e-05
2018	14	90662837	92101228	2021	194	RA	0.000909066	3.72677e-05
2019	14	92101229	93386328	2071	236	RA	0.00111788	2.5594e-06
2022	14	95946793	97174314	2064	242	RA	0.00106394	7.33244e-06
2025	14	98885323	99474533	1329	149	RA	0.000721837	9.44381e-05
2055	15	47693317	49260006	1579	160	RA	0.000937301	2.79824e-06
2072	15	69089816	70767983	2033	250	RA	0.00272655	1.27724e-20
2083	15	82191078	84209760	1776	193	RA	0.000895638	5.01494e-05
2093	15	93707011	94565521	1553	240	RA	0.00107027	6.66774e-06
2126	16	26154123	27443061	2039	275	RA	0.00151604	5.2658e-08
2128	16	29043178	31384210	1119	116	RA	0.000901194	7.74086e-07
2150	16	72089512	73140781	1192	165	RA	0.000931739	3.75273e-06
2166	16	84440155	85146805	1647	256	RA	0.00100242	1.74719e-05
2167	16	85146806	86058597	1018	230	RA	0.00154029	6.66196e-10
2168	16	86058598	86748867	1507	283	RA	0.00133397	1.20689e-07
2175	17	1480057	2699135	1278	199	RA	0.000829316	8.71418e-05
2177	17	3430441	4463971	1264	169	RA	0.0015116	3.26369e-11
2178	17	4463972	5573784	1768	163	RA	0.00114484	4.78142e-08
2179	17	5573785	6305078	1325	202	RA	0.000875007	3.96694e-05
2184	17	10572618	11778164	1503	199	RA	0.000983981	3.49935e-06
2195	17	25872111	27344401	1150	183	RA	0.00086191	6.58653e-05
2206	17	42348004	43460500	1218	140	RA	0.000708142	8.66765e-05
2218	17	58652810	60453120	1236	155	RA	0.000937394	3.92359e-06
2244	18	5575813	6756496	1526	248	RA	0.00147868	7.93704e-09
2246	18	7862480	8788524	1569	198	RA	0.000889684	4.52123e-05
2293	18	65294196	66407960	2128	184	RA	0.000948622	9.58134e-06
2312	19	4741719	5478684	1036	191	RA	0.0011915	8.63378e-08
2313	19	5478685	6455428	1473	147	RA	0.000899713	3.89797e-06
2314	19	6455429	7249359	1236	188	RA	0.00085044	4.90656e-05
2318	19	10028841	11681978	2015	224	RA	0.00424884	4.43793e-42
2327	19	18504868	19749166	1296	129	RA	0.000903116	1.17811e-06
2351	19	45040933	45893307	912	148	RA	0.00085387	1.35549e-05
2358	19	51259179	51903804	879	167	RA	0.00084079	2.99652e-05
2375	20	5379451	6128358	1222	170	RA	0.000911143	1.35969e-05
2380	20	10279604	11257012	1540	187	RA	0.00123223	1.00842e-07
2390	20	18959420	19957928	1639	208	RA	0.000880495	8.22912e-05
2415	20	51533751	52411532	954	199	RA	0.000836083	9.44914e-05
2435	21	19479025	20407307	1590	183	RA	0.00104431	2.92188e-06
2449	21	34383795	35729261	1687	235	RA	0.00179211	5.90051e-11
2455	21	41344743	42187152	1487	183	RA	0.000939422	8.34498e-06
2482	22	37364005	38718589	1759	225	RA	0.00143073	5.8182e-09
10	1	7711795	8580987	1191	156	RA	0.000791723	1.3455e-05
19	1	17557747	18427820	1422	171	RA	0.00082043	9.06656e-05
26	1	23907046	25885138	2026	216	RA	0.00120466	4.58079e-07
58	1	67761891	68633860	1138	152	RA	0.000796985	2.64094e-05
88	1	101188316	102424611	1938	177	RA	0.00123672	7.85501e-08
95	1	107874654	109271449	1915	180	RA	0.000814358	8.68353e-05
99	1	112489249	113418037	1063	156	RA	0.000985435	1.55737e-06
100	1	113418038	114664387	1303	141	RA	0.0103695	2.84997e-198
101	1	114664388	116207297	2423	213	RA	0.00122922	1.22806e-07
113	1	154685546	156813845	1632	204	RA	0.00124289	4.57691e-08
118	1	161054077	161945442	1249	116	RA	0.000817405	2.69571e-06
125	1	167163955	168179086	1273	173	RA	0.00157487	7.60664e-12
154	1	200134006	201067952	1321	143	RA	0.001112	2.91189e-08
156	1	202583885	204092537	1909	227	RA	0.00135709	2.65937e-08
160	1	208162952	209711169	2024	269	RA	0.00104536	1.78321e-05
185	1	235097114	236199671	1082	113	RA	0.00118601	9.12189e-10
232	2	29627933	30575619	1423	174	RA	0.00115847	1.34953e-07
268	2	60775067	62429910	1889	190	RA	0.00108921	1.04316e-06
286	2	79900056	80737811	1117	200	RA	0.000869177	1.94122e-05
290	2	84395900	85992794	2191	192	RA	0.000902076	2.61054e-05
296	2	98989361	100202436	1405	111	RA	0.000754599	7.81776e-06
301	2	105120579	106546524	2241	236	RA	0.0013084	6.6539e-08
306	2	112644829	113930668	1668	160	RA	0.000812046	4.08586e-05
314	2	122026818	123219243	1644	121	RA	0.000533685	3.37826e-05
340	2	152497376	153999309	2176	164	RA	0.00115724	4.86921e-08
360	2	174927564	176734750	2287	205	RA	0.00109255	2.3523e-06
378	2	198140351	199654969	1216	100	RA	0.00082406	1.27281e-06
382	2	203639687	205038119	1528	124	RA	0.00255764	5.05769e-27
399	2	222327714	223353965	1201	152	RA	0.000784431	8.40981e-05
423	3	1440049	2140011	1751	201	RA	0.000974252	7.16457e-06
424	3	2140012	3128152	1704	269	RA	0.000978113	3.84159e-05
431	3	8664893	9970731	1618	262	RA	0.00101446	4.83569e-05
448	3	27614909	28649810	1308	138	RA	0.00153898	1.15407e-12
478	3	65326752	66702084	1747	230	RA	0.00103677	7.21431e-06
482	3	69784970	71223281	1469	193	RA	0.00102576	4.93833e-06
483	3	71223282	72334704	1428	258	RA	0.00102096	4.36628e-05
511	3	104878978	106174685	1929	165	RA	0.00106214	1.47263e-07
519	3	113657666	115649909	2064	239	RA	0.0010551	1.17259e-05
561	3	159478752	160584961	1435	108	RA	0.000878122	7.13209e-07
610	4	10370667	11050119	1249	134	RA	0.000708807	6.82167e-05
629	4	30455556	31395092	1831	132	RA	0.000692946	8.29521e-05
638	4	37880861	38984838	1986	244	RA	0.00104777	1.35381e-05
639	4	38984839	39820061	1187	121	RA	0.000691968	7.44867e-05
645	4	43962562	45186767	2350	147	RA	0.00119891	1.37663e-08
692	4	102544804	104384534	2243	175	RA	0.00194754	2.16517e-15
786	5	10549030	11850850	1921	219	RA	0.00100979	1.2933e-05
791	5	16592320	17803477	1528	204	RA	0.000980537	9.40861e-06
803	5	30416067	31679464	1889	223	RA	0.000913229	5.30075e-05
815	5	45305567	46388848	931	19	RA	0.000445073	2.47057e-06
839	5	75959516	77290255	2017	234	RA	0.000906884	6.01972e-05
868	5	110819518	111983115	1948	176	RA	0.00080044	7.21163e-05
883	5	126054698	126992836	1559	96	RA	0.00068463	2.17636e-05
892	5	139408117	141253830	1957	213	RA	0.000954243	3.62066e-05
913	5	163781269	165289211	2056	226	RA	0.00105539	8.54737e-06
916	5	168342744	169506966	1975	231	RA	0.000922761	8.27494e-05
920	5	173606996	174662885	1719	241	RA	0.00149647	1.63902e-09
921	5	174662886	176180301	1524	215	RA	0.00122267	2.54569e-07
926	6	63979	1380679	1844	258	RA	0.00192858	7.86287e-13
931	6	5378214	6621937	1949	267	RA	0.00125219	9.47693e-07
947	6	23192338	23939306	1323	149	RA	0.000859989	8.19263e-06
952	6	27261036	28666364	2015	83	RA	0.00368739	2.37081e-54
953	6	28666365	29529755	199	47	RA	0.00372151	4.28937e-65
956	6	30070718	30715006	31	17	RA	0.00206145	5.1999e-38
957	6	30715007	31106493	251	61	RA	0.0176308	0
959	6	31250557	31320268	85	16	RA	0.00473395	8.26057e-94
960	6	31320269	31427209	243	36	RA	0.0140441	1.72147e-306
965	6	32586785	32629239	29	13	RA	0.0680314	0
967	6	32682214	32897998	319	51	RA	0.0474097	0
968	6	32897999	33194975	293	60	RA	0.0224093	0
969	6	33194976	33864262	1104	143	RA	0.0163165	0
971	6	34979271	36346353	1735	176	RA	0.00144685	7.24596e-10
972	6	36346354	37570051	1956	225	RA	0.00182851	3.83547e-13
980	6	45408422	46430701	1322	156	RA	0.000965376	2.19444e-06
1022	6	89974268	91097024	1307	173	RA	0.000953442	5.32762e-06
1026	6	93696826	95176337	2355	198	RA	0.000851618	8.76514e-05
1063	6	137553213	138825721	2124	203	RA	0.00443536	6.63745e-52
1067	6	143083348	144791455	2046	244	RA	0.00142108	6.85181e-09
1073	6	150635316	151629954	2059	233	RA	0.00106938	2.57517e-06
1082	6	158952061	159604052	1249	121	RA	0.00105047	2.61176e-08
1089	6	165835954	166853325	139	100	RA	0.000651413	6.66089e-05
1090	6	166853326	167714865	187	115	RA	0.00197001	7.77932e-20
1113	7	13676748	15013694	1970	240	RA	0.00118289	1.37673e-06
1124	7	24894120	25671575	1358	190	RA	0.000881853	3.29753e-05
1125	7	25671576	27351286	2413	223	RA	0.000949099	2.28019e-05
1137	7	40261241	41415925	1148	128	RA	0.000711097	5.2969e-05
1146	7	49632427	50894508	2114	170	RA	0.00121131	2.34866e-08
1169	7	77663965	78685009	2056	218	RA	0.0010153	5.36912e-06
1207	7	127903739	128779173	1477	120	RA	0.00127651	2.46942e-11
1208	7	128779174	130418704	2149	212	RA	0.00127269	5.32675e-08
1250	8	10478852	11466761	1691	195	RA	0.0013553	5.21262e-09
1269	8	23788495	24863243	1455	131	RA	0.000763341	3.83989e-05
1274	8	28344177	29744540	1516	189	RA	0.000894674	2.93546e-05
1276	8	31134787	32454962	2423	183	RA	0.00100681	4.93587e-06
1304	8	68683824	70004665	2075	225	RA	0.00103063	1.78486e-05
1307	8	72013185	72917489	1414	197	RA	0.00176908	4.77799e-13
1330	8	101448440	102548680	1348	186	RA	0.00130535	1.43003e-08
1337	8	108647464	109920827	1968	138	RA	0.000825458	1.00743e-07
1351	8	125453323	126766827	1831	219	RA	0.000941207	1.92145e-05
1353	8	128073655	129291118	1954	272	RA	0.00240289	2.8185e-17
1355	8	130383564	131545725	1983	175	RA	0.000952949	6.24194e-06
1358	8	133461552	134509448	1697	218	RA	0.00158462	2.15849e-10
1378	9	5437592	6859791	1978	224	RA	0.00130943	1.00678e-08
1381	9	8262304	9170120	1887	221	RA	0.00110722	1.75866e-06
1388	9	13512853	14244747	1275	196	RA	0.00098693	7.03456e-06
1411	9	33194893	34704544	1908	136	RA	0.000787486	1.73917e-05
1412	9	34704545	36749273	2299	246	RA	0.00130549	8.17787e-08
1424	9	78630916	79451035	1381	216	RA	0.000917099	3.32365e-05
1461	9	116159541	117054909	1391	192	RA	0.00106173	2.00592e-06
1470	9	126092932	127184582	1529	162	RA	0.00096266	2.36241e-06
1487	10	1872961	2637065	2055	189	RA	0.000873994	2.89836e-05
1493	10	6234719	6897037	1061	183	RA	0.00145959	3.79062e-10
1496	10	8771921	10081279	2149	171	RA	0.000825445	9.8683e-05
1500	10	12581572	13208061	1092	186	RA	0.000859517	3.6891e-05
1512	10	24489448	25577761	1295	204	RA	0.00130012	8.60338e-08
1552	10	71050505	71672997	1242	210	RA	0.000897784	4.094e-05
1561	10	81763231	82378048	1188	103	RA	0.00112303	4.22022e-10
1567	10	87287936	88443652	1794	180	RA	0.00113286	3.12197e-07
1601	10	127997709	129134738	1379	206	RA	0.00129648	4.74786e-08
1613	11	2477450	3362508	898	196	RA	0.000999685	7.58532e-06
1624	11	11632651	12470449	1512	230	RA	0.00102735	1.00073e-05
1649	11	36331190	37119024	1346	124	RA	0.000965153	3.53691e-07
1671	11	60515106	61717117	1150	159	RA	0.00121804	1.11999e-08
1677	11	68887345	69713996	1222	170	RA	0.000865869	1.46365e-05
1699	11	92209169	93576641	1705	163	RA	0.000889	1.087e-05
1723	11	117295642	118901213	2334	262	RA	0.00123331	1.26028e-06
1724	11	118901214	120064528	1514	195	RA	0.000836297	7.04767e-05
1726	11	121208187	122589224	1719	204	RA	0.00103395	2.80016e-06
1733	11	128262551	129451784	1005	197	RA	0.00195449	5.62421e-14
1789	12	50344347	51769419	1598	76	RA	0.000701158	3.2873e-06
1841	12	111592382	113947983	2171	168	RA	0.00105306	8.28232e-07
1843	12	114685671	115439451	1288	177	RA	0.000863426	4.50231e-06
1844	12	115439452	116197675	1206	199	RA	0.000967717	1.84404e-05
1873	13	28587126	30068525	2072	200	RA	0.000891587	4.72789e-05
1883	13	40091624	41003943	1359	185	RA	0.00123743	9.46497e-08
1884	13	41003944	42037054	1069	105	RA	0.000664166	3.65186e-05
1915	13	75882385	76671493	1389	147	RA	0.000844956	1.44902e-05
1932	13	91764205	93285142	2035	162	RA	0.000920635	9.10032e-06
1941	13	103050418	104378435	2326	224	RA	0.000937208	2.23844e-05
1945	13	107037865	108521978	2069	276	RA	0.00110405	2.8418e-05
1958	14	23985937	24906056	1021	154	RA	0.00080558	3.02537e-05
1989	14	57460782	58447798	1452	148	RA	0.00084426	7.36443e-06
1993	14	61652817	62717985	1489	205	RA	0.000925714	5.85598e-05
1998	14	67891840	68976912	1396	128	RA	0.000825002	6.16929e-06
2011	14	82524786	84087372	2534	227	RA	0.00110064	1.55851e-06
2018	14	90662837	92101228	2021	194	RA	0.000909066	3.72677e-05
2021	14	94892241	95946792	2068	285	RA	0.00158653	8.89306e-09
2022	14	95946793	97174314	2065	242	RA	0.00110802	3.34217e-06
2023	14	97174315	98268391	1577	191	RA	0.000903968	3.09444e-05
2025	14	98885323	99474533	1332	150	RA	0.000826398	1.72584e-05
2042	15	30604120	32177320	1511	174	RA	0.000855958	2.95259e-05
2055	15	47693317	49260006	1595	160	RA	0.000921011	3.88508e-06
2081	15	79998207	81077025	1720	230	RA	0.00111784	1.12554e-06
2083	15	82191078	84209760	1778	194	RA	0.000897557	5.04454e-05
2093	15	93707011	94565521	1554	240	RA	0.00108303	4.97994e-06
2115	16	11022543	11916631	1654	181	RA	0.00154523	1.7073e-11
2126	16	26154123	27443061	2043	275	RA	0.00174116	1.05653e-09
2158	16	78280637	78973580	1878	251	RA	0.000980416	1.70021e-05
2165	16	83778372	84440154	1684	269	RA	0.00136864	9.5351e-08
2166	16	84440155	85146805	1648	257	RA	0.0010214	1.26827e-05
2168	16	86058598	86748867	1507	283	RA	0.00133397	1.20689e-07
2179	17	5573785	6305078	1327	203	RA	0.000909667	2.0709e-05
2198	17	31318754	32356061	1719	236	RA	0.00104904	6.13219e-06
2203	17	37361179	38880481	1531	109	RA	0.000834079	1.69286e-06
2210	17	47516225	48722590	1210	240	RA	0.00106074	5.29472e-06
2228	17	71466954	72383472	1359	248	RA	0.000977147	4.21719e-05
2231	17	74908267	75619256	1225	190	RA	0.00098707	3.82245e-06
2244	18	5575813	6756496	1527	248	RA	0.00150727	4.8473e-09
2247	18	8788525	9816164	1940	241	RA	0.000924543	8.15531e-05
2262	18	28792735	30401128	2145	198	RA	0.0011454	3.42443e-07
2298	18	70540350	71491860	1587	195	RA	0.00107142	2.33507e-06
2313	19	5478685	6455428	1472	146	RA	0.000856498	8.94082e-06
2324	19	16079007	17045963	1240	118	RA	0.000929311	5.82153e-07
2327	19	18504868	19749166	1296	129	RA	0.000903116	1.17811e-06
2328	19	19749167	20485499	1215	85	RA	0.000671205	1.26348e-05
2342	19	35649344	36638122	1303	189	RA	0.000992956	1.04139e-05
2351	19	45040933	45893307	911	148	RA	0.000897165	5.88044e-06
2358	19	51259179	51903804	879	167	RA	0.00084079	2.99652e-05
2365	19	55714086	56411086	148	104	RA	0.000703015	1.60963e-05
2374	20	4591848	5379450	1200	165	RA	0.000862435	1.38957e-05
2375	20	5379451	6128358	1222	170	RA	0.000911143	1.35969e-05
2380	20	10279604	11257012	1544	187	RA	0.00118771	2.51954e-07
2415	20	51533751	52411532	954	199	RA	0.000836083	9.44914e-05
2419	20	54743695	55448075	1112	182	RA	0.00127064	1.98218e-08
2435	21	19479025	20407307	1591	183	RA	0.00104448	2.91357e-06
2447	21	32202240	33270272	1578	174	RA	0.000806481	4.34614e-05
2449	21	34383795	35729261	1687	235	RA	0.00179211	5.90051e-11
2450	21	35729262	37303548	2177	238	RA	0.00169246	1.50717e-10
2483	22	38718590	40378783	1809	194	RA	0.00203045	1.19421e-15
19	1	17557747	18427820	1357	162	RA	0.000843268	3.77448e-05
26	1	23907046	25885138	1949	209	RA	0.00111925	1.52765e-06
34	1	35201627	36855139	979	103	RA	0.000692572	1.62244e-05
35	1	36855140	38474036	2112	220	RA	0.000955182	3.61918e-05
36	1	38474037	40200950	2150	216	RA	0.00114844	9.97718e-07
40	1	43512670	45167235	1762	189	RA	0.00116483	1.67194e-07
57	1	66778016	67761890	1467	136	RA	0.0012711	1.71435e-09
58	1	67761891	68633860	1082	147	RA	0.000796574	3.19777e-05
97	1	110224231	111134062	996	167	RA	0.000812288	6.05243e-05
118	1	161054077	161945442	1214	113	RA	0.000816358	1.9598e-06
130	1	172465154	173582511	1156	141	RA	0.00219274	1.33323e-19
160	1	208162952	209711169	1967	263	RA	0.0012093	1.6518e-06
217	2	11995766	12732506	1165	198	RA	0.00107631	1.31959e-06
232	2	29627933	30575619	1305	162	RA	0.00115616	5.71533e-08
245	2	40786177	41540439	1121	112	RA	0.000696472	2.36058e-05
268	2	60775067	62429910	1778	185	RA	0.00131351	1.08327e-08
271	2	64696090	65938002	1629	187	RA	0.00140835	1.78208e-09
275	2	68877775	70756283	2324	213	RA	0.00175615	8.47827e-13
286	2	79900056	80737811	1071	191	RA	0.000883112	1.99735e-05
297	2	100202437	101556799	1955	156	RA	0.00174542	2.62311e-14
302	2	106546525	107412295	1368	153	RA	0.000817863	1.52133e-05
304	2	108417774	110097868	2010	166	RA	0.00114932	5.48095e-08
306	2	112644829	113930668	1609	152	RA	0.00080975	3.77798e-05
312	2	119635490	121073752	1956	181	RA	0.00115328	5.15764e-08
340	2	152497376	153999309	2140	158	RA	0.00107444	2.66624e-07
374	2	191051955	193033982	2185	201	RA	0.00224866	7.39608e-19
384	2	206821200	207726594	1217	144	RA	0.000768794	3.08216e-05
408	2	231847387	233352722	1996	181	RA	0.000846496	6.17471e-05
423	3	1440049	2140011	1643	196	RA	0.00094921	1.02512e-05
425	3	3128153	4109393	1830	228	RA	0.000955902	2.53955e-05
448	3	27614909	28649810	1260	130	RA	0.00128873	2.87366e-10
461	3	42301658	44141693	2168	224	RA	0.000918314	2.9442e-05
478	3	65326752	66702084	1702	225	RA	0.00108084	2.67542e-06
539	3	133718494	135288394	1968	224	RA	0.00092522	7.35392e-05
540	3	135288395	137372141	1880	144	RA	0.000775848	1.60244e-05
561	3	159478752	160584961	1390	102	RA	0.000711492	2.85158e-05
584	3	186602046	187939199	1910	266	RA	0.00167389	1.06037e-09
603	4	5972710	7135819	1688	270	RA	0.00101852	2.66946e-05
626	4	28177793	28927438	1399	91	RA	0.000629863	4.67147e-05
638	4	37880861	38984838	1904	237	RA	0.00115081	2.51633e-06
645	4	43962562	45186767	2289	141	RA	0.00104741	2.93806e-07
764	4	181122434	182065646	1644	226	RA	0.000827627	8.24216e-05
781	5	4636543	5828694	2014	229	RA	0.00124434	1.51126e-07
794	5	20397014	21211399	953	65	RA	0.000640942	4.49635e-06
815	5	45305567	46388848	917	19	RA	0.00044824	2.26863e-06
822	5	55221399	55968966	1204	194	RA	0.0034718	1.48168e-33
839	5	75959516	77290255	1907	226	RA	0.000924623	5.73175e-05
883	5	126054698	126992836	1221	95	RA	0.00067299	3.0767e-05
892	5	139408117	141253830	1825	201	RA	0.00100454	7.43415e-06
907	5	157191082	158484775	1825	197	RA	0.00134093	1.20345e-08
908	5	158484776	159663733	1656	185	RA	0.00135467	2.03438e-09
918	5	170898341	172285682	1793	262	RA	0.00114258	3.22728e-06
919	5	172285683	173606995	1932	234	RA	0.00123204	2.36271e-07
920	5	173606996	174662885	1660	235	RA	0.00143474	2.71023e-09
921	5	174662886	176180301	1480	211	RA	0.00126425	8.7162e-08
923	5	177659903	178595252	169	101	RA	0.000698842	3.25799e-05
926	6	63979	1380679	1754	251	RA	0.00167276	1.38431e-10
931	6	5378214	6621937	1869	259	RA	0.00123696	7.46391e-07
947	6	23192338	23939306	1229	140	RA	0.000914745	1.4672e-06
948	6	23939307	24950379	1808	196	RA	0.00120168	1.33218e-07
949	6	24950380	25684629	1621	151	RA	0.00167427	7.09669e-14
950	6	25684630	26396200	1314	84	RA	0.00272333	3.82305e-43
951	6	26396201	27261035	940	64	RA	0.00246044	1.00795e-37
952	6	27261036	28666364	1948	81	RA	0.0036981	1.25787e-54
954	6	29529756	29833843	240	30	RA	0.00625483	1.2155e-139
955	6	29833844	30070717	22	10	RA	0.00208146	4.33115e-42
956	6	30070718	30715006	23	15	RA	0.00206316	1.31074e-38
957	6	30715007	31106493	241	58	RA	0.017779	0
958	6	31106494	31250556	177	33	RA	0.0121009	8.06186e-261
959	6	31250557	31320268	85	16	RA	0.00473395	8.26057e-94
961	6	31427210	32208901	548	95	RA	0.0505337	0
962	6	32208902	32454577	37	15	RA	0.0167351	0
964	6	32539568	32586784	39	9	RA	0.0402607	0
965	6	32586785	32629239	28	12	RA	0.0677611	0
966	6	32629240	32682213	22	7	RA	0.0144845	2.584e-321
968	6	32897999	33194975	272	57	RA	0.0223535	0
969	6	33194976	33864262	1036	134	RA	0.0148216	0
970	6	33864263	34979270	1505	140	RA	0.00312928	1.57097e-36
972	6	36346354	37570051	1858	217	RA	0.0017979	4.08616e-13
978	6	43770627	44596897	1088	216	RA	0.00120168	1.73083e-07
980	6	45408422	46430701	1220	147	RA	0.000986504	9.61027e-07
1022	6	89974268	91097024	1247	168	RA	0.000824396	5.10893e-05
1037	6	106053916	107309327	2072	225	RA	0.00163902	1.65816e-10
1073	6	150635316	151629954	1928	226	RA	0.00098638	9.77478e-06
1082	6	158952061	159604052	1220	118	RA	0.00106804	1.47054e-08
1090	6	166853326	167714865	184	113	RA	0.00190143	4.56606e-19
1113	7	13676748	15013694	1932	235	RA	0.00118228	1.48872e-06
1116	7	16739014	17596578	1308	231	RA	0.00108419	3.92558e-06
1124	7	24894120	25671575	1305	184	RA	0.000918683	1.6009e-05
1125	7	25671576	27351286	2346	220	RA	0.000965271	1.57132e-05
1126	7	27351287	28890886	2064	245	RA	0.00172092	2.7771e-10
1143	7	47253455	48363585	1641	215	RA	0.000957528	1.94752e-05
1162	7	67474723	68569224	2241	192	RA	0.00103122	2.02156e-06
1169	7	77663965	78685009	2001	209	RA	0.000904346	3.24886e-05
1207	7	127903739	128779173	1423	116	RA	0.00123152	5.34504e-11
1208	7	128779174	130418704	2096	207	RA	0.00129959	1.83253e-08
1215	7	138755108	140217630	1794	203	RA	0.00122184	2.42007e-07
1232	8	11740	660414	1064	166	RA	0.000788539	7.0127e-05
1250	8	10478852	11466761	1637	191	RA	0.00144225	6.37911e-10
1263	8	18668610	19488888	1573	221	RA	0.00094969	4.68287e-05
1264	8	19488889	20135628	1237	171	RA	0.000777193	7.45616e-05
1274	8	28344177	29744540	1480	182	RA	0.000980529	4.52279e-06
1276	8	31134787	32454962	2368	177	RA	0.00099271	4.49481e-06
1304	8	68683824	70004665	2031	219	RA	0.000950856	4.53477e-05
1307	8	72013185	72917489	1382	191	RA	0.00169891	1.14414e-12
1314	8	79756170	81340231	2209	192	RA	0.00138616	7.43626e-09
1330	8	101448440	102548680	1293	181	RA	0.00117282	1.40134e-07
1334	8	105370131	106500950	1473	173	RA	0.000780652	6.51645e-05
1337	8	108647464	109920827	1932	133	RA	0.000810788	1.3624e-07
1353	8	128073655	129291118	1901	265	RA	0.00250234	1.00844e-18
1354	8	129291119	130383563	1658	130	RA	0.000713963	8.71543e-05
1355	8	130383564	131545725	1857	171	RA	0.000877839	1.84014e-05
1356	8	131545726	132534636	1745	173	RA	0.00096812	4.94043e-06
1358	8	133461552	134509448	1646	213	RA	0.00129753	5.99131e-08
1364	8	139404632	140355988	1367	177	RA	0.000816626	8.01606e-05
1376	9	4025356	4596614	868	189	RA	0.000836332	9.30488e-05
1378	9	5437592	6859791	1906	218	RA	0.00125583	3.70459e-08
1381	9	8262304	9170120	1835	216	RA	0.00105661	4.02431e-06
1391	9	15839404	16658377	1155	198	RA	0.000937692	1.01337e-05
1398	9	21674033	23091193	1955	210	RA	0.00109515	1.80741e-06
1411	9	33194893	34704544	1856	130	RA	0.000788054	9.97841e-06
1413	9	36749274	37687112	1175	172	RA	0.000951214	4.78526e-06
1424	9	78630916	79451035	1335	208	RA	0.00108496	1.40695e-06
1453	9	109150718	110630150	2007	253	RA	0.00088408	8.89606e-05
1461	9	116159541	117054909	1348	189	RA	0.00102319	3.01893e-06
1467	9	122677720	124119883	1265	154	RA	0.000800966	3.52432e-05
1469	9	125137579	126092931	1009	100	RA	0.000598012	9.89837e-05
1472	9	128785783	129617771	1109	200	RA	0.00117283	3.636e-07
1486	10	1329233	1872960	943	159	RA	0.000991624	2.03581e-06
1489	10	3225337	3880322	1117	150	RA	0.000897866	5.96472e-06
1492	10	5396243	6234718	1489	217	RA	0.00204113	1.79727e-15
1493	10	6234719	6897037	1019	176	RA	0.00147869	7.76983e-11
1495	10	7659873	8771920	2027	237	RA	0.00168542	2.64596e-10
1496	10	8771921	10081279	2103	168	RA	0.000890753	2.22684e-05
1499	10	11856925	12581571	1184	165	RA	0.000796781	3.82744e-05
1501	10	13208062	14008135	1306	236	RA	0.00123724	2.15216e-07
1503	10	14820756	15946677	1633	187	RA	0.000877037	5.89471e-05
1512	10	24489448	25577761	1216	193	RA	0.00123942	1.68858e-07
1520	10	30919470	32457293	1967	171	RA	0.000898813	1.70625e-05
1544	10	62626466	64069687	1952	181	RA	0.00157291	1.56678e-11
1545	10	64069688	65400431	1862	140	RA	0.00116964	1.05914e-08
1567	10	87287936	88443652	1697	173	RA	0.00112188	3.9417e-07
1573	10	94503300	95528160	1840	170	RA	0.00115553	8.14542e-08
1597	10	123856185	124894142	1597	204	RA	0.0013294	5.17062e-09
1601	10	127997709	129134738	1330	198	RA	0.00112298	1.06097e-06
1603	10	129831970	130694008	1450	230	RA	0.00145295	3.60058e-09
1613	11	2477450	3362508	852	190	RA	0.00105161	2.0001e-06
1624	11	11632651	12470449	1485	224	RA	0.00102904	8.48439e-06
1625	11	12470450	13364727	1237	171	RA	0.00114286	1.073e-07
1649	11	36331190	37119024	1217	123	RA	0.00101362	1.18944e-07
1671	11	60515106	61717117	1082	154	RA	0.00120152	1.34591e-08
1677	11	68887345	69713996	1178	168	RA	0.000890006	9.63709e-06
1678	11	69713997	71242834	2366	238	RA	0.000920516	6.47232e-05
1699	11	92209169	93576641	1635	156	RA	0.000806816	3.26434e-05
1701	11	94384536	95327210	1143	153	RA	0.00114923	4.89436e-08
1726	11	121208187	122589224	1685	199	RA	0.00103609	2.97011e-06
1735	11	130500784	131424361	156	105	RA	0.000673436	4.82705e-05
1744	12	3871115	4967643	1342	226	RA	0.000917556	5.71681e-05
1805	12	70097806	71177961	2018	156	RA	0.000827459	3.70195e-05
1811	12	76524574	77800463	1760	181	RA	0.000848269	5.04041e-05
1841	12	111592382	113947983	2080	164	RA	0.000938438	6.59739e-06
1843	12	114685671	115439451	1257	169	RA	0.000882925	2.89628e-06
1844	12	115439452	116197675	1149	190	RA	0.00104144	3.51298e-06
1845	12	116197676	117091843	1249	193	RA	0.00101882	5.06475e-06
1874	13	30068526	31433218	2215	231	RA	0.00169171	7.00641e-12
1883	13	40091624	41003943	1293	181	RA	0.00123112	7.91169e-08
1884	13	41003944	42037054	1023	101	RA	0.000715182	1.10208e-05
1893	13	50419897	51554236	1434	154	RA	0.00108772	1.26708e-07
1914	13	74437636	75882384	2109	206	RA	0.00105264	5.01375e-06
1915	13	75882385	76671493	1367	144	RA	0.000861622	1.00785e-05
1932	13	91764205	93285142	1989	159	RA	0.000869259	1.88421e-05
1945	13	107037865	108521978	1963	270	RA	0.00113017	1.58652e-05
1958	14	23985937	24906056	1000	151	RA	0.000784928	4.33907e-05
1966	14	33591114	34695195	1465	290	RA	0.0012462	1.89789e-06
1992	14	60099483	61652816	1428	81	RA	0.000608896	2.95973e-05
2007	14	77425454	78374053	1857	167	RA	0.000832396	3.31834e-05
2011	14	82524786	84087372	2488	222	RA	0.00114168	7.38145e-07
2018	14	90662837	92101228	1952	188	RA	0.000967568	1.78077e-05
2019	14	92101229	93386328	1996	227	RA	0.00117912	9.69234e-07
2022	14	95946793	97174314	1979	237	RA	0.001183	9.17984e-07
2025	14	98885323	99474533	1202	141	RA	0.000748638	3.87253e-05
2048	15	37962916	39238840	1653	205	RA	0.00132386	1.36784e-08
2050	15	40604781	42332685	1845	149	RA	0.000786582	4.31646e-05
2055	15	47693317	49260006	1483	155	RA	0.000941591	1.77719e-06
2071	15	67396521	69089815	1933	200	RA	0.00103756	2.05135e-06
2081	15	79998207	81077025	1659	221	RA	0.00106479	2.12043e-06
2083	15	82191078	84209760	1626	190	RA	0.000997495	8.17576e-06
2093	15	93707011	94565521	1532	236	RA	0.00115423	1.60318e-06
2115	16	11022543	11916631	1591	176	RA	0.00163241	1.86704e-12
2126	16	26154123	27443061	1978	269	RA	0.00159197	7.94017e-09
2128	16	29043178	31384210	1077	112	RA	0.000947972	1.7989e-07
2157	16	77739133	78280636	1384	187	RA	0.000840201	5.65237e-05
2165	16	83778372	84440154	1627	265	RA	0.00134945	1.40861e-07
2166	16	84440155	85146805	1594	251	RA	0.000921779	8.2364e-05
2168	16	86058598	86748867	1439	275	RA	0.0010696	1.63523e-05
2171	16	88387229	89106304	79	60	RA	0.000590162	1.58093e-05
2177	17	3430441	4463971	1180	166	RA	0.00134943	8.95878e-10
2178	17	4463972	5573784	1702	157	RA	0.00111444	5.72963e-08
2179	17	5573785	6305078	1245	197	RA	0.000928353	1.70798e-05
2184	17	10572618	11778164	1464	195	RA	0.000914053	9.7629e-06
2198	17	31318754	32356061	1655	231	RA	0.00109557	2.65864e-06
2205	17	40233546	42348003	1853	165	RA	0.00105423	4.31446e-07
2206	17	42348004	43460500	1140	133	RA	0.000754626	3.04014e-05
2210	17	47516225	48722590	1081	230	RA	0.0010243	6.90772e-06
2212	17	49909299	51110385	1817	102	RA	0.000728299	1.51471e-05
2218	17	58652810	60453120	1210	153	RA	0.000978084	1.59649e-06
2222	17	64438388	65582327	1512	229	RA	0.00108902	4.30095e-06
2227	17	70495120	71466953	1228	238	RA	0.000968481	3.38128e-05
2231	17	74908267	75619256	1125	185	RA	0.000949235	6.54484e-06
2244	18	5575813	6756496	1461	241	RA	0.00147275	9.57862e-09
2247	18	8788525	9816164	1871	234	RA	0.000881327	9.74519e-05
2251	18	12735559	13641479	1294	176	RA	0.00189475	5.93171e-16
2293	18	65294196	66407960	2096	180	RA	0.000978515	6.4605e-06
2312	19	4741719	5478684	989	185	RA	0.00131087	5.19155e-09
2314	19	6455429	7249359	1186	181	RA	0.000818984	7.52754e-05
2318	19	10028841	11681978	1867	215	RA	0.00415316	2.86685e-40
2324	19	16079007	17045963	1200	116	RA	0.000999724	1.05788e-07
2327	19	18504868	19749166	1247	126	RA	0.00089519	1.39651e-06
2342	19	35649344	36638122	1240	185	RA	0.000889836	5.26482e-05
2351	19	45040933	45893307	842	140	RA	0.000914831	2.40393e-06
2358	19	51259179	51903804	860	165	RA	0.000808873	4.79911e-05
2365	19	55714086	56411086	146	103	RA	0.000729837	8.37159e-06
2375	20	5379451	6128358	1180	165	RA	0.000855931	2.99425e-05
2390	20	18959420	19957928	1473	203	RA	0.000857475	9.69794e-05
2400	20	33890061	35990261	1588	142	RA	0.000959762	1.1122e-06
2408	20	44072211	45673603	2139	233	RA	0.00132688	8.10941e-08
2435	21	19479025	20407307	1502	181	RA	0.000849062	7.31384e-05
2447	21	32202240	33270272	1518	167	RA	0.000891104	6.80571e-06
2449	21	34383795	35729261	1606	224	RA	0.00176306	3.55389e-11
2458	21	43812792	44815008	143	92	RA	0.000609372	9.45102e-05
2482	22	37364005	38718589	1683	218	RA	0.00129936	4.73567e-08
2483	22	38718590	40378783	1702	187	RA	0.00211827	9.4122e-17
3	1	2215496	2983519	728	105	RA	0.000876828	6.57736e-07
16	1	14720132	15755230	1624	245	RA	0.000989147	2.60732e-05
19	1	17557747	18427820	1394	164	RA	0.000900337	1.64502e-05
34	1	35201627	36855139	1014	103	RA	0.000659362	3.0963e-05
36	1	38474037	40200950	2172	220	RA	0.00113687	1.59292e-06
40	1	43512670	45167235	1819	188	RA	0.000991392	2.41482e-06
58	1	67761891	68633860	1119	146	RA	0.000833575	1.22131e-05
60	1	69438910	70992905	1941	190	RA	0.000865451	5.43879e-05
97	1	110224231	111134062	1019	168	RA	0.000837685	5.76051e-05
100	1	113418038	114664387	1285	134	RA	0.0101595	1.11055e-194
101	1	114664388	116207297	2414	210	RA	0.00126766	4.84077e-08
112	1	153410810	154685545	1143	122	RA	0.000833927	3.38163e-06
113	1	154685546	156813845	1611	198	RA	0.00126136	2.53158e-08
122	1	164726580	165553812	1363	185	RA	0.00104653	2.31541e-06
125	1	167163955	168179086	1251	167	RA	0.00141052	2.45567e-10
130	1	172465154	173582511	1133	141	RA	0.00208006	2.01879e-18
154	1	200134006	201067952	1290	138	RA	0.00107648	7.24774e-08
155	1	201067953	202583884	2011	260	RA	0.00135066	6.77604e-08
156	1	202583885	204092537	1886	224	RA	0.00138009	1.32274e-08
158	1	205009624	205917548	1442	169	RA	0.00082347	8.49273e-05
159	1	205917549	208162951	1687	183	RA	0.00136503	1.75053e-09
160	1	208162952	209711169	1997	264	RA	0.000993138	3.84664e-05
179	1	230227248	231287764	2133	238	RA	0.000837574	8.24378e-05
185	1	235097114	236199671	1036	110	RA	0.00129381	5.07987e-11
217	2	11995766	12732506	1201	195	RA	0.001136	2.98002e-07
232	2	29627933	30575619	1331	164	RA	0.00112249	1.13108e-07
245	2	40786177	41540439	1125	111	RA	0.000673971	3.47577e-05
250	2	45189469	45850047	1018	187	RA	0.00125231	5.19749e-09
268	2	60775067	62429910	1844	185	RA	0.00116017	2.437e-07
269	2	62429911	63672118	1226	159	RA	0.000837994	2.23409e-05
271	2	64696090	65938002	1659	189	RA	0.0012321	7.83584e-08
274	2	67979829	68877774	1296	127	RA	0.000812003	1.25555e-05
275	2	68877775	70756283	2342	211	RA	0.00178311	2.78195e-13
284	2	78080058	79019676	1443	104	RA	0.000624405	6.48137e-05
290	2	84395900	85992794	2171	188	RA	0.000898404	2.63822e-05
297	2	100202437	101556799	1866	160	RA	0.00165409	4.14181e-13
301	2	105120579	106546524	2208	228	RA	0.00120175	3.68945e-07
305	2	110097869	112644828	1442	151	RA	0.00102455	2.85175e-07
306	2	112644829	113930668	1613	159	RA	0.00081618	4.18549e-05
340	2	152497376	153999309	2129	159	RA	0.00108008	3.12943e-07
378	2	198140351	199654969	1163	93	RA	0.000658089	2.98991e-05
382	2	203639687	205038119	1497	117	RA	0.00252421	2.51908e-27
399	2	222327714	223353965	1190	148	RA	0.000815061	4.56858e-05
424	3	2140012	3128152	1684	264	RA	0.00101952	1.05003e-05
431	3	8664893	9970731	1584	253	RA	0.00103081	2.91874e-05
434	3	11997659	12859209	1267	110	RA	0.00103793	2.15761e-08
448	3	27614909	28649810	1278	133	RA	0.00142166	3.22122e-11
463	3	45844192	47588461	2255	154	RA	0.000790694	4.40638e-05
474	3	61277588	62609818	1638	251	RA	0.00124524	6.1731e-07
482	3	69784970	71223281	1419	188	RA	0.00101608	7.84417e-06
483	3	71223282	72334704	1401	252	RA	0.000960957	7.11211e-05
511	3	104878978	106174685	1878	160	RA	0.00101736	2.09431e-07
512	3	106174686	107736519	2012	201	RA	0.00081812	8.06113e-05
519	3	113657666	115649909	1985	228	RA	0.00105612	6.72286e-06
539	3	133718494	135288394	2061	225	RA	0.000947935	5.72341e-05
561	3	159478752	160584961	1394	104	RA	0.000849707	1.08806e-06
584	3	186602046	187939199	1944	265	RA	0.00200521	1.03736e-12
585	3	187939200	189451805	1898	222	RA	0.0010509	6.93641e-06
597	4	812416	1529267	1131	96	RA	0.000662497	5.85562e-05
603	4	5972710	7135819	1713	268	RA	0.00106605	9.05822e-06
610	4	10370667	11050119	1124	133	RA	0.000779385	2.32507e-05
638	4	37880861	38984838	1912	235	RA	0.00113517	3.6089e-06
645	4	43962562	45186767	2286	139	RA	0.000999223	5.96872e-07
658	4	61971162	63337954	1690	178	RA	0.000827092	6.11635e-05
692	4	102544804	104384534	2224	171	RA	0.00179193	7.75685e-14
786	5	10549030	11850850	1859	211	RA	0.000956738	2.07811e-05
791	5	16592320	17803477	1489	196	RA	0.000881156	3.61742e-05
794	5	20397014	21211399	921	64	RA	0.000513493	8.01021e-05
806	5	33971057	35157146	1646	153	RA	0.00103033	6.64465e-07
811	5	40290852	41279590	1618	132	RA	0.000805191	1.11593e-05
822	5	55221399	55968966	1227	192	RA	0.00364621	2.89862e-36
839	5	75959516	77290255	1956	225	RA	0.00102486	1.00586e-05
840	5	77290256	79005158	1942	174	RA	0.00091257	1.67637e-05
888	5	132554691	134556570	2353	276	RA	0.00212969	8.82178e-14
892	5	139408117	141253830	1875	201	RA	0.0010651	4.03237e-06
899	5	149850204	150981934	1758	174	RA	0.00109222	2.48735e-07
907	5	157191082	158484775	1841	195	RA	0.00126558	3.52099e-08
908	5	158484776	159663733	1691	185	RA	0.00138614	4.71528e-10
909	5	159663734	160519049	1374	175	RA	0.00104207	1.31494e-06
913	5	163781269	165289211	2006	219	RA	0.000977106	1.99806e-05
915	5	166863414	168342743	1727	255	RA	0.00128561	7.7456e-07
919	5	172285683	173606995	1957	233	RA	0.00115755	7.08575e-07
921	5	174662886	176180301	1495	210	RA	0.00113399	1.12474e-06
923	5	177659903	178595252	171	102	RA	0.000707781	2.92535e-05
926	6	63979	1380679	1806	253	RA	0.00178394	2.02545e-11
931	6	5378214	6621937	1914	259	RA	0.00113531	4.79603e-06
932	6	6621938	7808323	1980	254	RA	0.000997945	3.57931e-05
947	6	23192338	23939306	1276	140	RA	0.000907786	2.20308e-06
948	6	23939307	24950379	1870	200	RA	0.00114109	3.20877e-07
949	6	24950380	25684629	1650	151	RA	0.00177869	1.17961e-15
950	6	25684630	26396200	1339	85	RA	0.0028706	2.82019e-46
951	6	26396201	27261035	974	64	RA	0.00243783	1.23058e-37
952	6	27261036	28666364	1986	79	RA	0.0037881	3.21977e-57
953	6	28666365	29529755	192	45	RA	0.00372105	1.21301e-65
955	6	29833844	30070717	25	11	RA	0.00208776	1.18669e-41
956	6	30070718	30715006	20	12	RA	0.00193274	1.2909e-36
957	6	30715007	31106493	217	54	RA	0.0173319	0
958	6	31106494	31250556	181	33	RA	0.0121175	4.68947e-260
959	6	31250557	31320268	85	16	RA	0.00473395	8.26057e-94
961	6	31427210	32208901	568	97	RA	0.0490608	0
962	6	32208902	32454577	30	15	RA	0.0125597	1.21289e-252
964	6	32539568	32586784	40	9	RA	0.0392404	0
965	6	32586785	32629239	29	13	RA	0.0680314	0
966	6	32629240	32682213	32	8	RA	0.0149836	0
967	6	32682214	32897998	316	49	RA	0.0539622	0
969	6	33194976	33864262	1073	135	RA	0.0159542	0
970	6	33864263	34979270	1537	137	RA	0.0031502	3.95027e-37
971	6	34979271	36346353	1675	170	RA	0.00152296	9.38453e-11
972	6	36346354	37570051	1881	214	RA	0.00172455	1.36034e-12
978	6	43770627	44596897	1115	216	RA	0.00135624	7.50952e-09
980	6	45408422	46430701	1263	149	RA	0.000991731	1.12474e-06
1022	6	89974268	91097024	1257	164	RA	0.000791557	6.64219e-05
1051	6	121908064	122929290	1685	94	RA	0.000618188	6.53972e-05
1063	6	137553213	138825721	2098	195	RA	0.00443138	1.55184e-52
1073	6	150635316	151629954	2015	226	RA	0.000894438	5.19414e-05
1082	6	158952061	159604052	1242	117	RA	0.00103264	3.24484e-08
1089	6	165835954	166853325	138	100	RA	0.000675039	4.30566e-05
1090	6	166853326	167714865	185	113	RA	0.00194425	1.25461e-19
1116	7	16739014	17596578	1313	229	RA	0.00126616	1.58965e-07
1125	7	25671576	27351286	2373	217	RA	0.000851266	9.81278e-05
1126	7	27351287	28890886	2067	243	RA	0.00171542	1.55471e-10
1127	7	28890887	30175113	2138	233	RA	0.000912089	6.1197e-05
1146	7	49632427	50894508	2091	165	RA	0.00125903	7.1864e-09
1162	7	67474723	68569224	2389	192	RA	0.00107403	9.23178e-07
1176	7	86446539	87836641	1535	120	RA	0.000680028	8.47002e-05
1207	7	127903739	128779173	1451	116	RA	0.00120547	1.11564e-10
1208	7	128779174	130418704	2112	204	RA	0.00132006	1.28726e-08
1214	7	137657460	138755107	1477	218	RA	0.000843585	7.15076e-05
1215	7	138755108	140217630	1802	204	RA	0.00130278	4.53015e-08
1250	8	10478852	11466761	1662	189	RA	0.00128884	1.69009e-08
1263	8	18668610	19488888	1605	223	RA	0.00103006	1.34064e-05
1264	8	19488889	20135628	1250	171	RA	0.000764271	7.40918e-05
1276	8	31134787	32454962	2369	176	RA	0.000933391	1.00982e-05
1314	8	79756170	81340231	2221	192	RA	0.00130458	4.04221e-08
1353	8	128073655	129291118	1898	262	RA	0.00250937	9.41263e-19
1356	8	131545726	132534636	1762	173	RA	0.000919755	1.21821e-05
1358	8	133461552	134509448	1665	212	RA	0.0014447	3.63392e-09
1364	8	139404632	140355988	1415	179	RA	0.000829458	6.56548e-05
1376	9	4025356	4596614	887	191	RA	0.000987205	9.64207e-06
1381	9	8262304	9170120	1709	219	RA	0.00107717	3.10529e-06
1412	9	34704545	36749273	2210	237	RA	0.00108187	2.77147e-06
1413	9	36749274	37687112	1200	171	RA	0.000770664	9.61635e-05
1467	9	122677720	124119883	1284	154	RA	0.000966348	1.64495e-06
1470	9	126092932	127184582	1514	157	RA	0.000891339	7.45991e-06
1472	9	128785783	129617771	1124	197	RA	0.000923276	3.49784e-05
1486	10	1329233	1872960	977	162	RA	0.00110722	2.43591e-07
1489	10	3225337	3880322	1123	149	RA	0.00103831	2.33987e-07
1493	10	6234719	6897037	1034	176	RA	0.00140135	6.47229e-10
1494	10	6897038	7659872	1440	203	RA	0.000905321	4.98128e-05
1495	10	7659873	8771920	2098	243	RA	0.00187209	8.21488e-12
1496	10	8771921	10081279	2129	167	RA	0.000848558	4.94899e-05
1499	10	11856925	12581571	1191	160	RA	0.000859298	9.82033e-06
1501	10	13208062	14008135	1314	237	RA	0.00117817	1.0374e-06
1503	10	14820756	15946677	1715	189	RA	0.000911596	2.92947e-05
1520	10	30919470	32457293	2003	173	RA	0.000844972	4.47601e-05
1521	10	32457294	33655458	2315	129	RA	0.000722679	6.93893e-05
1544	10	62626466	64069687	1993	176	RA	0.0014516	3.16474e-10
1545	10	64069688	65400431	1946	140	RA	0.000979987	6.9609e-07
1561	10	81763231	82378048	1181	101	RA	0.00104363	3.1745e-09
1567	10	87287936	88443652	1759	175	RA	0.00103612	2.23148e-06
1573	10	94503300	95528160	1839	173	RA	0.00112425	2.36172e-07
1597	10	123856185	124894142	1716	202	RA	0.00143407	4.45618e-10
1598	10	124894143	125798319	1658	211	RA	0.00118361	1.03104e-07
1601	10	127997709	129134738	1363	200	RA	0.00111652	1.63378e-06
1603	10	129831970	130694008	1471	231	RA	0.00134233	3.45346e-08
1613	11	2477450	3362508	861	186	RA	0.000885987	2.68392e-05
1624	11	11632651	12470449	1479	220	RA	0.0010548	4.64595e-06
1625	11	12470450	13364727	1251	172	RA	0.00115588	9.93974e-08
1648	11	35500368	36331189	1097	168	RA	0.000894739	6.12261e-06
1664	11	51581596	55477633	1290	10	RA	0.000551385	2.98917e-08
1677	11	68887345	69713996	1214	166	RA	0.000841291	1.98104e-05
1678	11	69713997	71242834	2442	240	RA	0.00094811	6.51771e-05
1701	11	94384536	95327210	1095	151	RA	0.00099796	1.0402e-06
1723	11	117295642	118901213	2249	254	RA	0.00107417	1.08198e-05
1724	11	118901214	120064528	1494	188	RA	0.000904973	2.11308e-05
1733	11	128262551	129451784	983	189	RA	0.00186268	8.99112e-14
1735	11	130500784	131424361	155	104	RA	0.000668525	4.94682e-05
1756	12	16136743	17374895	1109	147	RA	0.000720656	7.72154e-05
1823	12	92061180	93487547	2055	199	RA	0.00106674	1.54432e-06
1841	12	111592382	113947983	2063	165	RA	0.00102196	1.45016e-06
1845	12	116197676	117091843	1238	190	RA	0.00108184	9.15006e-07
1852	12	124843769	126079935	1855	264	RA	0.000941222	4.64691e-05
1872	13	27392006	28587125	2060	218	RA	0.00122387	2.38759e-07
1874	13	30068526	31433218	2246	231	RA	0.00170708	1.00438e-11
1914	13	74437636	75882384	2143	209	RA	0.00105548	4.37497e-06
1932	13	91764205	93285142	1953	157	RA	0.000916384	6.80632e-06
1966	14	33591114	34695195	1480	291	RA	0.00123673	2.51025e-06
2011	14	82524786	84087372	2507	220	RA	0.00104377	3.69259e-06
2018	14	90662837	92101228	1971	189	RA	0.000880466	5.13775e-05
2021	14	94892241	95946792	2027	278	RA	0.00120007	3.60343e-06
2025	14	98885323	99474533	1245	144	RA	0.000794609	1.83717e-05
2042	15	30604120	32177320	1475	169	RA	0.000832396	3.40771e-05
2048	15	37962916	39238840	1687	207	RA	0.00153519	2.75204e-10
2055	15	47693317	49260006	1488	154	RA	0.0008809	5.79808e-06
2081	15	79998207	81077025	1680	223	RA	0.000939578	2.39856e-05
2083	15	82191078	84209760	1765	190	RA	0.000913053	3.58022e-05
2093	15	93707011	94565521	1543	235	RA	0.00116366	1.37077e-06
2115	16	11022543	11916631	1638	177	RA	0.00159197	2.82453e-12
2126	16	26154123	27443061	2006	267	RA	0.00138373	2.97378e-07
2128	16	29043178	31384210	1105	112	RA	0.000863797	1.36227e-06
2157	16	77739133	78280636	1403	187	RA	0.00091963	1.46355e-05
2158	16	78280637	78973580	1816	247	RA	0.000929187	3.56025e-05
2165	16	83778372	84440154	1654	264	RA	0.00128849	4.17115e-07
2167	16	85146806	86058597	1001	226	RA	0.00150456	7.06789e-10
2168	16	86058598	86748867	1469	277	RA	0.00123556	6.45871e-07
2175	17	1480057	2699135	1248	195	RA	0.000821889	7.95222e-05
2177	17	3430441	4463971	1250	167	RA	0.00138715	3.80034e-10
2179	17	5573785	6305078	1269	198	RA	0.000928461	1.65604e-05
2184	17	10572618	11778164	1485	197	RA	0.00097657	3.82698e-06
2191	17	17326541	18900978	1300	104	RA	0.000705522	2.82306e-05
2198	17	31318754	32356061	1694	228	RA	0.00109563	2.19333e-06
2203	17	37361179	38880481	1519	104	RA	0.00077125	4.03041e-06
2205	17	40233546	42348003	1905	165	RA	0.00108079	2.81163e-07
2212	17	49909299	51110385	1931	102	RA	0.00069487	3.31228e-05
2216	17	54950108	56245227	1402	249	RA	0.00154983	1.35308e-09
2218	17	58652810	60453120	1223	151	RA	0.000854421	1.55053e-05
2227	17	70495120	71466953	1280	242	RA	0.00109231	5.55448e-06
2231	17	74908267	75619256	1202	184	RA	0.000820598	5.07324e-05
2232	17	75619257	76596287	1445	243	RA	0.00103107	4.78325e-06
2244	18	5575813	6756496	1481	242	RA	0.00142337	2.00483e-08
2246	18	7862480	8788524	1424	194	RA	0.000907302	2.77848e-05
2247	18	8788525	9816164	1909	235	RA	0.00102037	1.6276e-05
2251	18	12735559	13641479	1334	179	RA	0.0018329	4.797e-15
2262	18	28792735	30401128	2118	193	RA	0.0012023	6.54105e-08
2313	19	5478685	6455428	1374	143	RA	0.000815861	1.80264e-05
2314	19	6455429	7249359	1228	185	RA	0.000875929	3.21663e-05
2318	19	10028841	11681978	1991	218	RA	0.00421494	7.88471e-42
2324	19	16079007	17045963	1230	114	RA	0.000907567	5.39256e-07
2327	19	18504868	19749166	1278	124	RA	0.000777656	1.38195e-05
2328	19	19749167	20485499	1203	83	RA	0.000576783	8.81742e-05
2342	19	35649344	36638122	1274	184	RA	0.00113097	7.03088e-07
2365	19	55714086	56411086	147	103	RA	0.000719918	1.06301e-05
2374	20	4591848	5379450	1161	162	RA	0.000895662	6.56823e-06
2375	20	5379451	6128358	1173	166	RA	0.000896325	1.48494e-05
2380	20	10279604	11257012	1520	182	RA	0.00117946	2.32339e-07
2390	20	18959420	19957928	1515	202	RA	0.000863746	6.18294e-05
2400	20	33890061	35990261	1642	144	RA	0.00132302	1.04167e-09
2408	20	44072211	45673603	2268	235	RA	0.00131501	1.13393e-07
2435	21	19479025	20407307	1543	175	RA	0.000948894	1.32214e-05
2449	21	34383795	35729261	1640	224	RA	0.00156962	2.20419e-09
2455	21	41344743	42187152	1472	178	RA	0.00102861	1.60544e-06
2463	22	17587475	18535225	1458	200	RA	0.00098404	1.06306e-05
2472	22	27192924	27952441	1364	259	RA	0.00117119	2.03906e-06
2473	22	27952442	29457601	1609	186	RA	0.000847498	3.09902e-05
2482	22	37364005	38718589	1733	218	RA	0.00132473	3.58702e-08
2483	22	38718590	40378783	1781	187	RA	0.00206476	1.86814e-16
3	1	2215496	2983519	743	107	RA	0.000838591	1.74313e-06
10	1	7711795	8580987	1192	156	RA	0.000772599	1.72262e-05
14	1	11709174	13481025	1348	160	RA	0.000937491	9.04853e-07
16	1	14720132	15755230	1656	248	RA	0.00101398	1.92551e-05
19	1	17557747	18427820	1422	171	RA	0.00082043	9.06656e-05
26	1	23907046	25885138	2026	216	RA	0.00120466	4.58079e-07
34	1	35201627	36855139	1023	105	RA	0.000673386	2.17221e-05
36	1	38474037	40200950	2216	223	RA	0.00106216	5.91424e-06
40	1	43512670	45167235	1856	194	RA	0.00120588	8.28823e-08
57	1	66778016	67761890	1505	142	RA	0.00128203	1.73624e-09
58	1	67761891	68633860	1138	152	RA	0.000796985	2.64094e-05
59	1	68633861	69438909	1305	128	RA	0.000753383	1.72557e-05
60	1	69438910	70992905	1975	197	RA	0.000969239	1.50175e-05
88	1	101188316	102424611	1938	177	RA	0.00123672	7.85501e-08
95	1	107874654	109271449	1915	180	RA	0.000814358	8.68353e-05
97	1	110224231	111134062	1071	173	RA	0.000880611	3.07739e-05
100	1	113418038	114664387	1303	141	RA	0.0103695	2.84997e-198
101	1	114664388	116207297	2423	213	RA	0.00122922	1.22806e-07
103	1	117046312	118118667	1156	133	RA	0.00103503	1.02415e-07
112	1	153410810	154685545	1161	128	RA	0.000793938	1.07523e-05
113	1	154685546	156813845	1632	204	RA	0.00124289	4.57691e-08
114	1	156813846	158081627	1891	195	RA	0.0013852	2.06645e-09
118	1	161054077	161945442	1249	116	RA	0.000817405	2.69571e-06
122	1	164726580	165553812	1399	192	RA	0.00114078	7.37867e-07
125	1	167163955	168179086	1273	173	RA	0.00157487	7.60664e-12
130	1	172465154	173582511	1177	145	RA	0.00218576	2.11722e-19
154	1	200134006	201067952	1323	143	RA	0.00110173	3.70549e-08
156	1	202583885	204092537	1909	227	RA	0.00135709	2.65937e-08
158	1	205009624	205917548	1472	174	RA	0.000848348	6.23893e-05
159	1	205917549	208162951	1773	194	RA	0.00125414	4.63714e-08
179	1	230227248	231287764	2193	247	RA	0.000925848	2.71904e-05
185	1	235097114	236199671	1082	113	RA	0.00118601	9.12189e-10
217	2	11995766	12732506	1219	202	RA	0.00105148	2.3594e-06
232	2	29627933	30575619	1423	174	RA	0.00115847	1.34953e-07
245	2	40786177	41540439	1165	117	RA	0.000670242	5.22331e-05
268	2	60775067	62429910	1889	190	RA	0.00108921	1.04316e-06
269	2	62429911	63672118	1258	165	RA	0.000862182	1.85584e-05
271	2	64696090	65938002	1711	199	RA	0.00134645	9.95303e-09
274	2	67979829	68877774	1376	132	RA	0.000880535	4.23004e-06
275	2	68877775	70756283	2385	218	RA	0.00172108	1.65271e-12
284	2	78080058	79019676	1475	113	RA	0.000729431	1.51368e-05
286	2	79900056	80737811	1117	200	RA	0.000869177	1.94122e-05
296	2	98989361	100202436	1405	111	RA	0.000754599	7.81776e-06
297	2	100202437	101556799	2030	163	RA	0.00179831	1.58444e-14
301	2	105120579	106546524	2242	236	RA	0.00127277	1.42119e-07
304	2	108417774	110097868	2100	172	RA	0.00120201	2.50454e-08
305	2	110097869	112644828	1537	158	RA	0.00116982	1.79883e-08
306	2	112644829	113930668	1668	160	RA	0.000812046	4.08586e-05
314	2	122026818	123219243	1644	121	RA	0.000533685	3.37826e-05
334	2	143259781	144503688	1495	139	RA	0.000712157	9.81233e-05
335	2	144503689	145977920	1157	162	RA	0.000813321	4.78785e-05
360	2	174927564	176734750	2287	205	RA	0.00109255	2.3523e-06
378	2	198140351	199654969	1216	100	RA	0.00082406	1.27281e-06
382	2	203639687	205038119	1528	124	RA	0.00255764	5.05769e-27
384	2	206821200	207726594	1251	150	RA	0.000729368	6.85888e-05
408	2	231847387	233352722	2055	186	RA	0.000841828	6.78335e-05
423	3	1440049	2140011	1751	201	RA	0.000974252	7.16457e-06
425	3	3128153	4109393	1908	234	RA	0.00112518	2.27015e-06
434	3	11997659	12859209	1405	117	RA	0.00104521	4.44772e-08
448	3	27614909	28649810	1308	138	RA	0.00153898	1.15407e-12
463	3	45844192	47588461	2297	159	RA	0.000776736	8.44235e-05
474	3	61277588	62609818	1664	256	RA	0.00123092	8.2632e-07
478	3	65326752	66702084	1749	230	RA	0.00103458	7.11885e-06
482	3	69784970	71223281	1470	194	RA	0.00101908	5.70649e-06
511	3	104878978	106174685	1929	165	RA	0.00106214	1.47263e-07
512	3	106174686	107736519	2064	210	RA	0.000923431	2.20215e-05
539	3	133718494	135288394	2106	232	RA	0.00103935	1.43693e-05
540	3	135288395	137372141	1984	150	RA	0.000801465	1.20839e-05
584	3	186602046	187939199	1971	274	RA	0.00187256	5.80514e-11
610	4	10370667	11050119	1249	134	RA	0.000708807	6.82167e-05
624	4	25832019	27385580	1580	216	RA	0.00246019	1.64718e-20
626	4	28177793	28927438	1443	94	RA	0.000700674	1.32489e-05
637	4	36671802	37880860	2477	217	RA	0.000845277	6.43676e-05
638	4	37880861	38984838	1986	244	RA	0.00104777	1.35381e-05
639	4	38984839	39820061	1187	121	RA	0.000691968	7.44867e-05
645	4	43962562	45186767	2350	147	RA	0.00119891	1.37663e-08
727	4	139553761	141087047	1703	225	RA	0.00104317	1.21939e-05
785	5	9203856	10549029	1889	250	RA	0.00121949	1.35635e-06
786	5	10549030	11850850	1927	219	RA	0.00100662	1.36508e-05
791	5	16592320	17803477	1528	204	RA	0.000980537	9.40861e-06
794	5	20397014	21211399	1005	66	RA	0.000640542	5.03142e-06
803	5	30416067	31679464	1889	223	RA	0.000913229	5.30075e-05
811	5	40290852	41279590	1643	140	RA	0.000786106	3.99746e-05
815	5	45305567	46388848	931	19	RA	0.000445073	2.47057e-06
822	5	55221399	55968966	1260	201	RA	0.00353938	6.16377e-34
839	5	75959516	77290255	2017	234	RA	0.000906884	6.01972e-05
840	5	77290256	79005158	2098	182	RA	0.0009355	1.17666e-05
854	5	95117260	96467377	1910	187	RA	0.000914256	1.39979e-05
864	5	106389389	107265911	1340	181	RA	0.000905007	1.81057e-05
868	5	110819518	111983115	1948	176	RA	0.00080044	7.21163e-05
883	5	126054698	126992836	1559	96	RA	0.00068463	2.17636e-05
888	5	132554691	134556570	2436	284	RA	0.00237728	5.32559e-16
892	5	139408117	141253830	1957	213	RA	0.000954243	3.62066e-05
899	5	149850204	150981934	1768	178	RA	0.00106312	5.96467e-07
908	5	158484776	159663733	1711	190	RA	0.00141969	5.19533e-10
909	5	159663734	160519049	1437	179	RA	0.00135203	2.54851e-09
913	5	163781269	165289211	2056	226	RA	0.00105539	8.54737e-06
915	5	166863414	168342743	1770	261	RA	0.00137705	3.7151e-07
916	5	168342744	169506966	1975	231	RA	0.000922761	8.27494e-05
919	5	172285683	173606995	1989	240	RA	0.0010359	9.3377e-06
921	5	174662886	176180301	1524	215	RA	0.00122267	2.54569e-07
923	5	177659903	178595252	172	102	RA	0.000714381	2.59574e-05
926	6	63979	1380679	1844	258	RA	0.00192858	7.86287e-13
947	6	23192338	23939306	1327	149	RA	0.000862337	7.83342e-06
949	6	24950380	25684629	1684	158	RA	0.00174021	6.85689e-15
951	6	26396201	27261035	1009	67	RA	0.00244472	3.39318e-37
952	6	27261036	28666364	2015	83	RA	0.00368739	2.37081e-54
953	6	28666365	29529755	199	47	RA	0.00372151	4.28937e-65
954	6	29529756	29833843	242	31	RA	0.00625266	5.55258e-139
955	6	29833844	30070717	25	11	RA	0.00208776	1.18669e-41
958	6	31106494	31250556	185	34	RA	0.0120118	2.01497e-257
960	6	31320269	31427209	243	36	RA	0.0140441	1.72147e-306
962	6	32208902	32454577	49	17	RA	0.0139907	3.19542e-280
965	6	32586785	32629239	29	13	RA	0.0680314	0
966	6	32629240	32682213	32	8	RA	0.0149836	0
967	6	32682214	32897998	319	51	RA	0.0474097	0
969	6	33194976	33864262	1106	143	RA	0.0164111	0
970	6	33864263	34979270	1570	143	RA	0.00309693	9.98286e-36
971	6	34979271	36346353	1735	176	RA	0.00144685	7.24596e-10
972	6	36346354	37570051	1956	225	RA	0.00182851	3.83547e-13
980	6	45408422	46430701	1322	156	RA	0.000965376	2.19444e-06
1022	6	89974268	91097024	1307	173	RA	0.000953442	5.32762e-06
1026	6	93696826	95176337	2355	198	RA	0.000851618	8.76514e-05
1037	6	106053916	107309327	2157	233	RA	0.00162909	1.61297e-10
1043	6	113705004	115062811	1528	164	RA	0.000828446	7.43673e-05
1053	6	123854858	125365054	1938	235	RA	0.000930882	9.30229e-05
1063	6	137553213	138825721	2124	203	RA	0.00443536	6.63745e-52
1067	6	143083348	144791455	2046	244	RA	0.00142108	6.85181e-09
1082	6	158952061	159604052	1249	121	RA	0.00105047	2.61176e-08
1090	6	166853326	167714865	187	115	RA	0.00197001	7.77932e-20
1095	7	617320	1366972	1226	126	RA	0.000714768	6.68868e-05
1116	7	16739014	17596578	1368	238	RA	0.00115408	1.25419e-06
1124	7	24894120	25671575	1358	190	RA	0.000881853	3.29753e-05
1126	7	27351287	28890886	2131	252	RA	0.00186625	1.54733e-11
1137	7	40261241	41415925	1148	128	RA	0.000711097	5.2969e-05
1143	7	47253455	48363585	1706	221	RA	0.00089342	7.18717e-05
1146	7	49632427	50894508	2114	170	RA	0.00121131	2.34866e-08
1169	7	77663965	78685009	2056	218	RA	0.0010153	5.36912e-06
1185	7	98173565	99465540	1480	110	RA	0.000796463	4.56606e-06
1207	7	127903739	128779173	1477	120	RA	0.00127651	2.46942e-11
1208	7	128779174	130418704	2149	212	RA	0.00127269	5.32675e-08
1215	7	138755108	140217630	1888	212	RA	0.00112	1.69665e-06
1233	8	660415	1161824	1007	170	RA	0.00082001	7.05567e-05
1263	8	18668610	19488888	1629	229	RA	0.00104154	8.56682e-06
1269	8	23788495	24863243	1455	131	RA	0.000763341	3.83989e-05
1276	8	31134787	32454962	2423	183	RA	0.00100681	4.93587e-06
1304	8	68683824	70004665	2078	226	RA	0.00101892	2.1911e-05
1307	8	72013185	72917489	1414	197	RA	0.00176908	4.77799e-13
1314	8	79756170	81340231	2285	199	RA	0.00140746	8.26866e-09
1330	8	101448440	102548680	1348	186	RA	0.00130535	1.43003e-08
1337	8	108647464	109920827	1968	138	RA	0.000825458	1.00743e-07
1351	8	125453323	126766827	1831	219	RA	0.000941207	1.92145e-05
1355	8	130383564	131545725	1983	175	RA	0.000952949	6.24194e-06
1356	8	131545726	132534636	1781	180	RA	0.00113148	2.94256e-07
1358	8	133461552	134509448	1697	218	RA	0.00158462	2.15849e-10
1364	8	139404632	140355988	1439	183	RA	0.000864582	3.79532e-05
1377	9	4596615	5437591	1144	148	RA	0.000779526	6.69584e-05
1378	9	5437592	6859791	1978	224	RA	0.00130943	1.00678e-08
1381	9	8262304	9170120	1887	221	RA	0.00110722	1.75866e-06
1388	9	13512853	14244747	1275	196	RA	0.00098693	7.03456e-06
1411	9	33194893	34704544	1908	136	RA	0.000787486	1.73917e-05
1413	9	36749274	37687112	1221	178	RA	0.000945293	6.51264e-06
1458	9	113646150	114443475	1334	157	RA	0.000749367	7.41694e-05
1461	9	116159541	117054909	1391	192	RA	0.00106173	2.00592e-06
1472	9	128785783	129617771	1166	209	RA	0.00111107	1.86634e-06
1487	10	1872961	2637065	2055	189	RA	0.000873994	2.89836e-05
1489	10	3225337	3880322	1163	154	RA	0.00118057	2.08347e-08
1492	10	5396243	6234718	1564	225	RA	0.00223703	3.40946e-17
1493	10	6234719	6897037	1061	183	RA	0.00145959	3.79062e-10
1494	10	6897038	7659872	1457	208	RA	0.000894257	5.9948e-05
1495	10	7659873	8771920	2177	247	RA	0.00178785	2.93237e-11
1496	10	8771921	10081279	2149	171	RA	0.000825445	9.8683e-05
1499	10	11856925	12581571	1212	167	RA	0.000785986	4.92083e-05
1500	10	12581572	13208061	1092	186	RA	0.000859517	3.6891e-05
1503	10	14820756	15946677	1726	192	RA	0.000863878	8.63423e-05
1520	10	30919470	32457293	2012	175	RA	0.000913808	1.35769e-05
1544	10	62626466	64069687	2052	189	RA	0.00164807	3.51772e-12
1545	10	64069688	65400431	2000	150	RA	0.00125157	3.55413e-09
1561	10	81763231	82378048	1188	103	RA	0.00112303	4.22022e-10
1567	10	87287936	88443652	1794	180	RA	0.00113286	3.12197e-07
1568	10	88443653	89971628	1506	188	RA	0.000894869	4.71714e-05
1569	10	89971629	91021321	1596	195	RA	0.000897661	4.31674e-05
1573	10	94503300	95528160	1909	178	RA	0.00115944	1.78464e-07
1597	10	123856185	124894142	1740	211	RA	0.00148063	3.42123e-10
1613	11	2477450	3362508	898	196	RA	0.000999685	7.58532e-06
1624	11	11632651	12470449	1512	230	RA	0.00102735	1.00073e-05
1648	11	35500368	36331189	1126	173	RA	0.000846883	1.55268e-05
1649	11	36331190	37119024	1346	124	RA	0.000965153	3.53691e-07
1664	11	51581596	55477633	1290	10	RA	0.000551385	2.98917e-08
1671	11	60515106	61717117	1150	159	RA	0.00121804	1.11999e-08
1678	11	69713997	71242834	2467	246	RA	0.000949654	6.56862e-05
1699	11	92209169	93576641	1706	164	RA	0.000881241	1.17877e-05
1701	11	94384536	95327210	1187	160	RA	0.0011881	3.30774e-08
1724	11	118901214	120064528	1514	195	RA	0.000836297	7.04767e-05
1726	11	121208187	122589224	1719	204	RA	0.00103395	2.80016e-06
1733	11	128262551	129451784	1005	197	RA	0.00195449	5.62421e-14
1735	11	130500784	131424361	156	105	RA	0.000673436	4.82705e-05
1789	12	50344347	51769419	1598	76	RA	0.000701158	3.2873e-06
1793	12	55416803	56987105	1451	117	RA	0.000741725	2.51544e-05
1823	12	92061180	93487547	2107	205	RA	0.00118142	2.48095e-07
1841	12	111592382	113947983	2171	168	RA	0.00105306	8.28232e-07
1843	12	114685671	115439451	1288	177	RA	0.000863426	4.50231e-06
1844	12	115439452	116197675	1206	199	RA	0.000967717	1.84404e-05
1845	12	116197676	117091843	1282	196	RA	0.00101401	5.25329e-06
1852	12	124843769	126079935	1916	269	RA	0.000963916	2.99176e-05
1873	13	28587126	30068525	2072	200	RA	0.000891587	4.72789e-05
1883	13	40091624	41003943	1359	185	RA	0.00123743	9.46497e-08
1884	13	41003944	42037054	1069	105	RA	0.000664166	3.65186e-05
1914	13	74437636	75882384	2197	215	RA	0.00108082	3.6766e-06
1915	13	75882385	76671493	1389	147	RA	0.000844956	1.44902e-05
1932	13	91764205	93285142	2035	162	RA	0.000920635	9.10032e-06
1941	13	103050418	104378435	2327	224	RA	0.000932618	2.38018e-05
1945	13	107037865	108521978	2069	276	RA	0.00110405	2.8418e-05
1958	14	23985937	24906056	1021	154	RA	0.00080558	3.02537e-05
1966	14	33591114	34695195	1525	298	RA	0.00123689	1.63006e-06
1989	14	57460782	58447798	1452	148	RA	0.00084426	7.36443e-06
1992	14	60099483	61652816	1463	86	RA	0.000593394	4.77486e-05
1993	14	61652817	62717985	1489	205	RA	0.000925714	5.85598e-05
1999	14	68976913	69794542	1354	197	RA	0.000857261	5.6361e-05
2011	14	82524786	84087372	2534	227	RA	0.00110064	1.55851e-06
2018	14	90662837	92101228	2021	194	RA	0.000909066	3.72677e-05
2019	14	92101229	93386328	2072	237	RA	0.00114744	1.44336e-06
2021	14	94892241	95946792	2069	285	RA	0.00156567	1.04195e-08
2022	14	95946793	97174314	2065	242	RA	0.00110802	3.34217e-06
2024	14	98268392	98885322	1437	134	RA	0.00114804	1.39948e-08
2025	14	98885323	99474533	1332	150	RA	0.000826398	1.72584e-05
2042	15	30604120	32177320	1511	174	RA	0.000855958	2.95259e-05
2048	15	37962916	39238840	1716	211	RA	0.00145085	1.35983e-09
2071	15	67396521	69089815	1996	207	RA	0.00108163	1.79224e-06
2081	15	79998207	81077025	1720	230	RA	0.00111784	1.12554e-06
2083	15	82191078	84209760	1779	194	RA	0.00090354	4.64103e-05
2093	15	93707011	94565521	1554	240	RA	0.00108303	4.97994e-06
2115	16	11022543	11916631	1654	181	RA	0.00154523	1.7073e-11
2126	16	26154123	27443061	2043	275	RA	0.00174116	1.05653e-09
2150	16	72089512	73140781	1192	165	RA	0.000931739	3.75273e-06
2165	16	83778372	84440154	1684	269	RA	0.00136864	9.5351e-08
2166	16	84440155	85146805	1648	257	RA	0.0010214	1.26827e-05
2167	16	85146806	86058597	1021	230	RA	0.00154787	5.24287e-10
2168	16	86058598	86748867	1507	283	RA	0.00133397	1.20689e-07
2175	17	1480057	2699135	1279	199	RA	0.000829916	8.70965e-05
2177	17	3430441	4463971	1265	169	RA	0.00150779	3.52616e-11
2178	17	4463972	5573784	1768	163	RA	0.00114484	4.78142e-08
2179	17	5573785	6305078	1327	203	RA	0.000909667	2.0709e-05
2184	17	10572618	11778164	1504	200	RA	0.00100262	2.73173e-06
2198	17	31318754	32356061	1719	236	RA	0.00104904	6.13219e-06
2205	17	40233546	42348003	1942	171	RA	0.00108857	3.7525e-07
2206	17	42348004	43460500	1218	140	RA	0.000708142	8.66765e-05
2210	17	47516225	48722590	1210	240	RA	0.00106074	5.29472e-06
2212	17	49909299	51110385	1943	103	RA	0.000745856	1.16225e-05
2216	17	54950108	56245227	1456	253	RA	0.00138372	2.95268e-08
2218	17	58652810	60453120	1238	156	RA	0.000954755	2.82565e-06
2222	17	64438388	65582327	1692	235	RA	0.00106603	8.47474e-06
2227	17	70495120	71466953	1289	245	RA	0.00125745	2.62956e-07
2228	17	71466954	72383472	1359	248	RA	0.000977147	4.21719e-05
2231	17	74908267	75619256	1225	190	RA	0.00098707	3.82245e-06
2232	17	75619257	76596287	1469	249	RA	0.00100864	7.93581e-06
2244	18	5575813	6756496	1527	248	RA	0.00150727	4.8473e-09
2246	18	7862480	8788524	1569	198	RA	0.000889684	4.52123e-05
2247	18	8788525	9816164	1941	241	RA	0.000975188	4.10564e-05
2251	18	12735559	13641479	1346	183	RA	0.00196148	4.64902e-17
2298	18	70540350	71491860	1587	195	RA	0.00107142	2.33507e-06
2312	19	4741719	5478684	1036	191	RA	0.0011915	8.63378e-08
2313	19	5478685	6455428	1473	147	RA	0.000899713	3.89797e-06
2314	19	6455429	7249359	1236	188	RA	0.00085044	4.90656e-05
2318	19	10028841	11681978	2020	225	RA	0.00418249	6.89848e-41
2324	19	16079007	17045963	1240	118	RA	0.000929311	5.82153e-07
2328	19	19749167	20485499	1215	85	RA	0.000671205	1.26348e-05
2342	19	35649344	36638122	1303	189	RA	0.000992956	1.04139e-05
2351	19	45040933	45893307	912	148	RA	0.00085387	1.35549e-05
2358	19	51259179	51903804	879	167	RA	0.00084079	2.99652e-05
2365	19	55714086	56411086	148	104	RA	0.000703015	1.60963e-05
2374	20	4591848	5379450	1200	165	RA	0.000862435	1.38957e-05
2380	20	10279604	11257012	1545	187	RA	0.00116491	3.96569e-07
2390	20	18959420	19957928	1640	208	RA	0.000873811	9.22845e-05
2400	20	33890061	35990261	1661	149	RA	0.00134671	7.65648e-10
2415	20	51533751	52411532	954	199	RA	0.000836083	9.44914e-05
2435	21	19479025	20407307	1591	183	RA	0.00104448	2.91357e-06
2447	21	32202240	33270272	1578	174	RA	0.000806481	4.34614e-05
2449	21	34383795	35729261	1687	235	RA	0.00179211	5.90051e-11
2450	21	35729262	37303548	2177	238	RA	0.00169246	1.50717e-10
2463	22	17587475	18535225	1478	203	RA	0.00103449	4.20567e-06
2472	22	27192924	27952441	1392	264	RA	0.00142153	2.53652e-08
2473	22	27952442	29457601	1659	189	RA	0.000848069	3.08125e-05
2482	22	37364005	38718589	1760	226	RA	0.00142832	7.53746e-09
2483	22	38718590	40378783	1809	194	RA	0.00203045	1.19421e-15
3	1	2215496	2983519	740	106	RA	0.000809672	3.28775e-06
10	1	7711795	8580987	1186	156	RA	0.000836584	4.81378e-06
14	1	11709174	13481025	1341	159	RA	0.000900085	2.03718e-06
19	1	17557747	18427820	1396	168	RA	0.000799237	9.88161e-05
26	1	23907046	25885138	2013	213	RA	0.00136458	1.92686e-08
36	1	38474037	40200950	2193	221	RA	0.00101769	1.5385e-05
40	1	43512670	45167235	1848	192	RA	0.000967796	7.20348e-06
58	1	67761891	68633860	1135	150	RA	0.000809595	2.05949e-05
60	1	69438910	70992905	1963	196	RA	0.000894657	4.01443e-05
88	1	101188316	102424611	1925	175	RA	0.00123411	6.4495e-08
95	1	107874654	109271449	1904	178	RA	0.000837714	5.50424e-05
99	1	112489249	113418037	1061	156	RA	0.000986729	1.54774e-06
100	1	113418038	114664387	1297	140	RA	0.0103463	2.08873e-198
101	1	114664388	116207297	2409	212	RA	0.00122749	1.30785e-07
103	1	117046312	118118667	1148	131	RA	0.00106744	3.8659e-08
112	1	153410810	154685545	1150	127	RA	0.00081923	5.97808e-06
113	1	154685546	156813845	1624	203	RA	0.00126675	2.47334e-08
114	1	156813846	158081627	1884	193	RA	0.00139849	1.59651e-09
118	1	161054077	161945442	1244	115	RA	0.00083245	1.84791e-06
122	1	164726580	165553812	1392	191	RA	0.00108131	2.10846e-06
125	1	167163955	168179086	1259	171	RA	0.00157409	8.21072e-12
152	1	197935822	199263389	2069	165	RA	0.000815698	5.08054e-05
154	1	200134006	201067952	1318	143	RA	0.00109569	4.31325e-08
155	1	201067953	202583884	2048	267	RA	0.00126218	7.12877e-07
158	1	205009624	205917548	1468	172	RA	0.000862509	4.98274e-05
179	1	230227248	231287764	2180	245	RA	0.000903445	3.78219e-05
185	1	235097114	236199671	1080	113	RA	0.00115009	2.18737e-09
217	2	11995766	12732506	1212	201	RA	0.00108272	1.25491e-06
232	2	29627933	30575619	1404	171	RA	0.00113772	2.01993e-07
250	2	45189469	45850047	1024	189	RA	0.00129405	2.80462e-09
268	2	60775067	62429910	1881	189	RA	0.00111436	6.20916e-07
271	2	64696090	65938002	1698	196	RA	0.00139507	3.17611e-09
274	2	67979829	68877774	1370	131	RA	0.000849382	7.51108e-06
275	2	68877775	70756283	2376	217	RA	0.00175802	6.36988e-13
284	2	78080058	79019676	1472	111	RA	0.000713456	1.79612e-05
286	2	79900056	80737811	1112	200	RA	0.000905047	1.13211e-05
297	2	100202437	101556799	2005	160	RA	0.00188365	8.89832e-16
304	2	108417774	110097868	2088	171	RA	0.00117789	4.01069e-08
305	2	110097869	112644828	1532	157	RA	0.00115342	2.25034e-08
306	2	112644829	113930668	1661	160	RA	0.000795254	5.40098e-05
312	2	119635490	121073752	2017	186	RA	0.00115784	7.43761e-08
325	2	133352951	134359059	1242	172	RA	0.000798945	8.29386e-05
340	2	152497376	153999309	2163	162	RA	0.00117691	4.01744e-08
360	2	174927564	176734750	2276	204	RA	0.00121118	2.86932e-07
374	2	191051955	193033982	2239	205	RA	0.00215572	1.42699e-17
380	2	201324133	202504862	1527	135	RA	0.000707969	9.72939e-05
384	2	206821200	207726594	1246	150	RA	0.000719359	8.04706e-05
424	3	2140012	3128152	1699	268	RA	0.000991278	3.12565e-05
431	3	8664893	9970731	1612	262	RA	0.00110921	1.24725e-05
448	3	27614909	28649810	1299	138	RA	0.00140226	3.58507e-11
463	3	45844192	47588461	2287	157	RA	0.000806628	4.47082e-05
474	3	61277588	62609818	1653	255	RA	0.00124168	7.55131e-07
478	3	65326752	66702084	1739	229	RA	0.000967113	1.81237e-05
482	3	69784970	71223281	1453	191	RA	0.00105297	2.72247e-06
511	3	104878978	106174685	1921	165	RA	0.00104793	1.92129e-07
512	3	106174686	107736519	2053	209	RA	0.000985284	8.53874e-06
539	3	133718494	135288394	2095	230	RA	0.0009881	3.33686e-05
540	3	135288395	137372141	1977	148	RA	0.000794258	1.09315e-05
561	3	159478752	160584961	1429	107	RA	0.000787348	5.07971e-06
584	3	186602046	187939199	1959	272	RA	0.00169924	1.62151e-09
585	3	187939200	189451805	1953	227	RA	0.000961758	4.42887e-05
610	4	10370667	11050119	1242	133	RA	0.000762895	2.47236e-05
626	4	28177793	28927438	1440	94	RA	0.000649697	3.85882e-05
629	4	30455556	31395092	1824	132	RA	0.00074348	3.10112e-05
637	4	36671802	37880860	2462	216	RA	0.000831727	7.47542e-05
638	4	37880861	38984838	1967	242	RA	0.00106183	1.13181e-05
648	4	47408266	49325138	2025	160	RA	0.00076959	9.39156e-05
668	4	73258295	74885900	1993	119	RA	0.000672897	9.37318e-05
692	4	102544804	104384534	2233	174	RA	0.00184233	3.24402e-14
727	4	139553761	141087047	1696	225	RA	0.00101603	1.82705e-05
786	5	10549030	11850850	1914	216	RA	0.00103767	7.20358e-06
791	5	16592320	17803477	1522	204	RA	0.000986672	8.56819e-06
794	5	20397014	21211399	1001	66	RA	0.000636349	5.55995e-06
806	5	33971057	35157146	1670	157	RA	0.000949116	4.06816e-06
811	5	40290852	41279590	1635	138	RA	0.000819087	1.9356e-05
822	5	55221399	55968966	1254	199	RA	0.00343919	9.33489e-33
839	5	75959516	77290255	2009	232	RA	0.000916827	4.67311e-05
854	5	95117260	96467377	1902	186	RA	0.000916451	1.20348e-05
883	5	126054698	126992836	1554	96	RA	0.000685704	2.13063e-05
888	5	132554691	134556570	2418	282	RA	0.00226236	7.38414e-15
892	5	139408117	141253830	1939	211	RA	0.000901952	8.26284e-05
899	5	149850204	150981934	1758	177	RA	0.00104173	1.00446e-06
907	5	157191082	158484775	1872	202	RA	0.00119753	2.34306e-07
909	5	159663734	160519049	1432	178	RA	0.00134121	3.21521e-09
913	5	163781269	165289211	2037	224	RA	0.000991343	2.61984e-05
915	5	166863414	168342743	1754	260	RA	0.0015343	2.40554e-08
918	5	170898341	172285682	1881	266	RA	0.00111334	7.42824e-06
919	5	172285683	173606995	1965	237	RA	0.00091706	5.50206e-05
921	5	174662886	176180301	1517	215	RA	0.00127059	1.02388e-07
923	5	177659903	178595252	171	102	RA	0.000706829	2.99749e-05
926	6	63979	1380679	1827	255	RA	0.00177807	2.19566e-11
931	6	5378214	6621937	1934	265	RA	0.00117848	2.61658e-06
947	6	23192338	23939306	1320	148	RA	0.000860933	8.1972e-06
948	6	23939307	24950379	1897	203	RA	0.00122891	5.1651e-08
949	6	24950380	25684629	1675	157	RA	0.00172832	7.94198e-15
951	6	26396201	27261035	1003	66	RA	0.00243947	2.44461e-37
952	6	27261036	28666364	2008	83	RA	0.00368607	2.38969e-54
953	6	28666365	29529755	197	47	RA	0.0037181	1.08479e-64
954	6	29529756	29833843	242	31	RA	0.00625266	5.55258e-139
955	6	29833844	30070717	25	11	RA	0.00208776	1.18669e-41
956	6	30070718	30715006	30	17	RA	0.00208512	1.97543e-38
957	6	30715007	31106493	251	61	RA	0.0176308	0
958	6	31106494	31250556	185	34	RA	0.0120118	2.01497e-257
959	6	31250557	31320268	85	16	RA	0.00473395	8.26057e-94
960	6	31320269	31427209	236	35	RA	0.0138247	2.75065e-300
961	6	31427210	32208901	588	104	RA	0.0530795	0
962	6	32208902	32454577	49	17	RA	0.0139907	3.19542e-280
964	6	32539568	32586784	40	9	RA	0.0392404	0
965	6	32586785	32629239	29	13	RA	0.0680314	0
966	6	32629240	32682213	31	8	RA	0.0150343	0
967	6	32682214	32897998	319	51	RA	0.0474097	0
968	6	32897999	33194975	284	59	RA	0.0221754	0
969	6	33194976	33864262	1098	143	RA	0.0167503	0
970	6	33864263	34979270	1562	142	RA	0.00318896	2.8123e-37
971	6	34979271	36346353	1731	176	RA	0.0014887	2.88308e-10
978	6	43770627	44596897	1118	218	RA	0.00122742	1.30765e-07
980	6	45408422	46430701	1309	151	RA	0.00102249	5.37273e-07
1022	6	89974268	91097024	1298	173	RA	0.000969611	3.70224e-06
1037	6	106053916	107309327	2148	232	RA	0.00161639	2.04602e-10
1043	6	113705004	115062811	1522	163	RA	0.000811052	9.19375e-05
1063	6	137553213	138825721	2106	199	RA	0.00437358	2.49179e-51
1067	6	143083348	144791455	2030	242	RA	0.00152328	9.98812e-10
1073	6	150635316	151629954	2049	233	RA	0.00101736	6.19925e-06
1082	6	158952061	159604052	1246	121	RA	0.00105573	2.26808e-08
1089	6	165835954	166853325	136	99	RA	0.000707275	2.05064e-05
1090	6	166853326	167714865	187	115	RA	0.00197001	7.77932e-20
1113	7	13676748	15013694	1959	239	RA	0.00111959	3.11322e-06
1116	7	16739014	17596578	1361	238	RA	0.00106568	5.81857e-06
1124	7	24894120	25671575	1349	189	RA	0.000838911	7.11796e-05
1125	7	25671576	27351286	2388	223	RA	0.000937047	2.69337e-05
1126	7	27351287	28890886	2122	250	RA	0.00180594	4.08769e-11
1137	7	40261241	41415925	1145	127	RA	0.000716003	4.58375e-05
1146	7	49632427	50894508	2108	169	RA	0.00121341	2.10058e-08
1171	7	80055722	81533566	1945	192	RA	0.000846587	9.42468e-05
1185	7	98173565	99465540	1469	110	RA	0.000800257	4.13618e-06
1207	7	127903739	128779173	1467	118	RA	0.00129159	1.19763e-11
1215	7	138755108	140217630	1873	210	RA	0.00119285	3.76115e-07
1264	8	19488889	20135628	1280	177	RA	0.000781547	6.8683e-05
1274	8	28344177	29744540	1508	186	RA	0.000935904	1.35025e-05
1276	8	31134787	32454962	2404	182	RA	0.000988757	7.2707e-06
1304	8	68683824	70004665	2065	223	RA	0.000973661	3.88552e-05
1307	8	72013185	72917489	1407	197	RA	0.00176701	4.75154e-13
1314	8	79756170	81340231	2274	198	RA	0.00140522	8.19419e-09
1337	8	108647464	109920827	1957	137	RA	0.000812401	1.52455e-07
1351	8	125453323	126766827	1820	216	RA	0.000901922	3.06072e-05
1355	8	130383564	131545725	1973	175	RA	0.000914245	1.13592e-05
1358	8	133461552	134509448	1681	216	RA	0.00144599	3.72285e-09
1377	9	4596615	5437591	1140	148	RA	0.000762513	9.01438e-05
1378	9	5437592	6859791	1971	223	RA	0.00129126	1.37093e-08
1381	9	8262304	9170120	1873	219	RA	0.00111403	1.40748e-06
1388	9	13512853	14244747	1263	195	RA	0.000963216	9.20344e-06
1398	9	21674033	23091193	1977	211	RA	0.0011558	6.31745e-07
1411	9	33194893	34704544	1900	135	RA	0.000794699	1.37835e-05
1412	9	34704545	36749273	2291	245	RA	0.00130875	7.21265e-08
1413	9	36749274	37687112	1217	178	RA	0.000943801	6.85287e-06
1458	9	113646150	114443475	1327	156	RA	0.000766656	5.44788e-05
1461	9	116159541	117054909	1390	192	RA	0.00106327	1.95578e-06
1467	9	122677720	124119883	1332	158	RA	0.000854392	1.77097e-05
1470	9	126092932	127184582	1522	161	RA	0.000879547	7.67233e-06
1486	10	1329233	1872960	984	165	RA	0.00100171	2.51921e-06
1487	10	1872961	2637065	2035	189	RA	0.000899663	1.89942e-05
1489	10	3225337	3880322	1151	153	RA	0.00120111	1.0942e-08
1493	10	6234719	6897037	1056	182	RA	0.00141511	9.13612e-10
1494	10	6897038	7659872	1448	207	RA	0.000889956	6.70878e-05
1499	10	11856925	12581571	1208	166	RA	0.00079665	3.79223e-05
1500	10	12581572	13208061	1084	184	RA	0.000896363	1.90657e-05
1501	10	13208062	14008135	1342	244	RA	0.00122109	5.25286e-07
1503	10	14820756	15946677	1716	192	RA	0.00096324	1.89292e-05
1512	10	24489448	25577761	1288	202	RA	0.00121514	3.25323e-07
1544	10	62626466	64069687	2041	188	RA	0.00166118	2.32245e-12
1545	10	64069688	65400431	1993	148	RA	0.00121841	5.45329e-09
1552	10	71050505	71672997	1239	209	RA	0.000913956	3.04244e-05
1554	10	72659224	73514214	1502	236	RA	0.000986708	8.97718e-05
1561	10	81763231	82378048	1186	103	RA	0.0011207	4.5872e-10
1567	10	87287936	88443652	1782	180	RA	0.00108232	9.79131e-07
1569	10	89971629	91021321	1584	193	RA	0.000911563	3.55655e-05
1597	10	123856185	124894142	1726	210	RA	0.00146605	4.68768e-10
1598	10	124894143	125798319	1673	214	RA	0.00105063	1.21758e-06
1601	10	127997709	129134738	1367	202	RA	0.0012375	8.37322e-08
1603	10	129831970	130694008	1487	237	RA	0.00136181	2.12723e-08
1613	11	2477450	3362508	895	196	RA	0.00102721	4.65688e-06
1624	11	11632651	12470449	1500	227	RA	0.000910504	7.90461e-05
1649	11	36331190	37119024	1342	124	RA	0.000965212	3.52476e-07
1664	11	51581596	55477633	1260	10	RA	0.000542981	4.20171e-08
1677	11	68887345	69713996	1217	170	RA	0.00087548	1.20193e-05
1699	11	92209169	93576641	1702	164	RA	0.000885522	1.05772e-05
1702	11	95327211	96150134	1257	180	RA	0.000809117	9.9527e-05
1716	11	107846825	109891837	2052	167	RA	0.000791531	7.60686e-05
1723	11	117295642	118901213	2319	261	RA	0.00118837	2.37641e-06
1724	11	118901214	120064528	1509	195	RA	0.000857261	5.28778e-05
1726	11	121208187	122589224	1709	203	RA	0.00105071	1.90729e-06
1733	11	128262551	129451784	1000	194	RA	0.00189388	1.98186e-13
1789	12	50344347	51769419	1591	75	RA	0.000625207	2.35087e-05
1793	12	55416803	56987105	1443	116	RA	0.000757569	1.75429e-05
1805	12	70097806	71177961	2086	160	RA	0.000804384	6.73544e-05
1838	12	108183189	109031819	1391	137	RA	0.000775029	1.41207e-05
1844	12	115439452	116197675	1203	198	RA	0.000954998	2.11419e-05
1845	12	116197676	117091843	1267	193	RA	0.000940297	2.06866e-05
1852	12	124843769	126079935	1900	266	RA	0.00100842	1.22783e-05
1872	13	27392006	28587125	2073	221	RA	0.00128564	5.95123e-08
1873	13	28587126	30068525	2063	199	RA	0.000914808	3.33846e-05
1874	13	30068526	31433218	2285	238	RA	0.00179268	8.13808e-13
1884	13	41003944	42037054	1061	103	RA	0.000666084	3.12163e-05
1893	13	50419897	51554236	1513	161	RA	0.0010065	1.06659e-06
1914	13	74437636	75882384	2177	214	RA	0.00112198	1.61374e-06
1915	13	75882385	76671493	1387	147	RA	0.000853254	1.21686e-05
1941	13	103050418	104378435	2314	223	RA	0.000855877	6.57319e-05
1958	14	23985937	24906056	1011	152	RA	0.00079686	3.29248e-05
1966	14	33591114	34695195	1513	297	RA	0.00120393	3.62852e-06
1989	14	57460782	58447798	1446	148	RA	0.000840514	7.85535e-06
1993	14	61652817	62717985	1480	204	RA	0.00092809	5.28606e-05
1998	14	67891840	68976912	1390	127	RA	0.000825115	5.84969e-06
1999	14	68976913	69794542	1348	197	RA	0.000840376	7.31205e-05
2011	14	82524786	84087372	2522	225	RA	0.00104054	4.82931e-06
2018	14	90662837	92101228	2004	192	RA	0.000955907	1.50932e-05
2019	14	92101229	93386328	2058	236	RA	0.00114623	1.57372e-06
2021	14	94892241	95946792	2053	284	RA	0.00166331	1.81818e-09
2022	14	95946793	97174314	2054	241	RA	0.00111166	3.36045e-06
2025	14	98885323	99474533	1315	150	RA	0.00083033	1.51647e-05
2042	15	30604120	32177320	1504	172	RA	0.000898113	1.29604e-05
2049	15	39238841	40604780	1729	191	RA	0.000834098	3.68767e-05
2055	15	47693317	49260006	1558	156	RA	0.000934851	2.80124e-06
2071	15	67396521	69089815	1988	206	RA	0.00109966	1.35711e-06
2072	15	69089816	70767983	2025	250	RA	0.00273933	8.63513e-21
2081	15	79998207	81077025	1710	228	RA	0.00100424	9.09831e-06
2083	15	82191078	84209760	1773	193	RA	0.000885481	6.63007e-05
2093	15	93707011	94565521	1546	239	RA	0.00111237	2.98705e-06
2126	16	26154123	27443061	2027	274	RA	0.00171222	1.50825e-09
2128	16	29043178	31384210	1115	115	RA	0.000828304	2.9669e-06
2150	16	72089512	73140781	1182	165	RA	0.000934988	3.45069e-06
2157	16	77739133	78280636	1407	189	RA	0.000977779	5.61744e-06
2158	16	78280637	78973580	1868	250	RA	0.000985325	1.4128e-05
2165	16	83778372	84440154	1675	269	RA	0.00129659	3.10658e-07
2166	16	84440155	85146805	1641	256	RA	0.00101277	1.48527e-05
2167	16	85146806	86058597	1009	228	RA	0.00144338	3.6187e-09
2168	16	86058598	86748867	1499	282	RA	0.00128824	2.54387e-07
2175	17	1480057	2699135	1273	198	RA	0.000836673	7.65897e-05
2178	17	4463972	5573784	1755	163	RA	0.00117943	2.61617e-08
2179	17	5573785	6305078	1320	201	RA	0.000860398	5.08978e-05
2191	17	17326541	18900978	1303	106	RA	0.000709782	3.0971e-05
2198	17	31318754	32356061	1710	234	RA	0.000945309	2.81266e-05
2203	17	37361179	38880481	1518	107	RA	0.000823664	1.85831e-06
2206	17	42348004	43460500	1211	140	RA	0.000724984	6.54718e-05
2210	17	47516225	48722590	1200	239	RA	0.000984806	2.02155e-05
2218	17	58652810	60453120	1229	153	RA	0.000977422	1.59035e-06
2227	17	70495120	71466953	1278	243	RA	0.00126537	2.34749e-07
2228	17	71466954	72383472	1343	246	RA	0.00100438	1.9996e-05
2232	17	75619257	76596287	1454	247	RA	0.00104295	3.8958e-06
2244	18	5575813	6756496	1509	245	RA	0.00141309	3.29806e-08
2251	18	12735559	13641479	1336	182	RA	0.00203179	1.06458e-17
2262	18	28792735	30401128	2139	197	RA	0.00115343	2.89783e-07
2293	18	65294196	66407960	2114	183	RA	0.000930483	1.21828e-05
2298	18	70540350	71491860	1578	193	RA	0.00112096	1.00991e-06
2312	19	4741719	5478684	1027	190	RA	0.00116333	1.40836e-07
2313	19	5478685	6455428	1463	146	RA	0.000918437	2.54152e-06
2314	19	6455429	7249359	1230	187	RA	0.000908962	1.83862e-05
2318	19	10028841	11681978	2011	224	RA	0.00419208	7.09695e-41
2324	19	16079007	17045963	1230	117	RA	0.000803327	6.88119e-06
2327	19	18504868	19749166	1292	129	RA	0.000909442	1.03462e-06
2342	19	35649344	36638122	1296	188	RA	0.000942494	2.09532e-05
2351	19	45040933	45893307	908	148	RA	0.000872266	1.0061e-05
2358	19	51259179	51903804	878	167	RA	0.000842218	2.92727e-05
2365	19	55714086	56411086	147	103	RA	0.000719918	1.06301e-05
2374	20	4591848	5379450	1191	162	RA	0.000897547	5.67763e-06
2375	20	5379451	6128358	1213	167	RA	0.000864655	2.65603e-05
2408	20	44072211	45673603	2313	242	RA	0.00133396	1.09032e-07
2415	20	51533751	52411532	941	198	RA	0.000862413	5.83327e-05
2435	21	19479025	20407307	1578	182	RA	0.00102458	3.85868e-06
2449	21	34383795	35729261	1679	234	RA	0.0017675	1.00014e-10
2450	21	35729262	37303548	2169	236	RA	0.00174152	3.89942e-11
2455	21	41344743	42187152	1474	180	RA	0.000998821	2.82883e-06
2463	22	17587475	18535225	1470	202	RA	0.000973304	1.24506e-05
2472	22	27192924	27952441	1381	262	RA	0.00139566	5.1179e-08
2473	22	27952442	29457601	1640	187	RA	0.000823259	4.32518e-05
2480	22	35368342	36135968	1215	153	RA	0.0007411	9.87189e-05
2482	22	37364005	38718589	1753	225	RA	0.00146984	3.5032e-09
2483	22	38718590	40378783	1800	193	RA	0.00199227	2.65523e-15
4	1	2983520	3582047	811	155	SLE	0.00639853	6.48888e-07
7	1	4773404	5362404	1154	174	SLE	0.00923585	3.0474e-10
9	1	6136815	7711794	2116	232	SLE	0.0063574	1.10332e-05
11	1	8580988	9475966	1055	187	SLE	0.00633152	2.4601e-05
21	1	19238925	20556202	2156	202	SLE	0.00702031	1.56438e-06
24	1	22145630	22740287	1138	148	SLE	0.00490015	6.15254e-05
35	1	36855140	38474036	2207	229	SLE	0.0078746	3.84565e-07
46	1	53114187	54771293	2339	207	SLE	0.0084981	4.30556e-08
48	1	55727135	56799636	1814	164	SLE	0.005562	1.7376e-05
52	1	59889046	61377615	1872	202	SLE	0.00711634	2.14535e-07
53	1	61377616	62778733	2046	249	SLE	0.00708595	1.96858e-06
58	1	67761891	68633860	1137	152	SLE	0.00529532	2.1694e-05
60	1	69438910	70992905	1975	197	SLE	0.00532783	5.95728e-05
73	1	84728348	86017267	2183	213	SLE	0.00758809	2.95992e-07
79	1	90941550	91870059	1320	142	SLE	0.00514177	3.15675e-05
80	1	91870060	92904465	1369	137	SLE	0.00472447	7.93753e-05
95	1	107874654	109271449	1915	180	SLE	0.00860813	6.20313e-09
98	1	111134063	112489248	2338	244	SLE	0.00694647	5.42957e-06
101	1	114664388	116207297	2421	213	SLE	0.00931093	2.03029e-09
110	1	151146408	152535630	1294	123	SLE	0.00468836	8.85657e-05
113	1	154685546	156813845	1632	204	SLE	0.00644917	1.06358e-05
114	1	156813846	158081627	1888	194	SLE	0.0103061	4.19225e-11
117	1	159882516	161054076	1488	192	SLE	0.00601622	1.53496e-05
119	1	161945443	163141862	1994	221	SLE	0.0124747	6.76112e-14
130	1	172465154	173582511	1177	145	SLE	0.0164178	5.16804e-25
131	1	173582512	175385220	2115	99	SLE	0.0046619	1.52349e-05
133	1	176449097	177746472	1570	140	SLE	0.0075174	2.8696e-08
152	1	197935822	199263389	2083	166	SLE	0.0105096	4.26836e-12
155	1	201067953	202583884	2063	270	SLE	0.0113327	2.92014e-11
159	1	205917549	208162951	1772	194	SLE	0.00957169	3.76819e-10
160	1	208162952	209711169	2023	269	SLE	0.00579806	7.29371e-05
164	1	213958293	214783872	1217	159	SLE	0.00532975	4.63732e-05
179	1	230227248	231287764	2188	246	SLE	0.00743007	6.23711e-07
186	1	236199672	237409458	1987	200	SLE	0.00668854	2.93901e-06
190	1	239332149	240248508	1410	164	SLE	0.00548677	2.50996e-05
204	2	1875061	2680063	1232	173	SLE	0.00666912	2.69838e-06
207	2	4016105	4766969	1236	127	SLE	0.0065772	2.8937e-07
211	2	7108209	7966709	1332	117	SLE	0.00507859	1.25544e-05
212	2	7966710	8978798	1088	163	SLE	0.0074215	1.84772e-07
221	2	15721704	17241115	2137	250	SLE	0.00915074	7.77621e-08
232	2	29627933	30575619	1418	174	SLE	0.00879606	1.52355e-09
251	2	45850048	46499326	1113	237	SLE	0.0138251	1.06207e-15
252	2	46499327	47320114	1528	214	SLE	0.00699139	2.62723e-06
267	2	59251997	60775066	2100	262	SLE	0.00741598	2.7594e-06
268	2	60775067	62429910	1887	190	SLE	0.00656898	5.51294e-06
271	2	64696090	65938002	1707	198	SLE	0.0088201	3.95217e-09
286	2	79900056	80737811	1117	200	SLE	0.00589727	5.34562e-05
290	2	84395900	85992794	2188	192	SLE	0.00649123	6.62688e-07
306	2	112644829	113930668	1667	160	SLE	0.0119626	6.37288e-14
311	2	118663654	119635489	1501	160	SLE	0.00878701	1.80709e-09
312	2	119635490	121073752	2031	188	SLE	0.00973545	8.49748e-11
313	2	121073753	122026817	1255	179	SLE	0.00660733	4.38763e-06
326	2	134359060	135160197	1273	167	SLE	0.00513326	5.13414e-05
335	2	144503689	145977920	1154	161	SLE	0.00569893	9.10082e-06
338	2	149568876	151428988	2262	223	SLE	0.00673687	3.95912e-06
345	2	159040980	160200379	2182	169	SLE	0.00538687	8.73738e-05
359	2	174118390	174927563	1132	169	SLE	0.00769057	9.62762e-08
373	2	189882703	191051954	1635	82	SLE	0.00428211	1.98336e-05
374	2	191051955	193033982	2252	207	SLE	0.0419794	4.40187e-84
383	2	205038120	206821199	1865	266	SLE	0.00666624	2.13079e-05
407	2	230541093	231847386	2026	216	SLE	0.00586691	1.96142e-05
424	3	2140012	3128152	1703	269	SLE	0.00824199	9.53155e-07
426	3	4109394	4835083	1191	179	SLE	0.00736633	1.15249e-07
428	3	5496183	6421145	1999	221	SLE	0.0086116	4.46368e-08
435	3	12859210	14312007	2193	255	SLE	0.0122699	7.60483e-13
441	3	20754843	21790867	2041	213	SLE	0.00652907	3.00987e-06
449	3	28649811	29877022	2348	244	SLE	0.00856729	8.09364e-08
463	3	45844192	47588461	2297	159	SLE	0.0063251	1.61841e-06
470	3	56954879	58557718	2332	158	SLE	0.00746178	6.68332e-08
471	3	58557719	59998583	1942	221	SLE	0.0112963	1.31746e-11
472	3	59998584	60571139	1236	191	SLE	0.00656894	3.63372e-06
474	3	61277588	62609818	1663	256	SLE	0.00641816	2.92853e-05
475	3	62609819	63670803	1950	179	SLE	0.00819029	4.23611e-08
481	3	68319771	69784969	2337	225	SLE	0.00669732	1.71178e-05
483	3	71223282	72334704	1428	258	SLE	0.00674748	5.3598e-06
507	3	100552523	101906989	1944	134	SLE	0.00462397	8.75023e-05
508	3	101906990	103450271	2380	120	SLE	0.0058885	2.05744e-06
518	3	112408514	113657665	2139	157	SLE	0.00652514	8.36645e-07
519	3	113657666	115649909	2063	238	SLE	0.0101494	1.71744e-10
539	3	133718494	135288394	2100	231	SLE	0.006933	5.1203e-06
551	3	148638309	149998411	2211	224	SLE	0.00975083	1.28217e-09
561	3	159478752	160584961	1435	108	SLE	0.00647479	2.19642e-08
569	3	167118894	168972662	2158	176	SLE	0.00719462	4.76053e-07
571	3	170174579	171134849	1207	166	SLE	0.00724946	2.66534e-07
573	3	172004761	173415591	1743	188	SLE	0.00711789	1.92588e-06
581	3	183203156	184524268	1864	238	SLE	0.00878049	1.42338e-08
583	3	185709997	186602045	1057	195	SLE	0.00852438	6.46031e-09
584	3	186602046	187939199	1968	273	SLE	0.00915301	1.82894e-07
585	3	187939200	189451805	1959	228	SLE	0.00566763	7.24663e-05
601	4	4266179	5051834	1380	203	SLE	0.00525869	3.09559e-05
604	4	7135820	7726034	1287	256	SLE	0.00864602	2.82439e-07
619	4	20086839	21416380	2186	229	SLE	0.0102423	1.63066e-09
624	4	25832019	27385580	1579	216	SLE	0.00666184	4.9101e-06
638	4	37880861	38984838	1982	244	SLE	0.00915143	2.52026e-08
653	4	57103101	58011085	1593	166	SLE	0.00510638	6.94774e-05
698	4	109978983	111733579	2257	212	SLE	0.0102348	4.56769e-10
727	4	139553761	141087047	1701	224	SLE	0.00636012	9.58327e-06
728	4	141087048	142807914	2177	199	SLE	0.00651141	4.64095e-06
739	4	156520289	157597309	2358	189	SLE	0.00559285	5.4387e-05
765	4	182065647	182946258	1786	240	SLE	0.00700216	3.8599e-06
766	4	182946259	183603892	1105	196	SLE	0.00606862	1.70773e-05
777	5	1206610	2106885	1598	220	SLE	0.00722601	2.52785e-06
778	5	2106886	2960068	1675	222	SLE	0.00717991	3.83189e-06
781	5	4636543	5828694	2097	239	SLE	0.0084289	6.44858e-08
782	5	5828695	6936733	2331	245	SLE	0.0127718	6.28679e-14
785	5	9203856	10549029	1887	249	SLE	0.00910224	9.65394e-09
801	5	28315654	29593755	2196	137	SLE	0.00493225	3.22213e-05
802	5	29593756	30416066	2044	111	SLE	0.00446647	4.53128e-05
804	5	31679465	32727914	1539	211	SLE	0.0107004	4.46199e-11
806	5	33971057	35157146	1678	159	SLE	0.00536974	6.46798e-05
809	5	37925488	39438985	1977	197	SLE	0.00526266	8.98675e-05
822	5	55221399	55968966	1259	201	SLE	0.00621507	2.17089e-05
832	5	65606871	67096191	2079	188	SLE	0.00703878	1.2361e-06
841	5	79005159	80448225	2239	246	SLE	0.00702801	1.67047e-05
861	5	102903986	103788460	1205	167	SLE	0.00495211	7.27597e-05
873	5	116208001	117348497	1901	194	SLE	0.00666875	2.47282e-06
887	5	130573818	132554690	1792	119	SLE	0.00424755	8.7321e-05
888	5	132554691	134556570	2434	283	SLE	0.0137296	1.13837e-13
889	5	134556571	135344943	1230	141	SLE	0.00522811	4.95392e-05
890	5	135344944	136949853	2128	210	SLE	0.00961329	1.39085e-09
893	5	141253831	142532956	1750	217	SLE	0.00673391	1.52399e-05
897	5	147180172	148662214	2048	170	SLE	0.00498599	7.59064e-05
898	5	148662215	149850203	1520	231	SLE	0.00760519	2.83021e-07
903	5	153734495	154599750	1311	181	SLE	0.00791477	1.84486e-07
908	5	158484776	159663733	1711	190	SLE	0.00905657	4.14374e-09
910	5	160519050	161478177	1530	126	SLE	0.00516605	2.71441e-06
912	5	162386028	163781268	2168	205	SLE	0.00607186	3.34951e-05
914	5	165289212	166863413	1743	248	SLE	0.00871079	8.12273e-08
916	5	168342744	169506966	1959	231	SLE	0.00615916	2.78922e-05
918	5	170898341	172285682	1894	269	SLE	0.00922682	7.20914e-08
920	5	173606996	174662885	1717	241	SLE	0.0112601	7.18864e-11
923	5	177659903	178595252	172	102	SLE	0.00505285	6.69307e-06
926	6	63979	1380679	1844	258	SLE	0.0120237	1.8296e-11
927	6	1380680	2746531	1933	232	SLE	0.00636935	1.06561e-05
928	6	2746532	3964072	1877	243	SLE	0.00743512	3.6226e-06
929	6	3964073	4657086	1221	122	SLE	0.00490718	2.39118e-05
930	6	4657087	5378213	1214	144	SLE	0.00491349	4.51937e-05
932	6	6621938	7808323	2019	262	SLE	0.0117434	1.93213e-11
937	6	13352327	15069421	1871	243	SLE	0.00851654	4.02236e-08
939	6	16566883	17391994	1212	181	SLE	0.00726684	4.95963e-07
945	6	21295865	22199713	1112	179	SLE	0.0073919	3.73155e-07
948	6	23939307	24950379	1909	204	SLE	0.00655744	9.22943e-07
949	6	24950380	25684629	1684	158	SLE	0.013919	1.40334e-21
950	6	25684630	26396200	1383	91	SLE	0.00903028	9.77282e-17
952	6	27261036	28666364	2015	83	SLE	0.01376	3.98649e-30
953	6	28666365	29529755	199	47	SLE	0.0132242	1.55556e-34
954	6	29529756	29833843	242	31	SLE	0.0165062	1.36519e-46
956	6	30070718	30715006	31	17	SLE	0.0037706	1.11946e-08
958	6	31106494	31250556	183	34	SLE	0.02846	1.26916e-83
960	6	31320269	31427209	243	36	SLE	0.0473458	2.7085e-196
961	6	31427210	32208901	589	105	SLE	0.0781226	9.78646e-268
962	6	32208902	32454577	44	18	SLE	0.037853	7.88443e-157
964	6	32539568	32586784	40	10	SLE	0.0154703	9.5808e-45
965	6	32586785	32629239	29	13	SLE	0.0466163	7.35594e-157
966	6	32629240	32682213	32	8	SLE	0.0109496	4.81627e-32
967	6	32682214	32897998	319	54	SLE	0.0391893	2.40768e-132
969	6	33194976	33864262	1104	143	SLE	0.00961479	4.23048e-13
970	6	33864263	34979270	1570	143	SLE	0.00885	2.12113e-11
971	6	34979271	36346353	1733	176	SLE	0.00722879	1.07869e-07
974	6	38688721	39785907	2006	202	SLE	0.00591362	4.58321e-05
976	6	40778402	42103738	1906	246	SLE	0.00820112	2.71227e-07
1007	6	74401507	75461313	1922	101	SLE	0.00414914	7.44701e-05
1012	6	79859904	80693927	1336	154	SLE	0.00807863	1.2705e-08
1022	6	89974268	91097024	1302	173	SLE	0.00741819	8.70248e-08
1026	6	93696826	95176337	2355	198	SLE	0.00644685	1.20215e-05
1037	6	106053916	107309327	2157	233	SLE	0.0166611	1.73812e-21
1038	6	107309328	109043244	1897	181	SLE	0.00688297	1.44459e-06
1045	6	116132148	117674076	2313	170	SLE	0.00628099	9.16532e-07
1053	6	123854858	125365054	1938	235	SLE	0.00642548	2.75657e-05
1054	6	125365055	127545459	1946	192	SLE	0.00575073	2.70817e-05
1057	6	129850179	130550137	1281	188	SLE	0.00839795	2.5291e-08
1062	6	135544084	137553212	1720	188	SLE	0.00527869	8.64948e-05
1063	6	137553213	138825721	2124	203	SLE	0.0150786	2.44047e-22
1065	6	139716714	141449453	2038	182	SLE	0.00580658	1.72037e-05
1071	6	148184845	149278798	2027	248	SLE	0.0100869	3.87664e-09
1078	6	154462011	155523957	1681	239	SLE	0.00792428	2.43067e-06
1095	7	617320	1366972	1173	128	SLE	0.00480632	5.68956e-05
1104	7	7926501	8718351	1440	186	SLE	0.0060721	1.03739e-05
1105	7	8718352	9225106	1125	173	SLE	0.0070251	5.51464e-07
1116	7	16739014	17596578	1368	238	SLE	0.00841113	6.94924e-08
1121	7	22165061	23106680	1643	173	SLE	0.00542077	6.85151e-05
1127	7	28890887	30175113	2175	241	SLE	0.0091349	6.38395e-09
1132	7	34114533	35354135	2052	146	SLE	0.00557451	1.13994e-05
1140	7	43448816	44989571	1801	174	SLE	0.00588063	3.97294e-05
1143	7	47253455	48363585	1704	220	SLE	0.00950205	5.29627e-09
1146	7	49632427	50894508	2114	170	SLE	0.00668609	1.82066e-06
1166	7	73128831	75243899	781	106	SLE	0.00809304	2.05193e-11
1169	7	77663965	78685009	2056	218	SLE	0.00646638	1.2797e-05
1173	7	82759284	83953009	1912	163	SLE	0.00679937	6.98872e-07
1179	7	90660832	92530165	1567	155	SLE	0.00738102	8.59414e-08
1196	7	111795300	113339386	1954	159	SLE	0.00476152	9.13329e-05
1207	7	127903739	128779173	1477	120	SLE	0.0270254	8.56566e-57
1208	7	128779174	130418704	2146	211	SLE	0.00781387	2.99547e-07
1209	7	130418705	131856481	1917	246	SLE	0.00787644	5.44689e-07
1214	7	137657460	138755107	1505	222	SLE	0.00842029	2.92152e-08
1216	7	140217631	142098979	1751	172	SLE	0.0051736	6.3855e-05
1225	7	152253295	153241228	1799	207	SLE	0.00619992	2.27439e-05
1227	7	154407488	155280610	1639	227	SLE	0.00928514	7.28756e-09
1230	7	157199332	158031247	135	89	SLE	0.0049909	2.5102e-06
1235	8	1628040	2070902	796	207	SLE	0.00869618	1.92698e-08
1240	8	3787249	4273083	1504	236	SLE	0.00621329	7.02576e-05
1242	8	4893121	5566269	2010	221	SLE	0.00907452	2.36589e-08
1244	8	6019164	6663427	1637	217	SLE	0.0114749	2.2188e-12
1250	8	10478852	11466761	1691	195	SLE	0.0113074	1.72373e-12
1304	8	68683824	70004665	2076	225	SLE	0.00810439	5.43928e-08
1320	8	87563146	89081177	2155	188	SLE	0.00654246	4.50003e-06
1324	8	92876621	94999066	2053	235	SLE	0.00585552	6.18395e-05
1331	8	102548681	103716053	1901	198	SLE	0.00575401	8.2381e-05
1349	8	122622805	124001019	1503	182	SLE	0.00871453	1.03749e-08
1353	8	128073655	129291118	1954	272	SLE	0.0154961	8.71187e-17
1358	8	133461552	134509448	1697	218	SLE	0.0108725	9.12511e-11
1381	9	8262304	9170120	1885	220	SLE	0.00620586	4.16779e-05
1424	9	78630916	79451035	1373	216	SLE	0.00748857	9.85914e-07
1453	9	109150718	110630150	2072	259	SLE	0.00886111	5.75819e-09
1457	9	112865521	113646149	1331	194	SLE	0.00602305	2.65386e-05
1464	9	119001228	119890464	1303	181	SLE	0.00536902	6.678e-05
1472	9	128785783	129617771	1166	209	SLE	0.00709098	1.96341e-06
1476	9	132999453	134141936	1323	211	SLE	0.00619401	2.75028e-05
1478	9	135135888	136042490	1216	186	SLE	0.00513849	8.0421e-05
1485	10	60515	1329232	1474	165	SLE	0.0060592	4.15963e-06
1490	10	3880323	4813182	1521	203	SLE	0.00698729	3.04093e-06
1492	10	5396243	6234718	1564	225	SLE	0.00585302	3.61033e-05
1496	10	8771921	10081279	2149	171	SLE	0.00564862	2.07697e-05
1500	10	12581572	13208061	1088	185	SLE	0.00562758	5.74725e-05
1502	10	14008136	14820755	1645	209	SLE	0.0091468	3.4455e-21
1518	10	29393750	30000223	1275	157	SLE	0.00542969	6.0613e-05
1522	10	33655459	35178224	2078	232	SLE	0.00622187	8.35094e-05
1545	10	64069688	65400431	1999	150	SLE	0.00512846	6.17515e-05
1553	10	71672998	72659223	1953	236	SLE	0.00870356	2.12896e-08
1554	10	72659224	73514214	1537	239	SLE	0.00907338	6.84909e-09
1559	10	79952997	81190573	1915	277	SLE	0.00826634	2.62803e-07
1577	10	99367801	100337830	1204	162	SLE	0.00723588	1.57874e-07
1589	10	114255955	115588903	1628	225	SLE	0.0095993	5.62104e-09
1592	10	118416050	119528730	1254	182	SLE	0.0056912	3.53901e-05
1603	10	129831970	130694008	1494	237	SLE	0.0106348	5.34386e-10
1610	11	87150	1061399	1172	147	SLE	0.00870189	1.00573e-09
1620	11	7915072	9080939	1908	208	SLE	0.00715675	3.00393e-06
1624	11	11632651	12470449	1511	229	SLE	0.0101459	2.10782e-10
1639	11	26356981	27018307	1364	114	SLE	0.0054518	3.5617e-06
1647	11	34672698	35500367	1622	128	SLE	0.00906343	1.11186e-11
1701	11	94384536	95327210	1186	160	SLE	0.00610339	5.51316e-06
1721	11	114742318	116247377	1872	239	SLE	0.00704036	3.86313e-06
1722	11	116247378	117295641	1872	188	SLE	0.0054974	7.31069e-05
1723	11	117295642	118901213	2333	262	SLE	0.00630461	4.93091e-05
1726	11	121208187	122589224	1719	204	SLE	0.00552619	4.52813e-05
1728	11	123398883	124403477	1951	146	SLE	0.00578784	7.02826e-06
1732	11	127306872	128262550	1530	146	SLE	0.00715519	8.70923e-08
1733	11	128262551	129451784	1005	197	SLE	0.0116627	4.54935e-14
1740	12	60317	1078397	1184	178	SLE	0.00524789	4.91611e-05
1744	12	3871115	4967643	1383	231	SLE	0.00707149	2.88744e-06
1746	12	6023701	6948954	1188	152	SLE	0.00493809	3.80709e-05
1752	12	11742150	12721874	1079	169	SLE	0.00792087	1.32946e-08
1753	12	12721875	13559527	976	177	SLE	0.00748636	1.09828e-07
1755	12	14656850	16136742	1412	151	SLE	0.00504335	6.23991e-05
1779	12	40017397	41198229	2246	155	SLE	0.003725	4.30184e-05
1798	12	63055937	63764111	1217	163	SLE	0.00652666	5.4053e-07
1800	12	64403858	66114643	1501	175	SLE	0.0049169	7.3965e-05
1810	12	75563969	76524573	1242	160	SLE	0.00582736	1.39393e-05
1812	12	77800464	79315178	2190	210	SLE	0.00580145	2.54395e-05
1825	12	94385885	95147845	1276	207	SLE	0.00552584	4.70029e-05
1831	12	100931424	101825061	1188	173	SLE	0.00770996	3.47668e-08
1837	12	106964978	108183188	1627	169	SLE	0.00531317	2.13581e-05
1839	12	109031820	110111514	1524	146	SLE	0.00602405	3.01602e-06
1844	12	115439452	116197675	1206	199	SLE	0.00541654	9.93495e-05
1848	12	119301062	120567740	1701	196	SLE	0.00803896	4.80009e-08
1852	12	124843769	126079935	1911	268	SLE	0.0080488	2.20133e-06
1866	13	21540734	22795188	1684	230	SLE	0.00649191	2.36161e-05
1867	13	22795189	23729049	1959	239	SLE	0.00616369	5.75934e-05
1869	13	24818334	25977140	1959	182	SLE	0.00673643	4.13295e-06
1872	13	27392006	28587125	2095	225	SLE	0.00905428	1.98331e-08
1875	13	31433219	32986686	2186	229	SLE	0.00895527	4.05581e-08
1887	13	43931932	45476446	1915	189	SLE	0.00611183	5.59093e-06
1911	13	71010209	71976862	1761	189	SLE	0.00560998	5.34711e-05
1942	13	104378436	105672500	1992	201	SLE	0.00604284	2.82199e-05
1945	13	107037865	108521978	2069	276	SLE	0.0167289	6.40821e-18
1948	13	109813577	110995432	2102	248	SLE	0.00904641	1.65166e-08
1955	14	20876081	21982654	1455	266	SLE	0.0147011	3.45618e-16
1957	14	22760701	23985936	1512	237	SLE	0.010445	1.56699e-10
1958	14	23985937	24906056	1021	154	SLE	0.00715907	1.29013e-07
1963	14	29029225	30831154	1858	222	SLE	0.0104253	8.92928e-11
1965	14	32382246	33591113	1629	232	SLE	0.00662574	6.7146e-06
1984	14	52206123	52760553	1173	128	SLE	0.00439405	8.52464e-05
1986	14	54359599	55292832	1122	142	SLE	0.00522222	3.80994e-05
1988	14	56206431	57460781	1925	217	SLE	0.00787303	6.2301e-07
1999	14	68976913	69794542	1352	197	SLE	0.00641722	4.21126e-06
2002	14	72665320	73373373	1182	171	SLE	0.00640444	2.34696e-06
2009	14	79199452	81001920	2193	222	SLE	0.00700067	1.05408e-06
2017	14	89482884	90662836	1542	202	SLE	0.00617993	2.13203e-05
2019	14	92101229	93386328	2071	236	SLE	0.00692364	1.23412e-05
2021	14	94892241	95946792	2068	285	SLE	0.0108166	3.57115e-09
2022	14	95946793	97174314	2064	242	SLE	0.00881299	7.56451e-09
2023	14	97174315	98268391	1577	191	SLE	0.00720868	3.85201e-07
2026	14	99474534	100786189	1676	211	SLE	0.00728297	5.98564e-07
2047	15	36583328	37962915	1979	237	SLE	0.00624287	2.95219e-05
2066	15	61130596	62106138	1480	252	SLE	0.00768975	4.77263e-06
2068	15	63218979	64339945	1847	179	SLE	0.00563031	3.72225e-05
2072	15	69089816	70767983	2033	250	SLE	0.0107629	3.54899e-10
2076	15	74458114	76401952	1855	163	SLE	0.00584483	3.75355e-06
2089	15	89385188	90632718	1509	181	SLE	0.00570667	5.76692e-05
2093	15	93707011	94565521	1553	240	SLE	0.00713169	6.61014e-06
2103	16	1049080	1996492	1565	155	SLE	0.00692314	4.18549e-07
2105	16	3379997	4816145	1666	201	SLE	0.00633351	1.92412e-05
2107	16	5782969	6446081	1158	230	SLE	0.00793057	9.28874e-07
2108	16	6446082	7051429	1605	212	SLE	0.00570785	7.64688e-05
2109	16	7051430	7704354	1671	215	SLE	0.00868455	2.53249e-09
2111	16	8341013	9104469	1610	194	SLE	0.0060685	1.57319e-05
2117	16	12793150	13893407	2248	214	SLE	0.00644679	5.25815e-05
2123	16	22667049	24014705	1868	177	SLE	0.007745	4.95232e-08
2124	16	24014706	25235251	1511	224	SLE	0.00994733	4.31935e-10
2128	16	29043178	31384210	1119	116	SLE	0.0281313	8.73732e-62
2133	16	50467034	52041336	193	125	SLE	0.00645736	3.41551e-07
2158	16	78280637	78973580	1876	251	SLE	0.0108751	1.48652e-11
2159	16	78973581	79662634	1288	254	SLE	0.00640745	4.36665e-05
2160	16	79662635	80559685	1881	214	SLE	0.00665507	5.58433e-06
2163	16	82310205	83077869	1799	262	SLE	0.00654059	2.71522e-05
2165	16	83778372	84440154	1679	269	SLE	0.0120649	3.78297e-12
2166	16	84440155	85146805	1647	256	SLE	0.00696898	7.16693e-07
2167	16	85146806	86058597	1018	230	SLE	0.0209644	3.79016e-28
2181	17	7264459	8554763	1590	186	SLE	0.00771847	9.35105e-08
2188	17	14508611	15308722	1715	209	SLE	0.0110674	1.12751e-11
2198	17	31318754	32356061	1719	236	SLE	0.00744274	2.36541e-06
2210	17	47516225	48722590	1210	240	SLE	0.0166258	5.5053e-23
2216	17	54950108	56245227	1455	253	SLE	0.00805586	4.65251e-07
2222	17	64438388	65582327	1685	235	SLE	0.00621127	2.03315e-05
2226	17	69245591	70495119	1585	238	SLE	0.00772157	1.94332e-06
2227	17	70495120	71466953	1287	245	SLE	0.00870902	1.03983e-07
2229	17	72383473	73741321	1806	197	SLE	0.00748901	5.34424e-07
2234	17	77412787	78438332	450	138	SLE	0.00579018	2.6926e-06
2238	18	10719	848350	1257	180	SLE	0.00512101	9.92287e-05
2240	18	1940212	2839842	1634	179	SLE	0.00689706	7.32161e-07
2243	18	4603962	5575812	1495	180	SLE	0.00753572	2.42066e-07
2245	18	6756497	7862479	1438	208	SLE	0.00708843	5.46514e-07
2246	18	7862480	8788524	1569	198	SLE	0.00842151	3.62816e-08
2247	18	8788525	9816164	1939	241	SLE	0.00677925	1.04992e-05
2255	18	20009697	21622716	1900	152	SLE	0.00548936	3.74934e-05
2263	18	30401129	32458907	2372	177	SLE	0.00687694	1.83986e-06
2265	18	34153298	36056932	2409	243	SLE	0.00661637	1.59208e-05
2276	18	47455926	48228379	1234	165	SLE	0.0055197	3.98695e-05
2287	18	58527237	59449422	1174	165	SLE	0.00542512	4.94103e-05
2297	18	69311743	70540349	2164	206	SLE	0.00539315	8.55073e-05
2300	18	72785207	73568260	1397	172	SLE	0.00686113	3.91847e-07
2307	19	762047	1515920	602	128	SLE	0.00627618	1.05225e-06
2308	19	1515921	2253174	603	115	SLE	0.00543668	4.98062e-06
2313	19	5478685	6455428	1473	147	SLE	0.00462864	9.76609e-05
2318	19	10028841	11681978	2015	224	SLE	0.00909303	6.44857e-09
2340	19	33785836	34633274	1505	189	SLE	0.00649226	6.90822e-06
2353	19	46765061	47752727	1103	161	SLE	0.0085127	7.52532e-09
2357	19	50451926	51259178	849	148	SLE	0.00776237	2.23229e-10
2365	19	55714086	56411086	148	104	SLE	0.00492472	2.09674e-05
2369	20	60795	884241	1256	234	SLE	0.0064438	1.5795e-05
2370	20	884242	1771285	1402	210	SLE	0.00764318	4.06835e-07
2372	20	2668109	3736551	1442	177	SLE	0.00524219	5.17879e-05
2376	20	6128359	7231796	1457	174	SLE	0.00831469	8.79202e-09
2377	20	7231797	7959828	1241	78	SLE	0.00482285	1.11135e-06
2380	20	10279604	11257012	1540	187	SLE	0.00704005	2.03539e-06
2391	20	19957929	21682377	1739	198	SLE	0.00622752	1.26333e-05
2403	20	38427595	40272390	2191	214	SLE	0.0069007	2.24874e-06
2404	20	40272391	41351514	1815	226	SLE	0.00696673	3.96558e-06
2410	20	46486133	47203836	1018	166	SLE	0.00720336	1.63512e-07
2412	20	48212976	49236418	1480	174	SLE	0.010174	1.88485e-11
2413	20	49236419	50653620	2136	254	SLE	0.00684332	4.73041e-06
2422	20	56951774	57924037	293	102	SLE	0.0044442	3.83542e-05
2438	21	22201891	23266941	1990	160	SLE	0.00612925	8.61682e-06
2449	21	34383795	35729261	1687	235	SLE	0.00865191	6.74901e-08
2453	21	39252060	40480831	1675	232	SLE	0.00617206	5.31337e-05
2457	21	43081435	43812791	230	143	SLE	0.00631206	1.42698e-06
2458	21	43812792	44815008	144	92	SLE	0.00513323	1.90202e-06
2465	22	19635655	20969184	1295	165	SLE	0.00690468	7.19652e-07
2466	22	20969185	22404422	1241	121	SLE	0.00847896	7.10278e-11
2469	22	23950733	25282436	1485	136	SLE	0.00586256	1.83715e-15
2471	22	26166935	27192923	1677	238	SLE	0.008174	4.50441e-10
2482	22	37364005	38718589	1759	225	SLE	0.00702296	3.99516e-06
2483	22	38718590	40378783	1809	194	SLE	0.00675089	2.79503e-06
2488	22	44409534	45170649	1321	240	SLE	0.011127	6.66971e-11
2492	22	48269178	48977538	159	115	SLE	0.00528113	9.48606e-06
4	1	2983520	3582047	812	155	SLE	0.00634771	7.82813e-07
9	1	6136815	7711794	2116	232	SLE	0.0064036	1.03413e-05
14	1	11709174	13481025	1348	160	SLE	0.00826664	2.55322e-09
21	1	19238925	20556202	2156	202	SLE	0.00702031	1.56438e-06
24	1	22145630	22740287	1138	148	SLE	0.00490015	6.15254e-05
26	1	23907046	25885138	2026	216	SLE	0.0139985	3.50051e-16
36	1	38474037	40200950	2216	223	SLE	0.00619696	3.99521e-05
38	1	41093876	41977966	1437	167	SLE	0.00801157	1.07961e-08
48	1	55727135	56799636	1814	164	SLE	0.005562	1.7376e-05
52	1	59889046	61377615	1872	202	SLE	0.00711634	2.14535e-07
58	1	67761891	68633860	1138	152	SLE	0.00527701	2.26523e-05
60	1	69438910	70992905	1975	197	SLE	0.00532783	5.95728e-05
73	1	84728348	86017267	2183	213	SLE	0.00758809	2.95992e-07
79	1	90941550	91870059	1321	143	SLE	0.00505503	4.00877e-05
80	1	91870060	92904465	1366	137	SLE	0.00473362	7.90663e-05
95	1	107874654	109271449	1915	180	SLE	0.00860813	6.20313e-09
98	1	111134063	112489248	2339	244	SLE	0.00694631	5.15513e-06
100	1	113418038	114664387	1303	141	SLE	0.00551092	4.00277e-06
101	1	114664388	116207297	2423	213	SLE	0.00935644	2.14916e-09
110	1	151146408	152535630	1294	123	SLE	0.00468836	8.85657e-05
114	1	156813846	158081627	1891	195	SLE	0.010477	3.43328e-11
117	1	159882516	161054076	1488	192	SLE	0.00601622	1.53496e-05
118	1	161054077	161945442	1249	116	SLE	0.00648522	1.82018e-07
133	1	176449097	177746472	1571	141	SLE	0.00743082	5.13927e-08
138	1	182420541	183920616	2226	156	SLE	0.0144516	1.93256e-22
152	1	197935822	199263389	2084	166	SLE	0.0103703	6.20013e-12
156	1	202583885	204092537	1909	227	SLE	0.0120509	2.76864e-13
159	1	205917549	208162951	1773	194	SLE	0.00946317	5.70574e-10
160	1	208162952	209711169	2024	269	SLE	0.00570951	8.28522e-05
162	1	211082893	212347582	2483	187	SLE	0.00582924	9.99617e-06
164	1	213958293	214783872	1217	159	SLE	0.00532975	4.63732e-05
179	1	230227248	231287764	2192	247	SLE	0.00727346	1.19284e-06
186	1	236199672	237409458	1987	200	SLE	0.00668854	2.93901e-06
190	1	239332149	240248508	1410	164	SLE	0.00548677	2.50996e-05
205	2	2680064	3314202	990	170	SLE	0.00683666	1.34098e-06
207	2	4016105	4766969	1236	127	SLE	0.0065772	2.8937e-07
212	2	7966710	8978798	1088	163	SLE	0.0074215	1.84772e-07
221	2	15721704	17241115	2137	250	SLE	0.00915074	7.77621e-08
231	2	28819511	29627932	1293	173	SLE	0.0063598	1.00309e-05
232	2	29627933	30575619	1423	174	SLE	0.00892192	8.75448e-10
247	2	42307419	43295776	1362	176	SLE	0.00621884	1.8544e-05
271	2	64696090	65938002	1710	199	SLE	0.00894542	3.18914e-09
290	2	84395900	85992794	2191	192	SLE	0.00644331	7.13864e-07
301	2	105120579	106546524	2241	236	SLE	0.00874496	1.06407e-07
311	2	118663654	119635489	1501	160	SLE	0.00878701	1.80709e-09
313	2	121073753	122026817	1255	179	SLE	0.00660733	4.38763e-06
326	2	134359060	135160197	1278	167	SLE	0.00574289	9.27268e-06
335	2	144503689	145977920	1155	161	SLE	0.0057519	8.16878e-06
339	2	151428989	152497375	1665	144	SLE	0.00540347	2.57369e-05
345	2	159040980	160200379	2182	169	SLE	0.00538687	8.73738e-05
355	2	170865766	171566482	1187	174	SLE	0.00706003	4.29489e-07
359	2	174118390	174927563	1132	169	SLE	0.00769057	9.62762e-08
373	2	189882703	191051954	1635	82	SLE	0.00428211	1.98336e-05
374	2	191051955	193033982	2252	207	SLE	0.0419794	4.40187e-84
383	2	205038120	206821199	1866	266	SLE	0.00669304	1.98884e-05
393	2	215899571	217566011	2108	252	SLE	0.00984949	6.76116e-09
407	2	230541093	231847386	2026	216	SLE	0.00586691	1.96142e-05
408	2	231847387	233352722	2054	185	SLE	0.00649943	6.66311e-06
412	2	235625790	236276287	1199	173	SLE	0.00512118	7.81085e-05
414	2	237194298	238185482	1341	145	SLE	0.00504732	3.68513e-05
424	3	2140012	3128152	1704	269	SLE	0.00791037	2.14553e-06
425	3	3128153	4109393	1908	234	SLE	0.00840177	3.07405e-08
426	3	4109394	4835083	1192	179	SLE	0.00725367	1.64962e-07
428	3	5496183	6421145	2012	221	SLE	0.0092119	6.03361e-09
440	3	19030989	20754842	2605	200	SLE	0.00639574	1.13147e-05
449	3	28649811	29877022	2349	244	SLE	0.00859233	7.92522e-08
457	3	36840137	38729767	2193	231	SLE	0.00626912	4.89098e-05
463	3	45844192	47588461	2297	159	SLE	0.0063251	1.61841e-06
464	3	47588462	50387742	1514	114	SLE	0.00534876	3.03378e-06
470	3	56954879	58557718	2332	158	SLE	0.00746178	6.68332e-08
472	3	59998584	60571139	1236	191	SLE	0.00656894	3.63372e-06
474	3	61277588	62609818	1664	256	SLE	0.00624149	4.24669e-05
475	3	62609819	63670803	1950	178	SLE	0.00847141	1.77906e-08
481	3	68319771	69784969	2337	225	SLE	0.00669732	1.71178e-05
483	3	71223282	72334704	1428	258	SLE	0.00674748	5.3598e-06
484	3	72334705	73606612	1501	227	SLE	0.00631261	1.78096e-05
507	3	100552523	101906989	1945	135	SLE	0.00477751	5.83115e-05
519	3	113657666	115649909	2064	239	SLE	0.0100675	2.33612e-10
539	3	133718494	135288394	2105	231	SLE	0.00856799	8.59694e-08
551	3	148638309	149998411	2214	224	SLE	0.00992291	6.32527e-10
558	3	156795411	157633700	1326	111	SLE	0.00447823	5.1262e-05
569	3	167118894	168972662	2158	176	SLE	0.00719462	4.76053e-07
571	3	170174579	171134849	1208	167	SLE	0.00732247	2.24362e-07
573	3	172004761	173415591	1743	188	SLE	0.00711789	1.92588e-06
577	3	176931164	178110322	1494	198	SLE	0.00597084	1.08961e-05
583	3	185709997	186602045	1057	195	SLE	0.00852438	6.46031e-09
584	3	186602046	187939199	1971	274	SLE	0.00891767	3.12331e-07
601	4	4266179	5051834	1381	204	SLE	0.00501848	4.90702e-05
603	4	5972710	7135819	1749	274	SLE	0.009177	3.26992e-08
653	4	57103101	58011085	1593	166	SLE	0.00510638	6.94774e-05
689	4	99532481	100333334	1518	107	SLE	0.00610908	2.08576e-07
692	4	102544804	104384534	2243	175	SLE	0.00808577	5.29872e-08
727	4	139553761	141087047	1703	225	SLE	0.00696568	2.46735e-06
739	4	156520289	157597309	2358	189	SLE	0.00559285	5.4387e-05
765	4	182065647	182946258	1790	240	SLE	0.00699316	4.00976e-06
766	4	182946259	183603892	1105	196	SLE	0.00606862	1.70773e-05
768	4	184338585	185483262	1922	274	SLE	0.0170175	6.86347e-19
777	5	1206610	2106885	1602	221	SLE	0.00739877	1.53397e-06
781	5	4636543	5828694	2097	239	SLE	0.0084289	6.44858e-08
785	5	9203856	10549029	1889	250	SLE	0.009548	3.17506e-09
801	5	28315654	29593755	2198	137	SLE	0.00494492	3.22673e-05
803	5	30416067	31679464	1889	223	SLE	0.00685162	4.58523e-06
804	5	31679465	32727914	1539	211	SLE	0.0107004	4.46199e-11
806	5	33971057	35157146	1678	159	SLE	0.00536974	6.46798e-05
807	5	35157147	36431967	2036	162	SLE	0.00525708	4.65768e-05
809	5	37925488	39438985	1977	197	SLE	0.00526266	8.98675e-05
822	5	55221399	55968966	1260	201	SLE	0.0061688	2.43484e-05
832	5	65606871	67096191	2081	189	SLE	0.00709734	9.85496e-07
841	5	79005159	80448225	2241	247	SLE	0.00691808	2.21462e-05
864	5	106389389	107265911	1340	181	SLE	0.00600645	1.47934e-05
881	5	124109486	125131720	1633	213	SLE	0.00846777	3.23185e-08
889	5	134556571	135344943	1230	141	SLE	0.00522811	4.95392e-05
890	5	135344944	136949853	2129	210	SLE	0.00958348	1.50872e-09
893	5	141253831	142532956	1755	217	SLE	0.00683615	1.11936e-05
894	5	142532957	143605908	1460	165	SLE	0.0057186	2.35686e-05
897	5	147180172	148662214	2049	170	SLE	0.00497635	7.76429e-05
903	5	153734495	154599750	1312	181	SLE	0.00789005	1.9707e-07
908	5	158484776	159663733	1711	190	SLE	0.00905657	4.14374e-09
909	5	159663734	160519049	1437	179	SLE	0.0120914	3.32338e-15
912	5	162386028	163781268	2168	205	SLE	0.00601912	3.911e-05
914	5	165289212	166863413	1744	249	SLE	0.00845224	1.73238e-07
916	5	168342744	169506966	1975	231	SLE	0.00610971	3.03205e-05
918	5	170898341	172285682	1896	269	SLE	0.00936831	5.08397e-08
921	5	174662886	176180301	1524	215	SLE	0.00878911	7.17668e-08
923	5	177659903	178595252	172	102	SLE	0.00505285	6.69307e-06
926	6	63979	1380679	1844	258	SLE	0.0120237	1.8296e-11
928	6	2746532	3964072	1877	243	SLE	0.00743512	3.6226e-06
930	6	4657087	5378213	1216	144	SLE	0.004876	5.07506e-05
932	6	6621938	7808323	2020	263	SLE	0.0117962	3.28025e-11
939	6	16566883	17391994	1216	182	SLE	0.00730965	4.11589e-07
945	6	21295865	22199713	1112	179	SLE	0.0073919	3.73155e-07
948	6	23939307	24950379	1909	204	SLE	0.00655744	9.22943e-07
949	6	24950380	25684629	1684	158	SLE	0.013919	1.40334e-21
950	6	25684630	26396200	1383	91	SLE	0.00903028	9.77282e-17
951	6	26396201	27261035	1009	67	SLE	0.00935349	7.95251e-21
953	6	28666365	29529755	199	47	SLE	0.0132242	1.55556e-34
956	6	30070718	30715006	31	17	SLE	0.0037706	1.11946e-08
957	6	30715007	31106493	251	61	SLE	0.0429414	2.27863e-154
959	6	31250557	31320268	85	16	SLE	0.0240305	1.24529e-77
962	6	32208902	32454577	49	18	SLE	0.0378855	4.04723e-157
964	6	32539568	32586784	40	10	SLE	0.0154703	9.5808e-45
966	6	32629240	32682213	32	8	SLE	0.0109496	4.81627e-32
967	6	32682214	32897998	319	54	SLE	0.0391893	2.40768e-132
970	6	33864263	34979270	1570	143	SLE	0.00885	2.12113e-11
971	6	34979271	36346353	1735	176	SLE	0.00684098	4.86332e-07
974	6	38688721	39785907	2007	203	SLE	0.00617741	2.42563e-05
1007	6	74401507	75461313	1924	101	SLE	0.00415985	7.32249e-05
1022	6	89974268	91097024	1307	173	SLE	0.00737289	8.73482e-08
1026	6	93696826	95176337	2355	198	SLE	0.00644685	1.20215e-05
1037	6	106053916	107309327	2156	233	SLE	0.0165517	2.35521e-21
1038	6	107309328	109043244	1897	181	SLE	0.00688297	1.44459e-06
1053	6	123854858	125365054	1938	235	SLE	0.00642548	2.75657e-05
1062	6	135544084	137553212	1723	188	SLE	0.00532523	7.16674e-05
1063	6	137553213	138825721	2124	203	SLE	0.0150786	2.44047e-22
1073	6	150635316	151629954	2059	233	SLE	0.0102329	3.70214e-10
1078	6	154462011	155523957	1685	240	SLE	0.00816607	1.27903e-06
1079	6	155523958	156762740	2060	235	SLE	0.0056138	3.50018e-05
1087	6	163336362	164687462	2271	237	SLE	0.0117643	1.21557e-11
1095	7	617320	1366972	1226	126	SLE	0.00484139	4.50127e-05
1104	7	7926501	8718351	1457	186	SLE	0.00611963	9.22622e-06
1116	7	16739014	17596578	1368	238	SLE	0.00841113	6.94924e-08
1132	7	34114533	35354135	2054	146	SLE	0.00556044	1.28783e-05
1143	7	47253455	48363585	1706	221	SLE	0.00879638	4.82069e-08
1169	7	77663965	78685009	2056	218	SLE	0.00646638	1.2797e-05
1173	7	82759284	83953009	1912	163	SLE	0.00679937	6.98872e-07
1179	7	90660832	92530165	1567	155	SLE	0.00738102	8.59414e-08
1196	7	111795300	113339386	1955	159	SLE	0.00474235	9.33811e-05
1207	7	127903739	128779173	1477	120	SLE	0.0270254	8.56566e-57
1208	7	128779174	130418704	2149	212	SLE	0.00833123	7.44623e-08
1209	7	130418705	131856481	1917	246	SLE	0.00787644	5.44689e-07
1212	7	134943222	136113467	1926	183	SLE	0.00554204	4.28204e-05
1216	7	140217631	142098979	1751	172	SLE	0.0051736	6.3855e-05
1225	7	152253295	153241228	1799	207	SLE	0.00619992	2.27439e-05
1228	7	155280611	156344386	1131	211	SLE	0.00625159	2.90919e-05
1235	8	1628040	2070902	796	207	SLE	0.00869618	1.92698e-08
1240	8	3787249	4273083	1504	236	SLE	0.00621329	7.02576e-05
1241	8	4273084	4893120	1617	260	SLE	0.00680989	1.38683e-05
1242	8	4893121	5566269	2010	221	SLE	0.00907452	2.36589e-08
1250	8	10478852	11466761	1691	195	SLE	0.0113074	1.72373e-12
1304	8	68683824	70004665	2075	225	SLE	0.00789523	1.00276e-07
1309	8	73838028	75011699	1728	193	SLE	0.00566748	5.90304e-05
1320	8	87563146	89081177	2156	189	SLE	0.00646651	5.75444e-06
1324	8	92876621	94999066	2055	236	SLE	0.0058538	6.20593e-05
1326	8	96175631	96900513	1274	180	SLE	0.00645	6.87647e-06
1351	8	125453323	126766827	1831	219	SLE	0.00663537	1.22513e-05
1353	8	128073655	129291118	1954	272	SLE	0.0154961	8.71187e-17
1380	9	7388203	8262303	1605	239	SLE	0.0108086	1.28447e-11
1381	9	8262304	9170120	1887	221	SLE	0.00610346	5.25362e-05
1412	9	34704545	36749273	2299	246	SLE	0.00746096	4.82654e-07
1419	9	72288879	73915494	2564	193	SLE	0.00820387	5.95372e-08
1427	9	81161598	82601465	1682	250	SLE	0.00829978	6.88877e-07
1441	9	95854926	96670171	1602	125	SLE	0.0055327	2.84221e-06
1453	9	109150718	110630150	2077	260	SLE	0.00866874	1.14621e-08
1464	9	119001228	119890464	1304	181	SLE	0.0053576	6.85732e-05
1466	9	121008530	122677719	1884	192	SLE	0.00672806	8.17524e-06
1476	9	132999453	134141936	1324	211	SLE	0.00626924	2.30868e-05
1488	10	2637066	3225336	1199	160	SLE	0.00589719	1.22281e-05
1495	10	7659873	8771920	2177	247	SLE	0.00697509	3.41756e-06
1500	10	12581572	13208061	1092	186	SLE	0.00602988	1.76068e-05
1501	10	13208062	14008135	1354	245	SLE	0.00637352	1.83103e-05
[truncated: 12,686 more rows]

## Sheet: Supplementary Table 5
Supplementary Table 5. Bivariate LAVA results between six autoimmune diseases and six cardiovascular diseases
Note: results of bivariate LAVA analysis, testing for local genetic signal between six autoimmune diseases and six cardiovascular diseases in regions with a P-value < 0.0001. Tests are two-sided. Only local correlations significant after Bonferroni correction for multiple testing were deemed significant and interpreted. locus = index of given local genomic regions; chr = chromosome; start/stop = …
P-values lower than the Bonferroni-corrected threshold (P = 0.05/4426 combinations = 1.13E-05) are marked in dark yellow.
locus	chr	start	stop	n_snps	n_pcs	Trait1	Trait2	rho	rho.lower	rho.upper	r2	r2.lower	r2.upper	p
3	1	2215496	2983519	743	107	RA	AF	-0.105612	-0.53581	0.30124	0.0111539	0	0.29336	0.598766
36	1	38474037	40200950	2216	223	RA	AF	-0.195882	-0.65356	0.20929	0.0383698	0	0.42776	0.333267
60	1	69438910	70992905	1975	197	RA	AF	0.0980752	-0.31187	0.53857	0.00961874	0	0.29688	0.623688
95	1	107874654	109271449	1915	180	RA	AF	0.058099	-0.3924	0.5257	0.0033755	0	0.3055	0.783748
97	1	110224231	111134062	1068	173	RA	AF	0.114921	-0.36041	0.61019	0.0132069	0	0.39473	0.608877
101	1	114664388	116207297	2421	213	RA	AF	0.142026	-0.18587	0.49016	0.0201713	0	0.24157	0.396521
112	1	153410810	154685545	1161	128	RA	AF	0.511084	0.18475	0.91745	0.261207	0.03413	0.84171	0.00464597
113	1	154685546	156813845	1632	204	RA	AF	0.0121006	-0.19607	0.2221	0.000146424	0	0.0577	0.906679
118	1	161054077	161945442	1249	116	RA	AF	0.171597	-0.27468	0.65106	0.0294455	0	0.42739	0.427871
122	1	164726580	165553812	1398	192	RA	AF	0.148396	-0.20261	0.51858	0.0220214	0	0.26993	0.399484
156	1	202583885	204092537	1909	227	RA	AF	0.210728	-0.04006	0.47282	0.0444063	0	0.22356	0.103196
159	1	205917549	208162951	1772	194	RA	AF	0.0236756	-0.38202	0.42429	0.000560536	0	0.2265	0.900937
179	1	230227248	231287764	2188	246	RA	AF	0.364682	-0.00184	0.77278	0.132993	0	0.59719	0.0490595
232	2	29627933	30575619	1418	174	RA	AF	0.0164062	-0.38588	0.409	0.000269164	0	0.20777	0.931071
268	2	60775067	62429910	1887	190	RA	AF	0.0759675	-0.25353	0.41777	0.00577106	0	0.17939	0.64545
271	2	64696090	65938002	1707	198	RA	AF	0.165155	-0.14664	0.48831	0.027276	0	0.23844	0.29337
275	2	68877775	70756283	2385	218	RA	AF	-0.0566108	-0.33779	0.22083	0.00320478	0	0.11748	0.684441
286	2	79900056	80737811	1117	200	RA	AF	-0.197822	-0.6998	0.25101	0.0391336	0	0.49189	0.361225
304	2	108417774	110097868	2100	172	RA	AF	-0.00275894	-0.39631	0.40059	7.61177e-06	0	0.21428	0.988503
360	2	174927564	176734750	2283	205	RA	AF	-0.164128	-0.49215	0.15921	0.0269379	0	0.24221	0.29493
378	2	198140351	199654969	1216	100	RA	AF	-0.381158	-0.90842	0.04748	0.145281	0	0.82523	0.0822688
431	3	8664893	9970731	1617	262	RA	AF	0.0555446	-0.34874	0.46257	0.0030852	0	0.24383	0.77165
434	3	11997659	12859209	1403	117	RA	AF	-0.188726	-0.49903	0.11108	0.0356175	0	0.24903	0.213668
474	3	61277588	62609818	1663	256	RA	AF	-0.598884	-1	-0.23927	0.358663	0.05725	1	0.00231019
478	3	65326752	66702084	1749	230	RA	AF	-0.102006	-0.47884	0.25101	0.0104052	0	0.23119	0.566833
483	3	71223282	72334704	1428	258	RA	AF	0.278574	-0.13414	0.74195	0.0776034	0	0.55128	0.17125
512	3	106174686	107736519	2064	210	RA	AF	0.259174	-0.09156	0.62484	0.067171	0	0.39042	0.136569
539	3	133718494	135288394	2100	231	RA	AF	0.20753	-0.17011	0.634	0.0430686	0	0.40196	0.279806
584	3	186602046	187939199	1968	273	RA	AF	0.330472	0.06001	0.62576	0.109212	0.00425	0.39157	0.0205176
637	4	36671802	37880860	2474	217	RA	AF	-0.150002	-0.63691	0.28815	0.0225007	0	0.41234	0.482895
638	4	37880861	38984838	1982	244	RA	AF	0.0364057	-0.42326	0.49758	0.00132538	0	0.28806	0.863155
785	5	9203856	10549029	1887	249	RA	AF	0.128616	-0.18489	0.45518	0.016542	0	0.20861	0.416007
786	5	10549030	11850850	1926	219	RA	AF	-0.0362824	-0.44473	0.35901	0.00131641	0	0.22248	0.850282
791	5	16592320	17803477	1528	204	RA	AF	0.158555	-0.20863	0.53495	0.0251395	0	0.28645	0.375766
822	5	55221399	55968966	1259	201	RA	AF	-0.168731	-0.45201	0.10543	0.0284703	0	0.20431	0.210173
839	5	75959516	77290255	2017	234	RA	AF	-0.152619	-0.65121	0.30035	0.0232926	0	0.43044	0.482802
868	5	110819518	111983115	1919	176	RA	AF	-0.054345	-0.53859	0.41627	0.00295338	0	0.32862	0.805198
892	5	139408117	141253830	1954	212	RA	AF	-0.052261	-0.45592	0.3379	0.00273121	0	0.22459	0.782277
907	5	157191082	158484775	1875	203	RA	AF	0.0849319	-0.26875	0.44262	0.00721343	0	0.20438	0.622997
909	5	159663734	160519049	1437	179	RA	AF	0.263805	-0.11607	0.69855	0.0695929	0	0.48798	0.166784
918	5	170898341	172285682	1894	269	RA	AF	-0.115708	-0.50542	0.24623	0.0133882	0	0.25896	0.519014
919	5	172285683	173606995	1989	240	RA	AF	-0.163479	-0.44642	0.10009	0.0267253	0	0.19929	0.213986
931	6	5378214	6621937	1948	266	RA	AF	-0.20849	-0.54763	0.10688	0.0434682	0	0.2999	0.191105
961	6	31427210	32208901	589	104	RA	AF	0.188701	-0.0235	0.4038	0.0356081	0	0.16306	0.0724736
972	6	36346354	37570051	1955	225	RA	AF	0.00818243	-0.27328	0.29319	6.69522e-05	0	0.10497	0.953401
978	6	43770627	44596897	1127	220	RA	AF	-0.201079	-0.55427	0.12674	0.0404327	0	0.30721	0.226293
1026	6	93696826	95176337	2355	198	RA	AF	0.268747	-0.15901	0.75786	0.0722248	0	0.57435	0.204767
1053	6	123854858	125365054	1938	235	RA	AF	-0.054831	-0.49322	0.35566	0.00300644	0	0.259	0.782964
1073	6	150635316	151629954	2058	232	RA	AF	-0.101868	-0.50802	0.27591	0.0103772	0	0.25991	0.585438
1113	7	13676748	15013694	1970	240	RA	AF	0.0554461	-0.27695	0.38113	0.00307427	0	0.15619	0.727369
1125	7	25671576	27351286	2412	223	RA	AF	-0.152516	-0.53922	0.21339	0.0232612	0	0.29198	0.394569
1126	7	27351287	28890886	2131	252	RA	AF	0.251138	-0.00376	0.51098	0.0630701	0	0.2611	0.0501511
1127	7	28890887	30175113	2175	241	RA	AF	0.186352	-0.23241	0.6488	0.0347273	0	0.42094	0.356887
1208	7	128779174	130418704	2146	211	RA	AF	0.00491772	-0.3747	0.38383	2.4184e-05	0	0.19563	0.978384
1215	7	138755108	140217630	1882	211	RA	AF	0.424311	0.0761	0.84112	0.18004	0.00677	0.70748	0.0201044
1250	8	10478852	11466761	1691	195	RA	AF	0.0597689	-0.31152	0.4306	0.00357232	0	0.19901	0.739398
1351	8	125453323	126766827	1831	219	RA	AF	-0.397426	-0.90711	0.00165	0.157947	0	0.82284	0.0578701
1353	8	128073655	129291118	1954	272	RA	AF	-0.391635	-0.68939	-0.12612	0.153378	0.01594	0.47526	0.00493636
1358	8	133461552	134509448	1697	218	RA	AF	0.170767	-0.20357	0.57461	0.0291613	0	0.33163	0.34625
1381	9	8262304	9170120	1885	220	RA	AF	-0.184223	-0.54274	0.15264	0.0339382	0	0.29456	0.274601
1388	9	13512853	14244747	1275	196	RA	AF	-0.218482	-0.66248	0.17661	0.0477345	0	0.43908	0.266178
1398	9	21674033	23091193	1991	212	RA	AF	0.0302173	-0.38492	0.44056	0.000913083	0	0.23402	0.877225
1412	9	34704545	36749273	2294	245	RA	AF	0.151354	-0.17523	0.5001	0.022908	0	0.25076	0.35738
1413	9	36749274	37687112	1219	177	RA	AF	0.0889001	-0.28396	0.48138	0.00790323	0	0.24221	0.626631
1472	9	128785783	129617771	1166	209	RA	AF	-0.152921	-0.54583	0.20117	0.0233847	0	0.29884	0.386359
1492	10	5396243	6234718	1564	225	RA	AF	0.121764	-0.16756	0.4169	0.0148265	0	0.17407	0.396347
1493	10	6234719	6897037	1061	183	RA	AF	0.0665055	-0.30374	0.44499	0.00442298	0	0.21208	0.712164
1500	10	12581572	13208061	1088	185	RA	AF	-0.0268775	-0.47315	0.40731	0.000722399	0	0.26504	0.895391
1501	10	13208062	14008135	1353	245	RA	AF	-0.185306	-0.59199	0.19101	0.0343385	0	0.35045	0.318709
1520	10	30919470	32457293	2011	175	RA	AF	-0.01961	-0.42534	0.38567	0.000384553	0	0.23092	0.918598
1545	10	64069688	65400431	1999	150	RA	AF	-0.144082	-0.52313	0.21646	0.0207595	0	0.27434	0.417002
1552	10	71050505	71672997	1242	210	RA	AF	-0.327399	-0.75696	0.03224	0.10719	0	0.57299	0.0770359
1677	11	68887345	69713996	1222	170	RA	AF	-0.163853	-0.64672	0.28165	0.0268478	0	0.4195	0.438874
1701	11	94384536	95327210	1186	160	RA	AF	0.141106	-0.21707	0.50297	0.0199108	0	0.25325	0.423649
1726	11	121208187	122589224	1719	204	RA	AF	-0.136343	-0.52584	0.23847	0.0185895	0	0.27838	0.456398
1733	11	128262551	129451784	1005	197	RA	AF	-0.173466	-0.41638	0.06331	0.0300905	0	0.17337	0.15218
1823	12	92061180	93487547	2107	205	RA	AF	0.253656	-0.09244	0.63944	0.0643416	0	0.40888	0.150436
1841	12	111592382	113947983	2170	168	RA	AF	0.286754	-0.09395	0.70135	0.0822281	0	0.49188	0.132332
1843	12	114685671	115439451	1287	177	RA	AF	0.097825	-0.16926	0.36894	0.00956973	0	0.13702	0.459075
1844	12	115439452	116197675	1206	199	RA	AF	-0.0121637	-0.35473	0.33481	0.000147955	0	0.1581	0.941634
1845	12	116197676	117091843	1282	196	RA	AF	0.326499	-0.09113	0.82796	0.106602	0	0.68551	0.12561
1852	12	124843769	126079935	1911	268	RA	AF	-0.227545	-0.69912	0.18112	0.0517768	0	0.48932	0.262859
1883	13	40091624	41003943	1346	185	RA	AF	-0.0367284	-0.4747	0.37597	0.00134897	0	0.25682	0.854095
1914	13	74437636	75882384	2193	215	RA	AF	0.249313	-0.09726	0.62551	0.0621571	0	0.39126	0.15234
1941	13	103050418	104378435	2319	223	RA	AF	0.248042	-0.16814	0.71173	0.0615251	0	0.50655	0.226534
1958	14	23985937	24906056	1021	154	RA	AF	-0.215988	-0.73813	0.24723	0.0466507	0	0.54512	0.336962
1999	14	68976913	69794542	1352	197	RA	AF	0.0937195	-0.33424	0.52997	0.00878334	0	0.29168	0.640591
2011	14	82524786	84087372	2532	227	RA	AF	0.179849	-0.15392	0.53092	0.0323457	0	0.28187	0.281681
2016	14	88208596	89482883	1976	149	RA	AF	0.140192	-0.3398	0.6302	0.0196537	0	0.40526	0.527067
2019	14	92101229	93386328	2071	236	RA	AF	-0.436696	-0.91245	-0.04637	0.190703	0.00415	0.83257	0.0292844
2021	14	94892241	95946792	2068	285	RA	AF	0.18082	-0.20257	0.57965	0.032696	0	0.33612	0.332026
2022	14	95946793	97174314	2064	242	RA	AF	-0.0142413	-0.42468	0.3902	0.000202815	0	0.22593	0.941495
2023	14	97174315	98268391	1577	191	RA	AF	-0.101877	-0.57611	0.3506	0.0103789	0	0.3489	0.638649
2048	15	37962916	39238840	1713	210	RA	AF	0.580506	0.23131	1	0.336988	0.0535	1	0.00204045
2055	15	47693317	49260006	1579	160	RA	AF	-0.310841	-0.71509	0.05056	0.0966222	0	0.51136	0.0922449
2072	15	69089816	70767983	2033	250	RA	AF	0.179989	-0.03389	0.40865	0.0323962	0	0.167	0.105685
2081	15	79998207	81077025	1718	230	RA	AF	0.187933	-0.11978	0.51319	0.0353187	0	0.26337	0.220969
2093	15	93707011	94565521	1553	240	RA	AF	0.0659752	-0.33543	0.48092	0.00435273	0	0.25053	0.734175
2126	16	26154123	27443061	2039	275	RA	AF	0.298841	-0.08448	0.72999	0.0893058	0	0.53289	0.114716
2150	16	72089512	73140781	1192	165	RA	AF	-0.208213	-0.45321	0.0175	0.0433525	0	0.2054	0.0746701
2165	16	83778372	84440154	1679	269	RA	AF	-0.188558	-0.56841	0.15176	0.0355542	0	0.32309	0.277907
2168	16	86058598	86748867	1507	283	RA	AF	-0.474724	-0.84336	-0.15735	0.225363	0.02476	0.71126	0.00374148
2175	17	1480057	2699135	1278	199	RA	AF	0.10734	-0.33187	0.55965	0.0115219	0	0.32726	0.599586
2178	17	4463972	5573784	1768	163	RA	AF	0.0136587	-0.33728	0.35394	0.00018656	0	0.15828	0.935496
2179	17	5573785	6305078	1325	202	RA	AF	0.172691	-0.27282	0.65549	0.0298223	0	0.43962	0.41912
2203	17	37361179	38880481	1531	109	RA	AF	-0.553358	-1	-0.175	0.306205	0.03095	1	0.0061592
2205	17	40233546	42348003	1942	171	RA	AF	-0.135926	-0.48997	0.20126	0.0184758	0	0.24068	0.417141
2216	17	54950108	56245227	1455	253	RA	AF	-0.21841	-0.52694	0.07701	0.0477031	0	0.27767	0.150573
2222	17	64438388	65582327	1685	235	RA	AF	0.135769	-0.19856	0.47983	0.0184332	0	0.23028	0.412575
2227	17	70495120	71466953	1287	245	RA	AF	-0.51171	-0.95026	-0.14705	0.261848	0.02224	0.903	0.00714452
2228	17	71466954	72383472	1357	248	RA	AF	0.0983733	-0.3209	0.54147	0.00967731	0	0.30901	0.628609
2231	17	74908267	75619256	1225	190	RA	AF	-0.0742385	-0.52363	0.35517	0.00551136	0	0.29153	0.718573
2232	17	75619257	76596287	1469	249	RA	AF	0.156776	-0.21831	0.54568	0.0245786	0	0.3004	0.395766
2246	18	7862480	8788524	1569	198	RA	AF	-0.0720026	-0.49213	0.32405	0.00518437	0	0.25784	0.707374
2262	18	28792735	30401128	2145	198	RA	AF	0.224972	-0.08887	0.57175	0.0506122	0	0.3269	0.1734
2298	18	70540350	71491860	1586	195	RA	AF	0.61186	0.27009	1	0.374372	0.07295	1	0.00101705
2318	19	10028841	11681978	2015	224	RA	AF	0.356441	0.1114	0.61916	0.12705	0.01255	0.38336	0.00478651
2449	21	34383795	35729261	1687	235	RA	AF	0.354323	0.0553	0.68595	0.125545	0.00413	0.47052	0.0256556
2450	21	35729262	37303548	2177	238	RA	AF	0.141111	-0.09364	0.37897	0.0199123	0	0.14362	0.225494
2455	21	41344743	42187152	1487	183	RA	AF	0.208149	-0.19232	0.65857	0.043326	0	0.43771	0.297974
2463	22	17587475	18535225	1477	203	RA	AF	0.420049	0.02367	0.92716	0.176441	0.00276	0.85963	0.0449753
2472	22	27192924	27952441	1391	264	RA	AF	-0.161618	-0.56639	0.20662	0.0261203	0	0.3217	0.38086
2482	22	37364005	38718589	1759	225	RA	AF	0.208259	-0.16435	0.60851	0.0433718	0	0.37052	0.260308
2483	22	38718590	40378783	1809	194	RA	AF	0.27043	-0.01247	0.57458	0.0731321	0	0.33015	0.0630213
3	1	2215496	2983519	743	107	RA	CAD	0.0611519	-0.30839	0.4228	0.00373956	0	0.19876	0.729368
10	1	7711795	8580987	1191	156	RA	CAD	-0.15677	-0.63082	0.27141	0.0245768	0	0.40033	0.452952
36	1	38474037	40200950	2216	223	RA	CAD	-0.199329	-0.57775	0.15526	0.0397319	0	0.33399	0.252433
57	1	66778016	67761890	1505	142	RA	CAD	0.214442	-0.14912	0.61506	0.0459854	0	0.37899	0.24842
88	1	101188316	102424611	1938	177	RA	CAD	-0.000286713	-0.40324	0.39344	8.22044e-08	0	0.21217	0.998806
97	1	110224231	111134062	1071	173	RA	CAD	-0.117831	-0.55483	0.29541	0.0138841	0	0.31354	0.558682
100	1	113418038	114664387	1303	141	RA	CAD	0.774231	0.61457	0.96742	0.599434	0.3777	0.9359	2.64277e-14
101	1	114664388	116207297	2423	213	RA	CAD	0.29276	0.01739	0.59723	0.0857086	0.00142	0.35668	0.0428574
112	1	153410810	154685545	1161	128	RA	CAD	0.0921306	-0.28508	0.46783	0.00848805	0	0.22811	0.609219
113	1	154685546	156813845	1632	204	RA	CAD	0.0450716	-0.33143	0.42337	0.00203145	0	0.20136	0.802162
114	1	156813846	158081627	1891	195	RA	CAD	-0.0521614	-0.44804	0.33622	0.00272081	0	0.22662	0.781787
155	1	201067953	202583884	2064	270	RA	CAD	-0.0335732	-0.39522	0.3269	0.00112716	0	0.18015	0.844476
156	1	202583885	204092537	1909	227	RA	CAD	0.132194	-0.2581	0.53773	0.0174754	0	0.29286	0.487621
159	1	205917549	208162951	1773	194	RA	CAD	-0.390509	-0.78684	-0.06213	0.152497	0.00499	0.61912	0.0259589
160	1	208162952	209711169	2024	269	RA	CAD	-0.332032	-0.78105	0.03774	0.110245	0	0.61004	0.082765
179	1	230227248	231287764	2192	247	RA	CAD	0.270944	-0.11026	0.70669	0.0734107	0	0.49941	0.15587
217	2	11995766	12732506	1219	202	RA	CAD	-0.128483	-0.58298	0.29726	0.0165078	0	0.34637	0.532664
232	2	29627933	30575619	1423	174	RA	CAD	0.0271565	-0.32778	0.38184	0.000737474	0	0.17074	0.874716
271	2	64696090	65938002	1710	199	RA	CAD	-0.0825338	-0.45229	0.26991	0.00681182	0	0.20997	0.63799
275	2	68877775	70756283	2385	218	RA	CAD	-0.160107	-0.52127	0.1746	0.0256341	0	0.27211	0.339773
290	2	84395900	85992794	2191	192	RA	CAD	0.0544863	-0.24567	0.36488	0.00296876	0	0.1416	0.714601
334	2	143259781	144503688	1495	139	RA	CAD	0.235724	-0.16521	0.6771	0.0555659	0	0.45855	0.238482
335	2	144503689	145977920	1155	161	RA	CAD	0.0329702	-0.31923	0.38944	0.00108704	0	0.17434	0.845961
360	2	174927564	176734750	2287	205	RA	CAD	0.287586	-0.04586	0.65035	0.0827059	0	0.42296	0.0902143
382	2	203639687	205038119	1528	124	RA	CAD	-0.173836	-0.35234	-0.00065	0.030219	0.00032	0.12414	0.056607
431	3	8664893	9970731	1618	262	RA	CAD	0.0197335	-0.45306	0.47985	0.000389411	0	0.3027	0.926692
434	3	11997659	12859209	1404	117	RA	CAD	0.0609852	-0.31222	0.44369	0.00371919	0	0.21203	0.736532
463	3	45844192	47588461	2297	159	RA	CAD	-0.267454	-0.79353	0.18552	0.0715317	0	0.62969	0.231439
482	3	69784970	71223281	1469	193	RA	CAD	-0.486787	-0.96515	-0.11215	0.236961	0.01393	0.93152	0.0136788
483	3	71223282	72334704	1428	258	RA	CAD	0.40864	0.02412	0.87688	0.166986	0.00318	0.76892	0.0372004
539	3	133718494	135288394	2105	231	RA	CAD	0.262941	-0.07732	0.64857	0.0691381	0	0.42064	0.133432
540	3	135288395	137372141	1984	150	RA	CAD	0.0450273	-0.33715	0.43569	0.00202746	0	0.21138	0.807958
584	3	186602046	187939199	1971	274	RA	CAD	-0.447645	-0.76773	-0.16679	0.200386	0.028	0.58941	0.00265112
610	4	10370667	11050119	1249	134	RA	CAD	-0.582017	-1	-0.16277	0.338744	0.02748	1	0.0111185
638	4	37880861	38984838	1986	244	RA	CAD	-0.462471	-0.89026	-0.11183	0.213879	0.01315	0.79256	0.01032
692	4	102544804	104384534	2243	175	RA	CAD	0.134682	-0.21484	0.49912	0.0181393	0	0.25042	0.430477
727	4	139553761	141087047	1703	225	RA	CAD	0.15318	-0.22492	0.55214	0.0234642	0	0.30945	0.417713
781	5	4636543	5828694	2097	239	RA	CAD	-0.608212	-1	-0.2672	0.369922	0.0714	1	0.00103574
785	5	9203856	10549029	1889	250	RA	CAD	0.0973333	-0.27904	0.47804	0.00947377	0	0.23181	0.594704
806	5	33971057	35157146	1678	159	RA	CAD	0.420338	0.0384	0.87061	0.176684	0.00408	0.75796	0.036844
822	5	55221399	55968966	1260	201	RA	CAD	-0.316434	-0.51569	-0.12276	0.10013	0.01507	0.26593	0.00184169
839	5	75959516	77290255	2017	234	RA	CAD	-0.063656	-0.50968	0.35814	0.00405209	0	0.27963	0.752984
868	5	110819518	111983115	1948	176	RA	CAD	-0.170688	-0.63361	0.2569	0.0291343	0	0.40311	0.414248
888	5	132554691	134556570	2436	284	RA	CAD	-0.545217	-0.94848	-0.24037	0.297262	0.05778	0.89961	0.000939932
892	5	139408117	141253830	1957	213	RA	CAD	0.0659113	-0.35561	0.49442	0.0043443	0	0.26661	0.739996
907	5	157191082	158484775	1875	204	RA	CAD	0.325736	0.02517	0.64508	0.106104	0.0022	0.41612	0.034638
915	5	166863414	168342743	1770	261	RA	CAD	-0.434733	-0.93144	-0.04551	0.188993	0.00416	0.86757	0.0299283
919	5	172285683	173606995	1989	240	RA	CAD	-0.521656	-0.94586	-0.1785	0.272125	0.03186	0.89466	0.00308548
921	5	174662886	176180301	1524	215	RA	CAD	0.275021	-0.10263	0.7155	0.0756368	0	0.51194	0.1501
926	6	63979	1380679	1844	258	RA	CAD	0.0119302	-0.27965	0.30042	0.00014233	0	0.11153	0.933161
931	6	5378214	6621937	1949	267	RA	CAD	0.175397	-0.18193	0.55531	0.0307641	0	0.30965	0.320506
948	6	23939307	24950379	1909	204	RA	CAD	-0.316282	-0.78158	0.06421	0.100035	0	0.61087	0.108553
952	6	27261036	28666364	2015	83	RA	CAD	-0.222916	-0.50867	0.05344	0.0496914	0	0.25874	0.102879
953	6	28666365	29529755	199	47	RA	CAD	-0.249051	-0.56751	0.04906	0.0620265	0	0.32207	0.0966008
957	6	30715007	31106493	251	61	RA	CAD	0.0857527	-0.19303	0.37586	0.00735353	0	0.14592	0.539613
958	6	31106494	31250556	185	34	RA	CAD	0.426468	0.1976	0.66941	0.181875	0.03905	0.44811	0.000885007
959	6	31250557	31320268	85	16	RA	CAD	0.233947	-0.10501	0.58122	0.0547312	0	0.33793	0.175561
960	6	31320269	31427209	243	36	RA	CAD	0.432324	0.19305	0.67723	0.186904	0.03727	0.45864	0.000838606
961	6	31427210	32208901	589	104	RA	CAD	0.334837	0.14937	0.5337	0.112116	0.02231	0.28484	0.00045246
964	6	32539568	32586784	40	9	RA	CAD	0.583469	0.32451	0.84309	0.340437	0.10531	0.7108	0.000125873
965	6	32586785	32629239	29	13	RA	CAD	0.192216	-0.11659	0.50559	0.0369469	0	0.256	0.225034
969	6	33194976	33864262	1104	143	RA	CAD	-0.00208512	-0.25554	0.25018	4.34772e-06	0	0.08653	0.986382
970	6	33864263	34979270	1570	143	RA	CAD	-0.147802	-0.42467	0.12086	0.0218455	0	0.18037	0.270151
971	6	34979271	36346353	1735	176	RA	CAD	-0.00710734	-0.3114	0.28717	5.05142e-05	0	0.11925	0.961823
972	6	36346354	37570051	1956	225	RA	CAD	0.0682621	-0.2258	0.35124	0.00465971	0	0.12721	0.631406
978	6	43770627	44596897	1127	220	RA	CAD	-0.0377837	-0.32097	0.24204	0.00142761	0	0.11494	0.786465
1022	6	89974268	91097024	1307	173	RA	CAD	0.208719	-0.21605	0.66734	0.0435636	0	0.4456	0.321835
1067	6	143083348	144791455	2046	244	RA	CAD	-0.00325906	-0.31398	0.28827	1.06215e-05	0	0.12331	0.982453
1073	6	150635316	151629954	2059	233	RA	CAD	0.616728	0.29044	1	0.380353	0.08436	1	0.000572471
1127	7	28890887	30175113	2175	241	RA	CAD	-0.231601	-0.6742	0.16779	0.0536391	0	0.45454	0.233011
1169	7	77663965	78685009	2056	218	RA	CAD	0.32249	-0.08072	0.78713	0.104	0	0.61957	0.111647
1208	7	128779174	130418704	2149	212	RA	CAD	0.153792	-0.17387	0.48428	0.0236519	0	0.23453	0.346769
1215	7	138755108	140217630	1888	212	RA	CAD	0.350429	0.01756	0.73687	0.122801	0.00188	0.54298	0.0451996
1263	8	18668610	19488888	1629	229	RA	CAD	0.249788	-0.1624	0.70146	0.0623942	0	0.49225	0.221367
1264	8	19488889	20135628	1287	178	RA	CAD	-0.189136	-0.53254	0.10996	0.0357725	0	0.2836	0.215092
1274	8	28344177	29744540	1516	189	RA	CAD	-0.0995518	-0.55449	0.33299	0.00991055	0	0.32075	0.630922
1276	8	31134787	32454962	2423	183	RA	CAD	-0.12131	-0.59115	0.31359	0.014716	0	0.35152	0.566468
1351	8	125453323	126766827	1831	219	RA	CAD	-0.206678	-0.51477	0.07723	0.0427158	0	0.26508	0.152917
1353	8	128073655	129291118	1954	272	RA	CAD	0.0462862	-0.25519	0.34988	0.00214241	0	0.13046	0.750308
1377	9	4596615	5437591	1144	148	RA	CAD	-0.197427	-0.73484	0.26724	0.0389775	0	0.54077	0.382266
1388	9	13512853	14244747	1275	196	RA	CAD	-0.121544	-0.50793	0.23337	0.0147729	0	0.25965	0.49384
1398	9	21674033	23091193	1992	212	RA	CAD	-0.351618	-0.5794	-0.15413	0.123635	0.02376	0.33571	0.000716887
1424	9	78630916	79451035	1381	216	RA	CAD	0.0989976	-0.36076	0.59979	0.00980053	0	0.38825	0.652352
1467	9	122677720	124119883	1336	158	RA	CAD	0.159842	-0.28342	0.6174	0.0255496	0	0.38539	0.447994
1512	10	24489448	25577761	1295	204	RA	CAD	0.156298	-0.15593	0.47712	0.0244292	0	0.22792	0.31453
1520	10	30919470	32457293	2012	175	RA	CAD	0.108601	-0.2507	0.46839	0.0117942	0	0.22424	0.534423
1544	10	62626466	64069687	2052	189	RA	CAD	-0.140106	-0.426	0.12937	0.0196298	0	0.18147	0.313765
1545	10	64069688	65400431	2000	150	RA	CAD	0.00717697	-0.38124	0.38948	5.15089e-05	0	0.19916	0.969333
1568	10	88443653	89971628	1506	188	RA	CAD	-0.114945	-0.62225	0.34358	0.0132123	0	0.40403	0.607078
1569	10	89971629	91021321	1595	195	RA	CAD	0.240833	-0.08235	0.59889	0.0580004	0	0.35867	0.134493
1597	10	123856185	124894142	1740	211	RA	CAD	-0.183813	-0.43374	0.05312	0.0337872	0	0.18813	0.132434
1601	10	127997709	129134738	1379	206	RA	CAD	0.559166	0.18903	1	0.312667	0.03582	1	0.00370143
1603	10	129831970	130694008	1494	237	RA	CAD	-0.362061	-0.75586	-0.01246	0.131088	0.00213	0.57132	0.0424111
1624	11	11632651	12470449	1512	230	RA	CAD	0.401731	-0.00479	0.89692	0.161388	0	0.80447	0.0502251
1625	11	12470450	13364727	1270	180	RA	CAD	-0.339979	-0.76695	0.0245	0.115586	0	0.58821	0.0719366
1671	11	60515106	61717117	1150	159	RA	CAD	0.617986	0.2944	0.99456	0.381907	0.08667	0.98914	0.000468954
1677	11	68887345	69713996	1222	170	RA	CAD	0.0192475	-0.3233	0.35569	0.000370465	0	0.15885	0.905623
1701	11	94384536	95327210	1187	160	RA	CAD	-0.219163	-0.59203	0.12339	0.0480325	0	0.3505	0.203745
1723	11	117295642	118901213	2334	262	RA	CAD	-0.00427768	-0.35444	0.34359	1.82985e-05	0	0.16553	0.97968
1724	11	118901214	120064528	1514	195	RA	CAD	0.11496	-0.34242	0.59557	0.0132157	0	0.36812	0.604044
1726	11	121208187	122589224	1719	204	RA	CAD	-0.15161	-0.56991	0.23688	0.0229856	0	0.32608	0.423676
1733	11	128262551	129451784	1005	197	RA	CAD	-0.225574	-0.56819	0.09475	0.0508838	0	0.32284	0.153058
1841	12	111592382	113947983	2171	168	RA	CAD	0.82683	0.58145	1	0.683648	0.33809	1	2.23433e-08
1843	12	114685671	115439451	1288	177	RA	CAD	-0.184087	-0.51512	0.13173	0.0338882	0	0.26535	0.239585
1844	12	115439452	116197675	1206	199	RA	CAD	0.128817	-0.28116	0.56042	0.0165939	0	0.31933	0.520534
1852	12	124843769	126079935	1914	269	RA	CAD	-0.18845	-0.49893	0.09372	0.0355135	0	0.24893	0.18785
1873	13	28587126	30068525	2072	200	RA	CAD	-0.6187	-1	-0.30689	0.38279	0.09418	1	0.000257693
1874	13	30068526	31433218	2290	239	RA	CAD	0.408163	0.07458	0.81749	0.166597	0.00654	0.6683	0.0188248
1966	14	33591114	34695195	1524	298	RA	CAD	-0.0123091	-0.40025	0.37596	0.000151514	0	0.19863	0.946896
1999	14	68976913	69794542	1354	197	RA	CAD	0.188842	-0.25991	0.66679	0.0356614	0	0.44651	0.379769
2048	15	37962916	39238840	1713	210	RA	CAD	0.725367	0.44033	1	0.526157	0.19389	1	8.75609e-06
2055	15	47693317	49260006	1595	160	RA	CAD	-0.718669	-1	-0.33846	0.516485	0.11456	1	0.000655657
2071	15	67396521	69089815	1996	207	RA	CAD	-0.518408	-0.82785	-0.25811	0.268747	0.06662	0.68534	0.000193861
2072	15	69089816	70767983	2035	250	RA	CAD	-0.231975	-0.53345	0.04086	0.0538126	0	0.28457	0.0977834
2081	15	79998207	81077025	1720	230	RA	CAD	-0.213749	-0.6623	0.17652	0.0456884	0	0.43913	0.270679
2150	16	72089512	73140781	1192	165	RA	CAD	-0.054934	-0.45095	0.34069	0.00301775	0	0.22551	0.772199
2166	16	84440155	85146805	1648	257	RA	CAD	-0.0528458	-0.47974	0.35047	0.00279268	0	0.25217	0.788467
2167	16	85146806	86058597	1021	230	RA	CAD	-0.219872	-0.54033	0.07749	0.0483435	0	0.29196	0.15223
2168	16	86058598	86748867	1507	283	RA	CAD	0.0444606	-0.27778	0.3632	0.00197675	0	0.14553	0.775502
2175	17	1480057	2699135	1279	199	RA	CAD	0.102007	-0.21161	0.42655	0.0104054	0	0.18711	0.510564
2205	17	40233546	42348003	1942	171	RA	CAD	0.0324688	-0.26389	0.32654	0.00105422	0	0.12338	0.824198
2206	17	42348004	43460500	1218	140	RA	CAD	-0.104382	-0.56074	0.32565	0.0108957	0	0.32702	0.613634
2210	17	47516225	48722590	1210	240	RA	CAD	-0.0547252	-0.49002	0.36219	0.00299485	0	0.26368	0.784105
2216	17	54950108	56245227	1456	253	RA	CAD	-0.0759968	-0.44274	0.27091	0.00577551	0	0.20181	0.658592
2218	17	58652810	60453120	1238	156	RA	CAD	0.254942	-0.14036	0.68497	0.0649955	0	0.46919	0.191881
2222	17	64438388	65582327	1692	235	RA	CAD	0.322148	-0.06633	0.77483	0.103779	0	0.60036	0.104022
2227	17	70495120	71466953	1289	245	RA	CAD	-0.0602237	-0.44581	0.30515	0.00362689	0	0.21164	0.738613
2228	17	71466954	72383472	1359	248	RA	CAD	0.524234	0.12208	1	0.274821	0.0173	1	0.0137262
2232	17	75619257	76596287	1469	249	RA	CAD	0.276251	-0.12122	0.70535	0.0763144	0	0.49752	0.160215
2251	18	12735559	13641479	1346	183	RA	CAD	0.00787443	-0.28382	0.30098	6.20067e-05	0	0.11345	0.95589
2262	18	28792735	30401128	2145	198	RA	CAD	0.140199	-0.27003	0.5823	0.0196557	0	0.34558	0.485639
2312	19	4741719	5478684	1036	191	RA	CAD	0.15679	-0.21097	0.53462	0.0245832	0	0.28582	0.386521
2314	19	6455429	7249359	1236	188	RA	CAD	0.113676	-0.31742	0.57523	0.0129222	0	0.33914	0.587251
2318	19	10028841	11681978	2019	224	RA	CAD	-0.272816	-0.41148	-0.13633	0.0744284	0.01859	0.16932	0.000133699
2324	19	16079007	17045963	1240	118	RA	CAD	-0.240288	-0.68104	0.15106	0.0577384	0	0.46382	0.216433
2327	19	18504868	19749166	1296	129	RA	CAD	-0.0301712	-0.35152	0.29078	0.000910302	0	0.14301	0.848119
2351	19	45040933	45893307	911	148	RA	CAD	0.0378031	-0.22226	0.2925	0.00142908	0	0.09261	0.758608
2380	20	10279604	11257012	1544	187	RA	CAD	-0.152107	-0.52466	0.1969	0.0231367	0	0.27736	0.383516
2390	20	18959420	19957928	1640	208	RA	CAD	0.102313	-0.32791	0.54123	0.0104679	0	0.30465	0.61773
2400	20	33890061	35990261	1661	149	RA	CAD	0.0310143	-0.35896	0.40907	0.00096189	0	0.1978	0.867845
2408	20	44072211	45673603	2328	243	RA	CAD	-0.192701	-0.53348	0.13308	0.0371338	0	0.28497	0.240843
2449	21	34383795	35729261	1687	235	RA	CAD	-0.145998	-0.36681	0.06326	0.0213153	0	0.13455	0.173167
2450	21	35729262	37303548	2177	238	RA	CAD	0.259375	-0.0853	0.64496	0.0672754	0	0.41597	0.138728
2472	22	27192924	27952441	1392	264	RA	CAD	0.446088	0.0942	0.85468	0.198995	0.00934	0.73048	0.0142522
2482	22	37364005	38718589	1760	226	RA	CAD	-0.423528	-0.80436	-0.1007	0.179376	0.01065	0.64699	0.0125936
14	1	11709174	13481025	1341	159	RA	VTE	0.375546	-0.01954	0.8428	0.141035	0	0.71138	0.0680836
34	1	35201627	36855139	1015	104	RA	VTE	-0.250232	-0.73416	0.18159	0.062616	0	0.53899	0.247173
36	1	38474037	40200950	2193	221	RA	VTE	0.289328	-0.14947	0.78744	0.0837109	0	0.62216	0.172171
57	1	66778016	67761890	1497	141	RA	VTE	0.351992	-0.03926	0.79433	0.123898	0	0.63097	0.0724442
112	1	153410810	154685545	1150	127	RA	VTE	-0.229256	-0.72771	0.21941	0.0525581	0	0.53132	0.291123
113	1	154685546	156813845	1624	203	RA	VTE	0.214771	-0.07845	0.51259	0.0461268	0	0.26275	0.14435
118	1	161054077	161945442	1244	115	RA	VTE	0.457356	0.05283	0.92807	0.209175	0.00611	0.86131	0.0288803
125	1	167163955	168179086	1259	171	RA	VTE	0.150184	-0.18039	0.4992	0.0225553	0	0.24925	0.354693
130	1	172465154	173582511	1170	143	RA	VTE	0.299789	-0.02232	0.67354	0.0898735	0	0.45366	0.0717676
154	1	200134006	201067952	1318	143	RA	VTE	-0.353297	-0.76621	0.01167	0.124819	0	0.58708	0.0581546
155	1	201067953	202583884	2048	267	RA	VTE	0.00831945	-0.305	0.32101	6.92132e-05	0	0.13182	0.957096
156	1	202583885	204092537	1891	226	RA	VTE	-0.0344346	-0.40563	0.32868	0.00118574	0	0.18855	0.843723
159	1	205917549	208162951	1764	192	RA	VTE	0.433651	0.17027	0.71542	0.188053	0.02899	0.51182	0.00181467
179	1	230227248	231287764	2180	245	RA	VTE	0.129632	-0.24679	0.52883	0.0168044	0	0.28506	0.489015
250	2	45189469	45850047	1024	189	RA	VTE	0.29616	-0.05407	0.68648	0.087711	0	0.47157	0.0965762
271	2	64696090	65938002	1698	196	RA	VTE	-0.504778	-0.87597	-0.18346	0.254801	0.03366	0.76733	0.0027293
274	2	67979829	68877774	1370	131	RA	VTE	0.167074	-0.16169	0.51628	0.0279136	0	0.26676	0.313177
275	2	68877775	70756283	2376	217	RA	VTE	0.0823854	-0.27773	0.44577	0.00678736	0	0.21664	0.636867
290	2	84395900	85992794	2177	191	RA	VTE	-0.454405	-0.94969	-0.07053	0.206484	0.00674	0.90191	0.0237602
378	2	198140351	199654969	1210	99	RA	VTE	0.558102	0.16073	1	0.311478	0.02622	1	0.00878646
399	2	222327714	223353965	1194	151	RA	VTE	-0.831268	-1	-0.42815	0.691006	0.18331	1	0.000276088
424	3	2140012	3128152	1699	268	RA	VTE	0.535787	0.14297	1	0.287068	0.02071	1	0.00892563
425	3	3128153	4109393	1900	233	RA	VTE	-0.662177	-1	-0.31672	0.438478	0.10031	1	0.000398959
474	3	61277588	62609818	1653	255	RA	VTE	-0.1706	-0.58092	0.19274	0.0291044	0	0.33986	0.357105
483	3	71223282	72334704	1423	257	RA	VTE	0.0973983	-0.33913	0.55515	0.00948643	0	0.31969	0.641976
519	3	113657666	115649909	2051	237	RA	VTE	0.234408	-0.17739	0.6787	0.0549469	0	0.46063	0.241176
584	3	186602046	187939199	1959	272	RA	VTE	-0.194148	-0.53436	0.12831	0.0376933	0	0.28572	0.231482
585	3	187939200	189451805	1953	227	RA	VTE	-0.0944465	-0.51799	0.31017	0.00892014	0	0.27867	0.625694
624	4	25832019	27385580	1571	215	RA	VTE	0.183929	-0.07827	0.45742	0.03383	0	0.20923	0.164573
638	4	37880861	38984838	1967	242	RA	VTE	0.0618203	-0.3285	0.46011	0.00382175	0	0.22764	0.739806
727	4	139553761	141087047	1696	225	RA	VTE	0.199312	-0.20091	0.62454	0.0397252	0	0.39005	0.305745
822	5	55221399	55968966	1254	199	RA	VTE	-0.158391	-0.47358	0.14002	0.0250876	0	0.22517	0.275668
839	5	75959516	77290255	2009	232	RA	VTE	0.27355	-0.10156	0.70668	0.0748295	0	0.4994	0.149616
854	5	95117260	96467377	1902	186	RA	VTE	-0.59221	-1	-0.26577	0.350713	0.07063	1	0.000832415
888	5	132554691	134556570	2418	282	RA	VTE	-0.116168	-0.42577	0.17738	0.0134949	0	0.18165	0.42964
915	5	166863414	168342743	1754	260	RA	VTE	-0.16869	-0.48296	0.14034	0.0284565	0	0.23339	0.274212
918	5	170898341	172285682	1881	266	RA	VTE	-0.227392	-0.60552	0.11087	0.051707	0	0.36666	0.186115
920	5	173606996	174662885	1705	239	RA	VTE	0.0537878	-0.30619	0.41181	0.00289313	0	0.18511	0.757587
931	6	5378214	6621937	1934	265	RA	VTE	-0.220895	-0.5799	0.11855	0.0487945	0	0.33628	0.188745
949	6	24950380	25684629	1675	157	RA	VTE	0.203019	-0.06186	0.46824	0.0412166	0	0.21925	0.1296
950	6	25684630	26396200	1376	90	RA	VTE	-0.0266349	-0.28648	0.22907	0.00070942	0	0.09183	0.835017
953	6	28666365	29529755	197	47	RA	VTE	0.182091	-0.12489	0.49509	0.0331572	0	0.24511	0.22944
954	6	29529756	29833843	242	31	RA	VTE	-0.168077	-0.48702	0.13977	0.0282499	0	0.23792	0.276307
955	6	29833844	30070717	25	11	RA	VTE	0.429657	0.11803	0.73061	0.184605	0.01393	0.53379	0.00915328
956	6	30070718	30715006	30	17	RA	VTE	-0.0156692	-0.38841	0.35366	0.000245525	0	0.18776	0.930702
957	6	30715007	31106493	251	61	RA	VTE	-0.098782	-0.28834	0.08713	0.00975788	0	0.08314	0.294681
958	6	31106494	31250556	185	34	RA	VTE	-0.140966	-0.35288	0.07004	0.0198714	0	0.12452	0.188476
959	6	31250557	31320268	85	16	RA	VTE	0.254532	0.03409	0.47555	0.0647866	0.00164	0.22615	0.0297092
960	6	31320269	31427209	236	35	RA	VTE	0.317913	0.13747	0.49207	0.101069	0.0189	0.24213	0.000811818
961	6	31427210	32208901	588	104	RA	VTE	-0.0605029	-0.23634	0.10935	0.0036606	0	0.05615	0.482429
965	6	32586785	32629239	29	13	RA	VTE	0.0873875	-0.26814	0.43544	0.00763658	0	0.19601	0.611084
967	6	32682214	32897998	319	51	RA	VTE	0.0788446	-0.20927	0.36481	0.00621648	0	0.13791	0.573946
970	6	33864263	34979270	1562	142	RA	VTE	-0.0243441	-0.30771	0.25243	0.000592634	0	0.10835	0.858864
971	6	34979271	36346353	1731	176	RA	VTE	-0.297186	-0.69479	0.04662	0.0883197	0	0.48273	0.0981944
972	6	36346354	37570051	1945	224	RA	VTE	-0.257664	-0.54396	0.01996	0.066391	0	0.29589	0.0638153
1063	6	137553213	138825721	2106	199	RA	VTE	0.112026	-0.14795	0.38904	0.0125499	0	0.15259	0.393728
1067	6	143083348	144791455	2030	242	RA	VTE	0.0176437	-0.27114	0.31197	0.000311299	0	0.11188	0.902294
1126	7	27351287	28890886	2122	250	RA	VTE	0.279775	-0.01889	0.60522	0.0782741	0	0.36629	0.0664166
1127	7	28890887	30175113	2142	240	RA	VTE	0.103338	-0.33685	0.57519	0.0106788	0	0.34454	0.627646
1171	7	80055722	81533566	1945	192	RA	VTE	0.324095	-0.13142	0.85916	0.105037	0	0.73815	0.150732
1215	7	138755108	140217630	1873	210	RA	VTE	-0.165887	-0.55568	0.19421	0.0275183	0	0.30918	0.359767
1250	8	10478852	11466761	1676	193	RA	VTE	0.383073	0.05572	0.75067	0.146745	0.00507	0.5635	0.0241521
1353	8	128073655	129291118	1946	270	RA	VTE	0.111812	-0.17647	0.40891	0.012502	0	0.16914	0.43769
1356	8	131545726	132534636	1777	179	RA	VTE	0.233506	-0.08575	0.58531	0.054525	0	0.34258	0.165335
1358	8	133461552	134509448	1681	216	RA	VTE	0.252	-0.08804	0.62031	0.0635041	0	0.38479	0.140789
1381	9	8262304	9170120	1873	219	RA	VTE	-0.453813	-0.88255	-0.09729	0.205947	0.01039	0.77889	0.0148027
1412	9	34704545	36749273	2291	245	RA	VTE	-0.186078	-0.59493	0.19789	0.0346249	0	0.35789	0.31917
1461	9	116159541	117054909	1390	192	RA	VTE	0.425105	0.13892	0.75418	0.180715	0.01934	0.56879	0.00567387
1495	10	7659873	8771920	2163	246	RA	VTE	0.126406	-0.20972	0.47801	0.0159785	0	0.23125	0.449868
1544	10	62626466	64069687	2041	188	RA	VTE	-0.00790879	-0.35863	0.34848	6.2549e-05	0	0.16439	0.963235
1552	10	71050505	71672997	1239	209	RA	VTE	0.0248445	-0.2162	0.27711	0.000617251	0	0.08377	0.837193
1554	10	72659224	73514214	1502	236	RA	VTE	0.150646	-0.26951	0.61568	0.0226941	0	0.38334	0.457988
1597	10	123856185	124894142	1726	210	RA	VTE	0.0949219	-0.25821	0.47073	0.00901016	0	0.22531	0.585767
1603	10	129831970	130694008	1487	237	RA	VTE	-0.0639427	-0.40236	0.26712	0.00408867	0	0.17016	0.696807
1624	11	11632651	12470449	1500	227	RA	VTE	0.207448	-0.18872	0.65439	0.0430346	0	0.42914	0.296412
1664	11	51581596	55477633	1260	10	RA	VTE	0.26059	-0.1656	0.66256	0.0679072	0	0.43899	0.20987
1671	11	60515106	61717117	1144	157	RA	VTE	0.118365	-0.17961	0.42207	0.0140103	0	0.18065	0.427027
1678	11	69713997	71242834	2445	244	RA	VTE	-0.270475	-0.77444	0.13835	0.0731565	0	0.59976	0.193082
1733	11	128262551	129451784	1000	194	RA	VTE	-0.0653114	-0.30686	0.17603	0.00426558	0	0.09526	0.585061
1805	12	70097806	71177961	2086	160	RA	VTE	0.400386	0.00592	0.85569	0.160309	0.00259	0.73221	0.0454164
1823	12	92061180	93487547	2096	204	RA	VTE	0.0974343	-0.27756	0.47342	0.00949345	0	0.23285	0.593353
1841	12	111592382	113947983	2161	167	RA	VTE	0.260442	-0.05184	0.60217	0.0678298	0	0.36261	0.107535
1852	12	124843769	126079935	1900	266	RA	VTE	0.438257	0.03689	0.95273	0.192069	0.00382	0.9077	0.0368528
1873	13	28587126	30068525	2063	199	RA	VTE	-0.0822206	-0.57988	0.38369	0.00676023	0	0.36055	0.709926
1945	13	107037865	108521978	2053	275	RA	VTE	-0.0384159	-0.42663	0.33921	0.00147578	0	0.20767	0.833366
1958	14	23985937	24906056	1011	152	RA	VTE	-0.231495	-0.63935	0.13884	0.0535901	0	0.40916	0.212159
1966	14	33591114	34695195	1513	297	RA	VTE	0.154768	-0.1887	0.52116	0.0239531	0	0.27423	0.371065
2019	14	92101229	93386328	2058	236	RA	VTE	0.0719712	-0.22468	0.37718	0.00517985	0	0.1485	0.627885
2021	14	94892241	95946792	2053	284	RA	VTE	-0.29654	-0.59495	-0.0252	0.0879357	0.00195	0.35397	0.0369073
2023	14	97174315	98268391	1568	191	RA	VTE	-0.322686	-0.854	0.11448	0.104126	0	0.72931	0.140726
2071	15	67396521	69089815	1988	206	RA	VTE	0.174672	-0.23276	0.61002	0.0305102	0	0.37545	0.386059
2081	15	79998207	81077025	1710	228	RA	VTE	-0.13369	-0.55687	0.26778	0.017873	0	0.31179	0.489089
2126	16	26154123	27443061	2027	274	RA	VTE	0.0683978	-0.24676	0.3849	0.00467825	0	0.15434	0.658768
2128	16	29043178	31384210	1115	115	RA	VTE	0.112399	-0.28366	0.52411	0.0126335	0	0.27701	0.565698
2165	16	83778372	84440154	1675	269	RA	VTE	0.125028	-0.20458	0.46614	0.0156319	0	0.21834	0.445543
2166	16	84440155	85146805	1641	256	RA	VTE	-0.526704	-0.97282	-0.1719	0.277417	0.02994	0.94638	0.00477652
2167	16	85146806	86058597	1009	228	RA	VTE	0.115	-0.18367	0.41939	0.0132251	0	0.17691	0.449995
2175	17	1480057	2699135	1273	198	RA	VTE	-0.00399315	-0.3394	0.32486	1.59453e-05	0	0.14826	0.979787
2184	17	10572618	11778164	1490	197	RA	VTE	-0.0224246	-0.4103	0.36264	0.000502865	0	0.20811	0.904951
2198	17	31318754	32356061	1710	234	RA	VTE	-0.278245	-0.69954	0.09424	0.0774204	0	0.48936	0.133194
2210	17	47516225	48722590	1200	239	RA	VTE	-0.0200679	-0.35589	0.31499	0.000402723	0	0.14897	0.9031
2228	17	71466954	72383472	1343	246	RA	VTE	0.382647	-0.04106	0.89898	0.146418	0	0.80816	0.0754956
2231	17	74908267	75619256	1217	189	RA	VTE	0.0115058	-0.33285	0.35229	0.000132383	0	0.16073	0.946026
2247	18	8788525	9816164	1934	241	RA	VTE	-0.288768	-0.67349	0.04627	0.083387	0	0.45359	0.0871727
2314	19	6455429	7249359	1230	187	RA	VTE	0.446089	0.07064	0.91174	0.198995	0.00729	0.83127	0.0264442
2318	19	10028841	11681978	2011	224	RA	VTE	-0.448306	-0.58813	-0.31328	0.200978	0.09814	0.34589	3.24965e-09
2324	19	16079007	17045963	1230	117	RA	VTE	0.34272	-0.04999	0.78363	0.117457	0	0.61408	0.0851881
2327	19	18504868	19749166	1292	129	RA	VTE	0.140111	-0.26436	0.57608	0.019631	0	0.33414	0.483212
2351	19	45040933	45893307	908	148	RA	VTE	-0.296854	-0.68541	0.04796	0.0881224	0	0.46979	0.0922726
2400	20	33890061	35990261	1653	148	RA	VTE	0.0567075	-0.2206	0.32802	0.00321574	0	0.11586	0.681163
2408	20	44072211	45673603	2313	242	RA	VTE	0.562715	0.20876	1	0.316648	0.04358	1	0.00307573
2415	20	51533751	52411532	941	198	RA	VTE	0.0144057	-0.45873	0.48586	0.000207524	0	0.32869	0.947637
2435	21	19479025	20407307	1578	182	RA	VTE	-0.0848112	-0.52369	0.32674	0.00719294	0	0.28575	0.674214
2449	21	34383795	35729261	1679	234	RA	VTE	-0.0815945	-0.44477	0.27363	0.00665767	0	0.20623	0.638254
2450	21	35729262	37303548	2169	236	RA	VTE	0.00572346	-0.35886	0.38536	3.2758e-05	0	0.18539	0.974162
2463	22	17587475	18535225	1470	202	RA	VTE	0.145169	-0.25872	0.58083	0.021074	0	0.33902	0.464273
2473	22	27952442	29457601	1640	187	RA	VTE	0.298824	-0.06206	0.69589	0.0892958	0	0.48427	0.0978236
2482	22	37364005	38718589	1753	225	RA	VTE	0.136052	-0.20183	0.49064	0.01851	0	0.24098	0.414967
26	1	23907046	25885138	1949	209	RA	HF	0.124191	-0.29982	0.55545	0.0154235	0	0.31572	0.533159
60	1	69438910	70992905	1907	187	RA	HF	-0.208722	-0.71248	0.23955	0.0435649	0	0.50765	0.334211
97	1	110224231	111134062	996	167	RA	HF	0.483173	0.05655	1	0.233456	0.00625	1	0.0335052
101	1	114664388	116207297	2374	209	RA	HF	0.373463	0.00081	0.81279	0.139474	0.00192	0.66063	0.0483332
125	1	167163955	168179086	1227	168	RA	HF	0.0440846	-0.33909	0.43303	0.00194345	0	0.21348	0.809583
159	1	205917549	208162951	1718	188	RA	HF	-0.190632	-0.60833	0.1986	0.0363405	0	0.37123	0.314634
160	1	208162952	209711169	1967	263	RA	HF	-0.395368	-0.7895	-0.05014	0.156316	0.00399	0.62331	0.0252996
424	3	2140012	3128152	1669	266	RA	HF	0.122874	-0.29945	0.56671	0.0150979	0	0.33409	0.545701
461	3	42301658	44141693	2168	224	RA	HF	0.128228	-0.30431	0.5986	0.0164425	0	0.36411	0.541354
474	3	61277588	62609818	1604	250	RA	HF	0.285513	-0.08075	0.71062	0.0815174	0	0.50499	0.124462
478	3	65326752	66702084	1702	225	RA	HF	-0.058475	-0.51492	0.37904	0.00341933	0	0.29884	0.776739
519	3	113657666	115649909	1986	231	RA	HF	0.759787	0.37969	1	0.577277	0.14417	1	0.000377534
584	3	186602046	187939199	1910	266	RA	HF	0.0620211	-0.2102	0.33405	0.00384661	0	0.11459	0.651812
603	4	5972710	7135819	1688	270	RA	HF	-0.179396	-0.66636	0.25024	0.0321829	0	0.4446	0.39655
638	4	37880861	38984838	1904	237	RA	HF	-0.553782	-1	-0.18438	0.306675	0.03407	1	0.0051237
764	4	181122434	182065646	1644	226	RA	HF	0.0258947	-0.40905	0.4618	0.000670536	0	0.26126	0.899145
785	5	9203856	10549029	1849	247	RA	HF	-0.175512	-0.5474	0.17583	0.0308045	0	0.30006	0.319308
888	5	132554691	134556570	2301	275	RA	HF	-0.390319	-0.73407	-0.08585	0.152349	0.00833	0.53887	0.0122514
919	5	172285683	173606995	1932	234	RA	HF	0.128859	-0.29635	0.57219	0.0166048	0	0.33202	0.518425
920	5	173606996	174662885	1660	235	RA	HF	0.286125	-0.05583	0.66348	0.0818674	0	0.44021	0.1058
921	5	174662886	176180301	1480	211	RA	HF	-0.304329	-0.7153	0.04661	0.0926161	0	0.51518	0.0926162
926	6	63979	1380679	1754	251	RA	HF	-0.181324	-0.50095	0.12441	0.0328786	0	0.25095	0.240224
971	6	34979271	36346353	1655	172	RA	HF	0.0644559	-0.34577	0.46336	0.00415457	0	0.23181	0.731912
972	6	36346354	37570051	1858	217	RA	HF	0.126533	-0.20048	0.45907	0.0160106	0	0.211	0.43419
978	6	43770627	44596897	1088	216	RA	HF	-0.120457	-0.49516	0.23974	0.0145099	0	0.24845	0.5021
980	6	45408422	46430701	1220	147	RA	HF	0.242014	-0.16505	0.69284	0.0585706	0	0.48051	0.239934
1089	6	165835954	166853325	133	97	RA	HF	0.108713	-0.36502	0.59079	0.0118186	0	0.35932	0.618346
1113	7	13676748	15013694	1932	235	RA	HF	0.40447	0.04198	0.82348	0.163596	0.00375	0.67812	0.0310295
1125	7	25671576	27351286	2346	220	RA	HF	0.185674	-0.21202	0.62718	0.0344749	0	0.39548	0.35004
1215	7	138755108	140217630	1794	203	RA	HF	-0.451593	-0.83031	-0.12559	0.203937	0.01594	0.68942	0.00712537
1227	7	154407488	155280610	1565	224	RA	HF	0.131432	-0.32299	0.61756	0.0172744	0	0.38924	0.544259
1250	8	10478852	11466761	1637	191	RA	HF	-0.0209467	-0.39236	0.33187	0.000438763	0	0.18813	0.9065
1280	8	36641175	38803980	1873	224	RA	HF	-0.256845	-0.68169	0.12174	0.0659692	0	0.4647	0.180051
1307	8	72013185	72917489	1382	191	RA	HF	-0.123624	-0.45708	0.19768	0.0152829	0	0.21165	0.440295
1330	8	101448440	102548680	1293	181	RA	HF	-0.00497713	-0.43666	0.42893	2.47718e-05	0	0.25341	0.980159
1398	9	21674033	23091193	1955	210	RA	HF	-0.168487	-0.52819	0.1734	0.0283877	0	0.27899	0.317301
1424	9	78630916	79451035	1335	208	RA	HF	-0.00100054	-0.39671	0.39468	1.00107e-06	0	0.20936	0.995787
1499	10	11856925	12581571	1184	165	RA	HF	0.295919	-0.16753	0.83731	0.0875682	0	0.70109	0.19146
1512	10	24489448	25577761	1216	193	RA	HF	0.12829	-0.28729	0.56132	0.0164583	0	0.32037	0.524369
1568	10	88443653	89971628	1442	181	RA	HF	-0.0170966	-0.41913	0.35773	0.000292293	0	0.20594	0.925578
1601	10	127997709	129134738	1330	198	RA	HF	0.47552	0.15187	0.863	0.22612	0.02312	0.74476	0.0067542
1624	11	11632651	12470449	1485	224	RA	HF	0.618652	0.22391	1	0.382731	0.05014	1	0.0041905
1744	12	3871115	4967643	1342	226	RA	HF	0.414864	-0.01495	0.998	0.172112	0	0.99601	0.0630497
1915	13	75882385	76671493	1367	144	RA	HF	0.19733	-0.25468	0.70728	0.0389392	0	0.50253	0.367202
2021	14	94892241	95946792	1980	277	RA	HF	-0.104771	-0.46457	0.24137	0.010977	0	0.21733	0.532335
2081	15	79998207	81077025	1659	221	RA	HF	0.336296	-0.0002	0.70266	0.113095	0	0.49373	0.0504805
2093	15	93707011	94565521	1532	236	RA	HF	0.393367	0.06394	0.76152	0.154738	0.00497	0.57991	0.0213798
2166	16	84440155	85146805	1594	251	RA	HF	0.188472	-0.24982	0.6633	0.0355218	0	0.44069	0.373013
2168	16	86058598	86748867	1439	275	RA	HF	-0.427413	-0.82676	-0.1007	0.182681	0.01088	0.68354	0.0133579
2216	17	54950108	56245227	1382	251	RA	HF	-0.0740989	-0.41057	0.26351	0.00549064	0	0.17534	0.651162
2227	17	70495120	71466953	1228	238	RA	HF	0.0464705	-0.34253	0.44659	0.0021595	0	0.22511	0.804906
2228	17	71466954	72383472	1285	241	RA	HF	0.405271	0.01528	0.88754	0.164245	0.00278	0.78772	0.0464429
2231	17	74908267	75619256	1125	185	RA	HF	-0.0930964	-0.5359	0.32823	0.00866694	0	0.30036	0.643567
2247	18	8788525	9816164	1871	234	RA	HF	0.120094	-0.30165	0.5799	0.0144225	0	0.3403	0.558312
2318	19	10028841	11681978	1867	215	RA	HF	0.098898	-0.14981	0.35545	0.00978082	0	0.12648	0.423512
2380	20	10279604	11257012	1505	184	RA	HF	-0.0724148	-0.43582	0.27532	0.0052439	0	0.19492	0.674627
2447	21	32202240	33270272	1518	167	RA	HF	-0.0839886	-0.53057	0.34528	0.00705408	0	0.30115	0.682934
2449	21	34383795	35729261	1606	224	RA	HF	0.00963525	-0.27856	0.29854	9.2838e-05	0	0.10759	0.946842
2450	21	35729262	37303548	2111	228	RA	HF	0.154333	-0.20963	0.53678	0.0238188	0	0.28843	0.386999
2458	21	43812792	44815008	143	92	RA	HF	0.148874	-0.34814	0.67288	0.0221636	0	0.47161	0.530195
88	1	101188316	102424611	1898	171	RA	PAD	-0.239872	-0.61926	0.10233	0.0575387	0	0.38349	0.173851
122	1	164726580	165553812	1363	185	RA	PAD	0.193338	-0.19476	0.61371	0.0373795	0	0.37738	0.320168
155	1	201067953	202583884	2011	260	RA	PAD	-0.168334	-0.47153	0.11546	0.0283363	0	0.22234	0.248654
156	1	202583885	204092537	1886	224	RA	PAD	0.200247	-0.1287	0.53755	0.040099	0	0.28896	0.218268
160	1	208162952	209711169	1997	264	RA	PAD	-0.522885	-0.94985	-0.19322	0.273409	0.03733	0.90221	0.00260489
269	2	62429911	63672118	1226	159	RA	PAD	-0.028097	-0.48828	0.42455	0.000789439	0	0.27781	0.894179
274	2	67979829	68877774	1296	127	RA	PAD	0.304599	-0.12224	0.77445	0.0927807	0	0.59977	0.155848
312	2	119635490	121073752	1964	179	RA	PAD	-0.545076	-0.96985	-0.2072	0.297108	0.04293	0.94061	0.00315581
483	3	71223282	72334704	1401	252	RA	PAD	-0.489517	-1	-0.09529	0.239627	0.01043	1	0.0174361
512	3	106174686	107736519	2012	201	RA	PAD	-0.120213	-0.60847	0.33731	0.0144511	0	0.38094	0.579073
539	3	133718494	135288394	2061	225	RA	PAD	-0.159272	-0.57789	0.21524	0.0253677	0	0.33653	0.392557
603	4	5972710	7135819	1713	268	RA	PAD	-0.647413	-1	-0.29898	0.419143	0.08939	1	0.000653912
638	4	37880861	38984838	1912	235	RA	PAD	0.106218	-0.24354	0.48902	0.0112822	0	0.24348	0.547809
915	5	166863414	168342743	1727	255	RA	PAD	0.272434	-0.09872	0.71207	0.0742202	0	0.50704	0.15309
952	6	27261036	28666364	1986	79	RA	PAD	-0.0988789	-0.35088	0.15085	0.00977704	0	0.12376	0.43762
1127	7	28890887	30175113	2138	233	RA	PAD	-0.118143	-0.579	0.31883	0.0139577	0	0.34185	0.574271
1264	8	19488889	20135628	1250	171	RA	PAD	0.20916	-0.24355	0.701	0.0437478	0	0.49144	0.335776
1307	8	72013185	72917489	1401	193	RA	PAD	-0.0154396	-0.36244	0.33464	0.000238382	0	0.1617	0.928094
1353	8	128073655	129291118	1898	262	RA	PAD	0.0521535	-0.23813	0.35483	0.00271999	0	0.13497	0.719747
1358	8	133461552	134509448	1665	212	RA	PAD	0.129339	-0.21293	0.46548	0.0167286	0	0.2184	0.43319
1381	9	8262304	9170120	1709	219	RA	PAD	0.311429	-0.06951	0.7497	0.0969883	0	0.56205	0.108348
1398	9	21674033	23091193	1968	208	RA	PAD	-0.158875	-0.50545	0.1707	0.0252412	0	0.25548	0.332072
1412	9	34704545	36749273	2210	237	RA	PAD	0.00513294	-0.38941	0.40363	2.63471e-05	0	0.21235	0.978282
1472	9	128785783	129617771	1124	197	RA	PAD	0.00914746	-0.41004	0.42945	8.3676e-05	0	0.23703	0.963372
1486	10	1329233	1872960	977	162	RA	PAD	-0.292743	-0.76589	0.11408	0.0856986	0	0.58659	0.153778
1544	10	62626466	64069687	1993	176	RA	PAD	-0.24417	-0.60914	0.09476	0.0596192	0	0.37105	0.159622
1603	10	129831970	130694008	1471	231	RA	PAD	-0.0126893	-0.40344	0.37927	0.000161017	0	0.207	0.945367
1613	11	2477450	3362508	861	186	RA	PAD	-0.340149	-0.87874	0.10144	0.115702	0	0.77219	0.121843
1733	11	128262551	129451784	983	189	RA	PAD	-0.371441	-0.73327	-0.0487	0.137969	0.00383	0.53769	0.0226703
1823	12	92061180	93487547	2055	199	RA	PAD	0.10183	-0.29113	0.52085	0.0103694	0	0.27951	0.596827
1841	12	111592382	113947983	2063	165	RA	PAD	0.847213	0.5393	1	0.71777	0.29084	1	3.44672e-06
1852	12	124843769	126079935	1855	264	RA	PAD	0.381671	0.06642	0.758	0.145673	0.00573	0.57456	0.0210515
1872	13	27392006	28587125	2060	218	RA	PAD	0.0184214	-0.39069	0.42879	0.000339348	0	0.22673	0.925444
1966	14	33591114	34695195	1480	291	RA	PAD	0.291126	-0.035	0.65391	0.0847542	0	0.4276	0.077946
2021	14	94892241	95946792	2027	278	RA	PAD	-0.133034	-0.55645	0.24969	0.0176981	0	0.3135	0.485446
2022	14	95946793	97174314	2020	234	RA	PAD	-0.177136	-0.54604	0.1595	0.0313771	0	0.29816	0.301805
2048	15	37962916	39238840	1687	207	RA	PAD	-0.0193123	-0.33223	0.30261	0.000372967	0	0.13105	0.900153
2093	15	93707011	94565521	1543	235	RA	PAD	0.0302551	-0.33836	0.4	0.000915369	0	0.18455	0.864692
2126	16	26154123	27443061	2006	267	RA	PAD	0.0257922	-0.35045	0.40738	0.000665236	0	0.19516	0.886727
2158	16	78280637	78973580	1816	247	RA	PAD	-0.133089	-0.54349	0.25405	0.0177126	0	0.30281	0.483431
2167	16	85146806	86058597	1001	226	RA	PAD	-0.339304	-0.69586	-0.01707	0.115127	0.00216	0.48422	0.039576
2175	17	1480057	2699135	1248	195	RA	PAD	0.114116	-0.28172	0.53747	0.0130225	0	0.29344	0.554488
2227	17	70495120	71466953	1280	242	RA	PAD	-0.249828	-0.69095	0.14469	0.0624138	0	0.47742	0.200641
2231	17	74908267	75619256	1202	184	RA	PAD	0.344748	-0.07195	0.85251	0.118851	0	0.72841	0.100164
2318	19	10028841	11681978	1991	218	RA	PAD	-0.529117	-0.86109	-0.26709	0.279965	0.07134	0.74148	0.000137521
2449	21	34383795	35729261	1640	224	RA	PAD	-0.241903	-0.55893	0.05891	0.0585173	0	0.3124	0.109577
2472	22	27192924	27952441	1364	259	RA	PAD	-0.159637	-0.55219	0.20771	0.0254838	0	0.30513	0.372906
2473	22	27952442	29457601	1609	186	RA	PAD	-0.472927	-0.98605	-0.07122	0.22366	0.00709	0.9723	0.0252934
16	1	14720132	15755230	1656	248	RA	Stroke	0.228756	-0.18449	0.6831	0.0523291	0	0.46734	0.257379
40	1	43512670	45167235	1856	194	RA	Stroke	-0.268752	-0.61724	0.05614	0.0722276	0	0.38098	0.102109
58	1	67761891	68633860	1138	152	RA	Stroke	-0.108311	-0.5323	0.28608	0.0117313	0	0.28962	0.579774
99	1	112489249	113418037	1064	157	RA	Stroke	0.145516	-0.29796	0.61841	0.021175	0	0.38617	0.494451
113	1	154685546	156813845	1632	204	RA	Stroke	0.0682384	-0.26021	0.38561	0.00465647	0	0.15506	0.666477
125	1	167163955	168179086	1273	173	RA	Stroke	0.0884493	-0.26319	0.44807	0.00782327	0	0.20572	0.607673
160	1	208162952	209711169	2024	269	RA	Stroke	0.131655	-0.20683	0.48915	0.0173331	0	0.24177	0.437852
268	2	60775067	62429910	1889	190	RA	Stroke	0.236194	-0.18202	0.6985	0.0557878	0	0.4879	0.251665
304	2	108417774	110097868	2100	172	RA	Stroke	-0.0518667	-0.47033	0.35228	0.00269016	0	0.24127	0.788546
374	2	191051955	193033982	2252	207	RA	Stroke	0.0668831	-0.25023	0.398	0.00447335	0	0.16401	0.671909
424	3	2140012	3128152	1704	269	RA	Stroke	0.25215	-0.11101	0.65448	0.0635795	0	0.42835	0.168906
431	3	8664893	9970731	1618	262	RA	Stroke	-0.0141493	-0.38277	0.35332	0.000200204	0	0.18112	0.935335
483	3	71223282	72334704	1428	258	RA	Stroke	0.630671	0.25453	1	0.397746	0.06481	1	0.00191132
584	3	186602046	187939199	1971	274	RA	Stroke	0.348062	0.07772	0.63681	0.121147	0.00634	0.40553	0.0132147
638	4	37880861	38984838	1986	244	RA	Stroke	-0.528778	-1	-0.11942	0.279607	0.01526	1	0.0133785
839	5	75959516	77290255	2017	234	RA	Stroke	-0.0357634	-0.45409	0.37146	0.00127902	0	0.24038	0.854318
888	5	132554691	134556570	2436	284	RA	Stroke	-0.069819	-0.38137	0.23031	0.0048747	0	0.14874	0.636277
907	5	157191082	158484775	1880	204	RA	Stroke	-0.102501	-0.51219	0.28239	0.0105064	0	0.26738	0.584203
908	5	158484776	159663733	1711	190	RA	Stroke	-0.0209983	-0.35644	0.31322	0.00044093	0	0.1532	0.899955
916	5	168342744	169506966	1975	231	RA	Stroke	0.293219	-0.14177	0.79969	0.0859772	0	0.63969	0.174677
918	5	170898341	172285682	1897	269	RA	Stroke	0.0737941	-0.32506	0.48917	0.00544557	0	0.25385	0.700332
920	5	173606996	174662885	1719	241	RA	Stroke	-0.0977888	-0.48135	0.26317	0.00956265	0	0.23997	0.583958
926	6	63979	1380679	1844	258	RA	Stroke	-0.179753	-0.45331	0.08384	0.0323111	0	0.20549	0.184068
948	6	23939307	24950379	1909	204	RA	Stroke	0.182716	-0.15253	0.54517	0.0333852	0	0.29761	0.29236
959	6	31250557	31320268	85	16	RA	Stroke	0.23333	-0.1588	0.64193	0.0544429	0	0.41289	0.224758
972	6	36346354	37570051	1956	225	RA	Stroke	0.0287245	-0.22667	0.27906	0.000825096	0	0.08859	0.823114
1067	6	143083348	144791455	2046	244	RA	Stroke	0.181871	-0.12205	0.50632	0.033077	0	0.25636	0.239427
1089	6	165835954	166853325	139	100	RA	Stroke	-0.00677201	-0.43377	0.4097	4.58601e-05	0	0.23139	0.972787
1090	6	166853326	167714865	187	115	RA	Stroke	0.138147	-0.19943	0.49393	0.0190847	0	0.24555	0.406675
1113	7	13676748	15013694	1970	240	RA	Stroke	0.146154	-0.24889	0.56761	0.0213611	0	0.32589	0.454554
1116	7	16739014	17596578	1368	238	RA	Stroke	0.311108	-0.02449	0.68063	0.0967879	0	0.46326	0.0706595
1125	7	25671576	27351286	2413	223	RA	Stroke	0.00850344	-0.38726	0.402	7.23085e-05	0	0.20837	0.964166
1126	7	27351287	28890886	2131	252	RA	Stroke	0.0677847	-0.21634	0.35777	0.00459476	0	0.13016	0.635716
1330	8	101448440	102548680	1348	186	RA	Stroke	0.192542	-0.18395	0.58956	0.0370724	0	0.34788	0.291545
1353	8	128073655	129291118	1954	272	RA	Stroke	0.0738689	-0.20677	0.36079	0.00545661	0	0.13182	0.594683
1398	9	21674033	23091193	1992	212	RA	Stroke	0.104752	-0.19846	0.41183	0.010973	0	0.17097	0.485607
1492	10	5396243	6234718	1564	225	RA	Stroke	0.174545	-0.11168	0.47344	0.0304659	0	0.22415	0.229957
1512	10	24489448	25577761	1295	204	RA	Stroke	-0.158429	-0.52111	0.18547	0.0250996	0	0.27163	0.357415
1544	10	62626466	64069687	2052	189	RA	Stroke	0.0160032	-0.33211	0.35959	0.000256101	0	0.16145	0.92411
1569	10	89971629	91021321	1596	195	RA	Stroke	0.332838	-0.08518	0.82519	0.110781	0	0.68095	0.11779
1573	10	94503300	95528160	1909	178	RA	Stroke	-0.239138	-0.63174	0.1121	0.0571869	0	0.3991	0.181758
1597	10	123856185	124894142	1740	211	RA	Stroke	-0.141345	-0.46773	0.17365	0.0199784	0	0.21928	0.375164
1601	10	127997709	129134738	1379	206	RA	Stroke	0.230087	-0.14507	0.61519	0.0529399	0	0.37958	0.210009
1678	11	69713997	71242834	2467	246	RA	Stroke	0.171799	-0.18662	0.56421	0.0295148	0	0.31855	0.332917
1724	11	118901214	120064528	1514	195	RA	Stroke	0.381783	-0.05355	0.91396	0.145758	0	0.83533	0.0813777
1735	11	130500784	131424361	156	105	RA	Stroke	0.38084	-0.07184	0.90007	0.145039	0	0.81012	0.0938836
1823	12	92061180	93487547	2107	205	RA	Stroke	-0.175709	-0.59689	0.20674	0.0308737	0	0.35811	0.358772
1841	12	111592382	113947983	2171	168	RA	Stroke	0.392919	0.00448	0.87291	0.154385	0.0022	0.76198	0.0525944
1844	12	115439452	116197675	1206	199	RA	Stroke	-0.341841	-0.84409	0.07604	0.116856	0	0.71249	0.105627
1874	13	30068526	31433218	2290	239	RA	Stroke	0.172156	-0.1234	0.48027	0.0296376	0	0.23066	0.237838
1883	13	40091624	41003943	1359	185	RA	Stroke	0.0977486	-0.25384	0.4594	0.00955479	0	0.2131	0.578532
1914	13	74437636	75882384	2197	215	RA	Stroke	-0.0635835	-0.51918	0.36973	0.00404286	0	0.29551	0.756047
1941	13	103050418	104378435	2327	224	RA	Stroke	0.0327788	-0.4012	0.4754	0.00107445	0	0.26179	0.873159
1945	13	107037865	108521978	2069	276	RA	Stroke	0.180428	-0.21788	0.62895	0.0325541	0	0.39935	0.36046
1958	14	23985937	24906056	1021	154	RA	Stroke	-0.44793	-0.93677	-0.05868	0.200641	0.00553	0.87754	0.0309981
1966	14	33591114	34695195	1525	298	RA	Stroke	0.417586	0.02471	0.92021	0.174378	0.00329	0.84684	0.0381955
1999	14	68976913	69794542	1354	197	RA	Stroke	-0.315013	-0.78081	0.07991	0.0992331	0	0.60967	0.115268
2011	14	82524786	84087372	2534	227	RA	Stroke	0.153747	-0.23768	0.57373	0.0236381	0	0.33096	0.420454
2019	14	92101229	93386328	2072	237	RA	Stroke	0.277367	-0.05535	0.6505	0.0769323	0	0.42315	0.112278
2021	14	94892241	95946792	2069	285	RA	Stroke	-0.279952	-0.62353	0.03203	0.0783729	0	0.38879	0.0836262
2023	14	97174315	98268391	1579	191	RA	Stroke	0.431675	-0.00336	0.9782	0.186343	0	0.95687	0.0533405
2072	15	69089816	70767983	2035	250	RA	Stroke	-0.239109	-0.54758	0.04484	0.0571732	0	0.29984	0.0997465
2093	15	93707011	94565521	1554	240	RA	Stroke	-0.188975	-0.60173	0.18519	0.0357115	0	0.36208	0.312117
2126	16	26154123	27443061	2043	275	RA	Stroke	0.0247524	-0.31749	0.36623	0.000612682	0	0.15727	0.880865
2150	16	72089512	73140781	1192	165	RA	Stroke	0.097088	-0.30847	0.52749	0.00942607	0	0.28551	0.62892
2158	16	78280637	78973580	1878	251	RA	Stroke	0.451982	0.03917	0.98407	0.204288	0.00442	0.9684	0.0349781
2167	16	85146806	86058597	1021	230	RA	Stroke	-0.0171651	-0.32663	0.28967	0.000294642	0	0.13226	0.90937
2168	16	86058598	86748867	1507	283	RA	Stroke	-0.377118	-0.76523	-0.03918	0.142218	0.00315	0.58558	0.0308409
2175	17	1480057	2699135	1279	199	RA	Stroke	0.000556326	-0.41767	0.42196	3.09499e-07	0	0.24049	0.997774
2177	17	3430441	4463971	1265	169	RA	Stroke	0.0285399	-0.32482	0.38007	0.000814524	0	0.17073	0.866852
2191	17	17326541	18900978	1306	106	RA	Stroke	0.401007	-0.02218	0.88264	0.160806	0	0.77905	0.0616239
2206	17	42348004	43460500	1218	140	RA	Stroke	0.0517999	-0.43068	0.53125	0.00268323	0	0.3314	0.815647
2210	17	47516225	48722590	1210	240	RA	Stroke	0.0145601	-0.36972	0.39556	0.000211995	0	0.19689	0.936537
2216	17	54950108	56245227	1456	253	RA	Stroke	-0.000265031	-0.39378	0.39364	7.02412e-08	0	0.20479	0.99886
2227	17	70495120	71466953	1289	245	RA	Stroke	0.198206	-0.20603	0.61698	0.0392858	0	0.38263	0.301702
2244	18	5575813	6756496	1527	248	RA	Stroke	-0.079639	-0.45944	0.28213	0.00634237	0	0.22146	0.654106
2262	18	28792735	30401128	2145	198	RA	Stroke	0.045955	-0.31606	0.41588	0.00211187	0	0.18852	0.794204
2293	18	65294196	66407960	2129	184	RA	Stroke	-0.138671	-0.55717	0.25599	0.0192297	0	0.31243	0.473315
2318	19	10028841	11681978	2020	225	RA	Stroke	-0.275095	-0.48912	-0.07441	0.0756774	0.00566	0.23923	0.0102168
2390	20	18959420	19957928	1640	208	RA	Stroke	0.183803	-0.19391	0.60069	0.0337835	0	0.36106	0.327478
2400	20	33890061	35990261	1661	149	RA	Stroke	0.00124656	-0.38707	0.36561	1.55391e-06	0	0.19365	0.994538
2449	21	34383795	35729261	1687	235	RA	Stroke	-0.0401314	-0.39947	0.3089	0.00161053	0	0.17363	0.815629
2472	22	27192924	27952441	1392	264	RA	Stroke	0.22545	-0.08432	0.53883	0.0508278	0	0.29034	0.148464
2473	22	27952442	29457601	1659	189	RA	Stroke	-0.330641	-0.76722	0.04255	0.109323	0	0.58863	0.085073
2483	22	38718590	40378783	1809	194	RA	Stroke	0.603499	0.28815	1	0.364211	0.08303	1	0.000378442
9	1	6136815	7711794	2116	232	SLE	AF	0.284272	-0.06319	0.66767	0.0808109	0	0.44578	0.113941
11	1	8580988	9475966	1055	187	SLE	AF	0.272678	-0.14594	0.74216	0.0743535	0	0.5508	0.188246
21	1	19238925	20556202	2156	202	SLE	AF	-0.167435	-0.57011	0.20135	0.0280345	0	0.32578	0.365748
24	1	22145630	22740287	1138	148	SLE	AF	0.0346032	-0.45068	0.4992	0.00119738	0	0.31371	0.875048
36	1	38474037	40200950	2216	223	SLE	AF	-0.28049	-0.78574	0.15626	0.0786745	0	0.61757	0.186182
38	1	41093876	41977966	1437	167	SLE	AF	-0.425939	-0.71766	-0.16041	0.181424	0.02573	0.51504	0.00244367
46	1	53114187	54771293	2339	207	SLE	AF	-0.0824365	-0.45348	0.27458	0.00679578	0	0.21144	0.634784
53	1	61377616	62778733	2046	249	SLE	AF	0.358549	-0.00302	0.76237	0.128557	0	0.58121	0.0482064
60	1	69438910	70992905	1975	197	SLE	AF	0.0981529	-0.33817	0.55306	0.00963399	0	0.32309	0.636945
79	1	90941550	91870059	1320	142	SLE	AF	-0.03299	-0.49059	0.40367	0.00108834	0	0.277	0.876438
95	1	107874654	109271449	1915	180	SLE	AF	0.113339	-0.24452	0.48374	0.0128457	0	0.23824	0.522891
98	1	111134063	112489248	2338	244	SLE	AF	0.0548122	-0.26358	0.3721	0.00300437	0	0.14355	0.71908
101	1	114664388	116207297	2421	213	SLE	AF	0.0844218	-0.23387	0.39935	0.00712704	0	0.16395	0.5886
113	1	154685546	156813845	1632	204	SLE	AF	0.172152	-0.06533	0.42269	0.0296363	0	0.17867	0.139967
118	1	161054077	161945442	1249	116	SLE	AF	-0.298293	-0.77597	0.11872	0.088979	0	0.60213	0.151159
119	1	161945443	163141862	1994	221	SLE	AF	0.0472572	-0.31217	0.40833	0.00223324	0	0.18816	0.783377
138	1	182420541	183920616	2222	156	SLE	AF	-0.257575	-0.54553	0.02094	0.066345	0	0.29761	0.0658873
156	1	202583885	204092537	1909	227	SLE	AF	0.00992245	-0.21286	0.23317	9.84549e-05	0	0.06541	0.930491
159	1	205917549	208162951	1772	194	SLE	AF	0.0403489	-0.33459	0.41493	0.00162803	0	0.19841	0.824009
179	1	230227248	231287764	2188	246	SLE	AF	0.328698	-0.0058	0.69833	0.108042	0	0.48767	0.0517676
232	2	29627933	30575619	1418	174	SLE	AF	0.0179645	-0.35387	0.3907	0.000322723	0	0.1897	0.920585
242	2	37603361	38887393	2010	224	SLE	AF	-0.0186895	-0.40307	0.36193	0.000349296	0	0.20105	0.919073
251	2	45850048	46499326	1113	237	SLE	AF	0.193665	-0.13287	0.54886	0.0375062	0	0.30287	0.237948
252	2	46499327	47320114	1528	214	SLE	AF	0.0882605	-0.33311	0.54647	0.00778991	0	0.30923	0.665571
267	2	59251997	60775066	2100	262	SLE	AF	0.056912	-0.29814	0.41199	0.00323898	0	0.18352	0.74145
268	2	60775067	62429910	1887	190	SLE	AF	0.222438	-0.12071	0.59081	0.0494787	0	0.34905	0.193084
271	2	64696090	65938002	1707	198	SLE	AF	-0.342363	-0.68956	-0.03444	0.117213	0.00238	0.47549	0.0287034
275	2	68877775	70756283	2385	218	SLE	AF	-0.0937686	-0.43058	0.23545	0.00879255	0	0.18733	0.564446
286	2	79900056	80737811	1117	200	SLE	AF	0.290154	-0.16129	0.81242	0.0841894	0	0.66002	0.19178
313	2	121073753	122026817	1255	179	SLE	AF	0.0553551	-0.27751	0.39601	0.00306419	0	0.16802	0.736717
326	2	134359060	135160197	1273	167	SLE	AF	0.41232	-0.01702	0.93634	0.170008	0	0.87673	0.0595946
335	2	144503689	145977920	1154	161	SLE	AF	0.210801	-0.19544	0.64239	0.0444372	0	0.41266	0.289303
338	2	149568876	151428988	2262	223	SLE	AF	0.0462967	-0.36512	0.45708	0.00214339	0	0.24027	0.812955
393	2	215899571	217566011	2103	251	SLE	AF	-0.157058	-0.45572	0.13752	0.0246671	0	0.20839	0.284897
412	2	235625790	236276287	1199	173	SLE	AF	0.180542	-0.28746	0.69801	0.0325954	0	0.49117	0.425797
426	3	4109394	4835083	1191	179	SLE	AF	-0.145962	-0.56557	0.25367	0.0213048	0	0.32449	0.454427
435	3	12859210	14312007	2193	255	SLE	AF	0.261844	-0.00585	0.54457	0.0685625	0	0.29656	0.0588493
457	3	36840137	38729767	2193	231	SLE	AF	-0.00588212	-0.34033	0.31587	3.45993e-05	0	0.14377	0.969886
458	3	38729768	39605996	1615	122	SLE	AF	0.164345	-0.1806	0.52907	0.0270093	0	0.28078	0.343193
470	3	56954879	58557718	2332	158	SLE	AF	0.0492388	-0.35294	0.44175	0.00242446	0	0.22204	0.792804
474	3	61277588	62609818	1663	256	SLE	AF	0.267201	-0.14621	0.7597	0.0713966	0	0.57715	0.205644
481	3	68319771	69784969	2337	225	SLE	AF	-0.153455	-0.56222	0.22057	0.0235483	0	0.31701	0.40861
483	3	71223282	72334704	1428	258	SLE	AF	0.472202	0.09508	0.9392	0.222975	0.0112	0.8821	0.0151308
484	3	72334705	73606612	1499	226	SLE	AF	0.531339	0.18782	0.95837	0.282321	0.03527	0.91848	0.00311139
539	3	133718494	135288394	2100	231	SLE	AF	-0.00361342	-0.39565	0.39109	1.30568e-05	0	0.21457	0.98464
573	3	172004761	173415591	1743	188	SLE	AF	-0.221789	-0.64325	0.1531	0.0491903	0	0.41377	0.240709
577	3	176931164	178110322	1494	198	SLE	AF	-0.128053	-0.62099	0.31367	0.0163975	0	0.39423	0.55426
581	3	183203156	184524268	1864	238	SLE	AF	-0.243374	-0.63085	0.11339	0.0592307	0	0.39797	0.176469
584	3	186602046	187939199	1968	273	SLE	AF	0.0435511	-0.28185	0.36714	0.0018967	0	0.15168	0.784475
603	4	5972710	7135819	1749	274	SLE	AF	0.145632	-0.24418	0.55743	0.0212087	0	0.31528	0.441132
638	4	37880861	38984838	1982	244	SLE	AF	-0.021499	-0.42723	0.3704	0.000462205	0	0.21023	0.910243
698	4	109978983	111733579	2257	212	SLE	AF	0.0830525	-0.08974	0.25465	0.00689772	0	0.06497	0.327732
785	5	9203856	10549029	1887	249	SLE	AF	0.434817	0.15767	0.75458	0.189066	0.02486	0.56938	0.0033037
804	5	31679465	32727914	1539	211	SLE	AF	-0.00410488	-0.32583	0.30835	1.685e-05	0	0.13342	0.978843
822	5	55221399	55968966	1259	201	SLE	AF	-0.191664	-0.64305	0.2326	0.0367351	0	0.41381	0.350073
841	5	79005159	80448225	2239	246	SLE	AF	-0.46334	-0.93072	-0.09465	0.214684	0.01006	0.86624	0.0166645
889	5	134556571	135344943	1230	141	SLE	AF	0.802499	0.42186	1	0.644004	0.17797	1	0.000190184
890	5	135344944	136949853	2128	210	SLE	AF	-0.249768	-0.54186	0.03222	0.0623838	0	0.29361	0.0749179
893	5	141253831	142532956	1750	217	SLE	AF	0.161616	-0.2673	0.64259	0.0261197	0	0.41983	0.446981
894	5	142532957	143605908	1460	165	SLE	AF	-0.311706	-0.67954	0.00246	0.0971607	0	0.46247	0.0557016
909	5	159663734	160519049	1437	179	SLE	AF	0.202881	-0.1412	0.57688	0.0411609	0	0.33279	0.237598
918	5	170898341	172285682	1894	269	SLE	AF	0.384848	0.08175	0.72932	0.148108	0.00723	0.5319	0.0145522
927	6	1380680	2746531	1933	232	SLE	AF	-0.514022	-1	-0.1429	0.264219	0.0205	1	0.00819428
928	6	2746532	3964072	1877	243	SLE	AF	-0.395899	-0.79948	-0.04617	0.156736	0.00465	0.63917	0.0268362
930	6	4657087	5378213	1214	144	SLE	AF	-0.198433	-0.73789	0.27821	0.0393757	0	0.55081	0.385192
932	6	6621938	7808323	2019	262	SLE	AF	0.176692	-0.11555	0.47678	0.0312202	0	0.22739	0.223882
938	6	15069422	16566882	2382	249	SLE	AF	0.101256	-0.16062	0.36707	0.0102528	0	0.13491	0.436131
939	6	16566883	17391994	1212	181	SLE	AF	0.347651	-0.04075	0.80512	0.120862	0	0.64992	0.0838365
961	6	31427210	32208901	589	105	SLE	AF	0.21931	0.00678	0.44777	0.0480968	0.00071	0.2005	0.0498057
967	6	32682214	32897998	319	54	SLE	AF	0.199318	-0.09736	0.50161	0.0397275	0	0.25162	0.178847
976	6	40778402	42103738	1906	246	SLE	AF	0.051368	-0.33287	0.44231	0.00263867	0	0.21872	0.784284
1026	6	93696826	95176337	2355	198	SLE	AF	0.296467	-0.10717	0.74954	0.0878927	0	0.5618	0.142817
1045	6	116132148	117674076	2313	170	SLE	AF	-0.255591	-0.73793	0.15556	0.0653267	0	0.54557	0.216321
1053	6	123854858	125365054	1938	235	SLE	AF	0.354401	-0.02548	0.78759	0.1256	0	0.6203	0.0663783
1057	6	129850179	130550137	1281	188	SLE	AF	0.117065	-0.22037	0.45972	0.0137043	0	0.21303	0.47686
1065	6	139716714	141449453	2038	182	SLE	AF	0.0980799	-0.31587	0.5188	0.00961967	0	0.27686	0.622278
1073	6	150635316	151629954	2058	232	SLE	AF	0.103229	-0.22869	0.43799	0.0106563	0	0.19726	0.532075
1078	6	154462011	155523957	1681	239	SLE	AF	0.295296	-0.00777	0.62382	0.0871994	0	0.38915	0.0549157
1087	6	163336362	164687462	2271	237	SLE	AF	0.102053	-0.23046	0.45438	0.0104147	0	0.20778	0.536587
1121	7	22165061	23106680	1643	173	SLE	AF	-0.193784	-0.66212	0.22273	0.0375522	0	0.44028	0.352975
1127	7	28890887	30175113	2175	241	SLE	AF	-0.0622953	-0.44972	0.3079	0.0038807	0	0.21382	0.729593
1166	7	73128831	75243899	781	106	SLE	AF	0.174383	-0.20606	0.5781	0.0304095	0	0.33641	0.357053
1179	7	90660832	92530165	1567	155	SLE	AF	0.329146	0.01787	0.65554	0.108337	0.00192	0.42973	0.0372295
1208	7	128779174	130418704	2146	211	SLE	AF	0.204483	-0.16619	0.61009	0.0418133	0	0.3722	0.270747
1214	7	137657460	138755107	1505	222	SLE	AF	-0.141179	-0.57273	0.25031	0.0199315	0	0.332	0.462767
1228	7	155280611	156344386	1131	211	SLE	AF	-0.0802968	-0.5151	0.33858	0.00644757	0	0.28117	0.690886
1241	8	4273084	4893120	1617	260	SLE	AF	-0.0179275	-0.42513	0.38288	0.000321396	0	0.22905	0.925339
1250	8	10478852	11466761	1691	195	SLE	AF	-0.142323	-0.49881	0.18697	0.0202557	0	0.25133	0.393501
1351	8	125453323	126766827	1831	219	SLE	AF	-0.482497	-1	-0.07436	0.232804	0.00735	1	0.0207539
1353	8	128073655	129291118	1954	272	SLE	AF	0.0960271	-0.18621	0.38406	0.00922121	0	0.14967	0.491918
1358	8	133461552	134509448	1697	218	SLE	AF	-0.00333178	-0.37971	0.36083	1.11008e-05	0	0.18124	0.985254
1381	9	8262304	9170120	1885	220	SLE	AF	0.0344442	-0.34344	0.41882	0.0011864	0	0.20455	0.849761
1412	9	34704545	36749273	2294	245	SLE	AF	0.211094	-0.13369	0.56091	0.0445606	0	0.31462	0.214433
1453	9	109150718	110630150	2072	259	SLE	AF	-0.0584759	-0.37428	0.24975	0.00341943	0	0.14651	0.700011
1472	9	128785783	129617771	1166	209	SLE	AF	-0.648839	-1	-0.32912	0.420991	0.10832	1	0.000287243
1475	9	132193799	132999452	1538	153	SLE	AF	0.443186	0.0288	0.95014	0.196414	0.00438	0.90277	0.039635
1476	9	132999453	134141936	1323	211	SLE	AF	0.181351	-0.24688	0.64756	0.0328883	0	0.42085	0.388078
1490	10	3880323	4813182	1521	203	SLE	AF	0.238628	-0.1421	0.65734	0.0569434	0	0.43287	0.211505
1492	10	5396243	6234718	1564	225	SLE	AF	0.412975	0.03756	0.85655	0.170548	0.00354	0.73368	0.0343446
1500	10	12581572	13208061	1088	185	SLE	AF	0.0717712	-0.36597	0.52461	0.0051511	0	0.3003	0.732339
1501	10	13208062	14008135	1353	245	SLE	AF	0.244427	-0.19148	0.73892	0.0597446	0	0.54643	0.248297
1532	10	49197321	50145673	1111	138	SLE	AF	-0.123337	-0.54227	0.26856	0.015212	0	0.29698	0.523862
1545	10	64069688	65400431	1999	150	SLE	AF	0.260254	-0.16979	0.75518	0.0677324	0	0.57106	0.217712
1552	10	71050505	71672997	1242	210	SLE	AF	-0.0217853	-0.30831	0.26021	0.000474599	0	0.10851	0.876801
1559	10	79952997	81190573	1915	277	SLE	AF	-0.088666	-0.40767	0.22444	0.00786166	0	0.17027	0.568792
1589	10	114255955	115588903	1628	225	SLE	AF	0.128076	-0.15733	0.42552	0.0164034	0	0.18135	0.372412
1656	11	43949378	45019559	1684	255	SLE	AF	0.11927	-0.18407	0.43499	0.0142254	0	0.18974	0.433194
1701	11	94384536	95327210	1186	160	SLE	AF	-0.390625	-0.82628	-0.02453	0.152588	0.00272	0.68274	0.0437164
1726	11	121208187	122589224	1719	204	SLE	AF	-0.212091	-0.64282	0.182	0.0449824	0	0.41414	0.278097
1733	11	128262551	129451784	1005	197	SLE	AF	-0.173654	-0.41584	0.06334	0.0301558	0	0.17292	0.153124
1740	12	60317	1078397	1184	178	SLE	AF	-0.0929627	-0.52468	0.32971	0.00864207	0	0.29232	0.648197
1743	12	3069507	3871114	1397	224	SLE	AF	-0.028047	-0.41392	0.35627	0.000786636	0	0.20616	0.879817
1744	12	3871115	4967643	1383	231	SLE	AF	-0.0517354	-0.40944	0.30156	0.00267655	0	0.17989	0.760342
1747	12	6948955	8123317	1441	160	SLE	AF	0.152391	-0.26627	0.60943	0.023223	0	0.37157	0.459226
1764	12	23923799	25058714	1814	239	SLE	AF	0.277971	0.07912	0.4788	0.077268	0.00635	0.22925	0.00595292
1810	12	75563969	76524573	1242	160	SLE	AF	-0.344403	-0.82344	0.06068	0.118613	0	0.67806	0.0893145
1844	12	115439452	116197675	1206	199	SLE	AF	0.152832	-0.20463	0.5328	0.0233576	0	0.28589	0.37996
1845	12	116197676	117091843	1282	196	SLE	AF	0.131973	-0.25078	0.53931	0.017417	0	0.29115	0.47816
1848	12	119301062	120567740	1701	196	SLE	AF	-0.282501	-0.62515	0.03503	0.0798066	0	0.39081	0.082015
1852	12	124843769	126079935	1911	268	SLE	AF	0.0414177	-0.36389	0.45528	0.00171542	0	0.24173	0.832201
1866	13	21540734	22795188	1684	230	SLE	AF	-0.245823	-0.64646	0.10732	0.0604289	0	0.41791	0.167994
1867	13	22795189	23729049	1959	239	SLE	AF	-0.511052	-1	-0.07211	0.261174	0.00814	1	0.0224919
1937	13	98527336	99402294	1347	186	SLE	AF	-0.147832	-0.50011	0.18346	0.0218542	0	0.25011	0.376051
1948	13	109813577	110995432	2102	248	SLE	AF	-0.17503	-0.50859	0.13833	0.0306353	0	0.25866	0.265017
1955	14	20876081	21982654	1455	266	SLE	AF	-0.186409	-0.5305	0.13821	0.0347485	0	0.28143	0.24063
1957	14	22760701	23985936	1512	237	SLE	AF	-0.0235702	-0.27768	0.22043	0.000555553	0	0.08541	0.850056
1958	14	23985937	24906056	1021	154	SLE	AF	-0.0948166	-0.52933	0.33114	0.00899018	0	0.28861	0.640417
1963	14	29029225	30831154	1858	222	SLE	AF	-0.0689992	-0.41696	0.26457	0.00476089	0	0.17949	0.676324
1965	14	32382246	33591113	1629	232	SLE	AF	0.104195	-0.17534	0.38639	0.0108565	0	0.15074	0.45046
1986	14	54359599	55292832	1122	142	SLE	AF	-0.261076	-0.72139	0.14727	0.0681606	0	0.5204	0.197483
1999	14	68976913	69794542	1352	197	SLE	AF	-0.388839	-0.80795	-0.02704	0.151196	0.00285	0.65278	0.0382936
2002	14	72665320	73373373	1182	171	SLE	AF	-0.287417	-0.63939	0.04837	0.0826085	0	0.40882	0.0927405
2009	14	79199452	81001920	2193	222	SLE	AF	-0.458315	-0.95376	-0.06769	0.210053	0.00682	0.90967	0.0235183
2017	14	89482884	90662836	1542	202	SLE	AF	-0.2736	-0.7895	0.16291	0.0748572	0	0.62331	0.203748
2019	14	92101229	93386328	2071	236	SLE	AF	0.364542	-0.03721	0.85341	0.132891	0	0.7283	0.0796295
2021	14	94892241	95946792	2068	285	SLE	AF	-0.627429	-1	-0.27347	0.393668	0.07478	1	0.000741789
2022	14	95946793	97174314	2064	242	SLE	AF	-0.270991	-0.65208	0.08063	0.0734362	0	0.42521	0.119102
2023	14	97174315	98268391	1577	191	SLE	AF	-0.632959	-1	-0.26676	0.400638	0.07116	1	0.00163555
2038	15	25384328	26392947	1751	249	SLE	AF	0.352471	0.03378	0.70902	0.124236	0.00278	0.50271	0.0322726
2046	15	35118928	36583327	1937	200	SLE	AF	-0.0653127	-0.49951	0.352	0.00426575	0	0.27029	0.743208
2047	15	36583328	37962915	1979	237	SLE	AF	0.0957845	-0.27389	0.47075	0.00917467	0	0.22649	0.587602
2055	15	47693317	49260006	1579	160	SLE	AF	0.071993	-0.32606	0.46111	0.00518299	0	0.22705	0.699525
2063	15	57641165	58712954	1672	247	SLE	AF	0.218416	-0.09567	0.55115	0.0477057	0	0.30376	0.166371
2068	15	63218979	64339945	1847	179	SLE	AF	-0.228466	-0.69819	0.18562	0.0521965	0	0.48958	0.264676
2072	15	69089816	70767983	2033	250	SLE	AF	-0.050029	-0.31884	0.21078	0.0025029	0	0.10647	0.703142
2076	15	74458114	76401952	1855	163	SLE	AF	-0.880936	-1	-0.51382	0.776048	0.26401	1	4.26128e-05
2089	15	89385188	90632718	1509	181	SLE	AF	0.0359543	-0.42734	0.5042	0.00129271	0	0.30057	0.867272
2093	15	93707011	94565521	1553	240	SLE	AF	-0.315967	-0.75703	0.0632	0.0998352	0	0.57407	0.104686
2095	15	95662426	96864278	1538	232	SLE	AF	-0.256117	-0.61471	0.07504	0.0655957	0	0.37786	0.125006
2105	16	3379997	4816145	1666	201	SLE	AF	-0.0446584	-0.46232	0.35694	0.00199437	0	0.2345	0.816886
2107	16	5782969	6446081	1158	230	SLE	AF	-0.337664	-0.81848	0.0582	0.114017	0	0.66992	0.0954481
2127	16	27443062	29043177	1040	156	SLE	AF	-0.184678	-0.63157	0.22134	0.034106	0	0.40162	0.367528
2162	16	81437862	82310204	1581	245	SLE	AF	-0.155556	-0.56353	0.22833	0.0241977	0	0.31793	0.402354
2165	16	83778372	84440154	1679	269	SLE	AF	-0.178575	-0.51105	0.12919	0.0318889	0	0.26117	0.250576
2179	17	5573785	6305078	1325	202	SLE	AF	0.263775	-0.11044	0.68535	0.0695773	0	0.46971	0.15857
2181	17	7264459	8554763	1590	186	SLE	AF	-0.229468	-0.67019	0.16421	0.0526557	0	0.44916	0.245424
2186	17	12676354	13648446	1873	231	SLE	AF	-0.615407	-1	-0.30918	0.378726	0.09559	1	0.000222778
2188	17	14508611	15308722	1715	209	SLE	AF	-0.12995	-0.46537	0.19304	0.0168871	0	0.2166	0.417935
2202	17	36116885	37361178	966	161	SLE	AF	-0.141742	-0.52171	0.22623	0.0200908	0	0.27499	0.427704
2209	17	45883902	47516224	2395	193	SLE	AF	-0.105973	-0.53737	0.28186	0.0112302	0	0.29252	0.58351
2216	17	54950108	56245227	1455	253	SLE	AF	-0.329278	-0.66998	-0.01934	0.108424	0.0017	0.44887	0.03753
2222	17	64438388	65582327	1685	235	SLE	AF	0.177092	-0.16628	0.55312	0.0313617	0	0.30595	0.29878
2223	17	65582328	66757556	1509	173	SLE	AF	-0.0744828	-0.49492	0.32315	0.00554769	0	0.26259	0.704495
2227	17	70495120	71466953	1287	245	SLE	AF	0.195515	-0.15739	0.56615	0.0382263	0	0.32052	0.271884
2228	17	71466954	72383472	1357	248	SLE	AF	0.239086	-0.16421	0.69345	0.0571622	0	0.48116	0.228406
2245	18	6756497	7862479	1438	208	SLE	AF	-0.191693	-0.5379	0.13536	0.0367464	0	0.28933	0.241522
2246	18	7862480	8788524	1569	198	SLE	AF	0.195539	-0.14231	0.55454	0.0382356	0	0.30751	0.242601
2262	18	28792735	30401128	2145	198	SLE	AF	0.116961	-0.23207	0.46864	0.0136799	0	0.2211	0.486012
2272	18	42974166	44300145	1910	245	SLE	AF	0.147415	-0.19116	0.52251	0.0217311	0	0.27305	0.393812
2274	18	45718493	46558306	1309	237	SLE	AF	-0.151496	-0.45769	0.14225	0.0229512	0	0.20982	0.301247
2276	18	47455926	48228379	1234	165	SLE	AF	0.221793	-0.20874	0.69224	0.049192	0	0.4792	0.29003
2277	18	48228380	49790996	1845	218	SLE	AF	0.313397	-0.1241	0.82945	0.098218	0	0.68805	0.156146
2284	18	55809316	56832312	1591	210	SLE	AF	0.279358	-0.07486	0.66156	0.0780408	0	0.43766	0.115805
2287	18	58527237	59449422	1174	165	SLE	AF	0.551245	0.13772	1	0.303871	0.01979	1	0.0129799
2310	19	3085447	3893909	854	150	SLE	AF	0.163321	-0.24549	0.60082	0.0266738	0	0.36256	0.420765
2318	19	10028841	11681978	2015	224	SLE	AF	0.0126752	-0.34006	0.37171	0.000160661	0	0.16852	0.94125
2336	19	29389091	30375792	1801	208	SLE	AF	-0.225264	-0.64015	0.15006	0.0507438	0	0.40979	0.226629
2355	19	48573066	49415189	1248	139	SLE	AF	-0.0367047	-0.40837	0.32724	0.00134723	0	0.18765	0.836274
2357	19	50451926	51259178	849	148	SLE	AF	-0.054143	-0.37494	0.27454	0.00293146	0	0.15335	0.733105
2370	20	884242	1771285	1402	210	SLE	AF	0.0637919	-0.29519	0.44738	0.0040694	0	0.21184	0.724153
2373	20	3736552	4591847	1460	197	SLE	AF	-0.0762917	-0.46151	0.30016	0.00582043	0	0.22283	0.67395
2376	20	6128359	7231796	1457	174	SLE	AF	-0.304973	-0.67271	0.02746	0.0930088	0	0.45255	0.0751702
2449	21	34383795	35729261	1687	235	SLE	AF	-0.333058	-0.71299	-0.00094	0.110927	0.00139	0.50835	0.052821
2450	21	35729262	37303548	2177	238	SLE	AF	0.216133	-0.06068	0.5283	0.0467135	0	0.27911	0.122657
2464	22	18535226	19635654	1209	147	SLE	AF	-0.175321	-0.64026	0.27055	0.0307376	0	0.41067	0.404001
2471	22	26166935	27192923	1677	238	SLE	AF	-0.231778	-0.60209	0.10595	0.0537212	0	0.36251	0.176121
2472	22	27192924	27952441	1391	264	SLE	AF	0.166043	-0.25853	0.62037	0.0275703	0	0.38808	0.416049
2482	22	37364005	38718589	1759	225	SLE	AF	0.387797	-0.02033	0.88112	0.150386	0	0.77637	0.0598244
2483	22	38718590	40378783	1809	194	SLE	AF	0.084653	-0.28839	0.46836	0.00716614	0	0.22711	0.64308
2488	22	44409534	45170649	1321	240	SLE	AF	-0.202388	-0.54725	0.12054	0.0409608	0	0.29981	0.206383
4	1	2983520	3582047	812	155	SLE	CAD	-0.0461226	-0.37494	0.2874	0.0021273	0	0.15179	0.775017
11	1	8580988	9475966	1055	187	SLE	CAD	0.439993	0.06421	0.89507	0.193594	0.00648	0.80115	0.0250372
21	1	19238925	20556202	2156	202	SLE	CAD	-0.343972	-0.72848	0.00044	0.118317	0	0.53068	0.0481187
24	1	22145630	22740287	1138	148	SLE	CAD	0.594316	0.2203	1	0.353211	0.04853	1	0.00281729
35	1	36855140	38474036	2206	229	SLE	CAD	-0.245928	-0.59447	0.07603	0.0604805	0	0.3534	0.1304
36	1	38474037	40200950	2216	223	SLE	CAD	0.371333	0.00648	0.7861	0.137888	0.00219	0.61795	0.0414508
38	1	41093876	41977966	1437	167	SLE	CAD	-0.540172	-0.95499	-0.20119	0.291786	0.04065	0.912	0.00299109
48	1	55727135	56799636	1814	164	SLE	CAD	0.159312	-0.26032	0.60046	0.0253804	0	0.36256	0.437637
98	1	111134063	112489248	2339	244	SLE	CAD	-0.451867	-0.91984	-0.07081	0.204184	0.00686	0.8461	0.0220177
100	1	113418038	114664387	1303	141	SLE	CAD	0.734912	0.41874	1	0.540096	0.17534	1	7.42969e-05
101	1	114664388	116207297	2423	213	SLE	CAD	0.0563913	-0.21937	0.33063	0.00317998	0	0.11338	0.67975
110	1	151146408	152535630	1294	123	SLE	CAD	0.115493	-0.26207	0.51664	0.0133387	0	0.27053	0.534208
113	1	154685546	156813845	1632	204	SLE	CAD	-0.0953414	-0.52389	0.3158	0.00908999	0	0.28418	0.629784
114	1	156813846	158081627	1891	195	SLE	CAD	-0.490889	-0.9369	-0.14362	0.240972	0.02076	0.87779	0.00689991
155	1	201067953	202583884	2064	270	SLE	CAD	0.130376	-0.16553	0.43216	0.0169979	0	0.18686	0.378571
156	1	202583885	204092537	1909	227	SLE	CAD	-0.187889	-0.56115	0.1382	0.0353021	0	0.31488	0.269553
159	1	205917549	208162951	1773	194	SLE	CAD	-0.119735	-0.46477	0.21936	0.0143364	0	0.21888	0.46747
160	1	208162952	209711169	2024	269	SLE	CAD	-0.546229	-1	-0.1626	0.298366	0.02653	1	0.00634789
179	1	230227248	231287764	2192	247	SLE	CAD	0.210554	-0.15039	0.57314	0.0443332	0	0.32866	0.231212
184	1	234365797	235097113	1219	198	SLE	CAD	-0.129687	-0.51201	0.21575	0.0168187	0	0.26292	0.457085
205	2	2680064	3314202	990	170	SLE	CAD	-0.0949051	-0.55537	0.3256	0.00900697	0	0.32142	0.644949
221	2	15721704	17241115	2137	250	SLE	CAD	0.083016	-0.27289	0.44317	0.00689166	0	0.20391	0.634819
232	2	29627933	30575619	1423	174	SLE	CAD	-0.321849	-0.66765	0.00027	0.103587	0	0.44575	0.0466562
242	2	37603361	38887393	2013	225	SLE	CAD	-0.0717719	-0.43855	0.28649	0.0051512	0	0.19991	0.680189
251	2	45850048	46499326	1113	237	SLE	CAD	-0.381629	-0.73843	-0.07325	0.145641	0.00598	0.54528	0.0159848
267	2	59251997	60775066	2101	262	SLE	CAD	-0.122362	-0.46581	0.19568	0.0149724	0	0.21698	0.440025
271	2	64696090	65938002	1710	199	SLE	CAD	0.131739	-0.22738	0.49247	0.0173551	0	0.24519	0.447076
275	2	68877775	70756283	2385	218	SLE	CAD	-0.33586	-0.77966	0.04794	0.112802	0	0.60788	0.0853448
290	2	84395900	85992794	2191	192	SLE	CAD	-0.0404512	-0.3236	0.234	0.0016363	0	0.1142	0.768751
335	2	144503689	145977920	1155	161	SLE	CAD	0.294327	-0.01825	0.63242	0.0866284	0	0.39995	0.063534
355	2	170865766	171566482	1187	174	SLE	CAD	0.475327	0.0952	0.92535	0.225936	0.01054	0.85628	0.016334
393	2	215899571	217566011	2108	252	SLE	CAD	0.078895	-0.19108	0.35203	0.00622442	0	0.12523	0.560947
440	3	19030989	20754842	2605	200	SLE	CAD	-0.0975384	-0.52331	0.30662	0.00951374	0	0.28078	0.61367
441	3	20754843	21790867	2052	213	SLE	CAD	0.246975	-0.1837	0.73411	0.0609967	0	0.54052	0.238002
463	3	45844192	47588461	2297	159	SLE	CAD	0.14889	-0.26876	0.59868	0.0221683	0	0.36251	0.465361
464	3	47588462	50387742	1514	114	SLE	CAD	-0.0963801	-0.45802	0.26198	0.00928913	0	0.21382	0.583113
472	3	59998584	60571139	1236	191	SLE	CAD	-0.484809	-0.96389	-0.08894	0.23504	0.00994	0.92908	0.0173903
475	3	62609819	63670803	1950	178	SLE	CAD	0.158276	-0.19539	0.50954	0.0250513	0	0.26128	0.354247
483	3	71223282	72334704	1428	258	SLE	CAD	0.279179	-0.09415	0.68791	0.0779407	0	0.47382	0.134918
484	3	72334705	73606612	1501	227	SLE	CAD	-0.12865	-0.57485	0.28536	0.0165507	0	0.33685	0.529136
539	3	133718494	135288394	2105	231	SLE	CAD	-0.0654697	-0.38504	0.24815	0.00428628	0	0.15244	0.678886
551	3	148638309	149998411	2214	224	SLE	CAD	0.174351	-0.17456	0.53223	0.0303984	0	0.28327	0.304389
558	3	156795411	157633700	1326	111	SLE	CAD	-0.504326	-1	-0.06267	0.254344	0.00682	1	0.0283872
573	3	172004761	173415591	1743	188	SLE	CAD	-0.333173	-0.73975	0.02396	0.111004	0	0.54723	0.064615
583	3	185709997	186602045	1057	195	SLE	CAD	0.370129	0.01232	0.80192	0.136995	0.00201	0.64308	0.0495984
584	3	186602046	187939199	1971	274	SLE	CAD	0.0481792	-0.29051	0.40384	0.00232123	0	0.17226	0.771184
638	4	37880861	38984838	1986	244	SLE	CAD	-0.286809	-0.6236	0.01748	0.0822592	0	0.38888	0.0758143
653	4	57103101	58011085	1593	166	SLE	CAD	0.0284928	-0.42676	0.47861	0.000811838	0	0.27289	0.892748
689	4	99532481	100333334	1518	107	SLE	CAD	0.082627	-0.2697	0.44385	0.00682722	0	0.20154	0.633902
692	4	102544804	104384534	2243	175	SLE	CAD	0.524446	0.1395	1	0.275044	0.01979	1	0.00834267
725	4	137400032	138537344	2348	175	SLE	CAD	-0.563465	-1	-0.14856	0.317493	0.02213	1	0.00885428
727	4	139553761	141087047	1703	225	SLE	CAD	0.120531	-0.24557	0.51277	0.0145278	0	0.26681	0.507871
738	4	155044410	156520288	1939	182	SLE	CAD	-0.405164	-0.72804	-0.11662	0.164158	0.01378	0.53005	0.00741715
739	4	156520289	157597309	2358	189	SLE	CAD	0.0121031	-0.35756	0.38652	0.000146484	0	0.1869	0.946374
766	4	182946259	183603892	1105	196	SLE	CAD	0.516312	0.18077	0.94207	0.266578	0.033	0.8875	0.00517921
777	5	1206610	2106885	1602	221	SLE	CAD	-0.333926	-0.76248	0.04246	0.111506	0	0.58138	0.0795582
781	5	4636543	5828694	2097	239	SLE	CAD	0.169875	-0.18446	0.55118	0.0288574	0	0.30445	0.329572
782	5	5828695	6936733	2331	245	SLE	CAD	0.155585	-0.15225	0.48121	0.0242067	0	0.23158	0.323382
785	5	9203856	10549029	1889	250	SLE	CAD	0.0887505	-0.25161	0.44385	0.00787665	0	0.2038	0.594543
806	5	33971057	35157146	1678	159	SLE	CAD	0.443357	0.02609	0.96766	0.196565	0.0047	0.93636	0.0399444
809	5	37925488	39438985	1977	197	SLE	CAD	0.173359	-0.2538	0.63767	0.0300534	0	0.41113	0.408755
822	5	55221399	55968966	1260	201	SLE	CAD	-0.0832238	-0.42598	0.24456	0.0069262	0	0.1879	0.60361
881	5	124109486	125131720	1633	213	SLE	CAD	-0.0574022	-0.47788	0.34482	0.00329502	0	0.24814	0.767389
888	5	132554691	134556570	2436	284	SLE	CAD	0.0224388	-0.33702	0.37201	0.000503498	0	0.17295	0.894398
893	5	141253831	142532956	1755	217	SLE	CAD	-0.178125	-0.55816	0.18468	0.0317284	0	0.31163	0.316527
894	5	142532957	143605908	1460	165	SLE	CAD	-0.205736	-0.63318	0.18299	0.0423273	0	0.40151	0.286666
898	5	148662215	149850203	1522	231	SLE	CAD	0.127844	-0.16924	0.43158	0.0163441	0	0.18661	0.39009
914	5	165289212	166863413	1744	249	SLE	CAD	-0.203722	-0.60371	0.15515	0.0415025	0	0.36496	0.257204
921	5	174662886	176180301	1524	215	SLE	CAD	-0.21075	-0.62692	0.16164	0.0444154	0	0.39317	0.263244
926	6	63979	1380679	1844	258	SLE	CAD	-0.221574	-0.53353	0.06237	0.0490951	0	0.28465	0.131037
927	6	1380680	2746531	1934	232	SLE	CAD	0.123946	-0.18311	0.44658	0.0153625	0	0.20218	0.421789
938	6	15069422	16566882	2384	249	SLE	CAD	-0.00317048	-0.33305	0.31133	1.00519e-05	0	0.13935	0.983907
948	6	23939307	24950379	1909	204	SLE	CAD	0.0516076	-0.3828	0.47989	0.00266334	0	0.25735	0.800409
952	6	27261036	28666364	2015	83	SLE	CAD	-0.114744	-0.41921	0.1799	0.0131663	0	0.17694	0.437783
953	6	28666365	29529755	199	47	SLE	CAD	-0.392233	-0.72664	-0.08485	0.153847	0.00788	0.528	0.0153863
957	6	30715007	31106493	251	61	SLE	CAD	-0.216279	-0.53206	0.07253	0.0467765	0	0.28309	0.138297
958	6	31106494	31250556	185	34	SLE	CAD	-0.284859	-0.55893	-0.0254	0.0811444	0.00156	0.31241	0.0354275
959	6	31250557	31320268	85	16	SLE	CAD	-0.0377235	-0.3944	0.32523	0.00142306	0	0.17412	0.827455
960	6	31320269	31427209	243	36	SLE	CAD	-0.112668	-0.37188	0.15344	0.0126941	0	0.13859	0.386302
961	6	31427210	32208901	589	105	SLE	CAD	-0.0605802	-0.27205	0.14677	0.00366997	0	0.07455	0.565175
964	6	32539568	32586784	40	10	SLE	CAD	-0.23425	-0.56169	0.09455	0.0548729	0	0.31549	0.164523
965	6	32586785	32629239	29	13	SLE	CAD	-0.183828	-0.50757	0.14183	0.0337927	0	0.25763	0.257466
969	6	33194976	33864262	1104	143	SLE	CAD	0.0624832	-0.31419	0.44721	0.00390415	0	0.2182	0.73019
970	6	33864263	34979270	1570	143	SLE	CAD	-0.16208	-0.51202	0.16575	0.0262701	0	0.26216	0.331397
971	6	34979271	36346353	1735	176	SLE	CAD	-0.0211996	-0.36029	0.30902	0.000449423	0	0.15302	0.896654
974	6	38688721	39785907	2007	203	SLE	CAD	-0.583005	-1	-0.23236	0.339895	0.05399	1	0.00185767
976	6	40778402	42103738	1910	246	SLE	CAD	0.117084	-0.26775	0.51684	0.0137088	0	0.27457	0.534459
1022	6	89974268	91097024	1307	173	SLE	CAD	0.0721003	-0.33481	0.48437	0.00519846	0	0.252	0.712704
1038	6	107309328	109043244	1897	181	SLE	CAD	-0.0182311	-0.45934	0.43267	0.000332372	0	0.26693	0.92908
1054	6	125365055	127545459	1946	192	SLE	CAD	-0.215503	-0.65096	0.1764	0.0464416	0	0.42375	0.261413
1057	6	129850179	130550137	1281	188	SLE	CAD	-0.0739178	-0.48747	0.31441	0.00546384	0	0.25046	0.697251
1065	6	139716714	141449453	2038	182	SLE	CAD	-0.24793	-0.74392	0.19183	0.0614691	0	0.55353	0.247635
1071	6	148184845	149278798	2028	249	SLE	CAD	-0.0203307	-0.34039	0.29465	0.000413337	0	0.13515	0.896318
1073	6	150635316	151629954	2059	233	SLE	CAD	-0.00732518	-0.31857	0.31435	5.36583e-05	0	0.13775	0.962471
1078	6	154462011	155523957	1685	240	SLE	CAD	0.651222	0.2756	1	0.42409	0.07595	1	0.00130681
1079	6	155523958	156762740	2060	235	SLE	CAD	-0.239597	-0.71407	0.1817	0.0574066	0	0.51203	0.244581
1087	6	163336362	164687462	2271	237	SLE	CAD	0.00904318	-0.31344	0.32469	8.17792e-05	0	0.13642	0.953745
1121	7	22165061	23106680	1643	173	SLE	CAD	0.218329	-0.23392	0.73292	0.0476676	0	0.53814	0.321775
1127	7	28890887	30175113	2175	241	SLE	CAD	-0.112427	-0.48675	0.23584	0.0126398	0	0.23852	0.51344
1132	7	34114533	35354135	2054	146	SLE	CAD	0.0536827	-0.39309	0.50798	0.00288184	0	0.29441	0.801751
1140	7	43448816	44989571	1801	174	SLE	CAD	0.148649	-0.18838	0.52697	0.0220964	0	0.27826	0.380827
1169	7	77663965	78685009	2056	218	SLE	CAD	-0.0330615	-0.47651	0.39853	0.00109306	0	0.26359	0.872364
1208	7	128779174	130418704	2149	212	SLE	CAD	0.535279	0.22508	0.88782	0.286524	0.05066	0.78822	0.00118339
1209	7	130418705	131856481	1917	246	SLE	CAD	0.360674	0.0817	0.66851	0.130086	0.00722	0.4469	0.0135812
1214	7	137657460	138755107	1506	222	SLE	CAD	0.0889577	-0.25591	0.44141	0.00791347	0	0.20181	0.596624
1227	7	154407488	155280610	1639	227	SLE	CAD	-0.168469	-0.56344	0.19889	0.0283816	0	0.31929	0.357483
1235	8	1628040	2070902	796	207	SLE	CAD	0.172369	-0.20129	0.57761	0.029711	0	0.33409	0.349574
1242	8	4893121	5566269	2010	221	SLE	CAD	0.0609862	-0.33597	0.46357	0.00371931	0	0.23423	0.751508
1244	8	6019164	6663427	1639	217	SLE	CAD	-0.348742	-0.70948	-0.02659	0.121621	0.00198	0.50336	0.0348095
1309	8	73838028	75011699	1728	193	SLE	CAD	0.137924	-0.28688	0.5801	0.0190231	0	0.33916	0.494764
1324	8	92876621	94999066	2055	236	SLE	CAD	-0.109183	-0.5805	0.32924	0.0119209	0	0.34841	0.607666
1351	8	125453323	126766827	1831	219	SLE	CAD	-0.366947	-0.68049	-0.0936	0.13465	0.00917	0.46307	0.0105964
1353	8	128073655	129291118	1954	272	SLE	CAD	-0.0830508	-0.38668	0.20684	0.00689744	0	0.152	0.56902
1424	9	78630916	79451035	1381	216	SLE	CAD	-0.0720573	-0.52148	0.36746	0.00519225	0	0.29659	0.723448
1427	9	81161598	82601465	1682	250	SLE	CAD	0.160683	-0.15481	0.50216	0.0258189	0	0.25259	0.315212
1453	9	109150718	110630150	2077	260	SLE	CAD	-0.0327078	-0.27939	0.22263	0.0010698	0	0.088	0.793561
1457	9	112865521	113646149	1333	194	SLE	CAD	0.343631	-0.09244	0.84062	0.118083	0	0.70664	0.113974
1464	9	119001228	119890464	1304	181	SLE	CAD	0.133393	-0.27878	0.56099	0.0177937	0	0.32373	0.506344
1490	10	3880323	4813182	1521	203	SLE	CAD	-0.0290014	-0.41063	0.3552	0.000841083	0	0.20141	0.877131
1502	10	14008136	14820755	1645	209	SLE	CAD	-0.229721	-0.56665	0.07629	0.0527719	0	0.32109	0.130422
1505	10	17065861	18529742	2099	202	SLE	CAD	-0.20141	-0.5753	0.15694	0.0405662	0	0.33097	0.254391
1544	10	62626466	64069687	2052	189	SLE	CAD	0.166358	-0.1229	0.46435	0.0276749	0	0.21562	0.252163
1545	10	64069688	65400431	2000	150	SLE	CAD	0.12155	-0.33516	0.60299	0.0147744	0	0.37643	0.582901
1553	10	71672998	72659223	1954	236	SLE	CAD	-0.321037	-0.77838	0.06482	0.103065	0	0.60588	0.0980603
1554	10	72659224	73514214	1537	239	SLE	CAD	0.0658623	-0.28142	0.42018	0.00433784	0	0.18588	0.702275
1559	10	79952997	81190573	1919	277	SLE	CAD	-0.102448	-0.42063	0.1981	0.0104955	0	0.17774	0.49508
1589	10	114255955	115588903	1637	225	SLE	CAD	-0.241949	-0.59078	0.08178	0.0585395	0	0.34902	0.140132
1603	10	129831970	130694008	1494	237	SLE	CAD	-0.200827	-0.57741	0.13798	0.0403316	0	0.33341	0.243022
1610	11	87150	1061399	1172	147	SLE	CAD	-0.0916321	-0.37515	0.19205	0.00839644	0	0.1414	0.517903
1620	11	7915072	9080939	1908	208	SLE	CAD	0.119135	-0.28368	0.56137	0.0141932	0	0.32005	0.550286
1624	11	11632651	12470449	1512	230	SLE	CAD	0.0656568	-0.29517	0.43635	0.00431082	0	0.20474	0.710205
1656	11	43949378	45019559	1685	255	SLE	CAD	-0.15914	-0.50413	0.17082	0.0253255	0	0.2547	0.329696
1671	11	60515106	61717117	1150	159	SLE	CAD	0.580881	0.23697	1	0.337423	0.05616	1	0.00194338
1674	11	64594823	66782661	2041	190	SLE	CAD	-0.0473558	-0.33745	0.23802	0.00224257	0	0.12273	0.739018
1701	11	94384536	95327210	1187	160	SLE	CAD	0.156957	-0.22887	0.56625	0.0246357	0	0.32117	0.406502
1714	11	105932283	107054024	1652	167	SLE	CAD	0.553824	0.15818	1	0.306721	0.02545	1	0.00980486
1722	11	116247378	117295641	1873	189	SLE	CAD	-0.135823	-0.46681	0.17732	0.0184478	0	0.21958	0.376567
1723	11	117295642	118901213	2334	262	SLE	CAD	0.324203	-0.03711	0.75896	0.105107	0	0.57602	0.0798747
1726	11	121208187	122589224	1719	204	SLE	CAD	-0.158595	-0.59438	0.25913	0.0251525	0	0.35507	0.431439
1733	11	128262551	129451784	1005	197	SLE	CAD	0.0382624	-0.29053	0.35998	0.00146401	0	0.14297	0.807637
1742	12	1942427	3069506	1519	196	SLE	CAD	-0.0852111	-0.48473	0.28441	0.00726093	0	0.24292	0.641898
1744	12	3871115	4967643	1383	231	SLE	CAD	-0.31457	-0.77886	0.07819	0.098954	0	0.60662	0.116667
1746	12	6023701	6948954	1188	152	SLE	CAD	0.095968	-0.32175	0.53091	0.00920985	0	0.29451	0.632148
1747	12	6948955	8123317	1441	160	SLE	CAD	0.0341804	-0.36195	0.42915	0.0011683	0	0.21325	0.856344
1764	12	23923799	25058714	1814	239	SLE	CAD	-0.128064	-0.41188	0.13575	0.0164004	0	0.16964	0.340747
1844	12	115439452	116197675	1206	199	SLE	CAD	0.296103	-0.12496	0.80174	0.087677	0	0.64278	0.157573
1848	12	119301062	120567740	1701	196	SLE	CAD	-0.194136	-0.55828	0.14642	0.0376888	0	0.31168	0.24879
1852	12	124843769	126079935	1914	269	SLE	CAD	-0.0887699	-0.35109	0.1604	0.00788009	0	0.12362	0.485609
1857	12	129170297	129887418	156	114	SLE	CAD	0.159018	-0.26902	0.60817	0.0252867	0	0.37204	0.439223
1867	13	22795189	23729049	1958	239	SLE	CAD	0.359281	-0.06223	0.86936	0.129083	0	0.75578	0.0930491
1873	13	28587126	30068525	2072	200	SLE	CAD	-0.111141	-0.47449	0.23802	0.0123522	0	0.22982	0.51494
1874	13	30068526	31433218	2290	239	SLE	CAD	0.189172	-0.24221	0.64862	0.0357859	0	0.42257	0.363736
1875	13	31433219	32986686	2186	229	SLE	CAD	0.0849458	-0.22728	0.41052	0.00721579	0	0.17078	0.587306
1887	13	43931932	45476446	1915	189	SLE	CAD	-0.593499	-1	-0.20944	0.352241	0.04386	1	0.00398951
1937	13	98527336	99402294	1347	186	SLE	CAD	-0.116441	-0.47557	0.23147	0.0135585	0	0.22722	0.492372
1948	13	109813577	110995432	2104	248	SLE	CAD	-0.0695487	-0.28613	0.13989	0.00483702	0	0.08239	0.50979
1963	14	29029225	30831154	1859	222	SLE	CAD	0.334229	0.02197	0.6785	0.111709	0.00191	0.46036	0.0365505
1965	14	32382246	33591113	1629	232	SLE	CAD	-0.158887	-0.56563	0.21536	0.0252451	0	0.32041	0.393035
1966	14	33591114	34695195	1524	298	SLE	CAD	0.268536	-0.0419	0.60158	0.0721113	0	0.3619	0.0831037
1999	14	68976913	69794542	1354	197	SLE	CAD	0.385743	0.00148	0.86085	0.148798	0.00188	0.74107	0.0574984
2002	14	72665320	73373373	1183	171	SLE	CAD	-0.225279	-0.64711	0.15771	0.0507506	0	0.42167	0.243324
2026	14	99474534	100786189	1676	211	SLE	CAD	-0.103559	-0.38398	0.15929	0.0107244	0	0.14771	0.434854
2038	15	25384328	26392947	1737	250	SLE	CAD	0.113885	-0.2386	0.47832	0.0129699	0	0.23102	0.506671
2055	15	47693317	49260006	1595	160	SLE	CAD	-0.171948	-0.64834	0.26626	0.0295662	0	0.42067	0.422085
2063	15	57641165	58712954	1682	247	SLE	CAD	-0.0724969	-0.46241	0.30134	0.0052558	0	0.22226	0.690716
2066	15	61130596	62106138	1480	252	SLE	CAD	0.345725	-0.00885	0.75503	0.119526	0	0.57008	0.0588772
2071	15	67396521	69089815	1996	207	SLE	CAD	0.139818	-0.1462	0.42925	0.0195489	0	0.18426	0.321053
2072	15	69089816	70767983	2035	250	SLE	CAD	0.0938396	-0.23767	0.42756	0.00880587	0	0.18462	0.563857
2076	15	74458114	76401952	1856	163	SLE	CAD	0.269813	-0.13553	0.7276	0.072799	0	0.5294	0.180879
2089	15	89385188	90632718	1509	181	SLE	CAD	-0.0314232	-0.38289	0.29751	0.000987419	0	0.16644	0.848955
2092	15	92675406	93707010	1696	248	SLE	CAD	-0.437967	-0.80478	-0.13626	0.191815	0.01896	0.64767	0.00768885
2095	15	95662426	96864278	1538	232	SLE	CAD	-0.108236	-0.3832	0.16145	0.011715	0	0.14755	0.420015
2106	16	4816146	5782968	1700	254	SLE	CAD	-0.266472	-0.6587	0.08719	0.0710072	0	0.43388	0.132895
2107	16	5782969	6446081	1158	230	SLE	CAD	-0.286929	-0.68452	0.0651	0.0823282	0	0.46857	0.112385
2117	16	12793150	13893407	2249	215	SLE	CAD	-0.0047299	-0.44616	0.40444	2.23719e-05	0	0.24838	0.981232
2123	16	22667049	24014705	1869	178	SLE	CAD	-0.383962	-0.76773	-0.04534	0.147427	0.00335	0.58941	0.0270473
2138	16	57119890	58508978	2374	242	SLE	CAD	0.342685	0.04071	0.68709	0.117433	0.00302	0.47209	0.0286571
2162	16	81437862	82310204	1582	245	SLE	CAD	-0.131105	-0.46282	0.18236	0.0171884	0	0.21463	0.394123
2163	16	82310205	83077869	1803	262	SLE	CAD	-0.543895	-0.95595	-0.22728	0.295822	0.05166	0.91383	0.00133621
2166	16	84440155	85146805	1648	257	SLE	CAD	-0.133323	-0.56352	0.26307	0.0177749	0	0.32228	0.489416
2167	16	85146806	86058597	1021	230	SLE	CAD	-0.164093	-0.4114	0.0695	0.0269266	0	0.16925	0.180683
2180	17	6305079	7264458	1154	212	SLE	CAD	0.0173081	-0.37599	0.40905	0.000299569	0	0.20806	0.92601
2181	17	7264459	8554763	1601	186	SLE	CAD	0.155176	-0.14887	0.47297	0.0240797	0	0.2237	0.311283
2202	17	36116885	37361178	966	161	SLE	CAD	-0.0129466	-0.37118	0.3473	0.000167614	0	0.17572	0.9409
2209	17	45883902	47516224	2399	193	SLE	CAD	-0.437697	-0.69073	-0.20873	0.191578	0.04357	0.47711	0.000305651
2210	17	47516225	48722590	1210	240	SLE	CAD	0.160879	-0.13627	0.47574	0.0258821	0	0.22672	0.27199
2216	17	54950108	56245227	1456	253	SLE	CAD	-0.364519	-0.76255	-0.01857	0.132874	0.00245	0.58149	0.0419416
2222	17	64438388	65582327	1692	235	SLE	CAD	0.319833	-0.07283	0.78549	0.102293	0	0.617	0.115722
2223	17	65582328	66757556	1509	173	SLE	CAD	-0.00149878	-0.3399	0.33142	2.24634e-06	0	0.14921	0.992731
2227	17	70495120	71466953	1289	245	SLE	CAD	-0.121982	-0.49386	0.22487	0.0148795	0	0.24473	0.487408
2228	17	71466954	72383472	1359	248	SLE	CAD	0.0344521	-0.41061	0.48677	0.00118695	0	0.27324	0.867301
2255	18	20009697	21622716	1898	152	SLE	CAD	0.232412	-0.18121	0.68695	0.0540154	0	0.47218	0.249976
2262	18	28792735	30401128	2145	198	SLE	CAD	0.0486033	-0.38335	0.48912	0.00236228	0	0.27783	0.811775
2268	18	38498382	39410165	1275	136	SLE	CAD	-0.249873	-0.77949	0.20557	0.0624365	0	0.60838	0.260368
2274	18	45718493	46558306	1309	237	SLE	CAD	0.0855575	-0.27473	0.45636	0.00732009	0	0.21369	0.623355
2276	18	47455926	48228379	1234	165	SLE	CAD	0.0218327	-0.43348	0.47854	0.000476667	0	0.27991	0.919079
2284	18	55809316	56832312	1593	211	SLE	CAD	-0.468817	-0.83749	-0.15363	0.21979	0.02385	0.70139	0.00542998
2318	19	10028841	11681978	2019	224	SLE	CAD	-0.00832996	-0.206	0.18615	6.93883e-05	0	0.05207	0.931609
2338	19	31763009	33028099	1564	191	SLE	CAD	0.33608	-0.06719	0.80037	0.11295	0	0.64059	0.0971051
2353	19	46765061	47752727	1103	161	SLE	CAD	-0.361079	-0.73302	-0.02003	0.130378	0.00214	0.53732	0.0383933
2369	20	60795	884241	1256	234	SLE	CAD	0.207551	-0.18523	0.65153	0.0430776	0	0.42449	0.279649
2370	20	884242	1771285	1402	210	SLE	CAD	-0.0289281	-0.47226	0.40037	0.000836834	0	0.26583	0.886748
2380	20	10279604	11257012	1544	187	SLE	CAD	0.39218	0.0468	0.79299	0.153805	0.00372	0.62884	0.0313409
2391	20	19957929	21682377	1738	197	SLE	CAD	0.261201	-0.19002	0.77862	0.0682258	0	0.60694	0.240583
2403	20	38427595	40272390	2198	215	SLE	CAD	-0.356359	-0.68326	-0.0543	0.126992	0.00415	0.46684	0.0190029
2404	20	40272391	41351514	1816	227	SLE	CAD	0.583005	0.21211	1	0.339895	0.04505	1	0.00337961
2408	20	44072211	45673603	2328	243	SLE	CAD	-0.435703	-0.88909	-0.07158	0.189837	0.00702	0.79049	0.0222967
2412	20	48212976	49236418	1480	174	SLE	CAD	-0.17643	-0.51515	0.15157	0.0311276	0	0.2654	0.280337
2413	20	49236419	50653620	2136	254	SLE	CAD	-0.10516	-0.54028	0.30234	0.0110587	0	0.30225	0.596383
2422	20	56951774	57924037	293	102	SLE	CAD	0.189066	-0.24976	0.66435	0.035746	0	0.44136	0.378337
2449	21	34383795	35729261	1687	235	SLE	CAD	-0.183045	-0.42791	0.04737	0.0335056	0	0.1831	0.121044
2450	21	35729262	37303548	2177	238	SLE	CAD	0.0126181	-0.42759	0.45961	0.000159216	0	0.27152	0.951047
2453	21	39252060	40480831	1714	231	SLE	CAD	-0.129289	-0.52626	0.24028	0.0167156	0	0.28118	0.47981
2457	21	43081435	43812791	230	143	SLE	CAD	0.15885	-0.25115	0.58423	0.0252332	0	0.34213	0.420073
2458	21	43812792	44815008	144	92	SLE	CAD	0.053373	-0.41575	0.52572	0.00284868	0	0.31594	0.810156
2464	22	18535226	19635654	1208	148	SLE	CAD	-0.261266	-0.67777	0.10387	0.0682601	0	0.45937	0.155445
2465	22	19635655	20969184	1295	165	SLE	CAD	-0.48402	-0.82964	-0.18616	0.234275	0.03466	0.68831	0.00263096
2466	22	20969185	22404422	1254	122	SLE	CAD	-0.354478	-0.70035	-0.03733	0.125655	0.0032	0.49048	0.0326603
2469	22	23950733	25282436	1485	136	SLE	CAD	-0.473583	-0.71507	-0.23822	0.224281	0.05675	0.51132	0.000236984
2472	22	27192924	27952441	1392	264	SLE	CAD	0.636738	0.26237	1	0.405435	0.06884	1	0.00161758
2477	22	32662294	33501725	1530	180	SLE	CAD	-0.193385	-0.60722	0.18337	0.0373978	0	0.37033	0.312414
2482	22	37364005	38718589	1760	226	SLE	CAD	0.136578	-0.24236	0.53208	0.0186536	0	0.28629	0.466193
11	1	8580988	9475966	1050	185	SLE	VTE	0.129239	-0.29723	0.57574	0.0167027	0	0.33804	0.525126
14	1	11709174	13481025	1341	159	SLE	VTE	-0.294794	-0.71044	0.06407	0.0869038	0	0.50473	0.113035
21	1	19238925	20556202	2146	200	SLE	VTE	-0.290353	-0.76566	0.11387	0.084305	0	0.58623	0.149448
80	1	91870060	92904465	1364	136	SLE	VTE	0.0118642	-0.48679	0.49518	0.00014076	0	0.33865	0.958021
98	1	111134063	112489248	2328	243	SLE	VTE	0.170434	-0.17381	0.55367	0.0290478	0	0.30709	0.333744
113	1	154685546	156813845	1624	203	SLE	VTE	-0.037788	-0.38467	0.3005	0.00142793	0	0.16098	0.817872
117	1	159882516	161054076	1471	192	SLE	VTE	-0.41688	-0.92982	-0.00164	0.173789	0.00195	0.86457	0.0507715
118	1	161054077	161945442	1244	115	SLE	VTE	-0.271053	-0.72519	0.14172	0.07347	0	0.5259	0.186216
130	1	172465154	173582511	1170	143	SLE	VTE	0.384007	0.07494	0.74825	0.147461	0.00681	0.55988	0.0173555
154	1	200134006	201067952	1318	143	SLE	VTE	-0.100706	-0.54324	0.33759	0.0101417	0	0.30422	0.619429
155	1	201067953	202583884	2048	267	SLE	VTE	0.194697	-0.08487	0.48386	0.0379069	0	0.23412	0.15967
156	1	202583885	204092537	1891	226	SLE	VTE	-0.294522	-0.62313	0.01368	0.086743	0	0.3883	0.0585915
159	1	205917549	208162951	1764	192	SLE	VTE	0.270368	0.02239	0.53392	0.0730989	0.00155	0.28507	0.0353893
179	1	230227248	231287764	2180	245	SLE	VTE	-0.11083	-0.46462	0.22867	0.0122832	0	0.21873	0.512482
184	1	234365797	235097113	1214	196	SLE	VTE	0.00391439	-0.33962	0.35387	1.53225e-05	0	0.16279	0.981556
251	2	45850048	46499326	1105	235	SLE	VTE	-0.14576	-0.44304	0.14046	0.021246	0	0.19629	0.310517
267	2	59251997	60775066	2087	261	SLE	VTE	0.377203	0.01434	0.82477	0.142282	0.00209	0.68025	0.0482916
271	2	64696090	65938002	1698	196	SLE	VTE	-0.280978	-0.63157	0.04892	0.0789487	0	0.39888	0.0918719
275	2	68877775	70756283	2376	217	SLE	VTE	-0.475904	-0.98201	-0.0763	0.226484	0.00809	0.96434	0.0212415
290	2	84395900	85992794	2177	191	SLE	VTE	-0.185478	-0.58059	0.18863	0.0344022	0	0.33708	0.312899
359	2	174118390	174927563	1128	169	SLE	VTE	0.175015	-0.22593	0.60076	0.0306304	0	0.36156	0.37095
393	2	215899571	217566011	2092	251	SLE	VTE	-0.110777	-0.47218	0.23373	0.0122715	0	0.22673	0.509192
407	2	230541093	231847386	2012	214	SLE	VTE	-0.0465913	-0.52043	0.41746	0.00217075	0	0.308	0.827799
424	3	2140012	3128152	1699	268	SLE	VTE	0.147655	-0.22594	0.54671	0.0218021	0	0.30372	0.418061
425	3	3128153	4109393	1900	233	SLE	VTE	0.287198	-0.06477	0.6852	0.0824824	0	0.4695	0.113421
449	3	28649811	29877022	2316	241	SLE	VTE	0.472895	0.09615	0.96411	0.22363	0.00976	0.9295	0.017641
471	3	58557719	59998583	1930	219	SLE	VTE	-0.0679887	-0.37593	0.22854	0.00462246	0	0.14375	0.644775
472	3	59998584	60571139	1228	189	SLE	VTE	0.213373	-0.22044	0.6968	0.0455279	0	0.48624	0.316926
474	3	61277588	62609818	1653	255	SLE	VTE	0.475654	0.08496	0.99651	0.226246	0.00915	0.99304	0.0214614
483	3	71223282	72334704	1423	257	SLE	VTE	0.531411	0.15315	1	0.282397	0.02422	1	0.00819291
484	3	72334705	73606612	1489	224	SLE	VTE	0.0301187	-0.29095	0.36205	0.000907136	0	0.14863	0.850864
519	3	113657666	115649909	2051	237	SLE	VTE	0.348566	0.02723	0.7146	0.121498	0.00217	0.51066	0.0359005
532	3	125992651	127495173	2352	217	SLE	VTE	0.114118	-0.27343	0.52446	0.0130229	0	0.28193	0.542936
551	3	148638309	149998411	2201	223	SLE	VTE	0.226666	-0.07614	0.55494	0.0513774	0	0.30795	0.143575
570	3	168972663	170174578	1511	153	SLE	VTE	0.201542	-0.24456	0.6955	0.0406191	0	0.4864	0.355976
573	3	172004761	173415591	1735	187	SLE	VTE	0.474598	0.04861	1	0.225244	0.00597	1	0.0325161
577	3	176931164	178110322	1486	198	SLE	VTE	-0.384872	-0.78858	-0.02673	0.148126	0.00317	0.62187	0.0337023
583	3	185709997	186602045	1054	194	SLE	VTE	0.161309	-0.13152	0.46155	0.0260206	0	0.21351	0.264983
584	3	186602046	187939199	1959	272	SLE	VTE	0.26038	-0.0873	0.65324	0.0677976	0	0.42672	0.142155
586	3	189451806	190591293	1875	194	SLE	VTE	0.0733737	-0.35816	0.51061	0.00538369	0	0.27934	0.717523
603	4	5972710	7135819	1743	274	SLE	VTE	0.171481	-0.15948	0.52228	0.0294056	0	0.27277	0.296097
604	4	7135820	7726034	1279	254	SLE	VTE	-0.148494	-0.51775	0.20094	0.0220504	0	0.26848	0.392707
624	4	25832019	27385580	1571	215	SLE	VTE	0.122299	-0.22993	0.4965	0.0149571	0	0.24834	0.486619
638	4	37880861	38984838	1967	242	SLE	VTE	-0.477079	-0.83217	-0.1676	0.227604	0.02809	0.69251	0.00321173
698	4	109978983	111733579	2247	210	SLE	VTE	0.469497	0.1324	0.86413	0.220427	0.01777	0.74672	0.00753302
727	4	139553761	141087047	1696	225	SLE	VTE	0.334615	-0.03118	0.75494	0.111967	0	0.56993	0.069806
738	4	155044410	156520288	1930	180	SLE	VTE	0.0687461	-0.14934	0.29137	0.00472603	0	0.08576	0.522967
739	4	156520289	157597309	2349	188	SLE	VTE	0.281706	-0.13319	0.76465	0.0793585	0	0.58543	0.175548
782	5	5828695	6936733	2327	245	SLE	VTE	0.049582	-0.29911	0.41958	0.00245838	0	0.18917	0.770535
801	5	28315654	29593755	2185	136	SLE	VTE	0.285306	-0.16922	0.81185	0.0813997	0	0.65935	0.201914
804	5	31679465	32727914	1531	210	SLE	VTE	-0.062475	-0.40239	0.26166	0.00390313	0	0.1678	0.698335
809	5	37925488	39438985	1954	196	SLE	VTE	0.00452562	-0.39412	0.39099	2.04812e-05	0	0.20299	0.980576
822	5	55221399	55968966	1254	199	SLE	VTE	0.0932406	-0.36303	0.58067	0.00869381	0	0.3577	0.666107
841	5	79005159	80448225	2235	247	SLE	VTE	-0.463465	-0.96098	-0.06797	0.2148	0.0072	0.92348	0.02338
887	5	130573818	132554690	1780	118	SLE	VTE	0.466873	0.05136	1	0.217971	0.00551	1	0.0359136
888	5	132554691	134556570	2418	282	SLE	VTE	-0.220716	-0.53577	0.0735	0.0487155	0	0.28705	0.140012
894	5	142532957	143605908	1454	163	SLE	VTE	0.642078	0.27849	1	0.412264	0.07755	1	0.00123984
898	5	148662215	149850203	1513	230	SLE	VTE	0.106158	-0.29112	0.53472	0.0112695	0	0.29025	0.58731
918	5	170898341	172285682	1881	266	SLE	VTE	0.255078	-0.0584	0.58412	0.065065	0	0.34119	0.104959
920	5	173606996	174662885	1705	239	SLE	VTE	0.0649722	-0.27398	0.4009	0.00422139	0	0.16726	0.689767
932	6	6621938	7808323	2012	262	SLE	VTE	0.088113	-0.19159	0.37966	0.0077639	0	0.14587	0.535327
937	6	13352327	15069421	1861	241	SLE	VTE	-0.227441	-0.69011	0.18005	0.0517293	0	0.47673	0.252691
949	6	24950380	25684629	1675	157	SLE	VTE	-0.179899	-0.43295	0.06272	0.0323636	0	0.18744	0.145253
950	6	25684630	26396200	1376	90	SLE	VTE	-0.156899	-0.45596	0.14536	0.0246173	0	0.2079	0.296745
953	6	28666365	29529755	197	47	SLE	VTE	-0.137455	-0.47215	0.19216	0.018894	0	0.22466	0.391207
954	6	29529756	29833843	242	31	SLE	VTE	-0.0775618	-0.4222	0.26021	0.00601583	0	0.18972	0.636018
956	6	30070718	30715006	30	17	SLE	VTE	0.151632	-0.32279	0.61955	0.0229923	0	0.38466	0.501743
957	6	30715007	31106493	251	61	SLE	VTE	0.0614489	-0.13236	0.25768	0.00377597	0	0.06755	0.541591
958	6	31106494	31250556	185	34	SLE	VTE	-0.152643	-0.38349	0.07752	0.0232998	0	0.14706	0.187747
959	6	31250557	31320268	85	16	SLE	VTE	0.0363996	-0.19865	0.26837	0.00132493	0	0.07709	0.758767
960	6	31320269	31427209	236	35	SLE	VTE	0.0903947	-0.09905	0.28418	0.00817119	0	0.08077	0.347666
961	6	31427210	32208901	588	105	SLE	VTE	-0.0473497	-0.22729	0.1307	0.00224199	0	0.05253	0.605448
965	6	32586785	32629239	29	13	SLE	VTE	0.0372635	-0.32151	0.40019	0.00138857	0	0.17746	0.828057
967	6	32682214	32897998	319	54	SLE	VTE	0.0588935	-0.22645	0.35404	0.00346844	0	0.13365	0.678302
970	6	33864263	34979270	1562	142	SLE	VTE	0.165482	-0.17383	0.51697	0.0273843	0	0.26726	0.32664
971	6	34979271	36346353	1731	176	SLE	VTE	-0.0434644	-0.45278	0.37022	0.00188916	0	0.23729	0.823532
976	6	40778402	42103738	1905	245	SLE	VTE	0.243606	-0.11291	0.63317	0.0593436	0	0.4009	0.174613
1063	6	137553213	138825721	2106	199	SLE	VTE	0.0659387	-0.24016	0.37909	0.00434791	0	0.1498	0.661414
1079	6	155523958	156762740	2053	234	SLE	VTE	-0.347567	-0.82055	0.03929	0.120803	0	0.6733	0.083694
1127	7	28890887	30175113	2142	240	SLE	VTE	-0.0853987	-0.47271	0.29005	0.00729293	0	0.22931	0.644326
1209	7	130418705	131856481	1894	243	SLE	VTE	0.129944	-0.19075	0.47531	0.0168854	0	0.22807	0.425957
1228	7	155280611	156344386	1117	208	SLE	VTE	-0.188723	-0.67997	0.24638	0.0356164	0	0.46471	0.380539
1235	8	1628040	2070902	794	207	SLE	VTE	-0.254882	-0.59661	0.06656	0.0649649	0	0.35594	0.112668
1244	8	6019164	6663427	1621	216	SLE	VTE	0.0665813	-0.25905	0.3781	0.00443307	0	0.14884	0.670098
1250	8	10478852	11466761	1676	193	SLE	VTE	-0.203902	-0.53532	0.1111	0.0415762	0	0.28657	0.197302
1353	8	128073655	129291118	1946	270	SLE	VTE	-0.067046	-0.37162	0.22741	0.00449516	0	0.14256	0.645024
1358	8	133461552	134509448	1681	216	SLE	VTE	-0.0948901	-0.43995	0.24639	0.00900413	0	0.19675	0.57343
1412	9	34704545	36749273	2291	245	SLE	VTE	0.402384	0.03249	0.8543	0.161913	0.00335	0.72982	0.0373318
1427	9	81161598	82601465	1669	248	SLE	VTE	0.176221	-0.14416	0.50437	0.0310539	0	0.25439	0.272729
1443	9	97418634	98885862	1788	188	SLE	VTE	-0.214371	-0.6693	0.18494	0.0459551	0	0.44991	0.287467
1453	9	109150718	110630150	2058	259	SLE	VTE	-0.340092	-0.70637	-0.0161	0.115662	0.00181	0.49896	0.0411263
1478	9	135135888	136042490	1214	187	SLE	VTE	-0.270082	-0.58108	0.00069	0.0729443	0	0.33766	0.0504576
1490	10	3880323	4813182	1513	202	SLE	VTE	0.0067779	-0.39076	0.40955	4.59399e-05	0	0.21904	0.97152
1495	10	7659873	8771920	2163	246	SLE	VTE	0.155267	-0.23834	0.57972	0.0241079	0	0.33662	0.42458
1544	10	62626466	64069687	2041	188	SLE	VTE	-0.171063	-0.55522	0.18953	0.0292625	0	0.30906	0.335959
1552	10	71050505	71672997	1239	209	SLE	VTE	-0.0312362	-0.20797	0.14546	0.000975698	0	0.04553	0.723516
1554	10	72659224	73514214	1502	236	SLE	VTE	0.347089	0.02086	0.71652	0.120471	0.0019	0.5134	0.0416735
1559	10	79952997	81190573	1907	276	SLE	VTE	0.0312503	-0.30324	0.3727	0.000976579	0	0.15958	0.851406
1603	10	129831970	130694008	1487	237	SLE	VTE	-0.0889556	-0.4151	0.229	0.0079131	0	0.17635	0.571746
1624	11	11632651	12470449	1500	227	SLE	VTE	0.133795	-0.19968	0.48876	0.0179011	0	0.23969	0.425484
1646	11	33905328	34672697	1150	150	SLE	VTE	0.293722	-0.14161	0.80258	0.0862729	0	0.6463	0.182826
1656	11	43949378	45019559	1675	254	SLE	VTE	0.113056	-0.24929	0.48778	0.0127817	0	0.24231	0.52137
1671	11	60515106	61717117	1144	157	SLE	VTE	0.156127	-0.15544	0.48464	0.0243756	0	0.23531	0.315398
1674	11	64594823	66782661	2031	188	SLE	VTE	0.0293341	-0.38965	0.44192	0.000860492	0	0.23728	0.881354
1714	11	105932283	107054024	1643	166	SLE	VTE	-0.123025	-0.56847	0.30694	0.0151351	0	0.32832	0.54816
1733	11	128262551	129451784	1000	194	SLE	VTE	0.226627	-0.00827	0.46008	0.0513596	0	0.21167	0.0551421
1743	12	3069507	3871114	1387	222	SLE	VTE	-0.131445	-0.52581	0.24638	0.0172779	0	0.27818	0.470896
1744	12	3871115	4967643	1376	230	SLE	VTE	-0.134936	-0.57127	0.27397	0.0182077	0	0.33281	0.497866
1746	12	6023701	6948954	1181	152	SLE	VTE	-0.140084	-0.43738	0.14561	0.0196234	0	0.1929	0.310625
1752	12	11742150	12721874	1070	167	SLE	VTE	0.0121209	-0.31981	0.33938	0.000146916	0	0.14578	0.94031
1753	12	12721875	13559527	976	176	SLE	VTE	0.0292919	-0.34914	0.40659	0.000858015	0	0.19113	0.872264
1764	12	23923799	25058714	1809	239	SLE	VTE	0.0230395	-0.3203	0.36831	0.000530817	0	0.16178	0.889988
1800	12	64403858	66114643	1487	173	SLE	VTE	0.110928	-0.32723	0.59478	0.012305	0	0.36343	0.611708
1825	12	94385885	95147845	1266	207	SLE	VTE	0.149147	-0.30685	0.64203	0.0222449	0	0.41925	0.495242
1852	12	124843769	126079935	1900	266	SLE	VTE	-0.144765	-0.59192	0.26427	0.0209568	0	0.35674	0.465487
1942	13	104378436	105672500	1984	201	SLE	VTE	-0.360374	-0.83249	0.02165	0.129869	0	0.69305	0.0732481
1945	13	107037865	108521978	2053	275	SLE	VTE	0.231765	-0.03615	0.51439	0.053715	0	0.2646	0.0873697
1955	14	20876081	21982654	1448	265	SLE	VTE	0.0124726	-0.29567	0.32544	0.000155565	0	0.13324	0.935472
1957	14	22760701	23985936	1504	236	SLE	VTE	-0.383505	-0.70676	-0.08219	0.147076	0.00751	0.49951	0.0124623
1958	14	23985937	24906056	1011	152	SLE	VTE	0.0877481	-0.2517	0.42921	0.00769973	0	0.18665	0.597247
1963	14	29029225	30831154	1844	219	SLE	VTE	-0.0221537	-0.32904	0.27754	0.000490784	0	0.12158	0.881239
1966	14	33591114	34695195	1513	297	SLE	VTE	0.175814	-0.11495	0.47325	0.0309107	0	0.22396	0.224804
2019	14	92101229	93386328	2058	236	SLE	VTE	0.185084	-0.10252	0.49216	0.034256	0	0.24222	0.210391
2021	14	94892241	95946792	2053	284	SLE	VTE	-0.0180403	-0.31259	0.27102	0.000325454	0	0.11662	0.900207
2023	14	97174315	98268391	1568	191	SLE	VTE	-0.127754	-0.56539	0.28777	0.016321	0	0.32556	0.519663
2026	14	99474534	100786189	1670	211	SLE	VTE	-0.104654	-0.5032	0.28426	0.0109524	0	0.25447	0.577184
2038	15	25384328	26392947	1745	247	SLE	VTE	0.175494	-0.17264	0.55263	0.0307981	0	0.30708	0.313319
2071	15	67396521	69089815	1988	206	SLE	VTE	-0.209104	-0.69359	0.23043	0.0437246	0	0.48107	0.321238
2092	15	92675406	93707010	1684	246	SLE	VTE	0.320161	0.0516	0.61376	0.102503	0.00324	0.3767	0.0228459
2095	15	95662426	96864278	1526	229	SLE	VTE	0.133204	-0.15952	0.44113	0.0177432	0	0.19508	0.372798
2123	16	22667049	24014705	1863	177	SLE	VTE	-0.308759	-0.67385	0.02892	0.0953321	0	0.45407	0.0700526
2124	16	24014706	25235251	1499	223	SLE	VTE	-0.151621	-0.54507	0.21744	0.0229889	0	0.29746	0.400651
2128	16	29043178	31384210	1115	115	SLE	VTE	0.430183	0.19225	0.6888	0.185057	0.03696	0.47444	0.000620892
2159	16	78973581	79662634	1275	253	SLE	VTE	-0.382825	-0.86296	0.01053	0.146555	0	0.7447	0.0593572
2160	16	79662635	80559685	1863	213	SLE	VTE	0.306798	-0.09932	0.78099	0.0941253	0	0.61041	0.136189
2162	16	81437862	82310204	1574	245	SLE	VTE	-0.101743	-0.38547	0.16586	0.0103516	0	0.14896	0.448463
2165	16	83778372	84440154	1675	269	SLE	VTE	0.050536	-0.24122	0.3406	0.00255389	0	0.12349	0.723508
2166	16	84440155	85146805	1641	256	SLE	VTE	-0.0879809	-0.47441	0.28378	0.00774064	0	0.2334	0.62914
2167	16	85146806	86058597	1009	228	SLE	VTE	0.116708	-0.11543	0.3524	0.0136207	0	0.12419	0.321341
2180	17	6305079	7264458	1143	209	SLE	VTE	0.0539756	-0.27368	0.37947	0.00291337	0	0.15563	0.736497
2181	17	7264459	8554763	1591	186	SLE	VTE	0.573626	0.22426	1	0.329047	0.05029	1	0.00249203
2198	17	31318754	32356061	1710	234	SLE	VTE	-0.109052	-0.47203	0.236	0.0118924	0	0.224	0.52894
2209	17	45883902	47516224	2388	191	SLE	VTE	0.051984	-0.27577	0.37868	0.00270234	0	0.15569	0.745999
2210	17	47516225	48722590	1200	239	SLE	VTE	0.113625	-0.11378	0.3431	0.0129107	0	0.11827	0.318121
2228	17	71466954	72383472	1343	246	SLE	VTE	-0.0773814	-0.55535	0.3684	0.00598788	0	0.32711	0.719824
2247	18	8788525	9816164	1934	241	SLE	VTE	-0.449629	-0.81827	-0.14854	0.202167	0.02212	0.66956	0.00581423
2274	18	45718493	46558306	1302	236	SLE	VTE	0.157883	-0.23986	0.60278	0.0249269	0	0.36625	0.424285
2310	19	3085447	3893909	852	150	SLE	VTE	0.330411	-0.07473	0.79971	0.109171	0	0.63953	0.105613
2318	19	10028841	11681978	2011	224	SLE	VTE	-0.0483296	-0.24864	0.14941	0.00233575	0	0.06328	0.635658
2340	19	33785836	34633274	1499	189	SLE	VTE	-0.127788	-0.57752	0.29062	0.0163298	0	0.33729	0.52714
2353	19	46765061	47752727	1096	161	SLE	VTE	0.152245	-0.21856	0.56508	0.0231786	0	0.32079	0.413227
2355	19	48573066	49415189	1242	138	SLE	VTE	-0.385821	-0.74422	-0.05792	0.148857	0.00455	0.55386	0.023397
2369	20	60795	884241	1251	234	SLE	VTE	-0.291864	-0.80514	0.14019	0.0851844	0	0.64849	0.178279
2408	20	44072211	45673603	2313	242	SLE	VTE	0.143856	-0.27849	0.5861	0.0206945	0	0.34608	0.483918
2415	20	51533751	52411532	941	198	SLE	VTE	0.226775	-0.19553	0.69303	0.0514269	0	0.4812	0.276575
2449	21	34383795	35729261	1679	234	SLE	VTE	0.123578	-0.25271	0.53561	0.0152715	0	0.28986	0.507281
2450	21	35729262	37303548	2169	236	SLE	VTE	0.176119	-0.24584	0.64602	0.0310181	0	0.42021	0.39886
2457	21	43081435	43812791	230	143	SLE	VTE	0.130548	-0.24209	0.52208	0.0170428	0	0.2745	0.478496
2477	22	32662294	33501725	1520	179	SLE	VTE	0.358939	-0.01819	0.80309	0.128837	0	0.64496	0.0608939
2482	22	37364005	38718589	1753	225	SLE	VTE	0.576675	0.23118	1	0.332554	0.05344	1	0.00193208
2485	22	41722788	42867927	1186	124	SLE	VTE	0.0949943	-0.36805	0.57485	0.00902392	0	0.34866	0.667837
2488	22	44409534	45170649	1316	239	SLE	VTE	-0.0569934	-0.33842	0.22927	0.00324825	0	0.12019	0.685339
26	1	23907046	25885138	1949	209	SLE	HF	0.106366	-0.22116	0.44177	0.0113137	0	0.19866	0.509552
52	1	59889046	61377615	1778	197	SLE	HF	0.0534302	-0.31811	0.45136	0.00285478	0	0.21661	0.774223
101	1	114664388	116207297	2374	209	SLE	HF	-0.0674604	-0.44324	0.30636	0.0045509	0	0.20828	0.711328
159	1	205917549	208162951	1718	188	SLE	HF	0.00193956	-0.39231	0.39699	3.7619e-06	0	0.21313	0.99181
176	1	226534712	228045554	2711	175	SLE	HF	-0.0250271	-0.47617	0.43694	0.000626357	0	0.29236	0.906647
221	2	15721704	17241115	2029	247	SLE	HF	-0.194515	-0.60407	0.18187	0.037836	0	0.36588	0.300478
355	2	170865766	171566482	1155	169	SLE	HF	-0.23201	-0.72493	0.2085	0.0538288	0	0.52583	0.278763
363	2	179224871	180336045	1443	161	SLE	HF	0.106247	-0.34208	0.58177	0.0112884	0	0.35178	0.616871
424	3	2140012	3128152	1669	266	SLE	HF	0.223544	-0.15249	0.64248	0.049972	0	0.41318	0.240291
435	3	12859210	14312007	2052	249	SLE	HF	0.29875	-0.04691	0.67697	0.0892513	0	0.45829	0.0892998
519	3	113657666	115649909	1986	231	SLE	HF	-0.0359877	-0.41026	0.33443	0.00129511	0	0.18764	0.839947
584	3	186602046	187939199	1910	266	SLE	HF	0.205888	-0.08701	0.51902	0.04239	0	0.26938	0.169893
603	4	5972710	7135819	1688	270	SLE	HF	0.321117	-0.05914	0.77553	0.103116	0	0.60145	0.102591
619	4	20086839	21416380	2073	221	SLE	HF	0.186176	-0.15175	0.55497	0.0346615	0	0.30861	0.275765
638	4	37880861	38984838	1904	237	SLE	HF	-0.250576	-0.68001	0.12814	0.0627886	0	0.46303	0.188651
698	4	109978983	111733579	2206	208	SLE	HF	0.144032	-0.12253	0.42291	0.0207453	0	0.17885	0.284561
727	4	139553761	141087047	1610	216	SLE	HF	-0.276564	-0.7151	0.11248	0.0764876	0	0.51137	0.157248
728	4	141087048	142807914	2107	191	SLE	HF	0.428398	0.03041	0.92194	0.183525	0.00334	0.84997	0.0357793
765	4	182065647	182946258	1673	234	SLE	HF	0.146056	-0.25466	0.56994	0.0213323	0	0.32758	0.452995
777	5	1206610	2106885	1526	212	SLE	HF	-0.048467	-0.44794	0.33749	0.00234905	0	0.22394	0.793948
778	5	2106886	2960068	1596	214	SLE	HF	-0.111552	-0.58256	0.33976	0.0124439	0	0.35599	0.605952
785	5	9203856	10549029	1849	247	SLE	HF	-0.232034	-0.57836	0.08377	0.05384	0	0.3345	0.148668
832	5	65606871	67096191	2035	184	SLE	HF	-0.382999	-0.80938	-0.01983	0.146688	0.00256	0.65509	0.0404296
873	5	116208001	117348497	1843	188	SLE	HF	-0.183926	-0.61234	0.21302	0.0338288	0	0.37771	0.350853
888	5	132554691	134556570	2301	275	SLE	HF	0.079402	-0.24206	0.40786	0.00630467	0	0.1727	0.619486
912	5	162386028	163781268	2067	199	SLE	HF	0.371757	-0.0671	0.91139	0.138203	0	0.83063	0.092411
920	5	173606996	174662885	1660	235	SLE	HF	0.323928	-0.01616	0.69017	0.104929	0	0.47634	0.0564543
921	5	174662886	176180301	1480	211	SLE	HF	0.195601	-0.18142	0.60274	0.0382599	0	0.36335	0.300722
926	6	63979	1380679	1754	251	SLE	HF	-0.0890003	-0.43193	0.23848	0.00792106	0	0.1881	0.584964
928	6	2746532	3964072	1805	239	SLE	HF	0.200398	-0.20853	0.62935	0.0401595	0	0.39706	0.30183
932	6	6621938	7808323	1945	251	SLE	HF	0.61853	0.31879	0.98495	0.382579	0.10163	0.97012	0.000118279
971	6	34979271	36346353	1655	172	SLE	HF	-0.13325	-0.59837	0.30162	0.0177556	0	0.36559	0.52769
976	6	40778402	42103738	1798	239	SLE	HF	0.168031	-0.22734	0.6027	0.0282344	0	0.36379	0.388776
1057	6	129850179	130550137	1198	182	SLE	HF	0.232546	-0.16417	0.66851	0.0540778	0	0.44691	0.238558
1071	6	148184845	149278798	1952	243	SLE	HF	-0.334976	-0.70985	-0.00109	0.112209	0.00131	0.50388	0.0497935
1221	7	147352172	148622913	2068	213	SLE	HF	0.0175602	-0.37245	0.41232	0.000308359	0	0.21155	0.924771
1227	7	154407488	155280610	1565	224	SLE	HF	0.213089	-0.14532	0.6211	0.0454071	0	0.38594	0.241782
1250	8	10478852	11466761	1637	191	SLE	HF	-0.520308	-0.89693	-0.20918	0.270721	0.04376	0.80448	0.00189891
1412	9	34704545	36749273	2199	235	SLE	HF	0.341183	-0.055	0.82392	0.116406	0	0.67885	0.0957324
1424	9	78630916	79451035	1335	208	SLE	HF	-0.0434751	-0.42442	0.34002	0.00189008	0	0.20858	0.813442
1427	9	81161598	82601465	1624	241	SLE	HF	-0.43858	-0.80406	-0.11432	0.192352	0.01339	0.64651	0.00858218
1457	9	112865521	113646149	1289	186	SLE	HF	0.324092	-0.0637	0.78028	0.105035	0	0.60883	0.102953
1488	10	2637066	3225336	1164	155	SLE	HF	0.0770758	-0.39349	0.56474	0.00594068	0	0.3434	0.728855
1552	10	71050505	71672997	1196	200	SLE	HF	-0.0211108	-0.38029	0.33443	0.000445666	0	0.18026	0.901942
1553	10	71672998	72659223	1889	229	SLE	HF	-0.274187	-0.7013	0.10666	0.0751788	0	0.49182	0.152391
1576	10	98005995	99367800	1631	190	SLE	HF	-0.169574	-0.59925	0.22777	0.0287553	0	0.36343	0.384216
1589	10	114255955	115588903	1516	215	SLE	HF	0.150435	-0.20828	0.53777	0.0226306	0	0.29069	0.401297
1624	11	11632651	12470449	1485	224	SLE	HF	0.0913005	-0.30648	0.50209	0.00833578	0	0.26674	0.629974
1722	11	116247378	117295641	1818	182	SLE	HF	-0.342465	-0.74523	-0.00477	0.117282	0.00143	0.55537	0.0549436
1736	11	131424362	132584401	172	119	SLE	HF	-0.311686	-0.79544	0.11934	0.0971484	0	0.63533	0.143837
1743	12	3069507	3871114	1350	219	SLE	HF	-0.398467	-0.87405	-0.01532	0.158776	0.00237	0.76396	0.0439488
1744	12	3871115	4967643	1342	226	SLE	HF	-0.10453	-0.60426	0.36198	0.0109265	0	0.3857	0.6363
1764	12	23923799	25058714	1748	232	SLE	HF	0.574588	0.2668	0.95206	0.330151	0.07118	0.90641	0.000577369
1857	12	129170297	129887418	154	112	SLE	HF	0.263682	-0.12898	0.69911	0.0695281	0	0.48875	0.180456
1867	13	22795189	23729049	1898	235	SLE	HF	-0.15875	-0.6333	0.27069	0.0252014	0	0.40272	0.442954
1948	13	109813577	110995432	2043	245	SLE	HF	0.0953319	-0.24155	0.43655	0.00908817	0	0.19271	0.562565
2017	14	89482884	90662836	1475	195	SLE	HF	-0.113788	-0.47235	0.22863	0.0129478	0	0.22488	0.501159
2021	14	94892241	95946792	1980	277	SLE	HF	-0.0419876	-0.35944	0.27617	0.00176296	0	0.14037	0.787916
2092	15	92675406	93707010	1630	240	SLE	HF	0.0197335	-0.35317	0.40352	0.000389411	0	0.19135	0.913763
2093	15	93707011	94565521	1532	236	SLE	HF	0.0308092	-0.34676	0.40185	0.000949207	0	0.19614	0.863081
2106	16	4816146	5782968	1659	249	SLE	HF	0.0630057	-0.33457	0.47142	0.00396971	0	0.24048	0.739508
2107	16	5782969	6446081	1123	224	SLE	HF	0.00228066	-0.45016	0.4542	5.2014e-06	0	0.27889	0.991296
2124	16	24014706	25235251	1461	222	SLE	HF	-0.23177	-0.6258	0.11242	0.0537172	0	0.39163	0.192707
2162	16	81437862	82310204	1501	238	SLE	HF	-0.042897	-0.50587	0.41707	0.00184015	0	0.291	0.839699
2166	16	84440155	85146805	1594	251	SLE	HF	0.211935	-0.14852	0.60723	0.0449164	0	0.36927	0.237047
2181	17	7264459	8554763	1539	181	SLE	HF	0.192902	-0.19613	0.60568	0.0372113	0	0.36777	0.306378
2216	17	54950108	56245227	1382	251	SLE	HF	-0.342601	-0.73954	-0.00709	0.117375	0.00156	0.54692	0.0501918
2227	17	70495120	71466953	1228	238	SLE	HF	-0.0307466	-0.39298	0.33313	0.00094535	0	0.18292	0.860388
2245	18	6756497	7862479	1400	201	SLE	HF	0.0599574	-0.31626	0.44588	0.00359488	0	0.20956	0.744944
2284	18	55809316	56832312	1555	205	SLE	HF	0.0489563	-0.35258	0.4755	0.00239672	0	0.25095	0.799907
2318	19	10028841	11681978	1867	215	SLE	HF	0.0355527	-0.29911	0.37756	0.00126399	0	0.16267	0.830265
2357	19	50451926	51259178	816	142	SLE	HF	-0.392418	-0.81045	-0.01817	0.153991	0.00222	0.65683	0.0359706
2369	20	60795	884241	1221	230	SLE	HF	-0.17895	-0.63663	0.23661	0.032023	0	0.40564	0.380624
2380	20	10279604	11257012	1505	184	SLE	HF	-0.339788	-0.74436	0.01673	0.115456	0	0.55406	0.0642069
2391	20	19957929	21682377	1697	192	SLE	HF	-0.0267109	-0.44615	0.39649	0.000713475	0	0.23926	0.895267
2404	20	40272391	41351514	1708	218	SLE	HF	-0.157547	-0.62545	0.28021	0.0248211	0	0.39272	0.447637
2413	20	49236419	50653620	2083	250	SLE	HF	-0.149973	-0.49547	0.18201	0.0224919	0	0.24819	0.362434
2447	21	32202240	33270272	1518	167	SLE	HF	-0.066408	-0.52113	0.3606	0.00441002	0	0.28889	0.746024
2449	21	34383795	35729261	1606	224	SLE	HF	-0.120047	-0.45084	0.20011	0.0144112	0	0.20408	0.443021
2450	21	35729262	37303548	2111	228	SLE	HF	0.226876	-0.21783	0.75477	0.0514727	0	0.57263	0.297923
2453	21	39252060	40480831	1637	226	SLE	HF	-0.402314	-0.9182	-0.01522	0.161857	0.00258	0.84309	0.0505846
2458	21	43812792	44815008	143	92	SLE	HF	0.401432	-0.0112	0.90417	0.161147	0	0.81752	0.0648193
2485	22	41722788	42867927	1142	121	SLE	HF	-0.508002	-1	-0.06968	0.258066	0.0072	1	0.025457
2488	22	44409534	45170649	1271	234	SLE	HF	0.0085348	-0.2888	0.30483	7.28428e-05	0	0.1183	0.95305
4	1	2983520	3582047	805	154	SLE	PAD	0.19408	-0.1898	0.60123	0.0376669	0	0.36161	0.304876
35	1	36855140	38474036	2150	221	SLE	PAD	-0.395259	-0.74405	-0.07645	0.15623	0.00641	0.55361	0.015302
48	1	55727135	56799636	1767	157	SLE	PAD	-0.256478	-0.68422	0.13527	0.0657811	0	0.46816	0.191758
53	1	61377616	62778733	1945	242	SLE	PAD	-0.482972	-0.97697	-0.0941	0.233262	0.01068	0.95447	0.0163926
155	1	201067953	202583884	2011	260	SLE	PAD	0.0987492	-0.18387	0.38718	0.00975141	0	0.15313	0.481206
156	1	202583885	204092537	1886	224	SLE	PAD	0.00354658	-0.29837	0.30203	1.25782e-05	0	0.12033	0.980672
160	1	208162952	209711169	1997	264	SLE	PAD	0.0493928	-0.31333	0.42028	0.00243965	0	0.18832	0.777215
221	2	15721704	17241115	2105	244	SLE	PAD	-0.390907	-0.84473	-0.02369	0.152809	0.00257	0.71357	0.0445481
312	2	119635490	121073752	1964	179	SLE	PAD	-0.0466361	-0.40365	0.32259	0.00217493	0	0.18409	0.791381
313	2	121073753	122026817	1234	176	SLE	PAD	-0.229211	-0.71656	0.19985	0.0525379	0	0.51511	0.285287
393	2	215899571	217566011	1977	243	SLE	PAD	0.0150857	-0.35578	0.3874	0.000227579	0	0.18338	0.932481
435	3	12859210	14312007	2171	250	SLE	PAD	0.149328	-0.175	0.4915	0.022299	0	0.24157	0.358834
441	3	20754843	21790867	1993	207	SLE	PAD	0.443141	0.05472	0.92019	0.196374	0.00528	0.84675	0.0262837
483	3	71223282	72334704	1401	252	SLE	PAD	0.284991	-0.06884	0.68924	0.0812197	0	0.47505	0.119358
539	3	133718494	135288394	2061	225	SLE	PAD	0.367643	0.03691	0.7636	0.135161	0.00293	0.58309	0.0359613
603	4	5972710	7135819	1713	268	SLE	PAD	0.206662	-0.14466	0.59478	0.0427093	0	0.35377	0.244226
604	4	7135820	7726034	1268	249	SLE	PAD	-0.235292	-0.6724	0.15749	0.0553621	0	0.45212	0.230671
638	4	37880861	38984838	1912	235	SLE	PAD	-0.446584	-0.82656	-0.11258	0.199437	0.01344	0.6832	0.00969317
765	4	182065647	182946258	1724	231	SLE	PAD	0.0148255	-0.41176	0.43824	0.000219797	0	0.2452	0.940075
768	4	184338585	185483262	1885	270	SLE	PAD	-0.248705	-0.51104	0.00334	0.0618543	0	0.26116	0.0525304
778	5	2106886	2960068	1643	214	SLE	PAD	0.244871	-0.18886	0.74718	0.0599616	0	0.55917	0.250101
804	5	31679465	32727914	1504	206	SLE	PAD	-0.404809	-0.85596	-0.02994	0.163871	0.00348	0.73267	0.0370885
849	5	87943483	89584466	1194	173	SLE	PAD	-0.5385	-0.97762	-0.19239	0.289982	0.03702	0.95574	0.00401374
898	5	148662215	149850203	1476	225	SLE	PAD	-0.12864	-0.52452	0.23477	0.0165483	0	0.27727	0.484855
918	5	170898341	172285682	1821	262	SLE	PAD	0.0675154	-0.30329	0.4405	0.00455832	0	0.20476	0.705674
939	6	16566883	17391994	1199	176	SLE	PAD	-0.301262	-0.76297	0.08766	0.0907589	0	0.58212	0.131952
952	6	27261036	28666364	1986	79	SLE	PAD	0.296985	0.02548	0.57816	0.0882003	0.00155	0.33427	0.0323062
1012	6	79859904	80693927	1312	144	SLE	PAD	-0.038769	-0.43556	0.3558	0.00150303	0	0.2162	0.835689
1127	7	28890887	30175113	2138	233	SLE	PAD	-0.0579348	-0.4284	0.30323	0.00335644	0	0.19697	0.741328
1213	7	136113468	137657459	1658	177	SLE	PAD	-0.314927	-0.84494	0.1317	0.0991791	0	0.71427	0.155553
1326	8	96175631	96900513	1250	176	SLE	PAD	0.389612	-0.0374	0.91222	0.151797	0	0.83214	0.0720958
1353	8	128073655	129291118	1898	262	SLE	PAD	-0.353602	-0.68608	-0.06829	0.125034	0.00557	0.47071	0.018086
1358	8	133461552	134509448	1665	212	SLE	PAD	-0.000778804	-0.36834	0.35808	6.06536e-07	0	0.17457	0.996404
1412	9	34704545	36749273	2210	237	SLE	PAD	0.528009	0.16271	0.98917	0.278793	0.02648	0.97845	0.00665978
1424	9	78630916	79451035	1339	214	SLE	PAD	-0.300896	-0.6988	0.07609	0.0905387	0	0.48832	0.0973397
1472	9	128785783	129617771	1124	197	SLE	PAD	-0.214031	-0.67326	0.18748	0.0458093	0	0.45328	0.283492
1476	9	132999453	134141936	1274	208	SLE	PAD	-0.127161	-0.62195	0.34104	0.0161699	0	0.40208	0.563427
1505	10	17065861	18529742	2076	197	SLE	PAD	0.393875	0.04796	0.78712	0.155138	0.00408	0.61956	0.0280149
1544	10	62626466	64069687	1993	176	SLE	PAD	0.140298	-0.21088	0.52744	0.0196835	0	0.28018	0.425025
1552	10	71050505	71672997	1206	203	SLE	PAD	-0.123156	-0.47382	0.20558	0.0151674	0	0.22602	0.454368
1559	10	79952997	81190573	1879	271	SLE	PAD	0.104655	-0.20738	0.42548	0.0109526	0	0.18206	0.500544
1603	10	129831970	130694008	1471	231	SLE	PAD	-0.316985	-0.74047	0.04554	0.100479	0	0.54829	0.0882826
1656	11	43949378	45019559	1651	245	SLE	PAD	0.660624	0.31431	1	0.436425	0.09879	1	0.000344811
1727	11	122589225	123398882	1224	181	SLE	PAD	-0.511376	-1	-0.11517	0.261506	0.0144	1	0.0122499
1731	11	126304241	127306871	1530	210	SLE	PAD	-0.0569614	-0.5237	0.39714	0.0032446	0	0.30533	0.786451
1732	11	127306872	128262550	1498	139	SLE	PAD	0.067597	-0.41272	0.57031	0.00456936	0	0.35963	0.767086
1733	11	128262551	129451784	983	189	SLE	PAD	-0.184655	-0.53641	0.15042	0.0340973	0	0.28774	0.263206
1839	12	109031820	110111514	1472	141	SLE	PAD	-0.107347	-0.56827	0.33201	0.0115234	0	0.33351	0.608673
1852	12	124843769	126079935	1855	264	SLE	PAD	0.562248	0.31078	0.85094	0.316123	0.09658	0.72409	3.88162e-05
1872	13	27392006	28587125	2060	218	SLE	PAD	-0.334441	-0.7903	0.04878	0.111851	0	0.62458	0.0854681
1945	13	107037865	108521978	2029	268	SLE	PAD	0.581668	0.29839	0.94372	0.338338	0.08904	0.89061	0.000163391
1948	13	109813577	110995432	2071	243	SLE	PAD	-0.0502396	-0.41227	0.303	0.00252402	0	0.18582	0.770366
1955	14	20876081	21982654	1428	260	SLE	PAD	0.0960932	-0.22368	0.43564	0.00923391	0	0.19116	0.543118
1965	14	32382246	33591113	1613	227	SLE	PAD	0.180842	-0.27596	0.69033	0.0327037	0	0.48103	0.414714
1966	14	33591114	34695195	1480	291	SLE	PAD	0.117199	-0.14804	0.39832	0.0137357	0	0.15881	0.391472
2002	14	72665320	73373373	1090	163	SLE	PAD	0.200449	-0.20419	0.64123	0.0401799	0	0.41117	0.313034
2021	14	94892241	95946792	2027	278	SLE	PAD	0.44379	0.09472	0.87138	0.19695	0.00991	0.7593	0.0156085
2022	14	95946793	97174314	2020	234	SLE	PAD	-0.222448	-0.56063	0.10298	0.0494831	0	0.31431	0.169591
2046	15	35118928	36583327	1914	195	SLE	PAD	0.0840427	-0.3573	0.53667	0.00706317	0	0.29893	0.689326
2067	15	62106139	63218978	1568	216	SLE	PAD	0.795792	0.46509	1	0.633284	0.21631	1	2.53827e-05
2092	15	92675406	93707010	1664	243	SLE	PAD	-0.0776904	-0.44427	0.27947	0.00603579	0	0.20499	0.658213
2093	15	93707011	94565521	1543	235	SLE	PAD	-0.347152	-0.78479	0.02166	0.120514	0	0.6159	0.0659552
2095	15	95662426	96864278	1473	223	SLE	PAD	0.11226	-0.21883	0.45802	0.0126023	0	0.21061	0.49574
2107	16	5782969	6446081	1141	225	SLE	PAD	0.107976	-0.27919	0.51432	0.0116587	0	0.27254	0.570511
2158	16	78280637	78973580	1816	247	SLE	PAD	0.179723	-0.12659	0.49742	0.0323004	0	0.24742	0.239271
2159	16	78973581	79662634	1246	249	SLE	PAD	-0.172759	-0.5385	0.18389	0.0298457	0	0.29083	0.325814
2162	16	81437862	82310204	1524	241	SLE	PAD	-0.16985	-0.6029	0.22101	0.028849	0	0.36426	0.384978
2167	16	85146806	86058597	1001	226	SLE	PAD	0.0610573	-0.20239	0.32795	0.003728	0	0.11036	0.640872
2210	17	47516225	48722590	1109	235	SLE	PAD	0.10561	-0.17209	0.3909	0.0111534	0	0.15401	0.449642
2226	17	69245591	70495119	1547	232	SLE	PAD	0.179185	-0.22629	0.61981	0.0321074	0	0.38434	0.373361
2227	17	70495120	71466953	1280	242	SLE	PAD	-0.0747437	-0.45585	0.30582	0.00558663	0	0.21953	0.681285
2318	19	10028841	11681978	1991	218	SLE	PAD	-0.199789	-0.61142	0.17511	0.0399156	0	0.37427	0.286728
2338	19	31763009	33028099	1549	185	SLE	PAD	0.0052627	-0.37442	0.38388	2.7696e-05	0	0.19211	0.97691
2340	19	33785836	34633274	1429	186	SLE	PAD	-0.634323	-1	-0.25854	0.402366	0.06684	1	0.00179132
2412	20	48212976	49236418	1426	166	SLE	PAD	0.120998	-0.25433	0.51174	0.0146405	0	0.26821	0.503143
2413	20	49236419	50653620	2078	248	SLE	PAD	0.275523	-0.04695	0.63911	0.0759128	0	0.40846	0.0989855
2449	21	34383795	35729261	1640	224	SLE	PAD	0.158988	-0.16263	0.50367	0.0252771	0	0.25368	0.327025
2471	22	26166935	27192923	1642	233	SLE	PAD	-0.0591263	-0.39444	0.28364	0.00349592	0	0.16685	0.719859
2472	22	27192924	27952441	1364	259	SLE	PAD	-0.275535	-0.69869	0.08907	0.0759195	0	0.48911	0.144771
2488	22	44409534	45170649	1293	232	SLE	PAD	-0.127757	-0.50495	0.24113	0.0163218	0	0.25853	0.466878
4	1	2983520	3582047	812	155	SLE	Stroke	0.350768	-0.01873	0.75744	0.123038	0	0.57371	0.0700789
11	1	8580988	9475966	1055	187	SLE	Stroke	-0.026545	-0.4978	0.41306	0.000704639	0	0.28821	0.89941
46	1	53114187	54771293	2341	207	SLE	Stroke	-0.26184	-0.68739	0.10417	0.0685601	0	0.4725	0.154985
58	1	67761891	68633860	1138	152	SLE	Stroke	-0.18704	-0.64632	0.20237	0.0349838	0	0.41773	0.339573
79	1	90941550	91870059	1321	143	SLE	Stroke	0.27328	-0.17826	0.78744	0.0746822	0	0.6204	0.225259
98	1	111134063	112489248	2339	244	SLE	Stroke	-0.200277	-0.63755	0.18129	0.040111	0	0.40703	0.292479
113	1	154685546	156813845	1632	204	SLE	Stroke	-0.121925	-0.51379	0.23232	0.0148656	0	0.26416	0.48612
117	1	159882516	161054076	1488	192	SLE	Stroke	-0.115439	-0.53985	0.27463	0.0133262	0	0.29516	0.538962
160	1	208162952	209711169	2024	269	SLE	Stroke	-0.132916	-0.53187	0.22744	0.0176665	0	0.28416	0.456341
184	1	234365797	235097113	1219	198	SLE	Stroke	0.417173	0.09239	0.77413	0.174033	0.00948	0.59927	0.0150428
186	1	236199672	237409458	1987	200	SLE	Stroke	0.0196986	-0.41153	0.42503	0.000388035	0	0.23891	0.921963
242	2	37603361	38887393	2013	225	SLE	Stroke	-0.162785	-0.61555	0.23806	0.0264989	0	0.37975	0.400413
251	2	45850048	46499326	1113	237	SLE	Stroke	0.155992	-0.16977	0.48091	0.0243335	0	0.23174	0.331196
268	2	60775067	62429910	1889	190	SLE	Stroke	-0.668553	-1	-0.26875	0.446963	0.07236	1	0.00187784
355	2	170865766	171566482	1188	174	SLE	Stroke	-0.00750362	-0.34263	0.32218	5.63043e-05	0	0.14474	0.963348
374	2	191051955	193033982	2252	207	SLE	Stroke	-0.146456	-0.41667	0.1076	0.0214493	0	0.17362	0.239791
383	2	205038120	206821199	1866	266	SLE	Stroke	-0.0823506	-0.52712	0.32772	0.00678162	0	0.28797	0.674915
393	2	215899571	217566011	2108	252	SLE	Stroke	0.330883	0.00751	0.68559	0.109483	0.00139	0.47003	0.0512111
412	2	235625790	236276287	1199	173	SLE	Stroke	-0.0251004	-0.54652	0.45891	0.000630032	0	0.34875	0.911567
424	3	2140012	3128152	1704	269	SLE	Stroke	0.084583	-0.27852	0.43677	0.00715429	0	0.19988	0.620629
441	3	20754843	21790867	2052	213	SLE	Stroke	0.174393	-0.16097	0.52101	0.0304129	0	0.27145	0.299491
457	3	36840137	38729767	2193	231	SLE	Stroke	-0.0451345	-0.55922	0.42729	0.00203713	0	0.34835	0.839116
483	3	71223282	72334704	1428	258	SLE	Stroke	0.138663	-0.27296	0.54979	0.0192275	0	0.30675	0.468846
551	3	148638309	149998411	2214	224	SLE	Stroke	0.102354	-0.191	0.40312	0.0104763	0	0.16323	0.492585
571	3	170174579	171134849	1208	167	SLE	Stroke	-0.294999	-0.77754	0.11051	0.0870242	0	0.60456	0.1457
573	3	172004761	173415591	1743	188	SLE	Stroke	-0.0576127	-0.5126	0.36255	0.00331922	0	0.28542	0.777643
581	3	183203156	184524268	1866	238	SLE	Stroke	0.060219	-0.34712	0.44757	0.00362633	0	0.22997	0.747871
584	3	186602046	187939199	1971	274	SLE	Stroke	-0.0972138	-0.43471	0.21963	0.00945053	0	0.19002	0.533766
601	4	4266179	5051834	1381	204	SLE	Stroke	-0.200393	-0.7374	0.254	0.0401575	0	0.54689	0.37115
619	4	20086839	21416380	2188	229	SLE	Stroke	-0.0781039	-0.48361	0.2922	0.00610022	0	0.24157	0.667752
638	4	37880861	38984838	1986	244	SLE	Stroke	-0.244577	-0.70929	0.14895	0.0598179	0	0.50449	0.201815
698	4	109978983	111733579	2257	212	SLE	Stroke	-0.00803887	-0.26878	0.25003	6.46235e-05	0	0.08876	0.949732
738	4	155044410	156520288	1939	182	SLE	Stroke	-0.097777	-0.41873	0.20858	0.00956034	0	0.1765	0.521731
739	4	156520289	157597309	2358	189	SLE	Stroke	-0.708414	-1	-0.35544	0.501851	0.12634	1	0.000296609
768	4	184338585	185483262	1922	274	SLE	Stroke	0.340745	0.05673	0.65231	0.116107	0.0044	0.42551	0.0222922
777	5	1206610	2106885	1602	221	SLE	Stroke	-0.250928	-0.62444	0.08945	0.0629648	0	0.38993	0.138972
782	5	5828695	6936733	2332	245	SLE	Stroke	0.116842	-0.21525	0.44919	0.0136521	0	0.20401	0.475146
804	5	31679465	32727914	1539	211	SLE	Stroke	-0.0822848	-0.39025	0.20688	0.00677079	0	0.1535	0.579159
809	5	37925488	39438985	1977	197	SLE	Stroke	0.100703	-0.35724	0.55523	0.0101412	0	0.32479	0.637865
881	5	124109486	125131720	1633	213	SLE	Stroke	-0.258076	-0.70314	0.10969	0.0666034	0	0.4944	0.17089
888	5	132554691	134556570	2436	284	SLE	Stroke	-0.368189	-0.72473	-0.07244	0.135563	0.00574	0.52523	0.0159909
889	5	134556571	135344943	1230	141	SLE	Stroke	0.195967	-0.29272	0.70089	0.0384032	0	0.50026	0.394515
893	5	141253831	142532956	1755	217	SLE	Stroke	-0.332695	-0.76828	0.03157	0.110686	0	0.59025	0.0708793
908	5	158484776	159663733	1711	190	SLE	Stroke	0.523571	0.20098	0.89339	0.274126	0.04039	0.79815	0.00236845
916	5	168342744	169506966	1975	231	SLE	Stroke	-0.381488	-0.93106	0.02247	0.145533	0	0.86687	0.0708158
918	5	170898341	172285682	1897	269	SLE	Stroke	-0.0584898	-0.40843	0.26595	0.00342106	0	0.17392	0.720314
920	5	173606996	174662885	1719	241	SLE	Stroke	-0.00251951	-0.37234	0.34949	6.34794e-06	0	0.17379	0.988249
926	6	63979	1380679	1844	258	SLE	Stroke	-0.217913	-0.51555	0.05073	0.0474859	0	0.2658	0.117749
927	6	1380680	2746531	1935	232	SLE	Stroke	-0.097383	-0.56304	0.32653	0.00948344	0	0.32515	0.636055
932	6	6621938	7808323	2020	263	SLE	Stroke	-0.26378	-0.64861	0.06612	0.0695799	0	0.42069	0.110579
937	6	13352327	15069421	1876	244	SLE	Stroke	-0.0899875	-0.49238	0.27087	0.00809774	0	0.24467	0.612791
938	6	15069422	16566882	2384	249	SLE	Stroke	-0.154653	-0.50671	0.17573	0.0239175	0	0.25679	0.340362
948	6	23939307	24950379	1909	204	SLE	Stroke	0.531557	0.19045	0.92422	0.282553	0.03641	0.85418	0.00349952
959	6	31250557	31320268	85	16	SLE	Stroke	0.415489	0.04709	0.80721	0.172631	0.00509	0.65158	0.0327118
967	6	32682214	32897998	319	54	SLE	Stroke	0.186509	-0.12718	0.52015	0.0347857	0	0.27138	0.230659
976	6	40778402	42103738	1911	246	SLE	Stroke	0.0668822	-0.26618	0.39624	0.00447323	0	0.1636	0.674515
1054	6	125365055	127545459	1946	192	SLE	Stroke	-0.29019	-0.80121	0.12417	0.0842103	0	0.64194	0.168134
1062	6	135544084	137553212	1723	188	SLE	Stroke	0.454212	0.02389	0.99112	0.206309	0.00374	0.9827	0.043175
1071	6	148184845	149278798	2028	249	SLE	Stroke	-0.0236026	-0.33106	0.26915	0.000557083	0	0.12556	0.872882
1078	6	154462011	155523957	1685	240	SLE	Stroke	0.094588	-0.2996	0.47028	0.0089469	0	0.23292	0.604037
1087	6	163336362	164687462	2271	237	SLE	Stroke	0.0972436	-0.23804	0.43745	0.00945631	0	0.19648	0.553582
1105	7	8718352	9225106	1131	172	SLE	Stroke	0.140493	-0.26879	0.53171	0.0197384	0	0.28656	0.459071
1116	7	16739014	17596578	1368	238	SLE	Stroke	-0.0900993	-0.43952	0.23568	0.00811789	0	0.19597	0.582501
1179	7	90660832	92530165	1567	155	SLE	Stroke	-0.153334	-0.56002	0.22505	0.0235112	0	0.3139	0.415311
1214	7	137657460	138755107	1506	222	SLE	Stroke	-0.26726	-0.61952	0.04972	0.0714279	0	0.3838	0.0995382
1227	7	154407488	155280610	1639	227	SLE	Stroke	-0.143015	-0.48006	0.1682	0.0204532	0	0.23086	0.362081
1235	8	1628040	2070902	796	207	SLE	Stroke	0.287139	-0.05178	0.65085	0.0824489	0	0.42361	0.0974252
1242	8	4893121	5566269	2010	221	SLE	Stroke	0.364207	0.01984	0.73451	0.132647	0.00215	0.53951	0.0380717
1244	8	6019164	6663427	1639	217	SLE	Stroke	0.233507	-0.08335	0.55203	0.0545255	0	0.30474	0.138185
1296	8	59555978	60476248	1150	142	SLE	Stroke	0.0829823	-0.29434	0.45261	0.00688607	0	0.21706	0.652897
1309	8	73838028	75011699	1728	193	SLE	Stroke	0.0633845	-0.33871	0.45963	0.00401759	0	0.2316	0.739862
1324	8	92876621	94999066	2057	236	SLE	Stroke	0.379954	0.03215	0.79521	0.144365	0.00268	0.63235	0.0348109
1326	8	96175631	96900513	1274	180	SLE	Stroke	0.358705	-0.05092	0.83187	0.12867	0	0.69201	0.0804717
1353	8	128073655	129291118	1954	272	SLE	Stroke	-0.0831535	-0.3738	0.20168	0.00691451	0	0.14023	0.554017
1443	9	97418634	98885862	1795	189	SLE	Stroke	0.663041	0.30421	1	0.439623	0.09254	1	0.00111916
1492	10	5396243	6234718	1564	225	SLE	Stroke	0.288925	-0.10157	0.71986	0.0834777	0	0.5182	0.143553
1544	10	62626466	64069687	2052	189	SLE	Stroke	0.257097	-0.08876	0.61681	0.0660987	0	0.38046	0.140174
1553	10	71672998	72659223	1954	236	SLE	Stroke	0.197606	-0.12127	0.52483	0.039048	0	0.27545	0.215257
1554	10	72659224	73514214	1537	239	SLE	Stroke	-0.152842	-0.54332	0.20675	0.0233605	0	0.2952	0.386428
1559	10	79952997	81190573	1919	277	SLE	Stroke	0.251023	-0.09481	0.61508	0.0630123	0	0.37832	0.148084
1589	10	114255955	115588903	1637	225	SLE	Stroke	0.00723264	-0.38898	0.38662	5.2311e-05	0	0.20428	0.968906
1623	11	11081300	11632650	1174	231	SLE	Stroke	0.109456	-0.36147	0.59719	0.0119805	0	0.37755	0.618088
1656	11	43949378	45019559	1685	255	SLE	Stroke	0.265312	-0.09418	0.64557	0.0703902	0	0.41676	0.137103
1744	12	3871115	4967643	1385	232	SLE	Stroke	0.0786061	-0.36653	0.52489	0.00617891	0	0.30416	0.705835
1764	12	23923799	25058714	1814	239	SLE	Stroke	0.295846	-0.03368	0.65122	0.0875246	0	0.42409	0.073735
1844	12	115439452	116197675	1206	199	SLE	Stroke	0.364267	-0.08047	0.86775	0.13269	0	0.75299	0.0989574
1866	13	21540734	22795188	1684	230	SLE	Stroke	0.171329	-0.1823	0.54148	0.0293536	0	0.29354	0.343719
1867	13	22795189	23729049	1960	239	SLE	Stroke	-0.220679	-0.74091	0.22252	0.0486993	0	0.55151	0.306672
1874	13	30068526	31433218	2290	239	SLE	Stroke	0.587119	0.25758	0.96954	0.344709	0.06635	0.94	0.000948576
1875	13	31433219	32986686	2186	229	SLE	Stroke	-0.00282477	-0.39292	0.37684	7.97931e-06	0	0.19684	0.987713
1887	13	43931932	45476446	1915	189	SLE	Stroke	0.0725408	-0.32752	0.47253	0.00526217	0	0.23771	0.708351
1937	13	98527336	99402294	1347	186	SLE	Stroke	0.102817	-0.28958	0.49056	0.0105713	0	0.24751	0.583256
1945	13	107037865	108521978	2069	276	SLE	Stroke	0.142265	-0.15016	0.43427	0.0202394	0	0.18906	0.326117
1948	13	109813577	110995432	2104	248	SLE	Stroke	0.233154	-0.05994	0.52382	0.0543606	0	0.27439	0.103095
1955	14	20876081	21982654	1455	266	SLE	Stroke	0.114751	-0.20731	0.44371	0.0131678	0	0.20227	0.46354
1958	14	23985937	24906056	1021	154	SLE	Stroke	-0.17552	-0.58609	0.20061	0.0308071	0	0.3435	0.345209
1963	14	29029225	30831154	1859	222	SLE	Stroke	0.464352	0.14549	0.8329	0.215622	0.02167	0.69373	0.00688491
1966	14	33591114	34695195	1525	298	SLE	Stroke	-0.194702	-0.56943	0.1347	0.0379089	0	0.32581	0.249684
1988	14	56206431	57460781	1927	218	SLE	Stroke	-0.3321	-0.81312	0.04438	0.110291	0	0.66117	0.0895288
1999	14	68976913	69794542	1354	197	SLE	Stroke	0.244975	-0.13071	0.64717	0.0600125	0	0.41883	0.192104
2019	14	92101229	93386328	2072	237	SLE	Stroke	0.298939	-0.05547	0.67961	0.0893648	0	0.46214	0.0974502
2021	14	94892241	95946792	2069	285	SLE	Stroke	-0.0439274	-0.39174	0.27251	0.00192961	0	0.15988	0.783844
2023	14	97174315	98268391	1579	191	SLE	Stroke	-0.434246	-0.96151	-0.03713	0.18857	0.00342	0.9245	0.0346137
2047	15	36583328	37962915	1980	237	SLE	Stroke	0.0390953	-0.37554	0.42672	0.00152844	0	0.21709	0.836795
2066	15	61130596	62106138	1480	252	SLE	Stroke	0.202989	-0.22099	0.65642	0.0412045	0	0.43326	0.332239
2072	15	69089816	70767983	2035	250	SLE	Stroke	-0.0962731	-0.47591	0.23609	0.0092685	0	0.23004	0.569126
2076	15	74458114	76401952	1856	163	SLE	Stroke	0.16334	-0.26818	0.59735	0.02668	0	0.35852	0.436571
2093	15	93707011	94565521	1554	240	SLE	Stroke	0.00171283	-0.40838	0.39132	2.93378e-06	0	0.21238	0.992796
2095	15	95662426	96864278	1538	232	SLE	Stroke	-0.0724583	-0.4197	0.25411	0.0052502	0	0.18165	0.653903
2124	16	24014706	25235251	1511	224	SLE	Stroke	-0.357978	-0.71173	-0.05425	0.128148	0.00397	0.50657	0.0234996
2133	16	50467034	52041336	193	125	SLE	Stroke	0.0680574	-0.28172	0.39846	0.00463181	0	0.16848	0.686782
2158	16	78280637	78973580	1878	251	SLE	Stroke	-0.190445	-0.59605	0.15769	0.0362692	0	0.35534	0.279682
2159	16	78973581	79662634	1292	255	SLE	Stroke	-0.0714617	-0.49016	0.311	0.00510678	0	0.2478	0.706025
2167	16	85146806	86058597	1021	230	SLE	Stroke	-0.0238427	-0.27056	0.21449	0.000568477	0	0.08124	0.842767
2180	17	6305079	7264458	1154	212	SLE	Stroke	0.075322	-0.28806	0.43353	0.00567341	0	0.19788	0.665298
2188	17	14508611	15308722	1716	209	SLE	Stroke	-0.425618	-0.84322	-0.10162	0.181151	0.01131	0.71101	0.012865
2202	17	36116885	37361178	966	161	SLE	Stroke	-0.264459	-0.62996	0.058	0.0699385	0	0.39684	0.109957
2209	17	45883902	47516224	2399	193	SLE	Stroke	-0.167301	-0.53793	0.17184	0.0279898	0	0.28956	0.322048
2210	17	47516225	48722590	1210	240	SLE	Stroke	0.0961017	-0.16432	0.35934	0.00923553	0	0.12974	0.468207
2216	17	54950108	56245227	1456	253	SLE	Stroke	-0.562278	-1	-0.19995	0.316156	0.04	1	0.00382729
2226	17	69245591	70495119	1585	238	SLE	Stroke	-0.261803	-0.72286	0.13429	0.068541	0	0.52252	0.186445
2227	17	70495120	71466953	1289	245	SLE	Stroke	-0.119168	-0.53788	0.25468	0.0142011	0	0.29233	0.52517
2243	18	4603962	5575812	1499	181	SLE	Stroke	0.40542	0.03532	0.80924	0.164365	0.00361	0.65486	0.0336201
2245	18	6756497	7862479	1438	208	SLE	Stroke	-0.00929263	-0.35132	0.31299	8.63529e-05	0	0.14839	0.953972
2262	18	28792735	30401128	2145	198	SLE	Stroke	-0.187009	-0.57617	0.17391	0.0349724	0	0.33197	0.299454
2274	18	45718493	46558306	1309	237	SLE	Stroke	0.0255549	-0.35036	0.38894	0.000653052	0	0.18619	0.885681
2276	18	47455926	48228379	1234	165	SLE	Stroke	0.177955	-0.30662	0.67532	0.0316681	0	0.46357	0.430402
2287	18	58527237	59449422	1176	166	SLE	Stroke	0.369615	-0.07711	0.90655	0.136615	0	0.82492	0.104301
2297	18	69311743	70540349	2165	206	SLE	Stroke	-0.0586403	-0.44002	0.29482	0.00343868	0	0.20495	0.734122
2318	19	10028841	11681978	2020	225	SLE	Stroke	-0.086709	-0.37717	0.18211	0.00751845	0	0.14246	0.530594
2353	19	46765061	47752727	1103	161	SLE	Stroke	-0.313971	-0.76187	0.06034	0.098578	0	0.58045	0.102933
2372	20	2668109	3736551	1442	177	SLE	Stroke	0.132681	-0.34945	0.63093	0.0176042	0	0.41813	0.55655
2410	20	46486133	47203836	1018	166	SLE	Stroke	0.367944	0.01131	0.75896	0.135382	0.00184	0.57602	0.0461789
2449	21	34383795	35729261	1687	235	SLE	Stroke	-0.0986915	-0.51059	0.27726	0.00974	0	0.26886	0.597048
2453	21	39252060	40480831	1714	231	SLE	Stroke	-0.0888289	-0.47206	0.26951	0.00789057	0	0.22689	0.614992
2472	22	27192924	27952441	1392	264	SLE	Stroke	-0.18324	-0.57084	0.16935	0.0335768	0	0.32632	0.292361
2483	22	38718590	40378783	1809	194	SLE	Stroke	0.181856	-0.24897	0.63696	0.0330715	0	0.40747	0.384226
9	1	6136815	7711794	2115	232	T1D	AF	-0.188621	-0.55355	0.15966	0.0355779	0	0.30765	0.275261
12	1	9475967	10753427	1461	129	T1D	AF	-0.242466	-0.68208	0.1721	0.0587895	0	0.46536	0.230858
35	1	36855140	38474036	2176	229	T1D	AF	-0.365917	-0.83018	0.01011	0.133895	0	0.6892	0.0609806
95	1	107874654	109271449	1915	180	T1D	AF	0.00633435	-0.45297	0.44853	4.0124e-05	0	0.27361	0.976045
98	1	111134063	112489248	2333	244	T1D	AF	0.0409472	-0.22718	0.31479	0.00167668	0	0.1067	0.76031
101	1	114664388	116207297	2419	212	T1D	AF	0.28813	0.02728	0.56797	0.083019	0.0017	0.32259	0.0362181
113	1	154685546	156813845	1630	203	T1D	AF	-0.26374	-0.48474	-0.06033	0.0695588	0.0038	0.23497	0.011395
129	1	171044256	172465153	2247	172	T1D	AF	0.0712161	-0.33358	0.49097	0.00507174	0	0.25405	0.713231
156	1	202583885	204092537	1909	227	T1D	AF	-0.128005	-0.42357	0.15559	0.0163853	0	0.17966	0.369058
159	1	205917549	208162951	1754	193	T1D	AF	-0.0130694	-0.3429	0.31273	0.000170808	0	0.14801	0.933859
179	1	230227248	231287764	2187	246	T1D	AF	-0.240109	-0.67362	0.13506	0.0576522	0	0.45721	0.205374
228	2	24669225	25895394	1336	141	T1D	AF	0.185997	-0.21502	0.62777	0.0345949	0	0.39428	0.353052
232	2	29627933	30575619	1391	173	T1D	AF	0.23566	-0.19987	0.7348	0.0555355	0	0.53994	0.278651
267	2	59251997	60775066	2099	262	T1D	AF	0.194231	-0.07571	0.47453	0.0377256	0	0.22517	0.163866
268	2	60775067	62429910	1885	189	T1D	AF	0.0133244	-0.28766	0.32021	0.000177539	0	0.12332	0.928433
313	2	121073753	122026817	1255	179	T1D	AF	-0.06565	-0.40704	0.26708	0.00430993	0	0.17267	0.686454
381	2	202504863	203639686	1181	135	T1D	AF	0.310112	-0.07575	0.74546	0.0961694	0	0.55571	0.115815
478	3	65326752	66702084	1748	230	T1D	AF	0.00793741	-0.37774	0.39027	6.30025e-05	0	0.20519	0.96565
481	3	68319771	69784969	2326	224	T1D	AF	-0.15029	-0.53016	0.2162	0.0225872	0	0.28343	0.402194
483	3	71223282	72334704	1424	258	T1D	AF	0.0516715	-0.28145	0.38404	0.00266994	0	0.16101	0.750505
579	3	179372166	181424323	1975	181	T1D	AF	-0.182596	-0.7005	0.26733	0.0333414	0	0.49679	0.404041
584	3	186602046	187939199	1967	273	T1D	AF	-0.0175371	-0.32378	0.29252	0.00030755	0	0.13052	0.907437
603	4	5972710	7135819	1741	273	T1D	AF	0.232374	-0.0955	0.5889	0.0539979	0	0.3468	0.156532
638	4	37880861	38984838	1963	242	T1D	AF	0.127827	-0.21566	0.48975	0.0163397	0	0.24063	0.452354
756	4	174470207	175295842	1085	160	T1D	AF	-0.515738	-0.85897	-0.22458	0.265986	0.05044	0.73783	0.00145542
785	5	9203856	10549029	1887	249	T1D	AF	-0.0423873	-0.39237	0.30285	0.00179669	0	0.16967	0.799263
893	5	141253831	142532956	1749	217	T1D	AF	-0.390771	-0.8766	-0.00237	0.152702	0.00216	0.76842	0.0540948
918	5	170898341	172285682	1869	268	T1D	AF	-0.285068	-0.55739	-0.03349	0.0812635	0.00185	0.31068	0.0308076
919	5	172285683	173606995	1974	239	T1D	AF	-0.147801	-0.39835	0.08779	0.0218451	0	0.15869	0.214787
927	6	1380680	2746531	1933	232	T1D	AF	-0.00727651	-0.3852	0.35605	5.29476e-05	0	0.18676	0.967562
928	6	2746532	3964072	1873	243	T1D	AF	-0.256396	-0.59387	0.05482	0.0657389	0	0.35268	0.107916
931	6	5378214	6621937	1944	265	T1D	AF	0.199657	-0.13947	0.5604	0.0398629	0	0.31464	0.237429
932	6	6621938	7808323	2017	262	T1D	AF	-0.312414	-0.63315	-0.0176	0.0976026	0.00142	0.40087	0.042261
936	6	11790672	13352326	2189	218	T1D	AF	0.211531	-0.16408	0.61648	0.0447455	0	0.38007	0.255092
951	6	26396201	27261035	998	66	T1D	AF	-0.0244527	-0.33616	0.28951	0.000597936	0	0.13651	0.869823
961	6	31427210	32208901	582	101	T1D	AF	-0.0100865	-0.23967	0.21595	0.000101737	0	0.06792	0.927262
972	6	36346354	37570051	1935	224	T1D	AF	0.0472326	-0.25599	0.35356	0.00223091	0	0.13463	0.7536
976	6	40778402	42103738	1903	245	T1D	AF	0.120469	-0.23311	0.49291	0.0145129	0	0.24643	0.487586
978	6	43770627	44596897	1124	220	T1D	AF	0.133585	-0.21912	0.50211	0.0178448	0	0.25359	0.449181
1053	6	123854858	125365054	1931	235	T1D	AF	0.051275	-0.32597	0.43544	0.00262913	0	0.21082	0.778698
1078	6	154462011	155523957	1674	238	T1D	AF	-0.0595894	-0.39398	0.26731	0.0035509	0	0.16354	0.707521
1087	6	163336362	164687462	2262	236	T1D	AF	0.302857	-0.09484	0.77065	0.0917224	0	0.5939	0.133385
1116	7	16739014	17596578	1367	239	T1D	AF	0.278488	-0.13898	0.74559	0.0775555	0	0.5559	0.175991
1125	7	25671576	27351286	2409	222	T1D	AF	0.144182	-0.16843	0.46066	0.0207885	0	0.2125	0.348682
1126	7	27351287	28890886	2126	251	T1D	AF	0.162074	-0.14323	0.48786	0.026268	0	0.238	0.285837
1147	7	50894509	51951647	1488	170	T1D	AF	-0.157423	-0.54731	0.20714	0.024782	0	0.30118	0.38302
1208	7	128779174	130418704	2141	211	T1D	AF	-0.0629623	-0.51389	0.35238	0.00396426	0	0.28135	0.758221
1241	8	4273084	4893120	1616	260	T1D	AF	0.0928144	-0.28228	0.48487	0.00861452	0	0.24101	0.609175
1353	8	128073655	129291118	1952	272	T1D	AF	0.184712	-0.06952	0.45251	0.0341185	0	0.20476	0.153061
1358	8	133461552	134509448	1689	217	T1D	AF	-0.172138	-0.65501	0.26429	0.0296317	0	0.432	0.415651
1376	9	4025356	4596614	907	199	T1D	AF	-0.203673	-0.55676	0.12959	0.0414827	0	0.30998	0.212656
1412	9	34704545	36749273	2290	244	T1D	AF	0.519218	0.22086	0.85775	0.269588	0.04878	0.73574	0.000987561
1446	9	101596751	103165725	1616	173	T1D	AF	0.428414	0.06758	0.86529	0.183539	0.0063	0.74873	0.0225603
1472	9	128785783	129617771	1164	209	T1D	AF	-0.151757	-0.55096	0.2177	0.0230303	0	0.3051	0.417397
1492	10	5396243	6234718	1564	225	T1D	AF	0.204413	-0.0184	0.44111	0.0417845	0	0.19458	0.0695205
1493	10	6234719	6897037	1058	183	T1D	AF	0.389189	-0.00812	0.88172	0.151468	0	0.77743	0.0673168
1545	10	64069688	65400431	1999	150	T1D	AF	-0.0675848	-0.51356	0.36021	0.00456771	0	0.28622	0.742765
1552	10	71050505	71672997	1240	209	T1D	AF	0.401888	0.04993	0.83644	0.161514	0.00405	0.69963	0.0294994
1555	10	73514215	75694023	1946	117	T1D	AF	-0.0446451	-0.41538	0.31578	0.00199319	0	0.19185	0.799619
1559	10	79952997	81190573	1910	276	T1D	AF	-0.0201401	-0.27157	0.2307	0.000405625	0	0.08787	0.873226
1587	10	112164982	113117615	1341	199	T1D	AF	0.285386	-0.15388	0.80788	0.0814453	0	0.65267	0.188094
1589	10	114255955	115588903	1625	224	T1D	AF	-0.17039	-0.49991	0.14689	0.0290329	0	0.24991	0.276014
1612	11	1857846	2477449	852	128	T1D	AF	-0.112182	-0.37524	0.13278	0.0125847	0	0.14107	0.358288
1727	11	122589225	123398882	1235	185	T1D	AF	-0.170488	-0.57673	0.20313	0.0290663	0	0.33526	0.354887
1733	11	128262551	129451784	1004	196	T1D	AF	0.154708	-0.07296	0.38558	0.0239345	0	0.14867	0.183215
1743	12	3069507	3871114	1397	224	T1D	AF	-0.142153	-0.57407	0.27818	0.0202073	0	0.33766	0.48203
1744	12	3871115	4967643	1381	231	T1D	AF	-0.0161719	-0.34981	0.30432	0.000261531	0	0.14405	0.91933
1764	12	23923799	25058714	1812	239	T1D	AF	-0.128879	-0.36645	0.09823	0.0166097	0	0.13429	0.271092
1765	12	25058715	25990813	1606	180	T1D	AF	0.354605	-0.04832	0.80885	0.125745	0	0.65424	0.0827836
1794	12	56987106	58748139	1636	155	T1D	AF	0.269168	-0.05924	0.62348	0.0724514	0	0.38872	0.108615
1803	12	68006683	68839661	1252	172	T1D	AF	0.332477	-0.11454	0.87759	0.110541	0	0.77186	0.140462
1804	12	68839662	70097805	2023	214	T1D	AF	-0.28386	-0.61919	0.02061	0.0805767	0	0.3834	0.0692181
1841	12	111592382	113947983	2142	168	T1D	AF	0.253161	0.00467	0.52251	0.0640904	0.00093	0.27302	0.0455298
1844	12	115439452	116197675	1203	198	T1D	AF	-0.111358	-0.40752	0.18418	0.0124006	0	0.16707	0.448414
1852	12	124843769	126079935	1908	267	T1D	AF	-0.159992	-0.53155	0.16568	0.0255974	0	0.28317	0.334149
1933	13	93285143	94925136	2342	210	T1D	AF	0.303965	0.01438	0.61336	0.0923946	0.00155	0.37621	0.0416312
1937	13	98527336	99402294	1347	186	T1D	AF	-0.140263	-0.54666	0.24144	0.0196737	0	0.30309	0.455899
1957	14	22760701	23985936	1507	236	T1D	AF	-0.0341818	-0.33299	0.25053	0.00116839	0	0.12101	0.80946
1963	14	29029225	30831154	1856	221	T1D	AF	0.0477967	-0.33297	0.4492	0.00228453	0	0.22135	0.796631
1965	14	32382246	33591113	1627	231	T1D	AF	0.182174	-0.06713	0.43964	0.0331872	0	0.19328	0.142149
1999	14	68976913	69794542	1352	197	T1D	AF	-0.379607	-0.68964	-0.10321	0.144102	0.01075	0.47561	0.00955863
2000	14	69794543	71140426	2152	186	T1D	AF	-0.479204	-0.9383	-0.10707	0.229637	0.01264	0.8804	0.0142903
2002	14	72665320	73373373	1172	169	T1D	AF	0.443959	0.08724	0.88575	0.1971	0.00832	0.78455	0.0193351
2017	14	89482884	90662836	1539	202	T1D	AF	-0.131471	-0.61601	0.3224	0.0172847	0	0.38414	0.539903
2019	14	92101229	93386328	2070	236	T1D	AF	0.386578	-0.01759	0.87076	0.149443	0	0.76261	0.0625804
2020	14	93386329	94892240	2502	248	T1D	AF	0.15959	-0.19994	0.52854	0.0254689	0	0.27985	0.362988
2027	14	100786190	102004377	1532	242	T1D	AF	-0.0510932	-0.33488	0.22961	0.00261052	0	0.12041	0.710228
2038	15	25384328	26392947	1748	248	T1D	AF	0.013073	-0.38275	0.40911	0.000170902	0	0.21175	0.944222
2048	15	37962916	39238840	1713	210	T1D	AF	-0.0474164	-0.47186	0.36241	0.00224832	0	0.24675	0.808088
2055	15	47693317	49260006	1560	159	T1D	AF	0.202762	-0.15921	0.59358	0.0411122	0	0.35254	0.274097
2072	15	69089816	70767983	2032	250	T1D	AF	-0.271586	-0.58467	0.01688	0.0737591	0	0.34184	0.0650776
2088	15	88035758	89385187	1475	235	T1D	AF	0.274796	-0.09913	0.7039	0.0755128	0	0.49548	0.141715
2093	15	93707011	94565521	1553	240	T1D	AF	0.163556	-0.25831	0.60858	0.0267505	0	0.37166	0.419296
2126	16	26154123	27443061	2037	274	T1D	AF	0.272497	-0.0609	0.64381	0.0742544	0	0.4145	0.0996686
2127	16	27443062	29043177	1038	156	T1D	AF	0.0027712	-0.29978	0.29041	7.67956e-06	0	0.11678	0.984763
2162	16	81437862	82310204	1581	245	T1D	AF	-0.165799	-0.52163	0.16585	0.0274894	0	0.27255	0.323699
2175	17	1480057	2699135	1274	198	T1D	AF	0.103454	-0.24108	0.4527	0.0107027	0	0.20851	0.544097
2203	17	37361179	38880481	1531	109	T1D	AF	-0.897126	-1	-0.57164	0.804835	0.32677	1	9.79366e-06
2205	17	40233546	42348003	1941	171	T1D	AF	-0.0982238	-0.45537	0.2375	0.00964791	0	0.21005	0.559003
2216	17	54950108	56245227	1455	253	T1D	AF	0.144518	-0.1242	0.4155	0.0208855	0	0.17299	0.28165
2231	17	74908267	75619256	1224	190	T1D	AF	-0.52137	-1	-0.11844	0.271827	0.01486	1	0.0147799
2246	18	7862480	8788524	1490	200	T1D	AF	0.123289	-0.26677	0.53769	0.0152002	0	0.29511	0.524591
2274	18	45718493	46558306	1308	237	T1D	AF	0.000181436	-0.30014	0.30004	3.2919e-08	0	0.12097	0.998993
2301	18	73568261	74471745	1666	212	T1D	AF	0.631827	0.31219	1	0.399205	0.09746	1	0.000230967
2318	19	10028841	11681978	2014	223	T1D	AF	0.138744	-0.22307	0.51346	0.0192498	0	0.26531	0.432776
2355	19	48573066	49415189	1215	139	T1D	AF	0.425292	0.08217	0.8146	0.180873	0.00826	0.66357	0.0171801
2357	19	50451926	51259178	849	148	T1D	AF	0.118024	-0.29489	0.53759	0.0139297	0	0.29898	0.54847
2370	20	884242	1771285	1402	210	T1D	AF	-0.233883	-0.53834	0.05738	0.0547012	0	0.28981	0.110264
2449	21	34383795	35729261	1679	234	T1D	AF	0.255753	-0.14539	0.69985	0.0654095	0	0.4898	0.193643
2450	21	35729262	37303548	2177	238	T1D	AF	0.235523	-0.02307	0.50556	0.0554711	0	0.25559	0.0708039
2459	21	44815009	46045433	71	52	T1D	AF	-0.218426	-0.68599	0.22243	0.0477098	0	0.47234	0.318359
2471	22	26166935	27192923	1673	238	T1D	AF	-0.524512	-0.98909	-0.15687	0.275112	0.02473	0.97829	0.00646548
2472	22	27192924	27952441	1388	264	T1D	AF	-0.105732	-0.55415	0.3058	0.0111792	0	0.31314	0.595204
2474	22	29457602	30962255	2024	174	T1D	AF	0.0448081	-0.31262	0.41065	0.00200776	0	0.18765	0.795447
2482	22	37364005	38718589	1757	224	T1D	AF	0.246238	-0.06286	0.5903	0.0606332	0	0.34845	0.116028
2483	22	38718590	40378783	1809	194	T1D	AF	-0.145887	-0.48815	0.19181	0.0212831	0	0.23856	0.384019
2489	22	45170650	46351048	1505	222	T1D	AF	0.104354	-0.26237	0.48548	0.0108898	0	0.23938	0.563718
4	1	2983520	3582047	812	155	T1D	CAD	-0.0383952	-0.41616	0.32003	0.00147419	0	0.19409	0.829242
12	1	9475967	10753427	1462	129	T1D	CAD	0.0415093	-0.36732	0.4337	0.00172302	0	0.22509	0.829136
27	1	25885139	27992665	1901	159	T1D	CAD	0.312703	-0.131	0.8006	0.0977832	0	0.64096	0.154303
29	1	29188427	30405182	1411	188	T1D	CAD	0.180912	-0.21277	0.59116	0.0327292	0	0.35212	0.342848
35	1	36855140	38474036	2176	229	T1D	CAD	-0.669509	-1	-0.37471	0.448242	0.1404	1	2.8195e-05
98	1	111134063	112489248	2334	244	T1D	CAD	-0.147085	-0.53458	0.20757	0.021634	0	0.28602	0.405121
100	1	113418038	114664387	1301	141	T1D	CAD	0.671366	0.50198	0.86162	0.450732	0.25198	0.74239	5.22873e-12
101	1	114664388	116207297	2419	212	T1D	CAD	0.30942	0.0729	0.55019	0.0957406	0.00543	0.30271	0.0107529
113	1	154685546	156813845	1630	203	T1D	CAD	-0.238586	-0.62967	0.11197	0.0569234	0	0.39648	0.180157
129	1	171044256	172465153	2248	173	T1D	CAD	0.346727	-0.03192	0.76347	0.12022	0	0.58289	0.0714467
156	1	202583885	204092537	1909	227	T1D	CAD	0.245709	-0.17585	0.71697	0.0603729	0	0.51435	0.236689
159	1	205917549	208162951	1755	194	T1D	CAD	-0.275119	-0.57167	0.00311	0.0756904	0	0.3268	0.0542864
179	1	230227248	231287764	2189	246	T1D	CAD	-0.187684	-0.65166	0.21822	0.0352251	0	0.42527	0.351725
217	2	11995766	12732506	1218	202	T1D	CAD	-0.117296	-0.58376	0.31212	0.0137584	0	0.34686	0.574776
221	2	15721704	17241115	2128	249	T1D	CAD	-0.0909354	-0.48845	0.27912	0.00826924	0	0.24292	0.616245
232	2	29627933	30575619	1396	173	T1D	CAD	0.179517	-0.21334	0.59412	0.0322263	0	0.35388	0.354713
234	2	31457419	33123604	1939	183	T1D	CAD	0.229964	-0.15963	0.63642	0.0528834	0	0.40503	0.229776
267	2	59251997	60775066	2100	262	T1D	CAD	0.375938	0.13207	0.64013	0.141329	0.01744	0.40977	0.00408323
336	2	145977921	147252196	1347	128	T1D	CAD	0.398726	0.00956	0.82448	0.158982	0.00225	0.67976	0.0440426
381	2	202504863	203639686	1181	135	T1D	CAD	-0.0563491	-0.35903	0.23372	0.00317522	0	0.1343	0.696928
382	2	203639687	205038119	1526	123	T1D	CAD	0.018783	-0.13783	0.17626	0.000352801	0	0.03487	0.812124
438	3	16084006	17182494	1813	212	T1D	CAD	0.0593738	-0.28997	0.3961	0.00352525	0	0.16856	0.728373
464	3	47588462	50387742	1511	114	T1D	CAD	0.331525	-0.0439	0.74566	0.109909	0	0.55653	0.0827704
483	3	71223282	72334704	1424	258	T1D	CAD	-0.0973749	-0.44175	0.22341	0.00948186	0	0.19565	0.539272
580	3	181424324	183203155	1692	188	T1D	CAD	-0.0446237	-0.45136	0.33292	0.00199128	0	0.22761	0.808417
584	3	186602046	187939199	1970	274	T1D	CAD	0.14523	-0.17536	0.46535	0.0210916	0	0.21879	0.352665
610	4	10370667	11050119	1247	134	T1D	CAD	0.0507499	-0.45404	0.53679	0.00257555	0	0.34337	0.822167
638	4	37880861	38984838	1966	243	T1D	CAD	0.325413	0.05211	0.61842	0.105894	0.00362	0.38244	0.0222491
727	4	139553761	141087047	1701	225	T1D	CAD	0.532731	0.23462	0.87147	0.283802	0.05505	0.75947	0.00099415
756	4	174470207	175295842	1096	160	T1D	CAD	-0.00432664	-0.42242	0.40637	1.87198e-05	0	0.23031	0.982135
781	5	4636543	5828694	2096	239	T1D	CAD	0.146303	-0.27196	0.57644	0.0214045	0	0.33807	0.468674
785	5	9203856	10549029	1887	249	T1D	CAD	0.0117568	-0.39459	0.40561	0.000138222	0	0.21841	0.950929
809	5	37925488	39438985	1966	195	T1D	CAD	-0.420464	-0.90052	-0.03768	0.17679	0.00363	0.81093	0.0341009
819	5	52139774	52837225	1345	116	T1D	CAD	-0.143847	-0.65863	0.32099	0.0206919	0	0.44418	0.51938
832	5	65606871	67096191	2078	188	T1D	CAD	0.374057	-0.02311	0.85459	0.139919	0	0.73032	0.0675133
881	5	124109486	125131720	1631	213	T1D	CAD	0.0265888	-0.352	0.3938	0.000706964	0	0.18677	0.880397
887	5	130573818	132554690	1785	117	T1D	CAD	-0.591471	-0.97297	-0.27848	0.349838	0.07755	0.94666	0.000598207
888	5	132554691	134556570	2432	283	T1D	CAD	0.169804	-0.29452	0.66707	0.0288335	0	0.44811	0.439332
893	5	141253831	142532956	1754	217	T1D	CAD	-0.082468	-0.42354	0.25013	0.00680097	0	0.18317	0.618125
916	5	168342744	169506966	1971	230	T1D	CAD	0.361325	0.01847	0.74668	0.130555	0.0021	0.55753	0.042904
919	5	172285683	173606995	1974	239	T1D	CAD	0.162458	-0.15242	0.48855	0.0263927	0	0.23898	0.308904
926	6	63979	1380679	1842	258	T1D	CAD	0.219206	-0.08855	0.53478	0.0480512	0	0.28599	0.158937
927	6	1380680	2746531	1934	232	T1D	CAD	-0.00823643	-0.30101	0.27419	6.78388e-05	0	0.11024	0.954047
931	6	5378214	6621937	1944	265	T1D	CAD	-0.392323	-0.83733	-0.02659	0.153917	0.00294	0.70112	0.0378123
936	6	11790672	13352326	2190	218	T1D	CAD	-0.142012	-0.35567	0.06105	0.0201675	0	0.1265	0.171038
943	6	19449153	20418020	1411	187	T1D	CAD	-0.233204	-0.67312	0.15283	0.054384	0	0.45336	0.230659
948	6	23939307	24950379	1898	203	T1D	CAD	-0.170419	-0.58116	0.1921	0.0290425	0	0.34053	0.352974
952	6	27261036	28666364	2013	82	T1D	CAD	-0.465869	-0.72321	-0.24007	0.217034	0.05763	0.52303	0.000124351
953	6	28666365	29529755	197	46	T1D	CAD	-0.197776	-0.55219	0.12916	0.0391155	0	0.30491	0.227225
957	6	30715007	31106493	249	60	T1D	CAD	-0.0551445	-0.3305	0.22345	0.00304091	0	0.11659	0.684277
958	6	31106494	31250556	183	34	T1D	CAD	-0.110682	-0.36428	0.1375	0.0122506	0	0.13278	0.367086
959	6	31250557	31320268	85	16	T1D	CAD	-0.12329	-0.474	0.2121	0.0152004	0	0.22532	0.453893
960	6	31320269	31427209	241	33	T1D	CAD	0.0400803	-0.212	0.28949	0.00160643	0	0.09118	0.750262
961	6	31427210	32208901	582	101	T1D	CAD	0.171178	-0.01286	0.35537	0.0293019	0	0.12629	0.0652746
964	6	32539568	32586784	40	9	T1D	CAD	0.629196	0.37924	0.87053	0.395887	0.14382	0.75782	0.000123474
965	6	32586785	32629239	29	12	T1D	CAD	-0.0527061	-0.443	0.3178	0.00277793	0	0.21217	0.767096
970	6	33864263	34979270	1569	143	T1D	CAD	0.0929968	-0.14933	0.33056	0.0086484	0	0.11011	0.427795
971	6	34979271	36346353	1732	176	T1D	CAD	-0.0292338	-0.33747	0.27397	0.000854618	0	0.12796	0.847239
972	6	36346354	37570051	1936	224	T1D	CAD	-0.0438515	-0.36879	0.2647	0.00192296	0	0.14448	0.772372
976	6	40778402	42103738	1907	246	T1D	CAD	-0.292371	-0.66477	0.03925	0.085481	0	0.44191	0.0846498
978	6	43770627	44596897	1124	220	T1D	CAD	0.00380552	-0.30398	0.30972	1.4482e-05	0	0.12804	0.979778
1022	6	89974268	91097024	1304	173	T1D	CAD	0.0838547	-0.26222	0.42996	0.00703161	0	0.19435	0.622217
1054	6	125365055	127545459	1946	192	T1D	CAD	-0.361199	-0.77012	-0.01406	0.130464	0.00215	0.59309	0.0430383
1067	6	143083348	144791455	2034	243	T1D	CAD	-0.0672893	-0.41737	0.26244	0.00452785	0	0.17889	0.679095
1078	6	154462011	155523957	1678	239	T1D	CAD	0.168047	-0.26618	0.64557	0.0282399	0	0.41833	0.428991
1087	6	163336362	164687462	2262	236	T1D	CAD	-0.215207	-0.66215	0.16961	0.0463141	0	0.43844	0.267924
1119	7	20122180	21390644	2067	249	T1D	CAD	0.215665	-0.10355	0.54563	0.0465113	0	0.29772	0.176192
1199	7	116835337	118342090	1886	133	T1D	CAD	0.311359	-0.01478	0.64959	0.0969444	0	0.42197	0.0570432
1208	7	128779174	130418704	2144	212	T1D	CAD	-0.269811	-0.68569	0.08913	0.0727978	0	0.47017	0.139381
1209	7	130418705	131856481	1909	245	T1D	CAD	0.304542	0.01462	0.60829	0.0927457	0.0015	0.37001	0.0387989
1244	8	6019164	6663427	1637	217	T1D	CAD	-0.0516265	-0.49531	0.36318	0.0026653	0	0.26572	0.795258
1293	8	56346879	57436722	1752	150	T1D	CAD	0.322637	-0.06195	0.75591	0.104095	0	0.57253	0.104863
1353	8	128073655	129291118	1952	272	T1D	CAD	-0.20612	-0.5114	0.06693	0.0424856	0	0.26153	0.138333
1359	8	134509449	135313673	1651	216	T1D	CAD	-0.420476	-0.78223	-0.11006	0.1768	0.0125	0.61189	0.010832
1395	9	18754197	19463292	1344	162	T1D	CAD	0.160749	-0.22857	0.5697	0.0258402	0	0.32511	0.396784
1462	9	117054910	117989017	1402	175	T1D	CAD	-0.174729	-0.69287	0.28732	0.0305304	0	0.48231	0.430277
1506	10	18529743	19421514	1824	163	T1D	CAD	0.241531	-0.2102	0.75028	0.0583372	0	0.5654	0.271949
1512	10	24489448	25577761	1290	203	T1D	CAD	-0.156145	-0.54945	0.20087	0.0243812	0	0.30463	0.384818
1521	10	32457294	33655458	2339	134	T1D	CAD	0.527054	0.15134	0.98765	0.277786	0.02331	0.97545	0.00844255
1544	10	62626466	64069687	2051	188	T1D	CAD	0.250438	-0.11552	0.64549	0.0627194	0	0.41725	0.163484
1545	10	64069688	65400431	1999	150	T1D	CAD	-0.148609	-0.6451	0.29303	0.0220847	0	0.41971	0.490991
1555	10	73514215	75694023	1950	117	T1D	CAD	0.210282	-0.2275	0.67815	0.0442187	0	0.46089	0.320855
1559	10	79952997	81190573	1914	276	T1D	CAD	-0.112345	-0.35593	0.12366	0.0126215	0	0.12669	0.351764
1569	10	89971629	91021321	1590	193	T1D	CAD	-0.0822517	-0.31416	0.14927	0.00676534	0	0.09889	0.482298
1589	10	114255955	115588903	1634	224	T1D	CAD	-0.00257123	-0.38247	0.37093	6.61122e-06	0	0.19215	0.988724
1597	10	123856185	124894142	1738	210	T1D	CAD	-0.471937	-0.84535	-0.18386	0.222724	0.0338	0.71462	0.00225618
1601	10	127997709	129134738	1379	206	T1D	CAD	0.342857	-0.10626	0.85902	0.117551	0	0.73791	0.120842
1603	10	129831970	130694008	1490	237	T1D	CAD	0.452438	0.12829	0.82603	0.2047	0.01678	0.68233	0.007763
1671	11	60515106	61717117	1150	159	T1D	CAD	-0.0384155	-0.40124	0.31825	0.00147575	0	0.17526	0.825222
1712	11	103495636	104875270	1964	137	T1D	CAD	0.0590238	-0.21355	0.3329	0.00348381	0	0.11635	0.665428
1718	11	111117781	112755446	1715	163	T1D	CAD	0.369535	0.03294	0.74158	0.136556	0.00279	0.54994	0.0349946
1723	11	117295642	118901213	2332	262	T1D	CAD	0.0678313	-0.21256	0.34108	0.00460108	0	0.11913	0.616438
1729	11	124403478	125266684	1133	183	T1D	CAD	-0.584021	-1	-0.1876	0.341081	0.0352	1	0.00556557
1733	11	128262551	129451784	1004	196	T1D	CAD	0.087441	-0.2167	0.39333	0.00764593	0	0.15803	0.560014
1741	12	1078398	1942426	1415	147	T1D	CAD	-0.094003	-0.55378	0.33064	0.00883656	0	0.32025	0.64577
1742	12	1942427	3069506	1513	195	T1D	CAD	-0.222246	-0.66312	0.16271	0.0493932	0	0.43973	0.247109
1744	12	3871115	4967643	1381	231	T1D	CAD	-0.268636	-0.69005	0.09884	0.0721652	0	0.47617	0.139143
1746	12	6023701	6948954	1188	152	T1D	CAD	-0.091308	-0.47985	0.28004	0.00833714	0	0.23396	0.613362
1764	12	23923799	25058714	1812	239	T1D	CAD	-0.00761776	-0.31396	0.29576	5.80303e-05	0	0.12521	0.959783
1794	12	56987106	58748139	1636	155	T1D	CAD	0.123716	-0.25335	0.5213	0.0153055	0	0.27639	0.508254
1804	12	68839662	70097805	2023	214	T1D	CAD	0.694671	0.34684	1	0.482568	0.1203	1	0.000389811
1840	12	110111515	111592381	1428	132	T1D	CAD	0.55092	0.27268	0.85699	0.303513	0.07436	0.73442	0.000426947
1841	12	111592382	113947983	2143	168	T1D	CAD	0.886441	0.75662	1	0.785777	0.57248	1	5.65204e-22
1844	12	115439452	116197675	1203	198	T1D	CAD	-0.178175	-0.57498	0.18507	0.0317465	0	0.3306	0.313917
1852	12	124843769	126079935	1910	267	T1D	CAD	-0.0929426	-0.31815	0.12352	0.00863833	0	0.10122	0.404001
1873	13	28587126	30068525	2072	200	T1D	CAD	-0.198796	-0.55222	0.12245	0.0395199	0	0.30495	0.221509
1885	13	42037055	42950157	1477	128	T1D	CAD	-0.0507961	-0.44396	0.3181	0.00258024	0	0.21305	0.782205
1937	13	98527336	99402294	1347	186	T1D	CAD	-0.147539	-0.55589	0.23708	0.0217678	0	0.31064	0.441365
1938	13	99402295	100470868	1823	163	T1D	CAD	0.0564404	-0.40881	0.52215	0.00318552	0	0.31206	0.796447
1948	13	109813577	110995432	2103	248	T1D	CAD	0.199205	-0.0509	0.48436	0.0396828	0	0.23461	0.121789
1963	14	29029225	30831154	1856	221	T1D	CAD	0.652189	0.31966	1	0.425351	0.10218	1	0.000310724
1965	14	32382246	33591113	1627	231	T1D	CAD	-0.0222511	-0.37975	0.30585	0.000495109	0	0.16203	0.893031
1999	14	68976913	69794542	1354	197	T1D	CAD	0.312141	0.00997	0.64368	0.097432	0.0015	0.41432	0.047607
2000	14	69794543	71140426	2155	187	T1D	CAD	-0.143199	-0.53907	0.2296	0.020506	0	0.2907	0.43696
2002	14	72665320	73373373	1173	169	T1D	CAD	-0.201886	-0.66584	0.21577	0.0407579	0	0.44661	0.329365
2020	14	93386329	94892240	2502	248	T1D	CAD	0.613844	0.24724	1	0.376805	0.06113	1	0.00176623
2026	14	99474534	100786189	1674	211	T1D	CAD	0.288822	0.03805	0.56405	0.083418	0.00225	0.31815	0.0289546
2027	14	100786190	102004377	1533	242	T1D	CAD	0.181675	-0.11846	0.49561	0.0330059	0	0.24563	0.234095
2038	15	25384328	26392947	1734	249	T1D	CAD	0.262445	-0.16815	0.75719	0.0688774	0	0.57472	0.217359
2044	15	33484268	34410072	1839	220	T1D	CAD	-0.0445861	-0.50976	0.38471	0.00198792	0	0.3019	0.830975
2048	15	37962916	39238840	1712	210	T1D	CAD	0.347905	0.0237	0.69892	0.121038	0.00234	0.48849	0.0362563
2055	15	47693317	49260006	1561	159	T1D	CAD	-0.269786	-0.74188	0.14341	0.0727842	0	0.55039	0.187689
2071	15	67396521	69089815	1996	207	T1D	CAD	-0.594131	-0.94423	-0.3239	0.352991	0.10491	0.89157	4.68491e-05
2072	15	69089816	70767983	2034	250	T1D	CAD	-0.5352	-0.96957	-0.18495	0.286439	0.03421	0.94007	0.00311112
2079	15	78514102	79292536	1011	129	T1D	CAD	-0.174561	-0.36523	0.01279	0.0304716	0	0.13339	0.069947
2088	15	88035758	89385187	1481	236	T1D	CAD	0.042519	-0.42279	0.5139	0.00180786	0	0.30825	0.843117
2153	16	74889128	75525959	1118	112	T1D	CAD	-0.79227	-1	-0.48447	0.627692	0.23472	1	8.24797e-06
2162	16	81437862	82310204	1582	245	T1D	CAD	0.0893926	-0.18665	0.36515	0.00799104	0	0.1346	0.51088
2167	16	85146806	86058597	1021	230	T1D	CAD	0.376303	0.05484	0.71526	0.141604	0.00454	0.51159	0.0185754
2175	17	1480057	2699135	1275	199	T1D	CAD	0.103404	-0.15819	0.35683	0.0106924	0	0.12747	0.421018
2180	17	6305079	7264458	1152	212	T1D	CAD	0.0575263	-0.32986	0.43679	0.00330928	0	0.20565	0.755892
2195	17	25872111	27344401	1150	184	T1D	CAD	0.00512798	-0.40487	0.39846	2.62961e-05	0	0.22249	0.978855
2205	17	40233546	42348003	1941	171	T1D	CAD	0.370391	0.09314	0.67494	0.13719	0.00909	0.45554	0.0119917
2209	17	45883902	47516224	2397	193	T1D	CAD	-0.00543679	-0.28419	0.2751	2.95587e-05	0	0.10354	0.967993
2210	17	47516225	48722590	1169	241	T1D	CAD	0.207364	-0.2444	0.70165	0.0429997	0	0.49446	0.337391
2216	17	54950108	56245227	1456	253	T1D	CAD	0.231168	-0.06418	0.55278	0.0534385	0	0.30556	0.1294
2241	18	2839843	3722828	1130	189	T1D	CAD	-0.125679	-0.61933	0.31467	0.0157951	0	0.38727	0.557571
2251	18	12735559	13641479	1342	181	T1D	CAD	0.0792212	-0.14853	0.30861	0.00627599	0	0.09568	0.494561
2274	18	45718493	46558306	1308	237	T1D	CAD	-0.282109	-0.67473	0.05808	0.0795856	0	0.45526	0.102916
2295	18	67195981	68051035	1343	156	T1D	CAD	0.0411804	-0.43717	0.52731	0.00169582	0	0.33004	0.852953
2315	19	7249360	8199016	1142	157	T1D	CAD	0.733437	0.38139	1	0.53793	0.14546	1	0.000210439
2318	19	10028841	11681978	2017	223	T1D	CAD	0.21021	-0.00801	0.43787	0.0441884	0	0.19173	0.057477
2327	19	18504868	19749166	1296	129	T1D	CAD	-0.0771195	-0.40361	0.23637	0.00594741	0	0.16714	0.622612
2353	19	46765061	47752727	1096	161	T1D	CAD	-0.555545	-0.88922	-0.27174	0.30863	0.07384	0.79071	0.000286349
2370	20	884242	1771285	1402	210	T1D	CAD	-0.223245	-0.59957	0.10281	0.0498381	0	0.35948	0.175305
2380	20	10279604	11257012	1538	187	T1D	CAD	0.32722	-0.01985	0.70136	0.107073	0	0.49191	0.0656749
2387	20	16661517	17359290	1248	157	T1D	CAD	0.145175	-0.35344	0.65472	0.0210759	0	0.44911	0.526665
2388	20	17359291	18058524	1251	178	T1D	CAD	0.28875	-0.13552	0.76279	0.0833767	0	0.58185	0.172258
2413	20	49236419	50653620	2134	253	T1D	CAD	-0.112576	-0.44021	0.20078	0.0126734	0	0.19491	0.468624
2449	21	34383795	35729261	1679	234	T1D	CAD	-0.428123	-0.76971	-0.16489	0.183289	0.02719	0.59246	0.00195516
2450	21	35729262	37303548	2177	238	T1D	CAD	-0.0739177	-0.48542	0.32144	0.00546383	0	0.24805	0.70091
2457	21	43081435	43812791	230	143	T1D	CAD	-0.317469	-0.73485	0.04403	0.100786	0	0.54	0.0887115
2458	21	43812792	44815008	144	92	T1D	CAD	-0.123273	-0.48494	0.21416	0.0151962	0	0.2361	0.46334
2472	22	27192924	27952441	1389	264	T1D	CAD	0.161514	-0.2333	0.58638	0.0260868	0	0.34543	0.406797
2474	22	29457602	30962255	2025	174	T1D	CAD	-0.0669351	-0.37896	0.24047	0.00448031	0	0.1494	0.660239
2482	22	37364005	38718589	1758	225	T1D	CAD	-0.22311	-0.52199	0.05208	0.0497783	0	0.27247	0.114407
2489	22	45170650	46351048	1505	222	T1D	CAD	0.317753	-0.03357	0.72273	0.100967	0	0.52234	0.0867956
14	1	11709174	13481025	1341	159	T1D	VTE	-0.0346605	-0.512	0.43249	0.00120135	0	0.30901	0.875531
27	1	25885139	27992665	1889	159	T1D	VTE	-0.202351	-0.69831	0.25078	0.0409461	0	0.49146	0.357763
98	1	111134063	112489248	2324	243	T1D	VTE	-0.330062	-0.6717	-0.02225	0.108941	0.00186	0.45118	0.0396902
101	1	114664388	116207297	2408	212	T1D	VTE	0.117975	-0.22737	0.486	0.0139182	0	0.23889	0.480433
104	1	118118668	119408888	1766	158	T1D	VTE	-0.206694	-0.50468	0.08311	0.0427225	0	0.2547	0.160944
113	1	154685546	156813845	1622	202	T1D	VTE	0.000144303	-0.29405	0.30461	2.08233e-08	0	0.11687	0.999207
125	1	167163955	168179086	1258	171	T1D	VTE	-0.541739	-1	-0.15737	0.293482	0.02521	1	0.00773731
156	1	202583885	204092537	1891	226	T1D	VTE	0.15946	-0.22322	0.57308	0.0254274	0	0.32914	0.398532
159	1	205917549	208162951	1746	192	T1D	VTE	0.224418	0.00746	0.44395	0.0503634	0.00059	0.1971	0.0444992
179	1	230227248	231287764	2179	245	T1D	VTE	-0.0771713	-0.50245	0.32048	0.00595541	0	0.26605	0.682191
228	2	24669225	25895394	1330	140	T1D	VTE	0.426142	-0.00661	0.96948	0.181597	0	0.93989	0.0551238
234	2	31457419	33123604	1929	182	T1D	VTE	-0.00463056	-0.43231	0.42842	2.1442e-05	0	0.2551	0.981791
250	2	45189469	45850047	1020	189	T1D	VTE	-0.388099	-0.90117	0.03678	0.150621	0	0.81211	0.0694643
267	2	59251997	60775066	2087	261	T1D	VTE	0.219586	-0.09804	0.55666	0.048218	0	0.30987	0.160676
359	2	174118390	174927563	1128	169	T1D	VTE	-0.394485	-0.91268	0.02954	0.155618	0	0.83299	0.0690642
449	3	28649811	29877022	2308	240	T1D	VTE	-0.0159484	-0.49742	0.45639	0.000254352	0	0.31837	0.942344
462	3	44141694	45844191	2124	208	T1D	VTE	0.136839	-0.30148	0.60366	0.0187249	0	0.37448	0.515905
471	3	58557719	59998583	1928	218	T1D	VTE	-0.145842	-0.51629	0.20191	0.02127	0	0.26865	0.399324
483	3	71223282	72334704	1419	256	T1D	VTE	0.0453124	-0.30552	0.39845	0.00205322	0	0.1735	0.787483
532	3	125992651	127495173	2352	217	T1D	VTE	0.386126	0.0907	0.72199	0.149093	0.00852	0.52126	0.0129241
584	3	186602046	187939199	1958	272	T1D	VTE	0.110454	-0.21771	0.46932	0.0122002	0	0.22196	0.501452
603	4	5972710	7135819	1735	273	T1D	VTE	-0.205703	-0.51156	0.07653	0.0423139	0	0.26169	0.1615
624	4	25832019	27385580	1555	214	T1D	VTE	0.239963	-0.07652	0.57357	0.0575823	0	0.32899	0.137696
638	4	37880861	38984838	1950	241	T1D	VTE	0.146651	-0.15948	0.45478	0.0215066	0	0.20707	0.323117
727	4	139553761	141087047	1694	224	T1D	VTE	-0.0556366	-0.39108	0.27119	0.00309543	0	0.16617	0.730374
756	4	174470207	175295842	1092	158	T1D	VTE	0.404862	0.05415	0.80503	0.163913	0.00487	0.64807	0.0264206
808	5	36431968	37925487	1759	170	T1D	VTE	-0.290548	-0.76993	0.11797	0.0844183	0	0.5928	0.153893
809	5	37925488	39438985	1944	195	T1D	VTE	0.193713	-0.19391	0.60793	0.0375248	0	0.36958	0.309718
881	5	124109486	125131720	1623	211	T1D	VTE	-0.257102	-0.62663	0.0865	0.0661015	0	0.39266	0.133602
887	5	130573818	132554690	1777	117	T1D	VTE	-0.368893	-0.7671	-0.00927	0.136082	0.00175	0.58844	0.0470881
888	5	132554691	134556570	2415	281	T1D	VTE	0.00622126	-0.40499	0.42483	3.87041e-05	0	0.23419	0.974644
917	5	169506967	170898340	1880	215	T1D	VTE	-0.306163	-0.73263	0.07517	0.093736	0	0.53675	0.112599
918	5	170898341	172285682	1856	266	T1D	VTE	-0.281197	-0.5734	-0.00136	0.0790718	0.0011	0.32878	0.0473629
931	6	5378214	6621937	1930	264	T1D	VTE	-0.20211	-0.57671	0.1496	0.0408484	0	0.3326	0.240387
932	6	6621938	7808323	2010	262	T1D	VTE	-0.130006	-0.44124	0.17096	0.0169017	0	0.1947	0.38471
937	6	13352327	15069421	1860	240	T1D	VTE	0.0553162	-0.2973	0.41022	0.00305988	0	0.18021	0.748033
943	6	19449153	20418020	1398	183	T1D	VTE	-0.177677	-0.59451	0.21371	0.031569	0	0.35361	0.35762
949	6	24950380	25684629	1675	157	T1D	VTE	-0.128916	-0.33612	0.07938	0.0166194	0	0.11298	0.230702
950	6	25684630	26396200	1364	90	T1D	VTE	-0.217205	-0.44918	0.01413	0.0471778	0	0.20176	0.061789
953	6	28666365	29529755	196	46	T1D	VTE	-0.108834	-0.40009	0.17728	0.0118448	0	0.16189	0.446994
954	6	29529756	29833843	242	31	T1D	VTE	-0.204495	-0.51704	0.09063	0.0418181	0	0.26733	0.174442
955	6	29833844	30070717	25	11	T1D	VTE	-0.229932	-0.52211	0.07376	0.0528686	0	0.2726	0.125428
956	6	30070718	30715006	27	15	T1D	VTE	-0.770403	-1	-0.44796	0.59352	0.20067	1	0.000300072
957	6	30715007	31106493	249	60	T1D	VTE	0.00325354	-0.18102	0.18777	1.05855e-05	0	0.04335	0.971669
958	6	31106494	31250556	183	34	T1D	VTE	0.0800405	-0.12741	0.28347	0.00640648	0	0.08115	0.443389
959	6	31250557	31320268	85	16	T1D	VTE	0.285693	0.08144	0.48882	0.0816204	0.00675	0.23895	0.00847994
960	6	31320269	31427209	234	32	T1D	VTE	0.0817768	-0.09383	0.25931	0.00668744	0	0.06725	0.367935
961	6	31427210	32208901	581	100	T1D	VTE	-0.057912	-0.23206	0.11557	0.0033538	0	0.05462	0.51226
965	6	32586785	32629239	29	12	T1D	VTE	-0.143651	-0.49006	0.20754	0.0206357	0	0.24162	0.400085
970	6	33864263	34979270	1561	142	T1D	VTE	0.275556	0.042	0.53322	0.0759313	0.00239	0.28432	0.0220189
971	6	34979271	36346353	1728	175	T1D	VTE	-0.219815	-0.62651	0.14557	0.0483186	0	0.39314	0.241327
972	6	36346354	37570051	1925	223	T1D	VTE	-0.092179	-0.39751	0.20593	0.00849697	0	0.15996	0.534486
976	6	40778402	42103738	1901	245	T1D	VTE	-0.149537	-0.49879	0.18441	0.0223613	0	0.24927	0.363012
1063	6	137553213	138825721	2104	199	T1D	VTE	-0.0508763	-0.44603	0.33278	0.0025884	0	0.21713	0.782105
1067	6	143083348	144791455	2021	241	T1D	VTE	0.113984	-0.21216	0.46147	0.0129924	0	0.21386	0.479872
1126	7	27351287	28890886	2117	249	T1D	VTE	0.212388	-0.14478	0.60753	0.0451088	0	0.3691	0.236546
1147	7	50894509	51951647	1483	169	T1D	VTE	0.389535	-0.01391	0.88428	0.151737	0	0.78195	0.0580435
1209	7	130418705	131856481	1891	242	T1D	VTE	0.153775	-0.17657	0.50739	0.0236466	0	0.25778	0.34943
1244	8	6019164	6663427	1619	216	T1D	VTE	-0.0510432	-0.47563	0.35287	0.0026054	0	0.24748	0.792221
1268	8	22895019	23788494	1683	195	T1D	VTE	0.149988	-0.16169	0.46856	0.0224964	0	0.21955	0.331863
1293	8	56346879	57436722	1745	149	T1D	VTE	0.12181	-0.27085	0.5408	0.0148376	0	0.29952	0.5183
1353	8	128073655	129291118	1945	270	T1D	VTE	0.0352995	-0.23169	0.30276	0.00124605	0	0.1017	0.786914
1358	8	133461552	134509448	1677	216	T1D	VTE	-0.146476	-0.56836	0.2615	0.0214551	0	0.32567	0.453165
1412	9	34704545	36749273	2288	244	T1D	VTE	0.293616	-0.047	0.68825	0.0862101	0	0.47368	0.0900698
1495	10	7659873	8771920	2163	246	T1D	VTE	0.291685	-0.02093	0.66401	0.0850801	0	0.44091	0.0815377
1544	10	62626466	64069687	2040	187	T1D	VTE	0.0555172	-0.42178	0.54572	0.00308216	0	0.34395	0.801349
1552	10	71050505	71672997	1237	209	T1D	VTE	-0.0407577	-0.29476	0.20274	0.00166119	0	0.09284	0.735917
1559	10	79952997	81190573	1903	276	T1D	VTE	-0.169559	-0.43679	0.08916	0.0287502	0	0.19078	0.193989
1603	10	129831970	130694008	1483	237	T1D	VTE	0.216618	-0.08904	0.54785	0.0469234	0	0.30014	0.163416
1624	11	11632651	12470449	1498	227	T1D	VTE	-0.056287	-0.49587	0.36301	0.00316823	0	0.26632	0.779288
1646	11	33905328	34672697	1148	149	T1D	VTE	-0.405449	-0.92514	0.01606	0.164389	0	0.85588	0.0640088
1671	11	60515106	61717117	1144	157	T1D	VTE	0.0110418	-0.30079	0.32414	0.000121922	0	0.12771	0.942059
1678	11	69713997	71242834	2435	243	T1D	VTE	-0.249207	-0.7109	0.16253	0.0621043	0	0.50573	0.220557
1718	11	111117781	112755446	1711	161	T1D	VTE	-0.00707846	-0.43699	0.41909	5.01046e-05	0	0.24734	0.972154
1733	11	128262551	129451784	1000	194	T1D	VTE	-0.287454	-0.51084	-0.0678	0.0826295	0.00477	0.26096	0.0124247
1743	12	3069507	3871114	1386	222	T1D	VTE	-0.0882636	-0.5114	0.31619	0.00779047	0	0.27	0.652084
1744	12	3871115	4967643	1374	230	T1D	VTE	-0.519768	-0.95518	-0.16884	0.270159	0.02852	0.91237	0.00519789
1746	12	6023701	6948954	1181	152	T1D	VTE	-0.040702	-0.29159	0.20925	0.00165666	0	0.08838	0.739243
1749	12	8760629	10176713	361	125	T1D	VTE	0.0290865	-0.28948	0.35334	0.000846026	0	0.14594	0.855223
1764	12	23923799	25058714	1807	238	T1D	VTE	0.0432049	-0.34891	0.44713	0.00186667	0	0.23028	0.820706
1803	12	68006683	68839661	1245	170	T1D	VTE	0.15507	-0.28134	0.63394	0.0240466	0	0.40439	0.473234
1804	12	68839662	70097805	2014	214	T1D	VTE	0.204565	-0.14448	0.58845	0.0418467	0	0.34627	0.250688
1841	12	111592382	113947983	2134	167	T1D	VTE	0.840897	0.67786	1	0.707107	0.4595	1	3.22634e-15
1852	12	124843769	126079935	1897	265	T1D	VTE	0.020049	-0.32359	0.37037	0.000401961	0	0.16611	0.903077
1873	13	28587126	30068525	2063	199	T1D	VTE	-0.214991	-0.71127	0.23114	0.0462212	0	0.50591	0.327031
1945	13	107037865	108521978	2052	274	T1D	VTE	-0.37741	-0.77895	-0.03406	0.142439	0.00311	0.60676	0.0325001
1957	14	22760701	23985936	1500	235	T1D	VTE	0.0218499	-0.31558	0.3615	0.000477419	0	0.15305	0.893756
1963	14	29029225	30831154	1843	219	T1D	VTE	0.313245	-0.01495	0.66852	0.0981224	0	0.44691	0.0588109
2019	14	92101229	93386328	2057	235	T1D	VTE	0.241376	-0.07282	0.57879	0.0582625	0	0.335	0.122436
2020	14	93386329	94892240	2493	246	T1D	VTE	-0.0807281	-0.3978	0.22257	0.00651702	0	0.1604	0.590529
2026	14	99474534	100786189	1668	211	T1D	VTE	0.0217819	-0.36572	0.40467	0.00047445	0	0.20011	0.906188
2027	14	100786190	102004377	1520	240	T1D	VTE	-0.0404525	-0.38414	0.29678	0.0016364	0	0.16697	0.803111
2038	15	25384328	26392947	1743	246	T1D	VTE	0.0872964	-0.33771	0.54475	0.00762067	0	0.30757	0.67975
2071	15	67396521	69089815	1988	206	T1D	VTE	-0.157889	-0.6429	0.27519	0.0249289	0	0.41764	0.460187
2126	16	26154123	27443061	2026	274	T1D	VTE	0.414855	0.15292	0.70283	0.172104	0.02338	0.49397	0.00256173
2128	16	29043178	31384210	1115	115	T1D	VTE	0.257667	-0.15238	0.74278	0.0663924	0	0.55172	0.222996
2153	16	74889128	75525959	1103	111	T1D	VTE	0.60319	0.25715	1	0.363838	0.06613	1	0.00171323
2160	16	79662635	80559685	1859	213	T1D	VTE	-0.752162	-1	-0.37634	0.565747	0.14163	1	0.000316086
2162	16	81437862	82310204	1574	245	T1D	VTE	0.0525717	-0.19319	0.30668	0.00276379	0	0.09692	0.662343
2167	16	85146806	86058597	1009	228	T1D	VTE	-0.158202	-0.46649	0.15786	0.0250277	0	0.21762	0.302072
2175	17	1480057	2699135	1269	198	T1D	VTE	0.135037	-0.13441	0.41992	0.0182349	0	0.17669	0.324024
2180	17	6305079	7264458	1141	209	T1D	VTE	0.512159	0.21536	0.85394	0.262307	0.04638	0.72922	0.00120059
2198	17	31318754	32356061	1709	233	T1D	VTE	-0.00374222	-0.36635	0.36364	1.40042e-05	0	0.17713	0.983092
2209	17	45883902	47516224	2387	191	T1D	VTE	0.0371122	-0.31798	0.40188	0.00137731	0	0.18306	0.832375
2210	17	47516225	48722590	1160	241	T1D	VTE	0.0826699	-0.26385	0.44665	0.00683432	0	0.20427	0.627084
2231	17	74908267	75619256	1217	189	T1D	VTE	0.357985	0.01885	0.75922	0.128153	0.002	0.57642	0.0443942
2274	18	45718493	46558306	1302	236	T1D	VTE	-0.316505	-0.76965	0.06773	0.100175	0	0.59236	0.104295
2297	18	69311743	70540349	2155	205	T1D	VTE	0.0296067	-0.38228	0.44405	0.000876558	0	0.23316	0.878847
2301	18	73568261	74471745	1656	212	T1D	VTE	-0.496761	-0.89983	-0.16689	0.246771	0.02812	0.80969	0.00493912
2318	19	10028841	11681978	2009	223	T1D	VTE	-0.0209994	-0.25288	0.2106	0.000440975	0	0.07262	0.852653
2324	19	16079007	17045963	1230	117	T1D	VTE	-0.142605	-0.6029	0.29845	0.0203361	0	0.36801	0.496199
2327	19	18504868	19749166	1292	129	T1D	VTE	0.0903726	-0.32464	0.51258	0.00816721	0	0.27039	0.650696
2340	19	33785836	34633274	1496	187	T1D	VTE	-0.237104	-0.72645	0.17875	0.0562183	0	0.5283	0.265274
2353	19	46765061	47752727	1089	160	T1D	VTE	-0.189761	-0.56231	0.15637	0.0360094	0	0.31718	0.261041
2355	19	48573066	49415189	1209	138	T1D	VTE	0.635597	0.33597	0.98811	0.403983	0.11287	0.97635	0.000155835
2385	20	15238520	15962576	1154	175	T1D	VTE	-0.157882	-0.62127	0.28606	0.0249267	0	0.39209	0.45194
2415	20	51533751	52411532	940	198	T1D	VTE	0.254157	-0.15228	0.72427	0.0645959	0	0.52457	0.218081
2449	21	34383795	35729261	1671	234	T1D	VTE	-0.988766	-1	-0.60121	0.977658	0.36145	1	5.88241e-06
2450	21	35729262	37303548	2169	236	T1D	VTE	-0.124553	-0.54255	0.28096	0.0155135	0	0.29976	0.519074
2452	21	38046450	39252059	1944	193	T1D	VTE	0.391376	0.01134	0.831	0.153175	0.00205	0.69056	0.0424644
2457	21	43081435	43812791	230	143	T1D	VTE	0.31656	-0.01865	0.68956	0.10021	0	0.4755	0.0693712
2482	22	37364005	38718589	1751	224	T1D	VTE	-0.0516868	-0.34237	0.22976	0.00267153	0	0.12179	0.714195
26	1	23907046	25885138	1945	208	T1D	HF	-0.0194645	-0.37562	0.32367	0.000378867	0	0.16399	0.907919
101	1	114664388	116207297	2373	209	T1D	HF	0.0666158	-0.28641	0.42162	0.00443767	0	0.18616	0.69938
125	1	167163955	168179086	1226	168	T1D	HF	-0.115117	-0.58089	0.31099	0.0132519	0	0.34329	0.581332
159	1	205917549	208162951	1702	188	T1D	HF	0.287552	-0.00907	0.63486	0.0826864	0	0.40304	0.0686132
221	2	15721704	17241115	2027	247	T1D	HF	-0.331734	-0.79717	0.05078	0.110048	0	0.63547	0.0833168
427	3	4835084	5496182	817	179	T1D	HF	0.451389	0.05345	0.9387	0.203752	0.00562	0.88116	0.0292909
478	3	65326752	66702084	1702	225	T1D	HF	-0.330604	-0.85576	0.09029	0.109299	0	0.73232	0.11851
481	3	68319771	69784969	2234	219	T1D	HF	-0.160757	-0.59138	0.2416	0.0258428	0	0.35055	0.41219
584	3	186602046	187939199	1909	265	T1D	HF	-0.180724	-0.48191	0.10579	0.032661	0	0.23224	0.211029
603	4	5972710	7135819	1684	270	T1D	HF	0.00275643	-0.35027	0.34833	7.59792e-06	0	0.16261	0.986958
638	4	37880861	38984838	1903	237	T1D	HF	0.405677	0.09023	0.77844	0.164574	0.0093	0.60596	0.0130979
727	4	139553761	141087047	1609	216	T1D	HF	0.154007	-0.23019	0.55534	0.0237181	0	0.30945	0.403209
765	4	182065647	182946258	1672	233	T1D	HF	-0.507805	-0.90755	-0.18333	0.257866	0.0337	0.82364	0.00302485
785	5	9203856	10549029	1849	247	T1D	HF	0.0822196	-0.30981	0.47554	0.00676007	0	0.23342	0.659193
832	5	65606871	67096191	2034	183	T1D	HF	0.210419	-0.1777	0.62764	0.044276	0	0.39495	0.269772
888	5	132554691	134556570	2300	275	T1D	HF	-0.164274	-0.61378	0.24805	0.0269859	0	0.37967	0.418233
919	5	172285683	173606995	1931	234	T1D	HF	-0.365501	-0.85667	0.02201	0.133591	0	0.73388	0.0669849
926	6	63979	1380679	1754	251	T1D	HF	0.0950483	-0.23945	0.44116	0.00903419	0	0.19833	0.568425
928	6	2746532	3964072	1805	239	T1D	HF	0.0327938	-0.30743	0.36834	0.00107543	0	0.15813	0.842752
932	6	6621938	7808323	1945	251	T1D	HF	-0.106325	-0.47408	0.23491	0.0113051	0	0.22802	0.528006
936	6	11790672	13352326	2120	210	T1D	HF	-0.352862	-0.74548	-0.008	0.124511	0.00157	0.55574	0.045536
971	6	34979271	36346353	1655	172	T1D	HF	-0.230188	-0.67001	0.16166	0.0529864	0	0.44892	0.233278
972	6	36346354	37570051	1857	217	T1D	HF	-0.0731513	-0.45714	0.29544	0.00535112	0	0.22087	0.686014
976	6	40778402	42103738	1797	239	T1D	HF	-0.256189	-0.71825	0.13343	0.0656326	0	0.51717	0.1912
978	6	43770627	44596897	1085	216	T1D	HF	0.206668	-0.17589	0.62032	0.0427116	0	0.3848	0.278236
1125	7	25671576	27351286	2343	219	T1D	HF	0.128618	-0.22569	0.50385	0.0165425	0	0.25627	0.461192
1330	8	101448440	102548680	1292	180	T1D	HF	0.238563	-0.16376	0.66676	0.0569124	0	0.44484	0.22612
1412	9	34704545	36749273	2198	234	T1D	HF	0.184498	-0.18351	0.58542	0.0340395	0	0.34272	0.317697
1479	9	136042491	136770926	1133	174	T1D	HF	-0.206273	-0.70743	0.2473	0.0425488	0	0.50209	0.348302
1552	10	71050505	71672997	1196	200	T1D	HF	0.100667	-0.34582	0.55692	0.0101338	0	0.32544	0.634103
1553	10	71672998	72659223	1889	229	T1D	HF	0.00383889	-0.43768	0.43872	1.47371e-05	0	0.25252	0.985247
1589	10	114255955	115588903	1515	215	T1D	HF	0.183886	-0.1937	0.58361	0.033814	0	0.34179	0.319235
1601	10	127997709	129134738	1330	198	T1D	HF	0.0309304	-0.34836	0.41124	0.000956689	0	0.20136	0.865199
1744	12	3871115	4967643	1342	226	T1D	HF	0.226584	-0.15367	0.66294	0.0513404	0	0.43949	0.239555
1764	12	23923799	25058714	1747	231	T1D	HF	-0.211881	-0.63856	0.17214	0.0448936	0	0.40872	0.271856
1840	12	110111515	111592381	1380	125	T1D	HF	0.608235	0.25672	1	0.36995	0.06591	1	0.00158816
1940	13	101573737	103050417	2213	243	T1D	HF	-0.274722	-0.78496	0.15257	0.0754722	0	0.61759	0.189677
2017	14	89482884	90662836	1475	195	T1D	HF	0.012592	-0.3584	0.3836	0.000158559	0	0.18543	0.944006
2027	14	100786190	102004377	1483	237	T1D	HF	0.2741	0.0184	0.53886	0.0751309	0.00127	0.29037	0.0349936
2093	15	93707011	94565521	1532	236	T1D	HF	-0.0486888	-0.44863	0.33993	0.0023706	0	0.22237	0.79233
2127	16	27443062	29043177	1014	151	T1D	HF	0.190171	-0.11521	0.5062	0.0361649	0	0.25624	0.208434
2162	16	81437862	82310204	1501	238	T1D	HF	-0.199977	-0.64159	0.18351	0.0399907	0	0.41331	0.303105
2168	16	86058598	86748867	1439	275	T1D	HF	-0.153651	-0.5122	0.18313	0.0236088	0	0.26268	0.366659
2216	17	54950108	56245227	1382	251	T1D	HF	0.253981	-0.05047	0.57497	0.0645061	0	0.33059	0.101116
2231	17	74908267	75619256	1124	185	T1D	HF	-0.129352	-0.61828	0.30541	0.0167319	0	0.38793	0.542402
2250	18	11872227	12735558	1499	136	T1D	HF	0.311124	-0.13471	0.81596	0.0967982	0	0.66618	0.161
2274	18	45718493	46558306	1219	229	T1D	HF	-0.484298	-1	-0.06444	0.234545	0.00664	1	0.0231043
2318	19	10028841	11681978	1867	215	T1D	HF	0.148302	-0.21611	0.53318	0.0219935	0	0.28505	0.412696
2357	19	50451926	51259178	816	142	T1D	HF	-0.313553	-0.8495	0.12856	0.0983155	0	0.72165	0.162405
2380	20	10279604	11257012	1499	184	T1D	HF	-0.200067	-0.55947	0.13359	0.0400268	0	0.31451	0.230103
2391	20	19957929	21682377	1696	192	T1D	HF	0.548811	0.14719	1	0.301194	0.02231	1	0.00879181
2413	20	49236419	50653620	2081	250	T1D	HF	-0.183188	-0.43632	0.06003	0.0335577	0	0.19038	0.141799
2449	21	34383795	35729261	1605	224	T1D	HF	0.247986	-0.06431	0.58821	0.0614972	0	0.34599	0.123033
2450	21	35729262	37303548	2111	228	T1D	HF	0.0605413	-0.38493	0.50389	0.00366525	0	0.28473	0.771512
2458	21	43812792	44815008	143	92	T1D	HF	0.0948724	-0.23572	0.43386	0.00900077	0	0.1944	0.563359
35	1	36855140	38474036	2150	221	T1D	PAD	-0.377076	-0.78182	-0.03708	0.142187	0.00317	0.61124	0.0328562
156	1	202583885	204092537	1886	224	T1D	PAD	0.0247948	-0.35115	0.402	0.000614783	0	0.19258	0.889631
221	2	15721704	17241115	2105	244	T1D	PAD	-0.0392211	-0.44829	0.34877	0.0015383	0	0.22565	0.834652
313	2	121073753	122026817	1234	176	T1D	PAD	-0.156147	-0.66595	0.28762	0.0243818	0	0.44717	0.479146
427	3	4835084	5496182	833	180	T1D	PAD	-0.0488365	-0.46551	0.33492	0.002385	0	0.23616	0.79717
438	3	16084006	17182494	1777	202	T1D	PAD	0.29768	-0.05223	0.67788	0.0886134	0	0.45952	0.0934962
483	3	71223282	72334704	1400	252	T1D	PAD	-0.587027	-1	-0.24799	0.344601	0.0615	1	0.0014228
603	4	5972710	7135819	1712	268	T1D	PAD	0.148274	-0.16629	0.46419	0.0219852	0	0.21548	0.340008
638	4	37880861	38984838	1912	235	T1D	PAD	0.315004	0.03307	0.60789	0.0992274	0.00218	0.36953	0.0269815
756	4	174470207	175295842	1068	152	T1D	PAD	0.12719	-0.26969	0.53321	0.0161772	0	0.29001	0.50785
765	4	182065647	182946258	1724	231	T1D	PAD	-0.0100626	-0.36034	0.32965	0.000101257	0	0.16112	0.952535
768	4	184338585	185483262	1885	270	T1D	PAD	0.210866	-0.12495	0.55368	0.0444647	0	0.30688	0.197569
887	5	130573818	132554690	1754	111	T1D	PAD	-0.335978	-0.75881	0.04169	0.112881	0	0.5758	0.0756288
918	5	170898341	172285682	1821	262	T1D	PAD	-0.0191054	-0.3477	0.28698	0.000365015	0	0.13618	0.900893
928	6	2746532	3964072	1851	239	T1D	PAD	0.185987	-0.10951	0.49943	0.0345913	0	0.24943	0.218261
952	6	27261036	28666364	1986	78	T1D	PAD	-0.284748	-0.51302	-0.06038	0.0810814	0.00415	0.26319	0.0127389
1042	6	112342874	113705003	1532	172	T1D	PAD	0.165915	-0.24979	0.59907	0.0275277	0	0.36292	0.40341
1119	7	20122180	21390644	2040	241	T1D	PAD	0.0281926	-0.33185	0.37841	0.00079482	0	0.17157	0.868755
1260	8	16988031	17492672	1019	174	T1D	PAD	-0.355649	-0.87045	0.06127	0.126486	0	0.75768	0.0917828
1353	8	128073655	129291118	1898	262	T1D	PAD	-0.0705433	-0.37381	0.22054	0.00497636	0	0.14214	0.622929
1358	8	133461552	134509448	1665	212	T1D	PAD	-0.0140276	-0.4124	0.36832	0.000196774	0	0.20318	0.940341
1412	9	34704545	36749273	2210	237	T1D	PAD	-0.313313	-0.75794	0.05512	0.0981653	0	0.57448	0.0944025
1472	9	128785783	129617771	1124	197	T1D	PAD	-0.410249	-0.89859	-0.01686	0.168304	0.00279	0.80747	0.0389536
1476	9	132999453	134141936	1274	208	T1D	PAD	0.138873	-0.35123	0.61729	0.0192858	0	0.39524	0.530517
1544	10	62626466	64069687	1993	176	T1D	PAD	0.171956	-0.25574	0.61611	0.0295689	0	0.38166	0.412047
1552	10	71050505	71672997	1206	203	T1D	PAD	-0.0957899	-0.56609	0.34018	0.0091757	0	0.32929	0.642761
1559	10	79952997	81190573	1879	271	T1D	PAD	-0.0654768	-0.31636	0.17622	0.00428721	0	0.10099	0.597954
1603	10	129831970	130694008	1471	231	T1D	PAD	-0.298076	-0.67976	0.04048	0.0888493	0	0.46207	0.0831934
1725	11	120064529	121208186	1411	181	T1D	PAD	0.330516	-0.0856	0.81816	0.109241	0	0.66938	0.118953
1727	11	122589225	123398882	1224	181	T1D	PAD	0.219931	-0.12492	0.57383	0.0483695	0	0.32928	0.198373
1731	11	126304241	127306871	1530	210	T1D	PAD	-0.00374926	-0.40327	0.37556	1.40569e-05	0	0.19893	0.98403
1733	11	128262551	129451784	983	189	T1D	PAD	-0.00516589	-0.34739	0.32203	2.66865e-05	0	0.15143	0.974654
1841	12	111592382	113947983	2063	165	T1D	PAD	0.763617	0.56996	0.99793	0.58311	0.32486	0.99586	1.96804e-10
1844	12	115439452	116197675	1166	191	T1D	PAD	0.249269	-0.12015	0.64263	0.0621351	0	0.41298	0.171149
1852	12	124843769	126079935	1855	264	T1D	PAD	0.00524266	-0.24786	0.25528	2.74855e-05	0	0.08218	0.966899
1872	13	27392006	28587125	2060	218	T1D	PAD	-0.0944251	-0.59288	0.34931	0.0089161	0	0.36487	0.664493
1873	13	28587126	30068525	2020	193	T1D	PAD	0.0985949	-0.37474	0.58762	0.00972096	0	0.369	0.654541
1945	13	107037865	108521978	2029	268	T1D	PAD	-0.180302	-0.58018	0.17785	0.0325089	0	0.33661	0.316976
1955	14	20876081	21982654	1428	260	T1D	PAD	0.0905602	-0.33081	0.49533	0.00820116	0	0.26097	0.645554
1965	14	32382246	33591113	1613	227	T1D	PAD	0.182534	-0.22664	0.61118	0.0333187	0	0.37425	0.345794
1981	14	49002066	50500564	1978	182	T1D	PAD	0.633565	0.25542	1	0.401404	0.06524	1	0.00324471
1993	14	61652817	62717985	1368	199	T1D	PAD	0.196044	-0.19513	0.61321	0.0384331	0	0.37646	0.310049
2027	14	100786190	102004377	1503	237	T1D	PAD	0.0932183	-0.23133	0.4154	0.00868964	0	0.17581	0.554147
2039	15	26392948	27563172	1440	211	T1D	PAD	-0.146819	-0.47554	0.1533	0.0215559	0	0.22658	0.336323
2048	15	37962916	39238840	1687	207	T1D	PAD	-0.15577	-0.51553	0.18822	0.0242643	0	0.26582	0.35704
2093	15	93707011	94565521	1543	235	T1D	PAD	0.204432	-0.19654	0.61527	0.0417923	0	0.38028	0.282983
2126	16	26154123	27443061	2006	267	T1D	PAD	0.224401	-0.09162	0.55558	0.0503557	0	0.30867	0.161488
2159	16	78973581	79662634	1246	249	T1D	PAD	-0.298778	-0.70932	0.04809	0.0892684	0	0.50313	0.0930008
2162	16	81437862	82310204	1524	241	T1D	PAD	0.277077	-0.1459	0.75305	0.0767714	0	0.56736	0.186903
2167	16	85146806	86058597	1001	226	T1D	PAD	-0.165352	-0.52408	0.15989	0.0273412	0	0.27466	0.31869
2175	17	1480057	2699135	1248	195	T1D	PAD	0.150679	-0.1881	0.48681	0.0227041	0	0.23698	0.355871
2231	17	74908267	75619256	1202	184	T1D	PAD	0.11227	-0.31485	0.5388	0.0126047	0	0.30012	0.578003
2318	19	10028841	11681978	1991	218	T1D	PAD	-0.183247	-0.61797	0.21018	0.0335795	0	0.38189	0.340693
2340	19	33785836	34633274	1429	186	T1D	PAD	0.201364	-0.2458	0.68561	0.0405474	0	0.47163	0.345867
2413	20	49236419	50653620	2078	248	T1D	PAD	-0.0715657	-0.34838	0.18884	0.00512164	0	0.12237	0.592285
2449	21	34383795	35729261	1640	224	T1D	PAD	-0.364253	-0.72432	-0.04966	0.13268	0.00345	0.52463	0.0249119
2471	22	26166935	27192923	1642	233	T1D	PAD	0.0946918	-0.26355	0.46026	0.00896654	0	0.21996	0.588989
2472	22	27192924	27952441	1364	259	T1D	PAD	-0.215013	-0.63997	0.16094	0.0462304	0	0.41063	0.249243
2474	22	29457602	30962255	2005	170	T1D	PAD	-0.560503	-0.94346	-0.26017	0.314163	0.06769	0.89012	0.000614404
4	1	2983520	3582047	812	155	T1D	Stroke	0.170353	-0.27663	0.63872	0.0290201	0	0.41648	0.420886
16	1	14720132	15755230	1653	247	T1D	Stroke	-0.654519	-1	-0.27077	0.428396	0.07331	1	0.00146108
29	1	29188427	30405182	1411	188	T1D	Stroke	-0.187893	-0.51654	0.12089	0.0353039	0	0.26681	0.233647
98	1	111134063	112489248	2334	244	T1D	Stroke	0.0903099	-0.25757	0.4465	0.00815588	0	0.20397	0.593859
99	1	112489249	113418037	1063	156	T1D	Stroke	-0.141064	-0.57296	0.23932	0.0198989	0	0.32828	0.458474
113	1	154685546	156813845	1630	203	T1D	Stroke	-0.326342	-0.6725	-0.03037	0.106499	0.00245	0.45226	0.0403365
125	1	167163955	168179086	1272	173	T1D	Stroke	0.0600047	-0.38469	0.5073	0.00360057	0	0.28454	0.773093
186	1	236199672	237409458	1987	200	T1D	Stroke	0.18525	-0.24161	0.63985	0.0343175	0	0.41054	0.374158
268	2	60775067	62429910	1887	189	T1D	Stroke	0.0185768	-0.37176	0.40474	0.000345098	0	0.20477	0.920325
374	2	191051955	193033982	2250	206	T1D	Stroke	-0.219442	-0.5704	0.08843	0.0481548	0	0.32536	0.160445
381	2	202504863	203639686	1181	135	T1D	Stroke	-0.00522108	-0.45326	0.43539	2.72596e-05	0	0.26479	0.979976
383	2	205038120	206821199	1860	266	T1D	Stroke	0.532199	0.20909	0.9381	0.283236	0.04372	0.88002	0.00247805
483	3	71223282	72334704	1424	258	T1D	Stroke	-0.0468941	-0.39115	0.28303	0.00219906	0	0.1648	0.771802
580	3	181424324	183203155	1692	188	T1D	Stroke	-0.16656	-0.64406	0.2562	0.0277422	0	0.41803	0.424085
584	3	186602046	187939199	1970	274	T1D	Stroke	-0.0723759	-0.39227	0.22347	0.00523828	0	0.15585	0.627388
638	4	37880861	38984838	1966	243	T1D	Stroke	-0.0674437	-0.42334	0.26863	0.00454865	0	0.18697	0.684336
768	4	184338585	185483262	1919	274	T1D	Stroke	-0.152843	-0.57657	0.22318	0.0233609	0	0.33244	0.407816
809	5	37925488	39438985	1966	195	T1D	Stroke	0.334036	-0.09871	0.80855	0.11158	0	0.65397	0.110708
881	5	124109486	125131720	1631	213	T1D	Stroke	0.472543	0.16641	0.82148	0.223297	0.02773	0.67483	0.00378108
887	5	130573818	132554690	1785	117	T1D	Stroke	-0.328931	-0.74626	0.0282	0.108196	0	0.5569	0.0761201
888	5	132554691	134556570	2432	283	T1D	Stroke	0.0315135	-0.41857	0.44949	0.000993103	0	0.25964	0.876009
893	5	141253831	142532956	1754	217	T1D	Stroke	-0.0303963	-0.38942	0.30936	0.000923937	0	0.17192	0.861064
916	5	168342744	169506966	1971	230	T1D	Stroke	0.0159956	-0.34861	0.38577	0.000255858	0	0.18148	0.927459
918	5	170898341	172285682	1872	269	T1D	Stroke	0.109352	-0.16223	0.38728	0.0119579	0	0.15007	0.425013
926	6	63979	1380679	1842	258	T1D	Stroke	-0.252547	-0.57287	0.04235	0.0637802	0	0.32818	0.0893515
927	6	1380680	2746531	1935	232	T1D	Stroke	0.24968	-0.13136	0.66207	0.0623402	0	0.43834	0.194071
932	6	6621938	7808323	2017	262	T1D	Stroke	0.0600043	-0.31217	0.40997	0.00360052	0	0.18485	0.729297
936	6	11790672	13352326	2190	218	T1D	Stroke	0.149293	-0.23828	0.53006	0.0222885	0	0.28562	0.42195
937	6	13352327	15069421	1875	244	T1D	Stroke	0.130744	-0.21182	0.48762	0.017094	0	0.23811	0.440983
948	6	23939307	24950379	1898	203	T1D	Stroke	0.220536	-0.09267	0.54261	0.0486363	0	0.29442	0.161143
959	6	31250557	31320268	85	16	T1D	Stroke	0.420974	0.06716	0.80166	0.177219	0.0069	0.64266	0.0228113
[truncated: 2,430 more rows]

## Sheet: Supplementary Table 6
Supplementary Table 6. Genomic risk loci identified for results of six autoimmune diseases and six cardiovascular diseases using FUMA
Note: for comparative purposes we report whether the identified loci overlap with the loci identified by PLACO analysis and reported by single trait GWAS analysis. We therefore defined the locus as 500 kb before and after the position of the index variant. Genomic risk loci association tests are two-sided and significance is determined by surpassing the genome-wide significance threshold, P < 5 x…
Trait	Locus	Unique SNP ID	rsID	Cytoband	CHR	BP	P	Start	End	nSNPs	nGWASSNPs	nIndSigSNPs	IndSigSNPs	nLeadSNPs	LeadSNPs	Functional category	CADD	RDB	Positional mapping	eQTL mapping	Results from AD GWAS analysis							Results from CVD GWAS analysis							COLOC analysis
																					ORAD	PAD	Overlap	TopSNP	CHR	Start	End	ORCVD	PCVD	Overlap	TopSNP	CHR	Start	End	PP.H1	PP.H2	PP.H3	PP.H4	Best causal SNP	SNP.PP.H4
RA-AF	1	1:154428283:A:G	rs12133641	1q21.3	1	154428283	3.36214e-12	154395212	154428283	36	21	1	rs12133641	1	rs12133641	intronic	5.256	7	IL6R	IL6R, TDRD10	0.9359	5.6e-07	no					0.9603	2.73e-09	yes	rs11264278	1	154395125	155668700	7.41021e-71	0.0187888	0.980998	0.000213165	rs11264278	1
RA-AF	2	1:155028522:A:G	rs11264302	1q21.3	1	155028522	1.5565e-10	154984363	155030557	32	13	3	rs11264302;rs3753639;rs10796936	1	rs11264302	intronic	2.211	5	ZBTB7B, DCST2, DCST1, ADAM15, EFNA4, EFNA3	KCNN3, PBXIP1, ZBTB7B, DCST2, ADAM15, THBS3, ENTREP3, FDPS	0.956	0.001133	no					0.9481	3.75e-15	yes	rs11264278	1	154395125	155668700	3.94474e-71	0.472422	0.522218	0.00535979	rs11264278	1
RA-AF	3	1:161479745:A:G	rs1801274	1q23.3	1	161479745	4.50034e-08	161463601	161479745	7	1	1	rs1801274	1	rs1801274	exonic	0.979	NA	FCGR2A	FCGR2B	1.0719	1.76e-07	yes	rs7518087	1	161399920	161565381	1.0245	0.000285	no					0.842327	2.92169e-05	0.0661418	0.0911306	rs7539468	0.0607609
RA-AF	4	2:61068167:C:T	rs1432296	2p16.1	2	61068167	2.75366e-08	60948744	61309708	58	1	1	rs1432296	1	rs1432296	ncRNA_intronic	6.775	4	PAPOLG, REL, PUS10, PEX13, SANBR	REL, PUS10, C2orf74, USP34	1.1098	2.88e-09	yes	rs67574266	2	60948744	61309708	0.9703	0.001476	no					0.00125546	1.40813e-09	0.998737	7.08629e-06	rs67574266	0.279564
RA-AF	5	2:70173327:A:C	rs6731423	2p13.3	2	70173327	1.08027e-08	69995580	70539853	212	51	3	rs6731423;rs12713685;rs12475412	1	rs6731423	intergenic	3.835	5	ANXA4, GMCL1, SNRNP27, MXD1, ASPRV1, PCBP1, C2orf42, TIA1, PCYOX1, SNRPG, FAM136A	ANXA4, GMCL1, SNRNP27, ASPRV1, C2orf42, PCYOX1, FAM136A	1.053	0.000348	no					0.9634	2.54e-08	yes	rs60207187	2	69905400	70175327	2.15134e-10	0.0947093	0.901029	0.00426165	rs60207187	0.194667
RA-AF	6	2:179381715:C:G	rs6723399	2q31.2	2	179381715	9.22434e-09	179381323	179595117	51	4	1	rs6723399	1	rs6723399	downstream	0.267	7	PLEKHA3, TTN	PRKRA, FKBP7	0.9587	0.03408	no					1.0837	5.99e-21	yes	rs890578	2	179284643	179692967	9.77029e-20	0.912112	0.0521519	0.0357362	rs890578	0.263073
RA-AF	7	2:198944271:A:G	rs6716898	2q33.1	2	198944271	6.14889e-09	198393835	198954774	227	18	2	rs6716898;rs59007763	1	rs6716898	intronic	0.433	6	MOB4, RFTN2, MARS2, BOLL, PLCL1	SF3B1, RFTN2, MARS2, PLCL1	0.9379	3.77e-06	no					1.0299	9.31e-06	no					0.0175673	0.0413707	0.782838	0.157296	rs6716898	0.114628
RA-AF	8	2:201233502:A:G	rs295132	2q33.1	2	201233502	8.67642e-11	201080113	201253956	109	35	3	rs295132;rs3754798;rs1431766	1	rs295132	intronic	1.798	NA	SPATS2L	SATB2, C2orf69, TYW5, MAIP1, SPATS2L	1.0395	0.003482	no					1.062	1.7e-19	yes	rs3820888	2	200715388	201253956	3.68601e-19	0.793027	0.0424885	0.164484	rs56326533	0.318521
RA-AF	9	3:12620720:A:G	rs2454429	3p25.2	3	12620720	4.88724e-08	12611269	12738547	45	1	1	rs2454429	1	rs2454429	intronic	0.404	7	MKRN2OS, MKRN2, RAF1	TIMP4, TSEN2, MKRN2OS, MKRN2, RAF1	0.9359	2.47e-06	no					0.9737	6.85e-05	no					4.33889e-18	0.174307	0.817558	0.00813527	rs4642101	0.943459
RA-AF	10	4:103915618:C:T	rs3960788	4q24	4	103915618	2.35421e-08	103684014	103962532	399	16	1	rs3960788	1	rs3960788	intronic	4.112	NA	MANBA, UBE2D3, CISD2, SLC9B1, SLC9B2	MANBA, UBE2D3, CISD2, BDH2, CENPE	1.0543	0.00031	no					1.0372	5.98e-08	yes	rs6818418	4	103618023	103975060	0.000320007	0.311842	0.17363	0.513635	rs3960788	0.0469608
RA-AF	11	5:137502183:A:T	rs146949871	5q31.2	5	137502183	1.87312e-08	137502183	137764881	9	3	1	rs146949871	1	rs146949871	intronic	14.39	7	BRD8, KIF20A, CDC23, CDC25C, FAM53C, KDM3B, REEP2	#N/A	1.1277	0.004918	no					1.1218	1.19e-12	yes	rs2040862	5	136738113	137836830	5.27952e-31	0.92692	0.0474836	0.0255963	rs17171711	0.306847
RA-AF	12	5:142906561:C:T	rs57450351	5q31.3	5	142906561	8.63284e-11	142893637	142917947	24	6	1	rs57450351	1	rs57450351	ncRNA_intronic	11.2	7	#N/A	#N/A	0.9561	0.00063	no					0.9486	1.39e-14	yes	rs6580277	5	142620736	142978777	9.93149e-13	0.753029	0.238039	0.00893214	rs72804710	0.0932339
RA-AF	13	6:33406405:C:T	rs45473295	6p21.32	6	33406405	1.1177e-12	33214857	33789178	14	8	3	rs45473295;rs188673988;rs57512828	2	rs45473295;rs57512828	intronic	1.75	5	VPS52, SYNGAP1, ITPR3, UQCC2, LEMD2, MLN	BAK1, ITPR3, UQCC2, IP6K3, MLN	0.5808	5.01e-14	yes	rs74556364	6	33172905	33952273	1.1227	5.52e-05	no					0.735878	2.96282e-141	0.257996	0.00612616	rs1431394	0.531115
RA-AF	14	6:122432029:C:T	rs11758026	6q22.31	6	122432029	3.03262e-09	122388851	122708686	208	11	1	rs11758026	1	rs11758026	intergenic	0.408	5	#N/A	TBC1D32, HSF2, SERINC1	1.0426	0.01065	no					0.9444	1.55e-16	yes	rs13195459	6	121910645	122940296	3.47086e-14	0.784794	0.165393	0.0498132	rs72966339	0.153385
RA-AF	15	7:92252203:C:G	rs42046	7q21.2	7	92252203	4.17373e-14	92223518	92327026	56	30	3	rs42046;rs17688839;rs42031	1	rs42046	intronic	16.21	5	FAM133B, CDK6	KRIT1, GATAD1	1.0775	7.08e-07	no					0.9491	6.02e-12	yes	rs56201652	7	92239144	92327026	2.8446e-08	0.00114721	0.0348964	0.963956	rs56201652	0.198313
RA-AF	16	7:116167208:C:T	rs926198	7q31.2	7	116167208	2.80169e-10	116128998	116171510	11	3	1	rs926198	1	rs926198	intronic	8.317	4	CAV2, CAV1	CAV2	0.9497	0.001396	no					0.9464	1.02e-14	yes	rs11773845	7	115725211	116226422	3.09822e-50	0.910184	0.0835748	0.00624072	rs11773845	0.588605
RA-AF	17	11:20007668:A:T	rs2896590	11p15.1	11	20007668	2.14264e-09	19990758	20011809	30	19	1	rs2896590	1	rs2896590	intronic	17.11	5	NAV2	#N/A	1.0467	0.01331	no					1.0739	8.34e-20	yes	rs10741807	11	19981627	20019137	7.12965e-16	0.797085	0.0785269	0.124389	rs4757877	0.134043
RA-AF	18	12:24710591:A:G	rs7132989	12p12.1	12	24710591	1.34484e-08	24697192	24822155	76	13	2	rs7132989;rs11047551	1	rs7132989	ncRNA_intronic	2.276	5	#N/A	#N/A	1.0562	0.006593	no					1.0665	7.03e-14	yes	rs11047539	12	24591890	24920794	8.36782e-20	0.585191	0.402224	0.012585	rs137913153	0.219974
RA-AF	19	12:114768127:A:G	rs10744820	12q24.21	12	114768127	1.84959e-09	114758773	114816548	40	1	1	rs10744820	1	rs10744820	intergenic	0.22	6	TBX5	#N/A	0.9508	0.01595	no					0.9096	1.62e-21	yes	rs883079	12	114692036	114877400	5.42268e-35	0.927626	0.0631672	0.00920726	rs883079	0.390492
RA-AF	20	14:64688175:C:G	rs1152588	14q23.2	14	64688175	2.81648e-09	64649073	64877135	148	14	3	rs1152588;rs4986938;rs2781379	1	rs1152588	intronic	5.188	5	SYNE2, ESR2, MTHFD1	SYNE2, ESR2, MTHFD1, PPP1R36, PLEKHG3	1.0353	0.02439	no					1.069	3.79e-23	yes	rs1152591	14	64612845	64877135	1.08401e-25	0.824616	0.0467507	0.128633	rs1152591	0.982608
RA-AF	21	15:69968045:A:G	rs9920211	15q23	15	69968045	2.77833e-09	69968045	69969105	2	1	1	rs9920211	1	rs9920211	ncRNA_intronic	1.549	5	#N/A	#N/A	1.1408	1.3e-16	yes	rs919053	15	69964858	70048157	1.0209	0.007047	no					0.336969	8.37339e-17	0.65941	0.00362091	rs919053	0.464707
RA-AF	22	16:73024736:A:G	rs60028025	16q22.3	16	73024736	6.81794e-12	73007598	73026439	16	4	2	rs60028025;rs11075957	1	rs60028025	intronic	2.637	6	ZFHX3	#N/A	0.9426	0.003987	no					1.0873	2.61e-22	yes	rs2359171	16	73005822	73100503	5.10352e-86	0.741708	0.0593989	0.198893	rs2359171	0.805652
RA-AF	23	17:38026169:C:T	rs11655198	17q12	17	38026169	1.6691e-15	37389409	38089717	570	281	4	rs11655198;rs1619021;rs4795389;rs903506	1	rs11655198	intronic	1.156	6	STAC2, FBXL20, MED1, CDK12, NEUROD2, PPP1R1B, STARD3, TCAP, PNMT, PGAP3, ERBB2, MIEN1, GRB7, IKZF3, ZPBP2, GSDMB, ORMDL3, LRRC3C	STAC2, FBXL20, PPP1R1B, STARD3, PNMT, PGAP3, ERBB2, IKZF3, ZPBP2, GSDMB, ORMDL3, GSDMA, CSF3, MED24, MSL1, CASC3	0.9302	9.28e-09	yes	rs4795395	17	37780296	38089717	1.0445	6e-11	yes	rs12944882	17	37780296	38082807	1.86464e-06	9.10668e-06	0.225883	0.774106	rs11655198	0.0735117
RA-AF	24	19:5174936:C:T	rs2613813	19p13.3	19	5174936	1.17739e-09	5106379	5189268	15	1	1	rs2613813	1	rs2613813	intergenic	6.573	6	KDM4B, PTPRS	#N/A	1.0782	5.8e-06	no					0.9659	8.5e-07	no					0.00585488	0.113344	0.157794	0.71882	rs2613813	0.985582
RA-AF	25	20:44674743:A:C	rs2297199	20q13.12	20	44674743	7.66486e-09	44674743	44747947	19	2	2	rs2297199;rs4578918	1	rs2297199	intronic	2.825	5	SLC12A5, NCOA5, CD40	SLC12A5, CD40	0.9358	3.59e-07	yes	rs4239702	20	44680412	44749251	1.0271	7.19e-05	no					0.933187	1.81133e-08	0.0512369	0.0155758	rs4239702	0.32441
RA-AF	26	22:21950405:A:G	rs4821104	22q11.21	22	21950405	2.55173e-08	21910280	21985094	110	16	1	rs4821104	1	rs4821104	intronic	0.605	7	UBE2L3, YDJC, CCDC116	UBE2L3, YDJC, CCDC116	1.0994	5.01e-09	yes	rs11089637	22	21911220	21985094	1.0281	0.00089	no					0.692407	3.37864e-06	0.0412122	0.266321	rs11089637	0.0531841
RA-CAD	1	1:38408903:C:T	rs34888189	1p34.3	1	38408903	3.20052e-08	38390717	38457741	22	2	1	rs34888189	1	rs34888189	intronic	1.537	6	INPP5B, SF3A3, FHL3	INPP5B, SF3A3, FHL3, UTP11	1.098	0.000144	no					0.9624	2.52e-07	yes	rs28470722	1	38238071	38463504	7.5758e-06	5.67706e-05	0.999926	9.54261e-06	rs17465420	0.117613
RA-CAD	2	1:114377148:C:T	rs1970559	1p13.2	1	114377148	1.47098e-18	113871830	114447914	233	75	7	rs12021500;rs72685699;rs1970559;rs1217397;rs12119076;rs7511816;rs12144309	2	rs12021500;rs1970559	intronic	1.854	7	MAGI3, PHTF1, RSBN1, PTPN22, BCL2L15, AP4B1, DCLRE1B	MAGI3, PHTF1, PTPN22, BCL2L15, AP4B1, OLFML3, BCAS2	0.8776	4.53e-19	yes	rs2476601	1	113822487	114611487	0.969	1.05e-08	yes	rs3761936	1	114075796	114451386	2.35257e-07	4.19096e-161	0.0342515	0.965748	rs2476601	1
RA-CAD	3	1:150572037:A:T	rs11585169	1q21.2	1	150572037	6.72435e-09	150534368	150714651	66	1	1	rs11585169	1	rs11585169	downstream	0.35	6	ADAMTSL4, MCL1, ENSA, GOLPH3L, HORMAD1, CTSS	H2BC18, TARS2, GOLPH3L, HORMAD1, CTSS, CTSK, ARNT, CERS2, ANXA9, SEMA6C	0.9567	0.003165	no					0.9623	1.04e-14	yes	rs11585169	1	149892872	150958977	1.36093e-09	0.714815	0.0796217	0.205564	rs11585169	0.805344
RA-CAD	4	1:154425456:A:G	rs12126142	1q21.3	1	154425456	3.43074e-13	154395212	154428283	36	21	1	rs12126142	1	rs12126142	intronic	3.167	6	IL6R	IL6R, TDRD10	0.9359	5.39e-07	no					0.9654	2.26e-12	yes	rs6686750	1	154395125	154428505	9.78356e-10	0.0183693	0.959073	0.0225575	rs12126142	0.182282
RA-CAD	5	2:21453733:A:G	rs10166144	2p24.1	2	21453733	2.54441e-08	21319016	21476634	38	5	1	rs10166144	1	rs10166144	ncRNA_intronic	2.879	6	#N/A	APOB	0.931	0.00022	no					0.9594	1.36e-08	yes	rs581411	2	21179426	21471603	2.64409e-13	0.810892	0.138039	0.0510685	rs581411	0.251399
RA-CAD	6	2:65635872:A:G	rs2661799	2p14	2	65635872	4.24775e-08	65556324	65693513	93	1	1	rs2661799	1	rs2661799	intronic	1.369	6	SPRED2	#N/A	0.9051	1.72e-12	yes	rs1858037	2	65536082	65705581	1.0144	0.007041	no					0.796937	1.97968e-08	0.186361	0.0167017	rs2661799	0.226972
RA-CAD	7	2:216296257:C:G	rs1250242	2q35	2	216296257	3.51367e-08	216287093	216306635	15	2	1	rs1250242	1	rs1250242	intronic	4.516	5	FN1	#N/A	0.9616	0.02616	no					1.0481	1.26e-17	yes	rs1250247	2	216287093	216316487	3.28039e-13	0.854266	0.076112	0.0696215	rs1250247	0.392811
RA-CAD	8	3:153811226:A:G	rs1527799	3q25.2	3	153811226	1.07534e-11	153563827	154088411	333	123	1	rs1527799	1	rs1527799	ncRNA_intronic	4.192	NA	ARHGEF26, DHX36, GPR149	ARHGEF26, DHX36	1.0944	3.8e-05	no					0.9483	1.39e-12	yes	rs357494	3	153640429	154090022	1.71708e-09	0.0636731	0.118848	0.817479	rs357494	0.0816488
RA-CAD	9	5:55435220:A:C	rs10040327	5q11.2	5	55435220	7.49693e-09	55435220	55435220	1	1	1	rs10040327	1	rs10040327	intronic	1.896	5	ANKRD55	#N/A	0.8294	3.16e-17	yes	rs6873385	5	55435220	55567087	1.021	0.01294	no					1.00699e-06	1.39255e-18	0.999999	2.64332e-08	rs6873385	0.62528
RA-CAD	10	6:33643558:A:G	rs2229637	6p21.32	6	33643558	2.57893e-11	33211790	33798018	234	14	7	rs1061801;rs210191;rs2229637;rs4713653;rs942641;rs2967;rs11751943	4	rs1061801;rs210191;rs2229637;rs2967	exonic	0.042	1f	VPS52, RPS18, B3GALT4, WDR46, PFDN6, RGL2, TAPBP, ZBTB22, DAXX, BAK1, ITPR3, UQCC2, IP6K3, LEMD2, MLN	VPS52, RPS18, WDR46, TAPBP, ZBTB22, DAXX, CUTA, BAK1, ITPR3, UQCC2, IP6K3, LEMD2	0.8712	6.76e-22	yes	rs74556364	6	33172905	33952273	1.016	0.004101	no					0.889058	5.59021e-93	0.091469	0.0194734	rs74556364	1
RA-CAD	11	6:34745682:A:G	rs9296128	6p21.31	6	34745682	7.14768e-09	34549699	34832661	320	2	1	rs9296128	1	rs9296128	intergenic	2.071	7	ILRUN, SNRPC, BLTP3A	ILRUN, SNRPC, BLTP3A	1.0498	0.000286	no					1.0333	4.93e-10	yes	rs9469899	6	34548206	34832661	1.07547e-06	0.570745	0.158965	0.270285	rs9469899	0.312953
RA-CAD	12	6:43760327:C:G	rs11967262	6p21.1	6	43760327	1.46826e-08	43757082	43764551	5	1	1	rs11967262	1	rs11967262	intergenic	14.05	7	VEGFA	#N/A	1.0436	0.00259	no					0.9667	1.2e-11	yes	rs11967262	6	43757082	43764551	3.89921e-05	0.0190454	0.969042	0.0118732	rs11967262	0.967601
RA-CAD	13	6:134214525:C:G	rs12190287	6q23.2	6	134214525	1.87291e-08	134209837	134226147	3	1	1	rs12190287	1	rs12190287	UTR3	6.946	3a	TCF21	TCF21	1.0285	0.0474	no					0.9452	5.7e-23	yes	rs2327426	6	133992791	134378151	1.23504e-24	0.863825	0.100423	0.0357521	rs2327426	0.472222
RA-CAD	14	8:18272535:C:T	rs35246381	8p22	8	18272535	5.16804e-11	18239697	18291590	74	24	2	rs35246381;rs11780884	1	rs35246381	intergenic	0.882	5	NAT2	NAT2	1.0802	7.71e-07	no					1.0349	6.04e-09	yes	rs4646249	8	18239697	18291590	2.05767e-05	0.00607374	0.0588728	0.935031	rs35246381	0.208335
RA-CAD	15	10:6100725:A:G	rs3134883	10p15.1	10	6100725	1.03398e-08	6094604	6115171	15	5	1	rs3134883	1	rs3134883	intronic	2.918	NA	IL2RA	#N/A	1.1054	3.13e-13	yes	rs3134883	10	6094604	6406660	1.0167	0.002358	no					0.816507	3.38257e-09	0.0258905	0.157602	rs3134883	0.461998
RA-CAD	16	10:30408219:A:C	rs10826767	10p11.23	10	30408219	3.58219e-08	30381222	30452479	44	1	1	rs10826767	1	rs10826767	intergenic	0.073	5	JCAD	JCAD	1.0571	0.000676	no					0.9707	1.17e-08	yes	rs1887318	10	30291963	30566683	4.58263e-13	0.892417	0.0965903	0.0109929	rs1887318	0.550669
RA-CAD	17	10:63805735:A:G	rs6479781	10q21.2	10	63805735	3.99398e-09	63802574	63825807	30	11	1	rs6479781	1	rs6479781	intronic	17.08	2b	ARID5B	#N/A	1.0905	9.34e-09	yes	rs7902146	10	63779871	63825561	0.9811	0.000118	no					0.883875	3.18212e-08	0.109201	0.00692422	rs3740355	0.418118
RA-CAD	18	10:82214586:A:C	rs7098414	10q23.1	10	82214586	1.50775e-09	82059970	82287527	96	7	2	rs7098414;rs10749609	1	rs7098414	intronic	4.319	4	DYDC1, DYDC2, PRXL2A, TSPAN14	SFTPD, PLAC9, ANXA11, MAT1A, DYDC2, PRXL2A, TSPAN14	1.073	3.66e-06	no					1.0306	1.35e-07	yes	rs12260962	10	82236499	82283255	0.000191382	0.117473	0.796368	0.0859399	rs7098414	0.336298
RA-CAD	19	12:112059557:C:T	rs11065979	12q24.12	12	112059557	3.2422e-20	111684461	113039943	1058	474	9	rs11065979;rs10744777;rs233721;rs1344438;rs10849937;rs4766460;rs641084;rs12424641;rs3742006	2	rs11065979;rs12424641	intergenic	3.379	5	CUX2, PHETA1, SH2B3, ATXN2, BRAP, ACAD10, ALDH2, MAPKAPK5, TMEM116, ERP29, NAA25, TRAFD1, HECTD4, RPL6, PTPN11, RPH3A	ANAPC7, HVCN1, PHETA1, SH2B3, ACAD10, ALDH2, MAPKAPK5, TMEM116, ERP29, NAA25, TRAFD1, HECTD4	1.0836	1.05e-08	yes	rs3184504	12	111826477	112883476	1.0521	1.15e-22	yes	rs10774625	12	111359712	113200293	5.5975e-24	6.887e-07	0.0118504	0.988149	rs10774625	0.432824
RA-CAD	20	12:121398657:G:T	rs7954331	12q24.31	12	121398657	7.54848e-09	121380544	121455873	51	7	1	rs7954331	1	rs7954331	intergenic	0.984	3a	HNF1A, C12orf43, OASL	UNC119B, SPPL3, C12orf43, OASL, CAMKK2	0.9688	0.01748	no					1.0457	1.98e-18	yes	rs1169284	12	121220375	121489586	6.2086e-14	0.824953	0.119464	0.0555835	rs148608463	0.349533
RA-CAD	21	15:38834033:C:T	rs8032939	15q14	15	38834033	2.11731e-12	38820606	38925195	62	27	2	rs8032939;rs16967104	1	rs8032939	intronic	2.343	7	RASGRP1	RASGRP1	1.1093	1.03e-12	yes	rs7170151	15	38820606	38925195	1.0265	3.65e-06	no					0.0176405	4.31235e-09	0.0114569	0.970903	rs8032939	0.458038
RA-CAD	22	15:67455630:C:T	rs56062135	15q22.33	15	67455630	1.63694e-16	67441750	67468285	22	14	1	rs56062135	1	rs56062135	intronic	0.533	7	SMAD3	AAGAB	1.0696	1.21e-05	no					0.9438	2.27e-22	yes	rs56062135	15	67441750	67468285	1.82701e-18	0.012293	0.00565928	0.982048	rs56062135	0.357012
RA-CAD	23	15:69985284:C:G	rs12899564	15q23	15	69985284	2.83349e-09	69964858	70048157	76	23	1	rs12899564	1	rs12899564	ncRNA_intronic	2.414	5	#N/A	TLE3	0.8264	1.2e-13	yes	rs919053	15	69964858	70048157	1.0256	0.002649	no					0.964505	4.14944e-18	0.0326745	0.00282029	rs919053	0.619785
RA-CAD	24	15:79094069:C:G	rs7169068	15q25.1	15	79094069	1.7746e-08	79070351	79105381	18	3	1	rs7169068	1	rs7169068	intronic	3.818	6	ADAMTS7, MORF4L1	ADAMTS7, MORF4L1	0.9717	0.04562	no					1.0537	7.95e-23	yes	rs7173743	15	78941119	79215568	6.58377e-39	0.96257	0.0300125	0.00741749	rs7173743	0.887395
RA-CAD	25	16:75371744:C:G	rs3863445	16q23.1	16	75371744	1.66115e-12	75234273	75516739	489	261	3	rs3863445;rs4887830;rs9940370	1	rs3863445	intronic	1.257	3a	CTRB2, CTRB1, BCAR1, CFDP1, TMEM170A, CHST6	WDR59, ZFP1, CTRB1, BCAR1, CFDP1, TMEM170A	1.0471	0.000376	no					0.9573	1.94e-18	yes	rs11648176	16	75234273	75519917	5.48762e-16	0.414259	0.176568	0.409173	rs11648176	0.0318474
RA-CAD	26	17:37829604:C:T	rs903502	17q12	17	37829604	5.31855e-09	37389409	37903730	428	32	2	rs903502;rs7219294	1	rs903502	intronic	10.89	NA	STAC2, FBXL20, MED1, CDK12, NEUROD2, PPP1R1B, STARD3, TCAP, PNMT, PGAP3, ERBB2, MIEN1, GRB7	STAC2, FBXL20, PPP1R1B, STARD3, PNMT, PGAP3, ERBB2, IKZF3, GSDMB, ORMDL3, GSDMA, CSF3, MED24	0.9318	2.75e-07	yes	rs4795395	17	37780296	38089717	1.0225	2.41e-05	no					0.203732	3.15206e-05	0.784588	0.0116404	rs903506	0.0569759
RA-CAD	27	17:40377168:A:G	rs140105153	17q21.2	17	40377168	4.11343e-08	40287106	40451137	6	1	1	rs140105153	1	rs140105153	intronic	2.235	7	RAB5C, GHDC, STAT5B, STAT5A	DHX58, RAB5C, KCNH4, TUBG2, VAT1	1.1168	4e-06	no					1.04	1.06e-05	yes	rs2158067	17	40256498	40824834	4.8296e-05	0.434041	0.378622	0.187234	rs2158067	0.128128
RA-CAD	28	19:11271550:G:T	rs7260306	19p13.2	19	11271550	2.40446e-15	10727014	11278681	196	64	5	rs3843751;rs9797854;rs4804147;rs111427795;rs7260306	3	rs3843751;rs4804147;rs7260306	intergenic	0.411	5	SLC44A2, ILF3, QTRT1, DNM2, LDLR, SPC24, KANK2	KRI1, AP1M2, SLC44A2, ILF3, DNM2, C19orf38, SPC24, KANK2, ZNF625	1.0867	8.82e-08	yes	rs7251031	19	10408439	11275842	0.9632	1.72e-13	yes	rs55791371	19	10727014	11306007	6.66283e-38	0.000518827	0.999475	6.1829e-06	rs55791371	0.294758
RA-VTE	1	1:150255587:C:T	rs2147324	1q21.2	1	150255587	1.70521e-08	150247311	150511628	190	1	1	rs2147324	1	rs2147324	UTR5	8.745	NA	CA14, APH1A, C1orf54, CIART, PRPF3, RPRD2, TARS2, ECM1	CA14, C1orf54, PRPF3, RPRD2, TARS2, ECM1, ADAMTSL4, MCL1, ARNT, BNIPL, LYSMD1	1.0558	0.000716	no					0.9701	2.23e-08	yes	rs6693697	1	150247311	150515021	5.42798e-05	0.822609	0.0717605	0.104955	rs2147324	0.293286
RA-VTE	2	1:154426264:C:T	rs4129267	1q21.3	1	154426264	9.25937e-10	154395212	154428283	36	13	1	rs4129267	1	rs4129267	intronic	11.13	2b	IL6R	IL6R, TDRD10	0.9359	5.36e-07	no					1.0249	7.44e-06	no					0.0890829	0.000744603	0.0380066	0.87046	rs4129267	0.213207
RA-VTE	3	1:161477816:C:T	rs7518087	1q23.3	1	161477816	2.34545e-09	161399920	161565381	89	24	2	rs7518087;rs1801274	1	rs7518087	intronic	3.312	7	FCGR2A, HSPA6, FCGR3A, FCGR2B	FCGR2A, FCGR2B	1.119	4.77e-09	yes	rs7518087	1	161399920	161565381	1.0348	9.85e-05	no					0.0408698	0.000366231	0.830094	0.128652	rs7518087	0.261353
RA-VTE	4	1:168925183:C:T	rs2984603	1q24.2	1	168925183	6.17649e-09	168903257	168981560	44	9	1	rs2984603	1	rs2984603	ncRNA_intronic	0.151	7	#N/A	NME7	0.9495	0.00358	no					1.0502	4.05e-12	yes	rs1894692	1	168496949	170178132	0	0.884949	0.0823547	0.0326967	rs144737447	0.998711
RA-VTE	5	2:65569227:C:T	rs9789444	2p14	2	65569227	4.74589e-10	65556324	65705581	181	24	3	rs9789444;rs702875;rs12185577	1	rs9789444	intronic	8.594	6	SPRED2	SPRED2	0.9089	4.16e-12	yes	rs1858037	2	65536082	65705581	1.0229	0.000838	no					0.727391	7.58705e-09	0.0712272	0.201382	rs11695373	0.140678
RA-VTE	6	2:100764711:C:T	rs1821826	2q11.2	2	100764711	3.22297e-13	100576807	100889097	180	87	5	rs1821826;rs10865035;rs4851274;rs4322861;rs10211595	1	rs1821826	intergenic	2.078	6	AFF3, LONRF2	AFF3, LONRF2, CHST10, TBC1D8	0.9082	3.59e-13	yes	rs12474386	2	100632901	100889097	1.0243	1.96e-05	no					0.143156	6.23457e-10	0.158307	0.698538	rs10865035	0.0533261
RA-VTE	7	2:198660941:A:G	rs771017	2q33.1	2	198660941	1.16712e-08	198231218	198954774	279	53	1	rs771017	1	rs771017	intergenic	6.608	NA	SF3B1, COQ10B, HSPD1, HSPE1, MOB4, RFTN2, MARS2, BOLL, PLCL1	ANKRD44, SF3B1, RFTN2, MARS2, PLCL1	0.9353	4.79e-06	no					0.9758	6.23e-06	yes	rs78872368	2	198244598	198954831	0.0102731	0.0355213	0.672062	0.281601	rs771017	0.0380325
RA-VTE	8	2:204713891:G:T	rs231811	2q33.2	2	204713891	8.15635e-11	204690355	204794757	84	30	1	rs231811	1	rs231811	intergenic	5.915	5	CTLA4, ICOS	CARF, CTLA4	0.894	2.32e-18	yes	rs3087243	2	204586076	204801768	0.9825	0.002085	no					0.941666	2.01047e-16	0.0249584	0.033376	rs3087243	0.878158
RA-VTE	9	4:26085480:A:G	rs34185821	4p15.2	4	26085480	4.64055e-09	26085480	26128710	28	16	1	rs34185821	1	rs34185821	intergenic	0.798	2b	#N/A	RBPJ	1.1387	1.17e-21	yes	rs874040	4	26085018	26128710	1.0141	0.01857	no					0.428756	8.28183e-17	0.555292	0.0159523	rs6448432	0.168659
RA-VTE	10	4:38654681:C:T	rs4833079	4p14	4	38654681	2.05478e-09	38594895	38718732	36	4	2	rs4833079;rs3209570	1	rs4833079	ncRNA_intronic	3.964	5	KLF3	#N/A	0.9393	2.28e-06	no					0.9738	1.5e-06	no					0.0039466	0.016388	0.0185773	0.957777	rs4833079	0.496893
RA-VTE	11	4:155474683:A:G	rs115999709	4q32.1	4	155474683	2.50448e-08	155474683	155474683	1	1	1	rs115999709	1	rs115999709	intergenic	14.19	6	PLRG1, FGB	#N/A	1.111	0.01634	no					1.1307	1.87e-17	yes	rs2066864	4	155106847	155553541	1.37313e-183	0.918975	0.0488923	0.0321326	rs2066864	0.406907
RA-VTE	12	6:25560264:C:T	rs214055	6p22.2	6	25560264	2.53231e-09	25494503	25671873	144	12	2	rs214055;rs3804118	1	rs214055	intronic	1.244	7	CARMIL1, SCGN	CARMIL1, SCGN, HMGN4	1.1009	1.78e-08	yes	rs115503606	6	25494503	29611788	1.0286	5.11e-05	yes	rs214060	6	25525120	26123502	1.78639e-08	4.11799e-09	1	4.77839e-10	rs112977322	0.307383
RA-VTE	13	6:28247638:A:T	rs1778478	6p22.1	6	28247638	4.74668e-13	27516668	29263750	245	42	4	rs79001945;rs1778478;rs3129102;rs1778483	2	rs79001945;rs1778478	intergenic	4.057	7	H4C11, H1-5, ZSCAN9, ZKSCAN4, NKAPL, PGBD1, ZSCAN31, ZKSCAN3, ZSCAN12, ZSCAN23, ZNF311, OR2W1, OR2B3, OR2J3, OR2J2	ZNF391, ZNF165, ZKSCAN8, ZSCAN9, ZKSCAN4, NKAPL, PGBD1, ZSCAN31, ZKSCAN3, ZSCAN12, ZSCAN23, SCAND3, TRIM27, ZNF311	0.8468	4.54e-20	yes	rs115503606	6	25494503	29611788	0.9714	0.000271	no					0.248524	1.33683e-19	0.750443	0.00103262	rs11751928	0.306731
RA-VTE	14	6:33887984:C:T	rs78288301	6p21.32	6	33887984	1.40963e-11	33270393	33887984	46	14	3	rs210191;rs210171;rs78288301	2	rs210191;rs78288301	ncRNA_intronic	1.367	5	PFDN6, RGL2, TAPBP, BAK1, ITPR3, UQCC2, IP6K3, LEMD2	RPS18, TAPBP, BAK1	1.3911	1.14e-09	yes	rs74556364	6	33172905	33952273	1.0878	2.32e-06	no					0.614205	2.3248e-92	0.380469	0.00532605	rs74556364	1
RA-VTE	15	7:28166442:A:G	rs740122	7p15.1	7	28166442	2.3931e-11	28139386	28259233	82	32	2	rs740122;rs964653	1	rs740122	intronic	2.161	NA	JAZF1	JAZF1	0.9249	3.32e-07	no					0.9643	4.12e-08	yes	rs1513275	7	28139386	28259233	0.0002069	0.000637282	0.0272252	0.971926	rs740122	0.202258
RA-VTE	16	7:92248076:C:T	rs42235	7q21.2	7	92248076	3.50301e-12	92223518	92327026	53	29	3	rs42235;rs11773884;rs42031	1	rs42235	intronic	1.211	7	FAM133B, CDK6	KRIT1, GATAD1	1.0721	7.77e-07	no					1.0364	7.91e-10	yes	rs42235	7	92223518	92287849	1.12997e-05	0.00096829	0.0292979	0.969722	rs42235	0.258014
RA-VTE	17	7:128576086:C:T	rs3757387	7q32.1	7	128576086	2.2137e-08	128567032	128581835	14	1	1	rs3757387	1	rs3757387	intergenic	1.106	NA	IRF5	IRF5	1.1139	1.21e-16	yes	rs3778754	7	128567032	128735438	1.0152	0.01348	no					0.962652	1.23212e-13	0.0229513	0.0143967	rs3757387	0.119283
RA-VTE	18	8:11339882:C:T	rs2061831	8p23.1	8	11339882	8.95358e-10	11332026	11353110	26	18	1	rs2061831	1	rs2061831	intergenic	4.283	2b	FAM167A, BLK	FAM167A, BLK, FDFT1, CTSB, DEFB134	1.1119	3.35e-11	yes	rs2409780	8	11332026	11353110	1.0238	0.000284	no					0.38769	1.17316e-07	0.0280646	0.584243	rs2061831	0.148196
RA-VTE	19	9:136281886:C:T	rs28478009	9q34.2	9	136281886	1.12696e-09	136211422	136305530	103	3	1	rs28478009	1	rs28478009	intronic	7.144	2b	SURF6, MED22, RPL7A, SURF1, SURF2, SURF4, STKLD1, REXO4, ADAMTS13	SURF6, SURF1, REXO4, ADAMTS13	1.0773	0.005779	no					0.9379	2.26e-15	yes	rs28446901	9	135608078	136399315	1.41131e-216	0.880974	0.0943267	0.0246995	rs28446901	1
RA-VTE	20	10:71278942:A:G	rs1238704	10q22.1	10	71278942	4.23885e-09	71267834	71289190	33	6	1	rs1238704	1	rs1238704	intergenic	2.767	6	TSPAN15	TSPAN15	0.9604	0.008979	no					1.0428	1.17e-14	yes	rs78707713	10	71145819	71302731	4.92546e-93	0.89366	0.0833017	0.0230383	rs78707713	0.93749
RA-VTE	21	11:46714279:C:T	rs12274785	11p11.2	11	46714279	7.34085e-11	46691737	47182370	138	10	2	rs12274785;rs10838611	1	rs12274785	intronic	1.965	5	ATG13, ARHGAP1, ZNF408, F2, CKAP5, LRP4, CSTPP1, ARFGAP2	MDK, ATG13, ARHGAP1, ZNF408, F2, CKAP5, LRP4, CSTPP1, PACSIN3, DDB2, ACP2, NR1H3, MADD, PSMC3, PTPMT1, C1QTNF4, NUP160	0.9559	0.002588	no					1.0492	7.26e-17	yes	rs141325867	11	46304187	49444426	2.68308e-29	0.89597	0.0957039	0.00832594	rs3136516	0.999992
RA-VTE	22	11:61579760:C:T	rs174555	11q12.2	11	61579760	1.66776e-16	61542006	61624181	66	42	3	rs174555;rs968567;rs108499	1	rs174555	intronic	0.431	1f	MYRF, TMEM258, FEN1, FADS2, FADS1	TMEM132A, PGA5, CPSF7, MYRF, TMEM258, FADS2, FADS1, FADS3, B3GAT3	0.9362	2.25e-06	no					0.9474	3.33e-19	yes	rs174564	11	61539020	61658800	1.27005e-14	0.0124882	0.466377	0.521135	rs174555	0.365185
RA-VTE	23	12:111884608:C:T	rs3184504	12q24.12	12	111884608	2.53665e-17	111684461	112906415	580	204	4	rs3184504;rs1344438;rs2239195;rs11066320	2	rs3184504;rs11066320	exonic	11.21	3a	CUX2, PHETA1, SH2B3, ATXN2, BRAP, ACAD10, ALDH2, MAPKAPK5, TMEM116, NAA25, TRAFD1, HECTD4, RPL6, PTPN11	ANAPC7, HVCN1, PHETA1, SH2B3, ACAD10, ALDH2, MAPKAPK5, TMEM116, NAA25, HECTD4	1.0912	1.04e-10	yes	rs3184504	12	111826477	112883476	1.038	3.81e-12	yes	rs7137828	12	111818487	112906415	2.3165e-08	4.75374e-07	0.00786609	0.992133	rs3184504	0.562269
RA-VTE	24	15:38834033:C:T	rs8032939	15q14	15	38834033	2.36248e-09	38820606	38898759	29	9	1	rs8032939	1	rs8032939	intronic	2.343	7	RASGRP1	RASGRP1	1.1093	1.03e-12	yes	rs7170151	15	38820606	38925195	1.0202	0.001293	no					0.787196	8.49542e-09	0.0242945	0.18851	rs8032939	0.466221
RA-VTE	25	16:30811891:A:G	rs9921835	16p11.2	16	30811891	1.88132e-10	30584430	30947572	114	59	1	rs9921835	1	rs9921835	intergenic	5.533	6	ZNF688, ZNF785, ZNF689, PRR14, FBRS, SRCAP, PHKG2, CFAP119, RNF40, ZNF629, BCL7C, CTF1, FBXL19	ZNF768, PRR14, CFAP119, RNF40, CTF1, SETD1A, HSD3B7, STX1B, STX4, ZNF668, ZNF646, PRSS53, VKORC1, BCKDK, KAT8, PRSS36, ITGAX	1.0743	3.17e-07	no					1.0306	4.53e-07	yes	rs4889599	16	30801183	31109290	0.000100612	0.0113763	0.954884	0.0336384	rs9921835	0.100142
RA-VTE	26	16:75488935:C:T	rs4887829	16q23.1	16	75488935	1.25146e-10	75304497	75516739	377	197	1	rs4887829	1	rs4887829	intronic	4.616	6	BCAR1, CFDP1, TMEM170A, CHST6	ZFP1, CTRB1, BCAR1, CFDP1, TMEM170A	1.0488	0.000285	no					1.04	4.67e-13	yes	rs11649638	16	75304366	75519917	1.80757e-09	0.331147	0.137197	0.531656	rs28655617	0.0303969
RA-VTE	27	16:81874035:A:G	rs28734133	16q23.3	16	81874035	7.7966e-10	81859826	81892043	67	7	3	rs28734133;rs12918716;rs62044141	1	rs28734133	intronic	2.356	6	PLCG2	#N/A	1.0533	0.01104	no					1.0706	2.43e-22	yes	rs62044142	16	81844061	81980019	5.98139e-22	0.775064	0.0836699	0.141266	rs62044142	0.84259
RA-VTE	28	19:10754905:G:T	rs10948	19p13.2	19	10754905	1.7102e-20	10635631	10867517	214	61	7	rs1465700;rs117831057;rs10413128;rs10412541;rs10948;rs1529744;rs75219918	2	rs1465700;rs10948	UTR3	13.38	2b	S1PR5, ATG4D, KRI1, CDKN2D, AP1M2, SLC44A2, ILF3, QTRT1, DNM2	FDX2, ATG4D, KRI1, CDKN2D, AP1M2, SLC44A2, ILF3, DNM2, TMED1	1.0757	4.71e-07	yes	rs7251031	19	10408439	11275842	0.943	1.45e-23	yes	rs2360742	19	10633908	11180047	3.76018e-37	0.0024755	0.97593	0.0215946	rs2360742	0.157361
RA-VTE	29	20:33790993:C:T	rs977936	20q11.22	20	33790993	3.44592e-12	33223012	33885155	451	187	4	rs6088642;rs13041792;rs977936;rs8120559	2	rs6088642;rs977936	ncRNA_exonic	5.454	NA	PIGU, NCOA6, TP53INP2, GGT7, ACSS2, GSS, MYH7B, TRPC4AP, EDEM2, PROCR, MMP24, EIF6, FAM83C, UQCC1	MAP1LC3A, PIGU, NCOA6, TP53INP2, GGT7, ACSS2, GSS, MYH7B, TRPC4AP, EDEM2, PROCR, MMP24, UQCC1, GDF5, CPNE1	0.9487	0.003848	no					1.0681	3.1e-22	yes	rs6060308	20	32484835	34597962	8.90952e-54	0.781038	0.142977	0.0759846	rs6060288	0.569389
RA-HF	1	6:27885980:C:T	rs142863425	6p22.1	6	27885980	3.05766e-09	27885980	28423599	99	5	2	rs142863425;rs56295386	1	rs142863425	intergenic	1.594	7	OR2B2, OR2B6, ZNF165, ZSCAN16, ZKSCAN8, ZSCAN9, ZKSCAN4, NKAPL, PGBD1, ZSCAN31, ZKSCAN3, ZSCAN12	ZNF391, ZNF165, ZKSCAN8, ZSCAN9, NKAPL, PGBD1, ZSCAN31, ZSCAN12, ZSCAN23, SCAND3, TRIM27, ZNF311	0.8438	5.65e-13	yes	rs115503606	6	25494503	29611788	0.9571	0.003354	no					0.96072	5.93135e-21	0.0332902	0.00599011	rs11751928	0.287132
RA-HF	2	9:22072301:C:G	rs9632884	9p21.3	9	22072301	8.06966e-11	22048414	22125503	92	38	1	rs9632884	1	rs9632884	ncRNA_intronic	2.04	5	#N/A	#N/A	0.9588	0.001036	no					1.0584	3.84e-13	yes	rs1556516	9	21997872	22125503	9.93827e-11	0.723685	0.117678	0.158636	rs7859727	0.247331
RA-HF	3	11:118696022:C:T	rs11217044	11q23.3	11	118696022	3.89957e-08	118568715	118746433	169	1	1	rs11217044	1	rs11217044	intergenic	5.637	6	DDX6, CXCR5	PHLDB1, TREH, DDX6	0.8912	1.27e-12	yes	rs4938573	11	118486110	118746433	1.0238	0.01558	no					0.941471	1.00086e-09	0.0377172	0.0208117	rs4938573	0.112383
RA-HF	4	12:111904371:A:T	rs4766578	12q24.12	12	111904371	3.21348e-14	111826477	112943197	243	19	3	rs4766578;rs629404;rs11066320	2	rs4766578;rs11066320	intronic	1.682	6	SH2B3, ATXN2, BRAP, ACAD10, ALDH2, MAPKAPK5, TMEM116, ERP29, NAA25, TRAFD1, HECTD4, RPL6, PTPN11	PHETA1, SH2B3, ACAD10, ALDH2, MAPKAPK5, TMEM116, NAA25, HECTD4	1.0884	6.25e-10	yes	rs3184504	12	111826477	112883476	1.0443	4.9e-08	yes	rs4766578	12	111826477	112896840	0.00037443	7.87685e-07	0.0136922	0.985933	rs4766578	0.327097
RA-HF	5	15:70004775:C:T	rs4777183	15q23	15	70004775	4.8391e-08	69984593	70046503	33	1	1	rs4777183	1	rs4777183	intergenic	0.154	5	#N/A	#N/A	0.8834	1.27e-20	yes	rs919053	15	69964858	70048157	0.9843	0.04815	no					0.966088	3.27757e-18	0.0258032	0.00810871	rs919053	0.513618
RA-HF	6	17:38026361:C:G	rs11655292	17q12	17	38026361	3.55136e-10	37902887	38089717	135	51	1	rs11655292	1	rs11655292	intronic	0.961	7	GRB7, IKZF3, ZPBP2, GSDMB, ORMDL3, LRRC3C	FBXL20, PPP1R1B, PNMT, PGAP3, ERBB2, IKZF3, ZPBP2, GSDMB, ORMDL3, GSDMA, MED24, MSL1, CASC3	0.9302	9.25e-09	yes	rs4795395	17	37780296	38089717	1.031	9.46e-05	no					0.472774	8.59889e-06	0.213705	0.313493	rs9747973	0.0839697
RA-PAD	1	1:114134025:A:G	rs1235000	1p13.2	1	114134025	4.74915e-12	114078755	114447914	84	15	3	rs1235000;rs12144309;rs1310183	1	rs1235000	intronic	5.088	NA	MAGI3, PHTF1, RSBN1, PTPN22, BCL2L15, AP4B1, DCLRE1B	MAGI3, BCL2L15, AP4B1, BCAS2	0.907	9.14e-13	yes	rs2476601	1	113822487	114611487	0.9608	0.0077	no					0.829918	1.31284e-160	0.11026	0.0598224	rs2476601	1
RA-PAD	2	2:65710328:C:T	rs2244364	2p14	2	65710328	3.16665e-11	65595586	65716616	61	17	2	rs2244364;rs754110	1	rs2244364	ncRNA_intronic	7.963	4	SPRED2	SPRED2	1.056	3.28e-05	yes	rs1858037	2	65536082	65705581	0.9418	0.00032	no					0.00313624	1.05879e-07	0.996805	5.84884e-05	rs702875	0.107641
RA-PAD	3	2:102717337:C:T	rs10490571	2q12.1	2	102717337	5.18735e-09	102698360	102747313	22	2	1	rs10490571	1	rs10490571	intronic	2.692	NA	IL1R1	IL1R1, IL1RL2	0.9498	9.19e-05	no					1.0513	0.00062	no					0.00665434	0.226923	0.0671461	0.677013	rs10490571	0.549819
RA-PAD	4	6:26091336:C:T	rs2071303	6p22.2	6	26091336	2.15683e-10	26091336	27169028	39	5	3	rs2071303;rs113022279;rs111568057	2	rs2071303;rs113022279	intronic	4.501	NA	HFE, H4C3, H1-6, H2BC4, H2AC6, BTN3A2, BTN2A2, BTN3A1, BTN3A3, BTN2A1, ZNF322, H2BC12	SLC17A3, TRIM38, HFE, H1-6, BTN3A2, BTN3A1, HMGN4, ZNF322, H2BC15	0.9502	0.000128	yes	rs115503606	6	25494503	29611788	1.0618	0.00012	no					0.00317004	7.54688e-11	0.995692	0.0011375	rs41266841	0.809026
RA-PAD	5	6:28411244:A:G	rs13190937	6p22.1	6	28411244	1.44912e-18	28092993	28569338	98	15	2	rs13190937;rs16894116	1	rs13190937	UTR5	12.53	4	ZSCAN16, PGBD1, ZSCAN31, ZKSCAN3, ZSCAN12, ZSCAN23, GPX6, GPX5, SCAND3	ZNF391, ZNF165, ZSCAN9, ZKSCAN4, PGBD1, ZSCAN31, ZKSCAN3, ZSCAN12, ZSCAN23, SCAND3, TRIM27, OR2H2	0.8892	6.93e-18	yes	rs115503606	6	25494503	29611788	1.0513	0.00064	no					0.383011	1.09138e-19	0.612653	0.00433579	rs11751928	0.311316
RA-PAD	6	6:33480738:C:T	rs68191	6p21.32	6	33480738	1.12357e-13	33193989	33798018	122	19	6	rs35404844;rs68191;rs17527406;rs9469397;rs2967;rs6925273	4	rs35404844;rs68191;rs2967;rs6925273	intergenic	3.073	5	VPS52, RPS18, B3GALT4, WDR46, PFDN6, RGL2, TAPBP, DAXX, SYNGAP1, ZBTB9, BAK1, ITPR3, UQCC2, IP6K3, LEMD2, MLN	RING1, RPS18, TAPBP, DAXX, BAK1, ITPR3, UQCC2, IP6K3, LEMD2, HMGA1	0.7971	2.24e-23	yes	rs74556364	6	33172905	33952273	0.9048	0.00051	no					0.858916	6.44123e-93	0.10538	0.0357032	rs74556364	1
RA-PAD	7	9:22065002:C:G	rs10811647	9p21.3	9	22065002	1.10133e-12	21996623	22125347	112	6	2	rs10811647;rs1333039	1	rs10811647	ncRNA_intronic	9.386	4	CDKN2A, CDKN2B	#N/A	0.957	0.001775	no					1.0942	6.8e-10	yes	rs10738610	9	21997872	22125503	2.30956e-14	0.497884	0.0804978	0.421618	rs10811647	0.549473
RA-PAD	8	9:123705087:A:G	rs10818488	9q33.2	9	123705087	2.65524e-08	123636121	123723351	139	8	1	rs10818488	1	rs10818488	intergenic	1.221	4	PHF19, TRAF1, C5	MEGF9, FBXW2, PSMD5, PHF19, TRAF1, C5, CNTRL, RAB14	1.079	3.38e-09	yes	rs73541868	9	123636121	123723351	0.9704	0.084	no					0.81778	1.87823e-05	0.096	0.0860416	rs10818488	0.170369
RA-PAD	9	12:111904371:A:T	rs4766578	12q24.12	12	111904371	2.14278e-22	111719060	113039943	673	142	7	rs4545619;rs112796910;rs629404;rs77177960;rs4766578;rs11066320;rs233721	3	rs4545619;rs4766578;rs11066320	intronic	1.682	6	CUX2, PHETA1, SH2B3, ATXN2, BRAP, ACAD10, ALDH2, MAPKAPK5, TMEM116, ERP29, NAA25, TRAFD1, HECTD4, RPL6, PTPN11, RPH3A	ANAPC7, PHETA1, SH2B3, ACAD10, ALDH2, MAPKAPK5, TMEM116, NAA25, HECTD4	1.0884	6.25e-10	yes	rs3184504	12	111826477	112883476	1.0942	6.2e-10	yes	rs7137828	12	111826477	112906415	2.71573e-24	3.53517e-07	0.00559321	0.994406	rs7310615	0.887084
RA-PAD	10	15:69997327:A:G	rs12917282	15q23	15	69997327	8.299e-12	69964858	70048157	109	43	2	rs12917282;rs4777183	1	rs12917282	intergenic	3.525	5	#N/A	TLE3	0.8309	6.67e-14	yes	rs919053	15	69964858	70048157	1.0725	0.0048	no					0.891563	1.25946e-17	0.0991749	0.00926191	rs919053	0.621898
RA-PAD	11	15:77825149:A:C	rs17394448	15q24.3	15	77825149	8.64521e-09	77818094	77849724	45	3	1	rs17394448	1	rs17394448	ncRNA_exonic	1.171	1f	#N/A	PSTPIP1, TSPAN3, PEAK1, HMG20A, LINGO1	0.9291	2.29e-06	no					1.0408	0.0066	no					0.394843	0.00732274	0.387598	0.202781	rs17394448	0.295934
RA-PAD	12	17:38025208:C:T	rs11078925	17q12	17	38025208	1.38262e-08	37902887	38089717	137	11	1	rs11078925	1	rs11078925	intronic	7.078	6	GRB7, IKZF3, ZPBP2, GSDMB, ORMDL3, LRRC3C	FBXL20, PPP1R1B, PNMT, PGAP3, ERBB2, IKZF3, ZPBP2, GSDMB, ORMDL3, GSDMA, MED24, MSL1, CASC3	1.0802	1.04e-09	yes	rs4795395	17	37780296	38089717	0.9704	0.072	no					0.880004	1.6293e-06	0.0404723	0.0794863	rs11078925	0.155951
RA-PAD	13	19:10770292:A:G	rs7248558	19p13.2	19	10770292	3.57941e-08	10744807	10835405	77	3	1	rs7248558	1	rs7248558	intronic	0.922	7	SLC44A2, ILF3, QTRT1, DNM2	KRI1, SLC44A2, ILF3, DNM2	1.0743	6.49e-07	yes	rs7251031	19	10408439	11275842	0.9324	0.00025	no					0.289319	0.000420893	0.648121	0.0619507	rs7251031	0.538303
RA-Stroke	1	1:114447914:G:T	rs971173	1p13.2	1	114447914	3.12527e-10	114078037	114447914	47	6	2	rs971173;rs7515189	1	rs971173	UTR5	11.04	NA	MAGI3, RSBN1, PTPN22, BCL2L15, AP4B1, DCLRE1B	MAGI3, BCL2L15, AP4B1	0.8836	4.76e-19	yes	rs2476601	1	113822487	114611487	0.9811	0.006306	no					0.956565	4.42079e-161	0.0371422	0.00629283	rs2476601	1
RA-Stroke	2	4:26120478:A:G	rs36110812	4p15.2	4	26120478	1.70619e-08	26085480	26128710	28	4	1	rs36110812	1	rs36110812	intergenic	0.388	7	#N/A	RBPJ	1.1452	1.49e-21	yes	rs874040	4	26085018	26128710	1.0158	0.03649	no					0.97309	2.2082e-18	0.0147942	0.012116	rs36110812	0.142766
RA-Stroke	3	6:26338434:G:T	rs2893842	6p22.2	6	26338434	2.39157e-08	26211146	26338697	68	3	1	rs2893842	1	rs2893842	intergenic	0.418	6	H1-3, H4C8	H2BC5, H4C8, BTN3A2, HMGN4, ZNF322	1.0717	5.21e-07	yes	rs115503606	6	25494503	29611788	0.9752	0.00035	no					0.514536	2.10698e-13	0.474941	0.0105239	rs112014382	0.802663
RA-Stroke	4	6:28359700:C:T	rs2232428	6p22.1	6	28359700	1.14575e-10	28176181	28423599	80	15	2	rs2232428;rs16893817	1	rs2232428	intronic	0.673	NA	ZSCAN9, ZKSCAN4, NKAPL, PGBD1, ZSCAN31, ZKSCAN3, ZSCAN12	ZNF165, ZKSCAN8, ZSCAN9, NKAPL, ZSCAN31, ZSCAN12, SCAND3, TRIM27	0.816	1.98e-23	yes	rs115503606	6	25494503	29611788	0.9711	0.009848	no					0.880228	4.49733e-21	0.0251516	0.0946206	rs11751928	0.257174
RA-Stroke	5	6:29581966:C:G	rs116708563	6p22.1	6	29581966	3.59996e-10	29171892	29606280	15	5	1	rs116708563	1	rs116708563	intronic	0.794	5	OR5V1, OR12D3, MAS1L, UBD, GABBR1	#N/A	1.4005	1.1e-15	yes	rs115503606	6	25494503	29611788	1.0785	0.002829	no					0.958512	3.02896e-43	0.0291854	0.0123025	rs116105157	0.837535
RA-Stroke	6	6:33626717:C:T	rs2296343	6p21.31	6	33626717	4.98162e-10	33625600	33641721	12	4	1	rs2296343	1	rs2296343	intronic	12.37	NA	ITPR3	DAXX, ITPR3, UQCC2, IP6K3	1.1428	5.33e-22	yes	rs74556364	6	33172905	33952273	0.9841	0.02635	no					0.9629	1.69786e-93	0.0277776	0.00932246	rs74556364	1
RA-Stroke	7	7:92247333:A:G	rs42043	7q21.2	7	92247333	4.91732e-14	92236164	92327026	51	30	3	rs42043;rs17688839;rs2282983	1	rs42043	intronic	7.472	5	CDK6	KRIT1, GATAD1	1.0794	6.78e-07	no					0.9527	1.3e-10	yes	rs42036	7	92236164	92327026	2.7357e-06	0.000888314	0.0267953	0.972314	rs42043	0.622293
RA-Stroke	8	8:11341880:C:T	rs2736337	8p23.1	8	11341880	3.02571e-08	11332026	11353110	26	2	1	rs2736337	1	rs2736337	intergenic	2.701	3a	FAM167A, BLK	FAM167A, BLK, FDFT1, CTSB, DEFB134	1.1117	3.36e-11	yes	rs2409780	8	11332026	11353110	1.0221	0.004347	no					0.837699	2.07433e-07	0.0505436	0.111753	rs2736337	0.151403
RA-Stroke	9	9:22072719:A:G	rs10757270	9p21.3	9	22072719	1.64126e-09	21997872	22125503	82	23	2	rs10757270;rs10757277	1	rs10757270	ncRNA_intronic	2.254	7	CDKN2A, CDKN2B	#N/A	0.9547	0.000735	no					1.0407	8.36e-10	yes	rs944797	9	21997872	22125503	3.18905e-09	0.794322	0.129222	0.076456	rs944797	0.411138
RA-Stroke	10	12:111865049:C:G	rs7310615	12q24.12	12	111865049	5.36572e-21	111684461	113024793	672	166	8	rs7310615;rs678436;rs617044;rs2238151;rs933306;rs10744771;rs11066320;rs12580178	2	rs7310615;rs11066320	intronic	1.045	7	CUX2, PHETA1, SH2B3, ATXN2, BRAP, ACAD10, ALDH2, MAPKAPK5, TMEM116, ERP29, NAA25, TRAFD1, HECTD4, RPL6, PTPN11, RPH3A	ANAPC7, HVCN1, PHETA1, SH2B3, ACAD10, ALDH2, MAPKAPK5, TMEM116, NAA25, HECTD4	1.0926	1.15e-10	yes	rs3184504	12	111826477	112883476	1.0545	6.55e-16	yes	rs10774625	12	111826477	112985328	1.7453e-12	6.70213e-07	0.0115002	0.988499	rs10774625	0.742057
RA-Stroke	11	15:70010647:C:T	rs7170107	15q23	15	70010647	1.04961e-13	69964858	70048157	93	22	2	rs7170107;rs71393465	2	rs7170107;rs71393465	intergenic	1.975	3a	#N/A	TLE3	1.1557	4.48e-22	yes	rs919053	15	69964858	70048157	0.977	0.001525	no					0.859935	5.70865e-18	0.0448611	0.0952043	rs7170107	0.629407
RA-Stroke	12	19:10756399:C:T	rs1975163	19p13.2	19	10756399	1.02049e-08	10727014	10835405	116	25	2	rs1975163;rs7250421	1	rs1975163	intergenic	0.389	NA	SLC44A2, ILF3, QTRT1, DNM2	KRI1, AP1M2, SLC44A2, ILF3, DNM2, C19orf38	1.0754	4.6e-07	yes	rs7251031	19	10408439	11275842	0.9727	0.000185	no					0.00723578	0.00250421	0.988197	0.00204485	rs1975163	0.0834546
RA-Stroke	13	20:44721656:C:T	rs4578918	20q13.12	20	44721656	5.67114e-09	44680412	44747947	18	2	1	rs4578918	1	rs4578918	intergenic	1.536	3a	SLC12A5, NCOA5, CD40	CD40	0.9137	1.4e-09	yes	rs4239702	20	44680412	44749251	1.0244	0.001273	no					0.945011	1.15257e-08	0.0325901	0.0223985	rs4239702	0.250005
RA-Stroke	14	22:21933428:C:T	rs5754177	22q11.21	22	21933428	5.45827e-09	21910280	21985094	110	15	1	rs5754177	1	rs5754177	intronic	2.048	5	UBE2L3, YDJC, CCDC116	UBE2L3, YDJC, CCDC116	1.1016	4.82e-09	yes	rs11089637	22	21911220	21985094	1.0282	0.000413	no					0.748014	2.28232e-06	0.0277952	0.224128	rs5754177	0.11313
SLE-AF	1	1:155028522:A:G	rs11264302	1q21.3	1	155028522	4.66896e-10	155027694	155030557	5	1	1	rs11264302	1	rs11264302	intronic	2.211	5	DCST1, ADAM15, EFNA4, EFNA3	ZBTB7B, DCST2, ADAM15	0.91	0.00211531	no					0.9481	3.75e-15	yes	rs11264278	1	154395125	155668700	6.78593e-72	0.896605	0.0898218	0.013573	rs11264278	1
SLE-AF	2	1:161479745:A:G	rs1801274	1q23.3	1	161479745	5.60508e-10	161463601	161479745	7	5	1	rs1801274	1	rs1801274	exonic	0.979	NA	FCGR2A	FCGR2B	0.83	5.56e-11	yes	rs6671847	1	161460211	161479745	1.0245	0.000285	no					0.565266	1.84788e-07	0.0440567	0.390675	rs6671847	0.342736
SLE-AF	3	2:201206706:C:T	rs11890234	2q33.1	2	201206706	1.10459e-08	201160499	201242293	59	9	1	rs11890234	1	rs11890234	intronic	1.713	7	SPATS2L	SATB2, C2orf69, TYW5, MAIP1, SPATS2L	1.07	0.0197157	no					1.0606	9.58e-19	yes	rs3820888	2	200715388	201253956	5.28768e-19	0.905185	0.0611532	0.0336621	rs56326533	0.297493
SLE-AF	4	3:58292579:A:G	rs4681842	3p14.3	3	58292579	1.0189e-08	58220106	58456811	243	20	1	rs4681842	1	rs4681842	intronic	6.503	2b	ABHD6, RPP14, PXK, PDHB	DNASE1L3, ABHD6, RPP14, PXK, PDHB, ACOX2	0.86	2.49e-06	no					0.9683	1.39e-05	no					0.363148	0.000371666	0.278935	0.357063	rs4681842	0.0499856
SLE-AF	5	6:18359574:A:T	rs10949498	6p22.3	6	18359574	3.49336e-08	18210561	18401608	43	1	1	rs10949498	1	rs10949498	intergenic	4.105	5	KDM1B, DEK, RNF144B	TPMT, KDM1B, DEK, RNF144B	0.92	0.0283243	no					1.0685	6.71e-18	yes	rs10949498	6	18210561	18401608	4.06397e-13	0.786455	0.120807	0.0927379	rs10949498	0.247909
SLE-AF	6	6:27300310:A:G	rs13212562	6p22.2	6	27300310	4.11242e-10	25700342	28293408	470	9	4	rs4712972;rs11966360;rs13212562;rs16897515	2	rs4712972;rs13212562	intergenic	2.083	4	SCGN, SLC17A4, SLC17A1, SLC17A3, SLC17A2, TRIM38, H1-1, H4C2, H1-2, HFE, H4C3, H1-6, H2BC4, H2AC6, BTN3A1, BTN3A3, BTN2A1, BTN1A1, HMGN4, ABT1, ZNF322, H2BC11, H2AC11, PRSS16, POM121L2, ZNF391, ZNF184, H2BC13, H2AC13, H4C11, H2BC15, H1-5, H3C12, OR2B2, OR2B6, ZNF165, ZSCAN16, ZKSCAN8, ZSCAN9, ZKSCAN4, NKAPL, PGBD1, ZSCAN31	SLC17A4, TRIM38, HFE, H2BC5, H4C8, BTN3A2, BTN2A2, BTN2A1, HMGN4, ZNF322, H2BC11, H2BC12, PRSS16, ZNF391, H2BC15, ZNF165, ZSCAN16, ZSCAN9, ZKSCAN4, NKAPL, PGBD1, ZSCAN31, ZKSCAN3, ZSCAN23	1.55	2.79e-22	yes	rs144447022	6	25182925	29607101	0.973	0.01353	no					0.864751	2.42658e-28	0.12384	0.011409	rs13202295	0.359342
SLE-AF	7	8:11352541:C:T	rs2618476	8p23.1	8	11352541	1.73326e-08	11332026	11402063	51	5	2	rs2618476;rs2618437	1	rs2618476	intronic	6.645	1d	FAM167A, BLK	SOX7, MTMR9, SLC35G5, FAM167A, BLK, NEIL2, FDFT1, CTSB, DEFB134	1.27	1.58e-14	yes	rs2736332	8	10745469	11402063	0.9807	0.01054	no					0.00187052	3.90443e-12	0.998088	4.12173e-05	rs4840568	0.461842
SLE-AF	8	8:124552133:C:T	rs62521287	8q24.13	8	124552133	1.18587e-10	124542519	124647557	89	15	2	rs62521287;rs62521282	1	rs62521287	intronic	7.47	4	FBXO32	NTAQ1, FBXO32, KLHL38	0.84	0.00377533	no					1.1258	1.75e-18	yes	rs78332318	8	124542519	124647557	4.80084e-14	0.497162	0.07436	0.428478	rs62521287	0.305884
SLE-AF	9	10:75637377:C:T	rs12569822	10q22.2	10	75637377	2.35694e-09	75416703	75695919	90	28	2	rs12569822;rs4745724	1	rs12569822	intergenic	5.692	5	SYNPO2L, AGAP5, SEC24C, FUT11, CHCHD1, ZSWIM8, NDST2, CAMK2G, PLAU	NUDT13, FAM149B1, CFAP70, USP54, MYOZ1, SYNPO2L, AGAP5, FUT11, NDST2, CAMK2G, PLAU, VCL, AP3M1, ADK	0.9	0.00242951	no					0.9389	1.76e-13	yes	rs60212594	10	74796759	75690059	2.02568e-29	0.832642	0.124444	0.0429142	rs7915134	0.470615
SLE-AF	10	10:105637026:C:T	rs34547036	10q24.33	10	105637026	3.51496e-08	105609822	105694301	25	2	1	rs34547036	1	rs34547036	downstream	4.834	6	SH3PXD2A, STN1	STN1, SLK	1.09	0.0403637	no					1.1041	8.58e-21	yes	rs11598047	10	103555611	105720351	6.3183e-60	0.895551	0.0756971	0.0287519	rs11598047	0.635029
SLE-AF	11	12:24801854:C:T	rs7960243	12p12.1	12	24801854	3.60506e-09	24697192	24822366	99	28	3	rs7960243;rs11047492;rs11047503	1	rs7960243	intergenic	1.788	7	#N/A	#N/A	1.12	0.00279096	no					1.0652	3.84e-13	yes	rs11047539	12	24591890	24920794	9.97068e-20	0.507272	0.479272	0.0134555	rs137913153	0.207324
SLE-AF	12	14:64862892:A:G	rs12587229	14q23.2	14	64862892	1.21606e-08	64686207	64878265	61	1	1	rs12587229	1	rs12587229	intronic	1.383	7	SYNE2, ESR2, MTHFD1	SYNE2, ESR2, MTHFD1, PLEKHG3	0.92	0.00856914	no					1.0542	1.42e-14	yes	rs1152591	14	64612845	64877135	2.25005e-25	0.853993	0.0972572	0.0487494	rs1152591	0.936063
SLE-AF	13	17:7452977:C:T	rs9899183	17p13.1	17	7452977	2.86598e-08	7438050	7533423	40	1	1	rs9899183	1	rs9899183	intronic	9.483	4	TNFSF12, TNFSF13, SENP3, MPDU1, SOX15, FXR2, SHBG, SAT2	CTDNEP1, ACAP1, CHRNB1, TNFSF12, TNFSF13, SHBG, SAT2, ATP1B2	1.11	0.00147661	no					0.9558	2.02e-09	yes	rs9899183	17	7351479	7533423	0.00135647	0.019838	0.943514	0.035263	rs9899183	0.505925
SLE-AF	14	17:38066267:G:T	rs1008723	17q12	17	38066267	7.2184e-13	37780296	38089717	220	58	2	rs1008723;rs4252627	1	rs1008723	intronic	2.705	6	PPP1R1B, STARD3, TCAP, PNMT, PGAP3, ERBB2, MIEN1, GRB7, IKZF3, ZPBP2, GSDMB, ORMDL3, LRRC3C	STAC2, FBXL20, PPP1R1B, STARD3, PNMT, PGAP3, ERBB2, IKZF3, ZPBP2, GSDMB, ORMDL3, GSDMA, CSF3, MED24, MSL1, CASC3	0.8696	8.29e-07	no					1.0429	2.62e-10	yes	rs12944882	17	37780296	38082807	3.47997e-06	0.00153417	0.422423	0.57604	rs1008723	0.091378
SLE-AF	15	17:43901558:A:G	rs62057144	17q21.31	17	43901558	1.91938e-08	43463493	44865603	3855	153	1	rs62057144	1	rs62057144	intronic	5.68	5	ARHGAP27, PLEKHM1, CRHR1, SPPL2C, MAPT, STH, KANSL1, ARL17B, LRRC37A, NSF, WNT3	DCAKD, PLCD3, ACBD4, ARHGAP27, PLEKHM1, CRHR1, MAPT, KANSL1, ARL17B, LRRC37A, NSF, WNT3	0.89	0.000519	no					1.0486	1.92e-08	yes	rs17608766	17	43463493	45244074	6.30751e-05	0.123783	0.168467	0.707641	rs117646503	0.0142912
SLE-AF	16	22:21984379:A:G	rs3747093	22q11.21	22	21984379	1.06295e-10	21911220	21985094	106	63	1	rs3747093	1	rs3747093	upstream	3.364	2b	UBE2L3, YDJC, CCDC116	UBE2L3, YDJC, CCDC116	1.3	2.88e-14	yes	rs3747093	22	21911220	21985094	1.0289	0.000673	no					0.645191	2.86832e-10	0.0397523	0.315057	rs3747093	0.508214
SLE-CAD	1	1:38349400:A:G	rs12728438	1p34.3	1	38349400	1.70456e-08	38238071	38379018	43	11	1	rs12728438	1	rs12728438	intronic	3.758	4	EPHA10, MANEAL, YRDC, C1orf122, MTF1, INPP5B	C1orf122, MTF1, INPP5B, SF3A3, FHL3, UTP11	0.88	8.1e-05	no					1.03	1.16e-07	yes	rs28470722	1	38238071	38463504	2.2056e-06	0.675008	0.291083	0.0339021	rs28470722	0.109553
SLE-CAD	2	1:114377568:A:G	rs2476601	1p13.2	1	114377568	3.54631e-17	114075796	114451386	238	17	3	rs2476601;rs11102694;rs4145859	1	rs2476601	exonic	17.25	2b	MAGI3, PHTF1, RSBN1, PTPN22, BCL2L15, AP4B1, DCLRE1B	MAGI3, PHTF1, AP4B1, DCLRE1B, OLFML3	1.39	8.38e-13	yes	rs2476601	1	114303808	114377568	1.0551	1.18e-10	yes	rs3761936	1	114075796	114451386	2.35254e-07	4.35699e-08	0.0342511	0.965749	rs2476601	0.999985
SLE-CAD	3	2:163110536:A:G	rs2111485	2q24.2	2	163110536	1.62639e-09	163110536	163124051	2	2	1	rs2111485	1	rs2111485	intergenic	1.528	7	FAP, IFIH1	#N/A	0.87	3.69e-06	no					0.974	2.31e-07	no					0.0010868	0.00175154	0.00138425	0.994977	rs2111485	0.687007
SLE-CAD	4	2:204190907:C:T	rs4675332	2q33.2	2	204190907	1.71207e-09	204187951	204285774	11	7	1	rs4675332	1	rs4675332	intergenic	5.903	5	ABI2, RAPH1	ICA1L, CARF, NBEAL1	0.92	0.0144095	no					1.0573	4.47e-22	yes	rs148812085	2	203131937	204520032	3.26506e-45	0.856149	0.116154	0.0276975	rs148812085	0.0956415
SLE-CAD	5	6:12785023:C:T	rs2327617	6p24.1	6	12785023	5.48073e-09	12758654	12865689	127	1	1	rs2327617	1	rs2327617	intronic	0.173	7	PHACTR1	PHACTR1	1.07	0.0151437	no					0.9529	5.9e-20	yes	rs7454157	6	12718156	13139616	1.56533e-53	0.909809	0.0583414	0.0318492	rs7454157	0.989695
SLE-CAD	6	6:34655000:C:T	rs2744961	6p21.31	6	34655000	8.32207e-12	34549699	34832661	322	205	1	rs2744961	1	rs2744961	intronic	1.725	NA	ILRUN, SNRPC, BLTP3A	ILRUN, SNRPC, BLTP3A	1.15	2.94e-06	yes	rs7752538	6	34549107	35114958	1.0343	6.68e-11	yes	rs9469899	6	34548206	34832661	6.43327e-06	0.000667812	0.952471	0.046855	rs2744961	0.284504
SLE-CAD	7	6:160954505:A:G	rs3124785	6q25.3	6	160954505	1.9993e-09	160710461	160974428	157	7	2	rs3124785;rs2665357	1	rs3124785	intronic	2.696	7	SLC22A3, LPA	MRPL18, SLC22A3, LPA	1.09	0.00532487	no					1.0475	1.64e-17	yes	rs186696265	6	160242487	161682569	7.11999e-109	0.813106	0.120062	0.0668317	rs186696265	1
SLE-CAD	8	10:44435246:C:T	rs4948582	10q11.21	10	44435246	3.63906e-08	44435246	44448299	9	2	1	rs4948582	1	rs4948582	ncRNA_exonic	0.025	5	#N/A	#N/A	1.08	0.0130535	no					0.9585	1.03e-15	yes	rs494207	10	44354542	44832431	5.84979e-20	0.834983	0.127878	0.0371393	rs494207	0.136296
SLE-CAD	9	10:63819425:A:G	rs10995021	10q21.2	10	63819425	4.01264e-08	63802574	63825807	33	2	1	rs10995021	1	rs10995021	intronic	19.89	4	ARID5B	#N/A	1.16	1.7e-07	no					0.9812	0.000148	no					0.426092	0.000596109	0.0520813	0.516402	rs10995021	0.289716
SLE-CAD	10	11:118940957:C:G	rs1784302	11q23.3	11	118940957	2.56306e-08	118913993	118958869	54	14	1	rs1784302	1	rs1784302	exonic	18.6	5	HYOU1, VPS11, HMBS, H2AX, DPAGT1	SLC37A4, VPS11, HMBS, NHERF4, CCDC153, RNF26	0.91	0.00124565	no					1.0324	2.74e-10	yes	rs1177562	11	118913993	118958869	5.30247e-06	0.320369	0.0954656	0.584142	rs1177562	0.209362
SLE-CAD	11	12:112059557:C:T	rs11065979	12p24.12	12	112059557	2.97421e-19	111826477	112985328	95	13	2	rs11065979;rs7300285	1	rs11065979	intergenic	3.379	5	SH2B3, ATXN2, BRAP, ACAD10, ALDH2, MAPKAPK5, TMEM116, ERP29, NAA25, TRAFD1, HECTD4, RPL6, PTPN11	SH2B3, ACAD10, ALDH2, MAPKAPK5, TMEM116, NAA25	1.17	1.01e-07	no					1.0521	1.15e-22	yes	rs10774625	12	111359712	113200293	2.7525e-24	6.74687e-05	0.00531856	0.994614	rs10774625	0.544777
SLE-CAD	12	14:100136575:A:C	rs9324011	14q32.31	14	100136575	9.61758e-09	100119440	100149458	6	3	2	rs9324011;rs3783320	1	rs9324011	intronic	3.794	6	HHIPL1, CYP46A1	HHIPL1	1.07	0.0160955	no					0.9555	3.72e-19	yes	rs36033161	14	100110120	100189109	2.56807e-19	0.793272	0.176133	0.0305954	rs36033161	0.217723
SLE-CAD	13	15:91411656:C:T	rs4932178	15q26.1	15	91411656	4.41246e-08	91403674	91439417	24	1	1	rs4932178	1	rs4932178	upstream	8.645	4	FURIN, FES, MAN2A2	FURIN, FES, MAN2A2	0.94	0.0454272	no					1.0543	9.93e-23	yes	rs8039305	15	91397733	91443059	7.01365e-27	0.798608	0.100682	0.10071	rs8039305	0.934985
SLE-CAD	14	17:47404628:G:T	rs62076439	17q21.32	17	47404628	3.86929e-08	47320418	47461433	86	1	1	rs62076439	1	rs62076439	intronic	0.412	7	ZNF652	GNGT2, ZNF652	0.93	0.0131193	no					1.0425	1.25e-15	yes	rs62076439	17	44967530	47514127	1.62061e-10	0.651285	0.261097	0.0876186	rs62076439	0.270393
SLE-CAD	15	19:17842221:C:G	rs12104396	19p13.11	19	17842221	1.21746e-08	17826412	17875755	47	10	1	rs12104396	1	rs12104396	ncRNA_intronic	1.522	5	MAP1S, FCHO1	MAP1S, FCHO1, B3GNT3	1.08	0.00466176	no					0.9632	5.56e-14	yes	rs10410487	19	17826412	17893602	1.35189e-09	0.530505	0.306757	0.162738	rs10410487	0.265481
SLE-CAD	16	19:45400747:A:T	rs61679753	19q13.32	19	45400747	2.60511e-08	45369203	45402262	7	1	1	rs61679753	1	rs61679753	intronic	2.466	7	NECTIN2, TOMM40, APOE	TOMM40	1.19	0.0203586	no					0.8765	2.04e-18	yes	rs7412	19	45253491	46374916	3.32576e-49	0.784707	0.0597566	0.155536	rs7412	1
SLE-VTE	1	1:161479745:A:G	rs1801274	1q23.3	1	161479745	5.03858e-11	161463601	161479745	7	5	1	rs1801274	1	rs1801274	exonic	0.979	NA	FCGR2A	FCGR2B	0.83	5.56e-11	yes	rs6671847	1	161460211	161479745	1.0218	5.98e-05	no					0.0419166	3.53988e-06	0.851348	0.106732	rs6671847	0.450942
SLE-VTE	2	1:169572645:C:T	rs2205895	1q24.2	1	169572645	2.08696e-09	169107331	169577333	94	3	2	rs115289994;rs2205895	2	rs115289994;rs2205895	intronic	2.892	NA	ATP1B1, NME7, CCDC181, SLC19A2, F5, SELP	CCDC181, F5, SELP, SELL	1.11	0.000748	no					0.9636	9.05e-11	yes	rs1894692	1	168496949	170178132	0	0.852626	0.106746	0.0406279	rs1894692	1
SLE-VTE	3	2:128184770:C:T	rs5937	2q14.3	2	128184770	4.86806e-08	127990177	128196398	80	1	1	rs5937	1	rs5937	exonic	8.894	4	ERCC3, MAP3K2, PROC, IWS1	ERCC3, MAP3K2, PROC, GPR17	0.94	0.060377	no					1.0562	4.29e-22	yes	rs1799809	2	127932551	128375094	4.34818e-26	0.855035	0.130464	0.0145008	rs1799809	0.470462
SLE-VTE	4	2:191922841:A:G	rs3024866	2q32.2	2	191922841	1.80975e-08	191900449	191933254	11	2	1	rs3024866	1	rs3024866	intronic	13.41	NA	STAT4	#N/A	1.34	1.02e-19	yes	rs7574865	2	191502767	191973034	1.0138	0.02473	no					0.970787	2.74023e-60	0.0186604	0.0105527	rs7574865	0.334771
SLE-VTE	5	4:155451187:A:G	rs6819508	4q31.3	4	155451187	3.24879e-09	155379883	155461467	17	5	2	rs11731813;rs6819508	2	rs11731813;rs6819508	intergenic	0.852	4	DCHS2, PLRG1	DCHS2, FGG	0.91	0.0225662	no					0.9241	8.86e-23	yes	rs2066864	4	155106847	155553541	3.33259e-183	0.866567	0.118725	0.0147087	rs2066864	0.399085
SLE-VTE	6	6:25546801:A:G	rs530145	6p22.2	6	25546801	6.09898e-14	25371369	28569338	777	255	10	rs530145;rs926326;rs35789010;rs9467632;rs7749823;rs9467713;rs1575534;rs13212562;rs56874662;rs6456814	4	rs530145;rs9467632;rs13212562;rs6456814	intronic	3.787	7	CARMIL1, SCGN, SLC17A4, SLC17A1, SLC17A3, SLC17A2, TRIM38, H1-1, H4C2, H1-2, HFE, H4C3, H1-6, H2BC4, H2AC6, H1-4, H2BC5, H3C4, H2AC7, H1-3, BTN3A1, BTN3A3, BTN2A1, BTN1A1, HMGN4, ABT1, ZNF322, H2BC11, H2AC11, PRSS16, POM121L2, ZNF391, ZNF184, H2BC13, H2AC13, H4C11, H2BC15, H1-5, H3C12, OR2B2, OR2B6, ZNF165, ZSCAN16, ZKSCAN8, ZSCAN9, ZKSCAN4, NKAPL, PGBD1, ZSCAN31, ZKSCAN3, ZSCAN12, ZSCAN23, SCAND3	CARMIL1, SCGN, SLC17A4, SLC17A1, TRIM38, HFE, H2AC6, H2BC5, H4C8, BTN3A2, BTN2A2, BTN2A1, HMGN4, ZNF322, H2BC11, H2BC12, PRSS16, ZNF391, H2BC15, ZNF165, ZSCAN16, ZSCAN9, ZKSCAN4, NKAPL, PGBD1, ZSCAN31, ZKSCAN3, ZSCAN12, ZSCAN23, SCAND3, TRIM27, OR2H2	1.15	1.5e-06	yes	rs144447022	6	25182925	29607101	0.9619	1.75e-12	yes	rs214060	6	25525120	26123502	1.78639e-08	2.1565e-15	1	5.65455e-09	rs41266779	0.110003
SLE-VTE	7	6:34655000:C:T	rs2744961	6p21.31	6	34655000	6.96506e-09	34549699	34832661	322	15	1	rs2744961	1	rs2744961	intronic	1.725	NA	ILRUN, SNRPC, BLTP3A	ILRUN, SNRPC, BLTP3A	1.15	2.94e-06	yes	rs7752538	6	34549107	35114958	1.0257	6.28e-06	no					0.0127615	0.000688107	0.981461	0.00508084	rs2744961	0.092975
SLE-VTE	8	8:11339965:C:G	rs2736332	8p23.1	8	11339965	2.96495e-12	11332964	11353110	25	18	1	rs2736332	1	rs2736332	intergenic	0.774	4	FAM167A, BLK	FAM167A, BLK, FDFT1	1.32	4.83e-18	yes	rs2736332	8	10745469	11402063	1.0224	0.000459	no					0.400718	1.15837e-13	0.0290412	0.570241	rs2736332	0.497959
SLE-VTE	9	9:136059310:C:T	rs11244025	9q34.2	9	136059310	1.17896e-11	136042530	136357536	62	24	4	rs11244025;rs11244033;rs62574607;rs28688220	3	rs11244025;rs62574607;rs28688220	intergenic	5.13	7	RALGDS, GBGT1, OBP2B, SURF6, SLC2A6	CEL, SURF6, MED22, REXO4, CACFD1, SLC2A6	0.91	0.00416992	no					1.0636	3.68e-22	yes	rs28446901	9	135608078	136399315	1.64481e-216	0.864388	0.109936	0.0256758	rs28446901	1
[truncated: 522 more rows]

## Sheet: Supplementary Table 7
Supplementary Table 7. Genomic risk loci identified for single trait GWAS results of six autoimmune diseases and six cardiovascular diseases using FUMA
[truncated: 711 more rows]

[truncated: 11 more sheets: Supplementary Table 8, Supplementary Table 9, Supplementary Table 10, Supplementary Table 11, Supplementary Table 12, Supplementary Table 13, Supplementary Table 14, Supplementary Table 15, Supplementary Table 16, Supplementary Table 17, Supplementary Table 18]
